# Supplementary material for: PlantRep: a database of plant repetitive elements
Source: Plant Cell Rep. 2022 Jan 3;41(4):1163–6. doi: 10.1007/s00299-021-02817-y (PMC9035001; doi:10.1007/s00299-021-02817-y)
Supplement: Supplementary file 3 — Supplementary file3 (XLSX 335 kb) [file 299_2021_2817_MOESM3_ESM.xlsx]

## Sheet: 2a length_genome
Supplementary Table 2a The length of actutal repeat in different plant genome
Calculation method: The repeat name based on the DFAM database, according the result of homo annonation Repeatmask, the sum of the lengths of each repeat sequence was calculated.
NO	Species name	DIRS	LINE	LTR	PLE	SINE	unknown	Circular_dsDNA	DNA_Polymerase	Rolling_Circle	TIR	RNA	Low_complexity	Satellite	Simple_repeat	Unknown	Total_repeat_length	Genome_size_length	species_type
1	Chloropicon primus	0	0	3146	0	0	0	0	0	0	120462	0	118404	0	608009	388980	1239001	17400691	01_Alage
2	Edaphochlamys debaryana	48650	1451288	512036	20908	20667	0	0	0	282523	206820	0	1212148	0	5308229	5809683	14872952	120364444	01_Alage
3	Bathycoccus prasinos	0	0	17297	11164	0	0	0	74123	0	72934	0	123548	0	570150	270555	1139771	15074320	01_Alage
4	Ostreococcus tauri	0	1816	0	0	0	0	0	0	17731	27260	0	12827	5409	472204	289223	826470	13032761	01_Alage
5	Micromonas	71682	5317	107503	3936	0	0	84496	0	54757	334358	0	9972	0	546516	751316	1969853	13204888	01_Alage
6	Micromonas commoda	0	0	14604	0	0	0	0	0	2889	0	0	20204	0	267390	1682138	1987225	19582411	01_Alage
7	Micromonas pusilla	0	0	2336	0	0	0	0	4616	0	35984	0	50335	0	669581	389745	1152597	21109336	01_Alage
8	Bathycoccus	0	0	8706	0	0	0	2574	0	0	13631	0	60660	0	1887316	1445543	3418430	21958260	01_Alage
9	unclassified Mamiellophyceae	2870	34110	32879	4339	6555	0	13165	14290	0	193092	0	65734	4255	447794	49929	869012	10057911	01_Alage
10	Cymbomonas tetramitiformis	0	0	0	0	0	0	0	0	0	0	0	9327	0	83284	118994	211605	10283426	01_Alage
11	Chlamydomonas	2689515	4061461	5669632	175842	147345	0	102244	73415	91280	2497957	0	205216	39463	2223480	52775221	70752071	281270454	01_Alage
12	Chlamydomonas applanata	0	107755	45458	0	8476	0	0	0	19362	134600	0	1405450	0	5490438	3819774	11031313	114119837	01_Alage
13	Chlamydomonas applanata	7237	1129881	492422	0	0	0	8840	0	0	60176	0	291784	0	2598065	2144307	6732712	78504178	01_Alage
14	Chlamydomonas asymmetrica	3237	2256886	612019	61804	0	0	0	0	53979	867570	0	191096	10107	3598341	10392782	18047821	141916335	01_Alage
15	Chlamydomonas debaryana	29514	1612461	731845	0	29277	0	0	0	288479	205622	0	1215529	0	5316666	5497622	14927015	120364444	01_Alage
16	Chlamydomonas eustigma	0	339349	759175	0	0	0	0	6467	83841	4497	0	37204	0	432265	1961181	3623979	66629526	01_Alage
17	Chlamydomonas reinhardtii	8867	5248326	480209	37080	138717	0	0	75808	418145	3091300	16073	710561	335636	6712709	7009431	24282862	120404952	01_Alage
18	Chlamydomonas sphaeroides	95883	1943985	689168	56313	2611	0	0	0	8135	77058	0	880776	0	6330256	6784989	16869174	122189241	01_Alage
19	Chloromonas	16380	864590	222007	0	2998	0	48848	197900	0	464112	22570	119091	83526	1753626	10009468	13805116	102365718	01_Alage
20	Eudorina	557532	14350284	4559313	539327	2007473	0	0	52583	2964090	11816044	4021608	864565	480869	10754838	23374728	76343254	184032255	01_Alage
21	Gonium pectorale	174331	1788634	927334	39750	49310	0	0	0	76580	490585	0	745395	0	4670454	9431643	18394016	148806073	01_Alage
22	Volvox carteri	1325670	6013214	5256822	35778	402377	0	80601	136662	1032313	3258387	272319	521777	275756	6230757	11743330	36585763	137684403	01_Alage
23	Yamagishiella unicocca	362843	7928467	4549923	48806	389109	0	0	0	172958	3714336	1247098	608736	199728	5295974	24976197	49494175	134234618	01_Alage
24	Haematococcus	0	1162200	248114	132016	9666	0	156300	0	0	130056	0	254857	6677	2260536	1722543	6082965	77829956	01_Alage
25	Haematococcus lacustris	181809	21668451	15778117	123433	74563	0	727972	144417	1430255	6549363	0	2256933	128763	20202191	82696146	151962413	365773732	01_Alage
26	Characiochloris	15427	701284	158539	22180	1123	0	0	71133	0	359477	56092	104013	13412	1557064	9270704	12330448	95477124	01_Alage
27	Dunaliella	0	161514	42883	0	0	0	0	0	0	558388	0	31142	0	676557	475925	1946409	25538156	01_Alage
28	Dunaliella salina	89529	51388009	5785256	229585	12595	0	6139	0	160128	4236184	76898	266334	135874	9093194	69096788	140576513	343704028	01_Alage
29	Tetrabaena socialis	0	1691303	362842	13984	0	0	0	0	148432	1214858	0	569283	35601	4628833	11114791	19779927	135779852	01_Alage
30	Mychonastes homosphaera	0	0	215978	0	0	0	0	0	0	26448	0	263805	0	3657355	87753	4251339	24204206	01_Alage
31	Messastrum gracile	0	93587	72718	0	0	0	0	0	0	211745	0	616877	10863	4425733	678304	6109827	60662915	01_Alage
32	Monoraphidium	0	7483808	1884522	3922	28014	0	37363	32835	0	190170	0	28044	0	1275477	3155031	14119186	74658904	01_Alage
33	Monoraphidium neglectum	0	701611	4132	0	0	0	0	0	0	1428947	0	198058	0	3960151	664280	6957179	69711829	01_Alage
34	Raphidocelis subcapitata	2259	123125	36702	0	0	0	0	0	0	28224	0	508144	0	5291572	1020933	7010959	51162697	01_Alage
35	Desmodesmus armatus	146196	8898334	1523705	71859	338667	0	90124	114973	1851	1517760	196346	373863	41299	4469714	8880822	26665513	115870282	01_Alage
36	Scenedesmus	16732	10792610	2078390	0	3136	0	15124	0	6492	348063	0	49390	5112	6359806	1511561	21186416	93238253	01_Alage
37	Scenedesmus quadricauda	0	173971	8375	0	8799	0	0	0	0	407743	7748	95231	0	2787912	551551	4041330	65353879	01_Alage
38	Scenedesmus vacuolatus	0	1520662	312544	0	0	0	0	0	0	0	0	8915	0	518686	175853	2536660	23358248	01_Alage
39	Coelastrella	0	3827072	452259	0	7951	0	0	0	0	148065	0	22234	0	1324324	2911952	8693857	80221759	01_Alage
40	Tetradesmus obliquus	49666	14923928	800461	0	0	0	11333	3611	98392	589564	0	60077	0	9364456	2472613	28374101	107715903	01_Alage
41	Tetraselmis striata	12326477	16859716	13143115	13856	62222	0	78922	167697	1241219	8184066	26704	447078	136884	4642975	67475538	124806469	227954216	01_Alage
42	Picocystis	14462	196201	3623688	0	13319	0	72190	4705	0	1240027	140223	39859	0	139440	1788472	7272586	29646247	01_Alage
43	Ulva mutabilis	73227	7448237	15893211	144467	4675	0	0	0	92928	236328	0	38883	0	1290785	14028296	39251037	98484689	01_Alage
44	Ulva prolifera	63971	1459067	4513631	25220	126578	0	0	0	140640	980485	198565	45868	50149	1029813	12107307	20741294	87889290	01_Alage
45	Parachlorella kessleri	0	297208	50031	0	0	0	3534	0	27562	10360	0	86039	0	1074069	1534327	3083130	59187803	01_Alage
46	Helicosporidium	0	0	0	0	0	0	0	0	0	0	0	22460	1849	116270	233078	373657	12373820	01_Alage
47	Auxenochlorella pyrenoidosa	0	57738	14745	0	0	0	0	0	0	21696	0	277835	0	2382520	364686	3119220	56992954	01_Alage
48	Auxenochlorella protothecoides	0	14302	0	0	0	0	0	0	0	51181	2047	67399	0	366492	370381	871802	22924637	01_Alage
49	Micractinium conductrix	36903	2435654	918933	0	49618	0	0	0	138597	1211113	0	436660	0	4675653	2776511	12679642	61018900	01_Alage
50	Chlorella sorokiniana	0	589182	1145195	0	26716	0	0	0	0	195370	0	117098	0	2470597	1261337	5805495	58534920	01_Alage
51	Chlorella variabilis	0	482604	212465	0	0	0	0	0	16972	195528	0	250600	0	3073862	1184695	5416726	46159512	01_Alage
52	Chlorella vulgaris	0	236025	29833	0	0	0	0	0	0	40588	0	126305	0	1883233	437599	2753583	37342230	01_Alage
53	Prototheca bovis	0	0	0	0	0	0	0	0	0	144730	0	449837	67357	1843165	670795	3175884	24744895	01_Alage
54	Prototheca ciferrii	0	0	0	0	71216	0	0	0	0	64667	0	312330	0	1524579	633076	2605868	26448891	01_Alage
55	Prototheca cutis	0	92215	1432	0	0	0	0	0	0	19576	0	22029	0	343167	666806	1145225	19969220	01_Alage
56	Prototheca stagnorum	0	0	0	0	0	0	3303	0	0	0	0	152410	0	736523	464060	1356296	16896228	01_Alage
57	Prototheca wickerhamii	0	3186	270377	0	3934	0	0	0	0	0	0	40440	0	470852	430735	1219524	27691062	01_Alage
58	Prototheca zopfii	0	0	47282	0	5217	0	3748	0	0	82508	0	451765	7120	1841886	843271	3282797	24744895	01_Alage
59	Chloroidium	0	23226	0	0	0	0	0	0	0	0	0	79054	0	531382	346050	979712	54312065	01_Alage
60	Chlorella	0	104172	2949	0	0	0	0	0	0	67058	0	528467	0	3674075	546774	4923495	40934037	01_Alage
61	Picochlorum	0	14196	0	0	0	0	0	0	0	3697	0	14530	0	80869	100658	213950	13390658	01_Alage
62	Botryococcus braunii	398090	5098144	28516336	151077	0	0	49008	0	231282	15168779	117301	998292	781576	13683131	12178965	77371981	184381702	01_Alage
63	Coccomyxa	0	126240	42015	0	0	0	0	0	0	7149	0	13658	0	204087	511236	904385	48546496	01_Alage
64	Coccomyxa subellipsoidea C-169	0	783330	28430	0	0	0	0	0	0	375687	38286	19420	0	353466	1261808	2860427	48826616	01_Alage
65	unclassified Trebouxiophyceae	89456	293323	124315	0	0	0	1579	0	0	76876	0	116184	2068	1363484	1267571	3334856	44686223	01_Alage
66	Trebouxia	0	791345	509701	0	0	0	0	0	42874	17464	2694	39635	0	707720	2499334	4610767	69346529	01_Alage
67	Trebouxia gelatinosa	24919	297954	226076	0	0	0	0	0	34725	153486	0	14160	0	444796	1013331	2209447	61726235	01_Alage
68	Chlorokybus atmophyticus	366579	1375561	10401318	0	28821	0	74846	0	0	5233780	0	96332	52826	1791864	5648146	25070073	74330326	01_Alage
69	Mesostigma viride	297517	5939197	575855	127895	0	0	0	21643	10570	709457	0	286431	208	3630091	29059647	40658511	145898619	01_Alage
70	Klebsormidium nitens	76361	150628	654199	0	0	0	0	0	0	325111	35776	61420	0	385551	3097596	4786642	104209716	01_Alage
71	Chara braunii	3741620	91202493	276769668	3628067	3863187	0	3299555	923743	6942311	93244565	18377710	6446619	8030968	43106805	508307837	1067885148	1751211849	01_Alage
72	Mesotaenium endlicherianum	763448	779046	34181957	21403	1715	0	0	56216	17089	6119173	0	1055668	26296	5424912	21032861	69479784	173751473	01_Alage
73	Physcomitrella patens	0	9410464	248759948	0	4719	0	0	0	2435872	3142843	264148	1324000	57865	7240579	19885965	292526403	472081022	02_Bryophyte
74	Pleurozium schreberi	89757	1212363	3987849	59024	36864	0	0	88292	267886	9159740	86206	223612	172551	1118560	90343036	106845740	220032134	02_Bryophyte
75	Marchantia inflexa	0	1052505	21584930	59631	37163	0	0	72755	1217545	4725637	0	201587	17744	862681	36113671	65945849	208752592	02_Bryophyte
76	Marchantia polymorpha	45120	3562346	20265348	43631	67224	0	107848	0	812758	4635866	46602	419349	236	2069301	27016201	59091830	225760816	02_Bryophyte
77	Selaginella kraussiana	8845	4126127	5252279	108462	194702	0	0	27414	380203	2272373	89201	177493	0	890692	16876676	30404467	114502747	03_Lycophytes
78	Selaginella moellendorffii	0	2005055	63666416	239631	664500	0	69927	98911	2704293	15309170	910522	262576	121898	1671488	24119322	111843709	212501708	03_Lycophytes
79	Selaginella tamariscina	79294	6735619	78060491	1046641	1650551	0	81905	313470	501041	43512975	450658	653855	23130	6799950	59449640	199359220	300729260	03_Lycophytes
80	Adiantum capillus-veneris	0	209640042	1777500486	20571070	1036416	0	107894	769016	12742639	239923107	0	3118389	1234675	47882996	1047535366	3362062096	4484705891	04_Fern
81	Azolla filliculoides	0	41867909	277907867	713376	6602887	0	0	176235	1826494	26051973	3779680	702814	1047015	8273989	95037189	463987428	622592327	04_Fern
82	Salvinia cucullata	0	7591128	41397463	0	2703893	0	0	26160	527528	5017264	3604220	206760	774420	1641132	40288505	103778473	231846944	04_Fern
83	Gnetum montanum	0	133206235	2337818852	1978815	4702596	0	0	4954624	6444926	45163571	2697307	2868415	17128937	9357335	1143374493	3709696106	4072237404	05_Gymnosperms
84	Sequoiadendron giganteum	0	315731717	3632772122	15745681	825931	2153566	16675309	936218	14124028	562013088	3079540	10723256	21343280	44871979	1688161500	6329157215	8122132770	05_Gymnosperms
85	Amborella trichopoda	0	32725193	223624088	0	454183	0	0	135356	677077	120512221	264073	1960666	14661	10016097	23066271	413449886	706495326	06_ANA
86	Nymphaea colorata	407084	6836734	64468911	1187572	33088	0	108341	49868	2963974	35391602	2935733	961510	54259	5289471	39292088	159980235	409013923	06_ANA
87	Cinnamomum micranthum	108145	23132252	131743892	0	1580437	0	138815	48848	3402863	41674480	242349	2039459	870799	9651029	173358024	387991392	730416403	07_Magnoliids
88	Persea americana	4731	13920028	93956091	174249	295037	0	222161	164750	1206681	25278418	7781	1104190	1179207	4546292	107827987	249887603	446756492	07_Magnoliids
89	Liriodendron chinense	194361	38308132	767384172	0	132885	0	0	2313785	1820280	161406005	963437	2075469	21665	14834066	480002738	1469456995	1742421816	07_Magnoliids
90	Magnolia ashei	58323	12660858	38641311	0	52620	296042	0	54530	341245	29782941	40222	437393	189537	2045910	92310801	176911733	284511610	07_Magnoliids
91	Spirodela polyrhiza	11746	533913	12267390	60925	0	0	0	0	131083	1819094	0	474358	205231	2600180	10049423	28153343	136670443	08_Monocots
92	Zostera marina	0	9423197	48429875	55256	44056	0	0	0	218554	13516799	46291	354540	179787	1436271	47994015	121698641	203913826	08_Monocots
93	Dioscorea alata	117463	12645274	185632128	33493	51813	0	59441	0	2035451	35360892	654363	2171618	492305	22340203	106047171	367641615	620909442	08_Monocots
94	Dioscorea rotundata	152385	11149945	116773228	245420	137233	0	151154	0	1125325	32613915	44823	1462193	112949	7460738	59585296	231014604	456674974	08_Monocots
95	Trichopus zeylanicus	607615	3179981	132983944	0	2344649	0	0	2188218	3374781	119714662	1303444	1207116	346115	30448205	116656266	414354996	713406926	08_Monocots
96	Xerophyta viscosa	0	4475404	27245344	13392	492139	0	73012	398797	983341	27326694	81623	790205	689525	5693687	59690660	127953823	295462401	08_Monocots
97	Asparagus officinalis	0	19953119	605172928	91860	43748	0	918591	180104	8391053	56540956	0	1355446	15530	9827286	279425693	981916314	1187538024	08_Monocots
98	Apostasia shenzhenica	76746	14791856	39241085	0	111678	0	0	152355	306840	23110875	307014	1200138	570481	4776549	92926679	177572296	348733136	08_Monocots
99	Gastrodia elata	0	47900071	432062485	0	73940	0	0	0	5783003	85107185	338475	1239589	152778	7654258	319905252	900217036	1060984162	08_Monocots
100	Dendrobium catenatum	0	64163330	265958012	166431	1713916	0	0	95706	1286465	48556432	0	2277881	1840104	9526873	344314532	739899682	1104259548	08_Monocots
101	Phalaenopsis aphrodite	591656	39764507	350558005	0	31972	0	0	0	841326	41890021	0	1764632	14424610	8114417	229718842	687699988	1025096742	08_Monocots
102	Phalaenopsis equestris	449649	41956973	370330417	0	0	0	0	0	391869	49988868	0	2092345	3388296	8706044	257124836	734429297	1064200343	08_Monocots
103	Vanilla planifolia	0	70077837	284491452	487708	317691	0	0	0	236678	21892336	2237517	11639975	0	26796901	390542537	808720632	2203635484	08_Monocots
104	Cocos nucifera	0	10921562	860100515	0	388491	0	338871	673868	1025466	107330439	0	2381604	7358414	11969551	330403947	1332892728	1839172334	08_Monocots
105	Elaeis guineensis	697759	12237400	419649405	0	358862	0	406484	0	1332155	67543829	0	2047821	4358058	8111909	212368941	729112623	1535178229	08_Monocots
106	Elaeis oleifera	19415	14142701	449511290	0	637385	0	296129	475967	1852845	59567234	7562	1890000	6696982	7192730	153320807	695611047	1402729295	08_Monocots
107	Calamus simplicifolius	592653	87500419	826056076	2458514	495164	0	412260	0	7897876	163122301	1338879	2908916	7424958	13786236	308857330	1422851582	1960809755	08_Monocots
108	Ananas comosus	1347684	3787703	74027647	31912	8637	0	0	220792	889621	43038370	151267	1617278	250662	7350294	115541442	248263309	382055938	08_Monocots
109	Raddia distichophylla	0	14452589	116750092	36132	632217	2344452	0	141637	5170041	58942859	96642	875684	459469	5334180	91757104	296993098	580833421	08_Monocots
110	Leersia perrieri	0	5249500	30930992	0	669761	1210693	0	0	3315181	30930233	7065	392031	67522	2694772	6941210	82408960	266687832	08_Monocots
111	Oryza barthii	0	4718035	38545187	0	1027025	1170410	0	0	14267795	51826826	14768	492810	180454	3391498	5946205	121581013	308272304	08_Monocots
112	Oryza brachyantha	0	1150615	21137963	0	373249	242967	0	0	9619655	43767511	0	394795	37903	2789544	5291629	84805831	259907595	08_Monocots
113	Oryza glaberrima	0	4340644	44972070	0	683576	1170544	0	0	12635906	49555063	306191	503486	100683	3704169	7210203	125182535	303294962	08_Monocots
114	Oryza glumipatula	0	4276854	36145010	0	604845	1148199	19316	0	13660299	48368078	0	529264	106157	3952002	4337794	113147818	372860283	08_Monocots
115	Oryza longistaminata	0	4970732	48201190	0	1329930	935969	0	0	13866880	51254980	62686	565935	107384	4293944	4438107	130027737	362063720	08_Monocots
116	Oryza meridionalis	0	3953862	25632094	0	751239	1136108	18541	0	9994733	41029335	0	458743	52428	3391705	4668790	91087578	335668232	08_Monocots
117	Oryza meyeriana var. granulata	0	3963018	426320592	0	285530	236097	0	0	9901149	77270398	571079	708252	178074	4005762	39119300	562559251	776957456	08_Monocots
118	Oryza punctata	0	3778815	106735441	0	776526	1397327	0	0	9759260	58404914	0	520345	31017	3417134	7091341	191912120	393816603	08_Monocots
119	Oryza rufipogon	0	4546727	49310588	0	610301	1211466	0	0	13477087	56141800	0	560702	953688	4376962	4943712	136133033	339177042	08_Monocots
120	Oryza sativa	0	4466242	70605251	0	695695	1479956	0	0	13609306	63827145	99913	563831	1203535	5296283	13680101	175527258	382778125	08_Monocots
121	Oryza sativa f. spontanea	89842	4843312	37735989	0	767375	959135	0	0	14046813	51925463	8728	533135	111598	4128166	3632767	118782323	337950324	08_Monocots
122	Zizania latifolia	0	5074196	127535706	1154	157607	231074	0	0	1996746	51959139	0	694000	120560	4228851	39379809	231378842	603989347	08_Monocots
123	Brachypodium distachyon	122204	7157468	49250887	70244	317919	791734	21340	0	1476002	21893372	363334	315125	153812	1966967	20638516	104538924	271298618	08_Monocots
124	Dactylis glomerata	0	28025999	255121332	0	391608	5104930	0	0	1770384	59659049	0	567153	270985	3439722	131027959	485379121	839914838	08_Monocots
125	Lolium perenne	0	29534460	36763824	0	589174	4715191	0	0	976086	18957145	0	602719	141918	2920817	55057786	150259120	481479386	08_Monocots
126	Hordeum pubiflorum	0	41768782	617451961	0	1784495	7086488	0	78147	6456834	111350978	0	1198279	110917	8055211	217222552	1012564644	1425274558	08_Monocots
127	Hordeum vulgare	0	45573526	2953867451	0	944914	3739076	0	0	4055896	258359238	778092	2952270	23483352	12563464	169656681	3475973960	4006124924	08_Monocots
128	Aegilops tauschii	0	74118824	2515389041	0	375277	3488079	0	2592196	56016740	717053489	8374819	2740369	5287220	13706742	306272752	3705415548	4327321625	08_Monocots
129	Triticum aestivum	2955448	213207435	8959330579	0	570745	12052694	0	3982105	105188720	1873256980	910634	7081361	27360807	37057443	1193281315	12436236266	14547261565	08_Monocots
130	Triticum dicoccoides	0	150835540	6564707015	0	8168988	14270974	0	0	63433954	1264881487	0	4880644	24568539	27660330	866841184	8990248655	10494955245	08_Monocots
131	Triticum urartu	0	62496124	3123583333	1676584	464718	5428060	0	2622561	23356001	485423295	0	2603448	3950746	12447152	492988279	4217040301	4851895022	08_Monocots
132	Eleusine coracana	0	17431806	435397977	0	1133083	495200	0	0	2704017	62643970	217610	917359	263812	7288679	80603267	609096780	1195986209	08_Monocots
133	Eleusine indica	120827	9082833	143047086	0	630304	298084	0	0	1338563	28560558	0	399923	203693	2481749	39989350	226152970	492270386	08_Monocots
134	Oropetium thomaeum	8581	3739670	54504208	0	397580	0	0	0	2736458	14978513	219093	254104	0	2168590	26069683	105076480	243174629	08_Monocots
135	Eragrostis curvula	0	13230543	122937512	562132	1840477	643508	0	0	3823481	50557924	15425	555565	0	4654256	36802584	235623407	603072269	08_Monocots
136	Eragrostis tef	0	9086900	24117572	0	1946390	861552	0	0	1595908	24634138	17829	543848	0	4381076	23294644	90479857	607317615	08_Monocots
137	Sporobolus alterniflorus	0	13976981	107535232	0	727648	543300	0	0	2166433	22299223	0	233612	556184	1431163	32801054	182270830	365572975	08_Monocots
138	Zoysia japonica	0	4056009	64369716	0	621792	40339	0	0	1968194	28576041	0	308185	2000131	2578929	28292977	132812313	334384427	08_Monocots
139	Zoysia matrella	0	7472834	135015965	0	1044110	369399	0	84240	6325408	51461537	0	496559	3767548	3787648	30906671	240731919	563438595	08_Monocots
140	Zoysia pacifica	0	5893737	88601728	0	764231	99079	44643	0	1854661	34571240	0	351337	3104014	2694714	33269200	171248584	397009957	08_Monocots
141	Coix aquatica	0	7494945	1114668484	0	521958	149449	0	0	3835622	106302746	685919	921534	0	6382462	89206531	1330169650	1615469127	08_Monocots
142	Miscanthus sacchariflorus	0	18858830	513230535	0	1992194	1643323	0	0	9703551	116851223	0	938410	2815876	6218194	126917932	799170068	2074921001	08_Monocots
143	Saccharum hybrid cultivar	1610412	11246684	182650711	0	1082582	416137	0	0	2979209	55088375	196992	518739	890631	3782309	31939113	292401894	530659635	08_Monocots
144	Saccharum spontaneum	0	62626998	1251093173	0	5436570	4821632	0	858729	22871617	291525201	0	2811942	39505592	19975686	179204381	1880731521	3133290353	08_Monocots
145	Sorghum bicolor	56862	7279537	333921227	0	413212	94896	0	0	3658324	64827765	545418	511694	17150455	4809915	37724066	470993371	709344700	08_Monocots
146	Zea mays	0	14829841	1469309368	0	1365265	204672	0	0	11903445	98199009	0	862708	1032568	6302062	142123589	1746132527	2135083061	08_Monocots
147	Alloteropsis semialata	0	13384451	276442216	0	1217719	541091	0	60875	6365869	74557530	238793	616510	1382704	4123027	48460784	427391569	747771851	08_Monocots
148	Echinochloa crus-galli	0	26803914	296520912	0	2805725	4427048	0	134764	7087609	113707593	495612	1451717	7693073	12684862	74500633	548313462	1486609408	08_Monocots
149	Cenchrus americanus	0	24939783	999285632	0	2105100	1051412	0	0	3644344	88473520	0	807223	67372	5391068	126099440	1251864894	1816949023	08_Monocots
150	Setaria italica	0	6151681	105557945	0	527199	1092017	0	0	3018562	41840730	0	441024	420563	3187416	32144757	194381894	405868399	08_Monocots
151	Setaria viridis	0	5747366	110430588	131028	196485	967728	0	0	2835686	40282162	0	458236	1376711	3087607	22727140	188240737	395731502	08_Monocots
152	Dichanthelium oligosanthes	0	3476119	170710701	0	349942	52667	41511	0	1714309	39910440	0	418331	19115	3754289	62688802	283136226	589166415	08_Monocots
153	Urochloa ruziziensis	0	11499734	211854182	0	1419186	2071777	0	0	3068573	60541800	0	630101	248586	3632942	36732282	331699163	732531281	08_Monocots
154	Panicum miliaceum	0	9143559	312184844	0	980889	897437	0	0	2953270	43350352	58823	856833	18740465	5981920	73096603	468244995	848351880	08_Monocots
155	Panicum hallii	0	2846590	273580445	0	438352	617319	0	0	759147	28437888	234325	444943	4828188	3199109	41679748	357066054	535889049	08_Monocots
156	Eichhornia paniculata	119041	13240515	108130054	0	54561	0	0	29386	734208	20817197	128044	1184518	116463	7631229	143102623	295287839	571388321	08_Monocots
157	Musa acuminata	0	4542220	129967359	0	266565	0	0	209975	101288	9369689	5146	721449	107120	4123183	50831341	200245335	472231289	08_Monocots
158	Musa balbisiana	0	5159490	192601922	911516	1036851	0	95106	0	1186391	17202720	6320722	823370	74987	12588780	46792067	284793922	492775286	08_Monocots
159	Musa itinerans	0	4256995	116304395	21226	347866	0	0	0	305710	9297676	149813	827478	108714	4448637	42470907	178539417	455349267	08_Monocots
160	Musa schizocarpa	305023	9355887	246017145	17927	397930	0	0	0	64133	16424079	5429098	747785	1601640	5843378	45648041	331852066	525283493	08_Monocots
161	Berberis thunbergii	124786	92512945	583513728	0	6847336	0	1078324	0	12241423	185918730	1558575	4063690	0	16627193	450160831	1354647561	2240736797	09_Base_eudicots
162	Eschscholzia californica	486354	17263759	81080018	256992	2055615	0	38917	638782	2262262	20814723	96145	1097024	585413	4212448	103292999	234181451	489064912	09_Base_eudicots
163	Macleaya cordata	0	7434765	63920342	0	273919	0	308061	221484	1621835	23159027	0	1150820	599140	4315105	84056076	187060574	377833576	09_Base_eudicots
164	Papaver somniferum	0	127690661	1126955852	0	1167954	0	683220	1390655	5044178	148275392	66363	2552853	2491017	33453960	641105256	2090877361	2715530335	09_Base_eudicots
165	Aquilegia coerulea	0	9551853	55443299	0	722216	0	29921	26552	2119255	14500617	246107	574440	213068	2880076	57369081	143676485	301979693	09_Base_eudicots
166	Nelumbo nucifera	0	51508950	181053774	0	1236300	0	236815	58008	769615	62714939	20409	1557268	158969	6561019	125692657	431568723	804647751	09_Base_eudicots
167	Macadamia integrifolia	0	43059971	212321526	113937	2683099	0	70176	948973	1368847	30481573	1952683	3210001	603880	9117053	132247451	438179170	744636076	09_Base_eudicots
168	Kalanchoe fedtschenkoi	0	4739021	22471395	0	16801	0	0	0	881199	20918698	133177	439010	460536	1639303	56641253	108340393	256351415	10_Super_rosids
169	Sedum album	33322	4778951	51354753	200843	261703	0	84983	43100	969713	14318400	491668	343698	276361	1526910	56262459	130946864	302250854	10_Super_rosids
170	Cissus quadrangularis	0	5204284	26508570	0	19620	0	0	0	399656	3080756	7117	776146	93424	2414009	26942762	65446344	281703610	10_Super_rosids
171	Vitis aestivalis	0	14346308	35616734	0	9441	0	0	0	957533	3775389	69981	1905697	8941	6053143	136396055	199139222	432755284	10_Super_rosids
172	Vitis cinerea x Vitis riparia	0	24244151	99901359	0	369982	0	0	0	1964008	39053825	53784	2321403	90540	7407194	38228211	213634457	539624286	10_Super_rosids
173	Vitis riparia	32928	23671099	141418172	36411	71390	0	0	80885	1995759	44319848	0	1865467	0	6763840	36477087	256732886	500105807	10_Super_rosids
174	Vitis vinifera	66597	21598378	122794764	0	102456	0	0	0	1648948	41008604	39112	1735490	2536625	7250357	41664014	240445345	486196837	10_Super_rosids
175	Vitis x labruscana x Vitis vinifera	71477	23690754	142410243	0	46210	0	0	0	2244424	37391527	209425	1657414	1087415	5973635	30882669	245665193	490143216	10_Super_rosids
176	Aristotelia chilensis	0	654205	746533	0	0	12454	0	0	33880	537859	0	284928	0	1051658	3445043	6766560	96354398	11_Fabids
177	Cephalotus follicularis	0	33983508	928365857	4412102	264966	0	2808174	18170541	151448	79393900	0	1291519	876094	6542523	509295517	1585556149	1614517073	11_Fabids
178	Populus simonii	0	5038939	86238327	740	2706050	0	0	0	33438121	30278643	850337	1314277	809167	5312421	41563882	207550904	441407051	11_Fabids
179	Salix brachista	12685	1890816	64166682	0	7919111	0	75607	0	20374758	18938696	134989	948747	0	4984402	31493116	150939609	339587529	11_Fabids
180	Caryocar brasiliense	0	2529869	34242882	50590	0	0	124456	0	44324	3466826	15604	827814	25061	2552533	24287899	68167858	212172521	11_Fabids
181	Ricinus communis	244831	740226	94711450	66114	275784	0	0	0	525603	12308246	1383471	1116636	33505021	4245748	41490727	190613857	350621860	11_Fabids
182	Jatropha curcas	0	6226289	60497382	12551	72259	0	0	0	1321338	16212218	63564	1078839	0	4346687	37328306	127159433	318527106	11_Fabids
183	Manihot esculenta	1944533	5552850	199917852	30816	29665	0	0	0	298825	21150590	0	1747113	0	5576086	89362115	325610445	582278977	11_Fabids
184	Hevea brasiliensis	337529	9837449	903198243	0	133761	0	0	0	168187	17611608	62995	2463694	0	11666105	159433531	1104913102	1373527118	11_Fabids
185	Linum usitatissimum	0	9312876	39492174	32755	47242	0	63087	8786	648971	14036754	53063	500250	182208	2102440	29396205	95876811	316167074	11_Fabids
186	Passiflora edulis	0	5198048	12966967	0	66960	0	0	0	136484	1845589	9563	329673	0	1161993	27876139	49591416	165656733	11_Fabids
187	Rhizophora apiculata	351712	2142762	39824817	0	584756	0	0	0	844205	3016927	318364	1190846	1299617	8131023	24017981	81723010	232055149	11_Fabids
188	Populus alba	0	4774458	85923320	99383	2363009	0	41028	0	25370437	24060385	285403	1355034	114244	5771617	32976213	183134531	416960588	11_Fabids
189	Populus euphratica	147416	2743637	135929163	0	2115813	0	0	218938	23049465	24610833	837557	1508514	88026	6159105	31093875	228502342	496032534	11_Fabids
190	Populus trichocarpa	0	4177497	79909014	0	2561838	0	82626	0	35312892	29738947	117013	1231097	2921606	4811875	35077830	195942235	434289848	11_Fabids
191	Glycine tomentella	0	25108979	497563641	0	3629668	0	7602974	67281	2370674	109739826	42643	5843121	0	22394748	187365941	861729496	1694090375	11_Fabids
192	Carpinus fangiana	0	15523757	57410828	28332	421181	0	0	85644	1173890	18570270	44716	1296233	166079	5332757	67346882	167400569	381948906	11_Fabids
193	Chamaecrista fasciculata	0	11358634	88221746	84157	1071198	0	0	0	2379711	28755022	92768	1203673	32792	5923665	89906448	229029814	429102545	11_Fabids
194	Vachellia collinsii	0	10735147	55901506	0	373167	0	90401	141503	3171960	47904457	12232	1116101	648705	4923581	85639500	210658260	461064704	11_Fabids
195	Mimosa pudica	0	9677330	54370320	0	2636379	0	0	0	2469311	20532026	16607	1234200	341360	5178187	142307791	238763511	557202335	11_Fabids
196	Prosopis alba	51042	7870790	146641607	0	286315	0	0	0	3741987	40707497	472701	1625158	57215	6686191	160411426	368551929	707161903	11_Fabids
197	Cercis canadensis	45241	4201844	53792054	95457	111620	0	0	0	2443455	12441093	116766	886884	355723	3284554	47353230	125127921	329325136	11_Fabids
198	Nissolia schottii	0	10698927	76829388	0	350379	0	837774	263759	1253786	30048913	196832	1296521	2850736	6024056	134556725	265207796	466098644	11_Fabids
199	Arachis duranensis	0	13526748	509720855	0	2003974	0	0	78754	2598741	43491284	0	4164146	506144	9671119	98321262	684083027	1084261490	11_Fabids
200	Arachis hypogaea	0	32581548	1492180352	885376	4395291	0	271338	345796	7801624	102716510	138943	9043128	0	28466289	233334505	1912160700	2557073284	11_Fabids
201	Arachis ipaensis	0	17281262	732839973	0	1913064	0	0	0	2385040	51977600	0	4304273	0	10730496	134668217	956099925	1353504219	11_Fabids
202	Arachis monticola	0	36879119	1365017711	375697	3212081	0	0	4319845	5815974	99603598	276001	8372465	0	28595926	196564242	1749032659	2618653824	11_Fabids
203	Lupinus angustifolius	0	14627482	168267991	0	1594889	0	0	0	1815632	36066200	395649	1068459	285882	13318708	126549099	363989991	609203021	11_Fabids
204	Cicer arietinum	0	5463518	133778525	0	52149	0	135834	80910	631763	39814331	214696	1544274	13480254	6855464	88474135	290525853	530893862	11_Fabids
205	Cicer echinospermum	0	10474779	231489634	30475	126783	0	219202	407502	2546637	67054287	134954	1880411	19009948	8891261	82166849	424432722	657413940	11_Fabids
206	Cicer reticulatum	0	13753202	86919189	0	138036	0	0	0	516569	32653442	18603	1356047	4545024	5679559	68591494	214171165	416688137	11_Fabids
207	Vicia faba	53095	1107785	3838155	6579	59182	0	35072	31731	377487	2534767	8315	184497	8146	680040	9641144	18565995	80362707	11_Fabids
208	Medicago truncatula	369724	17657879	58633836	0	1891705	0	0	139354	5406214	40238697	186341	1122488	248290	4474300	40822446	171191274	412924424	11_Fabids
209	Trifolium subterraneum	41676	13696105	81147781	73459	1538918	0	0	53702	6235210	31257241	19321	1136883	129706	5108301	75181004	215619307	471834188	11_Fabids
210	Lotus japonicus	0	13332356	57514344	0	819188	0	0	0	2711372	22494796	0	1063072	457077	4030987	58350227	160773419	394454697	11_Fabids
211	Abrus precatorius	0	7005263	59269457	0	262685	0	0	109365	1072949	15917652	4141174	1605917	157641	5295416	55292208	150129727	347230236	11_Fabids
212	Cajanus cajan	769387	5553941	121284914	2297786	159286	0	576647	0	2356087	31429823	16738	1929996	1636200	8032097	163200682	339243584	592970700	11_Fabids
213	Glycine max	0	13496464	330436242	8590	1572297	0	110997	0	2292418	55660744	469075	2931920	12614320	11849172	73881924	505324163	979046046	11_Fabids
214	Glycine soja	182989	11295718	355674720	0	899593	44409	1450779	0	2545047	57963163	65364	3081573	7758191	12270715	88105354	541337615	1013766566	11_Fabids
215	Mucuna pruriens	0	2846448	64982271	170960	336214	0	205466	0	243091	11900806	0	1880842	182320	6270106	96026821	185045345	397042285	11_Fabids
216	Phaseolus vulgaris	408497	13880141	142176797	0	24122	0	0	0	2251997	17186649	0	1658082	176325	6488124	92904766	277155500	521076696	11_Fabids
217	Spatholobus suberectus	0	12909014	157882981	641397	1196484	0	103148	0	4468943	92763541	425307	2656228	0	10636880	185353904	469037827	798470440	11_Fabids
218	Vigna angularis	0	2978948	79437008	59953	109507	0	0	99385	618657	19458989	157302	1817481	139951	11331417	100950549	217159147	467300602	11_Fabids
219	Vigna radiata	0	932264	99945003	0	32801	0	0	0	691079	18841754	102636	1845762	82020	7127837	80150382	209751538	463637892	11_Fabids
220	Vigna unguiculata	0	2112221	129875909	0	88683	0	0	424773	4774145	46137341	1145167	2065974	248396	11478652	86765916	285117177	519066764	11_Fabids
221	Quillaja saponaria	25827	4379621	12927666	0	74363	0	0	29643	497569	2590380	27953	862886	260044	3076548	50911582	75664082	248908185	11_Fabids
222	Cannabis sativa	111164	43655120	611903830	0	122176	0	319127	395370	619747	37972523	0	2270039	90428	10866389	141301897	849627810	1009674739	11_Fabids
223	Humulus lupulus	0	39403597	908651766	246024	695937	0	0	1025143	2488711	89800100	0	2953001	0	13490084	477509926	1536264289	2049208583	11_Fabids
224	Parasponia andersonii	0	3333064	144195485	0	36788	0	0	200447	1640209	28833524	0	1386080	291106	6111733	100024278	286052714	475834238	11_Fabids
225	Trema orientale	0	3479331	76285027	0	35563	29869	6673	530353	1789521	26800779	0	1514660	64044	6131660	73689706	190357186	387958189	11_Fabids
226	Artocarpus camansi	0	5693894	180106712	474734	125377	0	0	0	465525	27229086	114038	2585052	260279	9472928	112896957	339424582	631307653	11_Fabids
227	Ficus carica	0	602449	13055630	29357	49128	0	0	71781	948402	8237306	14351	1596852	51647	7214444	41470989	73342336	247090738	11_Fabids
228	Ficus erecta	124814	5353190	104687276	0	1145602	0	408306	0	6910658	69339015	1233052	3992748	183357	17677732	82873702	293929452	595834738	11_Fabids
229	Morus notabilis	0	2216280	64869800	98155	86744	0	202839	30338	2865583	20204789	48748	1558510	3096	6736399	51489687	150410968	320378613	11_Fabids
230	Ochetophila trinervis	0	7895811	58800583	200953	0	0	0	63804	1332003	32358985	12731	1413849	44966	5214709	58184732	165523126	309116026	11_Fabids
231	Ziziphus jujuba	0	6202675	105522706	648508	460207	72466	123798	327653	3506937	22840152	834953	2575598	128513	11609669	56698093	211551928	437753511	11_Fabids
232	Prunus avium	37171	3337579	34467689	75865	721408	42178	0	15139	1706707	18807045	36050	762002	0	3249052	37163973	100421858	272361615	11_Fabids
233	Prunus dulcis	0	1573237	42777537	0	605854	45121	0	0	991207	24668854	54794	682976	56501	3047703	18736954	93240738	227599157	11_Fabids
234	Prunus mume	0	1790807	26738588	0	603222	0	45837	44595	1153975	18187104	28862	716754	12821	5356293	27467187	82146045	234030239	11_Fabids
235	Prunus persica	0	2776111	36975339	0	344687	0	32794	0	965594	26489801	417249	680775	419082	2924434	21695204	93721070	227569171	11_Fabids
236	Prunus yedoensis	0	4471185	49905202	46942	1088574	10322	40487	114354	2641860	37005601	1064727	925953	486780	3842419	41783758	143428164	319209792	11_Fabids
237	Malus baccata	16283	19873525	203526823	0	3509190	377482	0	0	3299718	59533775	112481	1422743	63023	5756313	46686695	344178051	674411566	11_Fabids
238	Malus domestica	0	25720958	213635712	0	4426593	452068	20481	38982	4482165	73585850	69354	1644573	135951	6266528	47804200	378283415	1874765253	11_Fabids
239	Pyrus betulifolia	0	6171289	145838297	225990	3280423	411303	0	0	3091967	48768463	169480	1214575	0	5272741	27626029	242070557	532747033	11_Fabids
240	Pyrus x bretschneideri	111619	5265589	155376633	0	3205543	380378	0	0	2940355	49860885	561504	1214743	31522	5698605	31925046	256572422	508550595	11_Fabids
241	Pyrus ussuriensis x Pyrus communis	0	6533910	185756175	0	4203522	382724	0	0	3245563	51168815	58022	1187675	21616	5078987	24118381	281755390	510637391	11_Fabids
242	Dryas drummondii	0	1994309	25894709	0	251767	0	288536	58090	606110	22356637	94552	762984	858038	3536706	31224628	87927066	225547060	11_Fabids
243	Purshia tridentata	0	3300018	17644716	0	53394	0	22849	33658	998892	11497060	62273	621592	116677	2520966	19754518	56626613	175970657	11_Fabids
244	Geum urbanum	0	26895865	434080203	352503	147653	0	0	0	7672145	160835835	836641	1374670	4020567	7509644	176116194	819841920	1217035493	11_Fabids
245	Fragaria nubicola	947417	3572558	19310848	0	453722	12583	0	0	1305877	17259645	13401	488978	331861	2152714	15393082	61242686	203686407	11_Fabids
246	Fragaria orientalis	1525189	3834612	20211115	1568	477050	35848	0	163430	1276187	18180162	13440	482695	416743	2029287	19971985	68619311	214184023	11_Fabids
247	Fragaria vesca	31301	3204951	21505393	79800	424464	30708	493122	0	869806	18304009	40459	494399	265591	2192717	12674771	60611491	214373013	11_Fabids
248	Fragaria x ananassa	3206902	11722904	149192821	0	1928703	0	280906	0	1319256	69810359	30217	1247542	240784	5548327	60495138	305023859	697762269	11_Fabids
249	Rosa chinensis	79637	15160753	146748004	0	733015	0	0	54510	2392913	38184633	127508	1135182	912388	5185985	69068692	279783220	513854168	11_Fabids
250	Rosa lucieae	51590	21292209	228068340	154366	773425	0	0	52691	5025779	68483671	708785	1617033	2063394	7319003	102354908	437965194	786105075	11_Fabids
251	Rosa x damascena	53499	24277546	187729408	289082	1198659	0	0	0	3709219	54272351	32716	1460041	1721710	6155061	79446948	360346240	711719955	11_Fabids
252	Boehmeria nivea	0	2727111	46223057	0	68018	10092	0	0	1103073	12299073	93996	1398518	43451	24759655	73530123	162256167	344616830	11_Fabids
253	Begonia fuchsioides	0	17471433	85051955	0	15414	0	0	0	537364	18531355	909702	839700	682663	9412590	65783287	199235463	373914052	11_Fabids
254	Benincasa hispida	0	14916358	546528255	0	1056090	0	0	1067915	0	57581383	160047	1943722	1256087	7008985	124239636	755758478	912951219	11_Fabids
255	Citrullus lanatus	0	4862436	57073079	0	669936	0	447122	0	93488	12901807	42748	1550689	637478	5566093	106753855	190598731	321046825	11_Fabids
256	Cucumis melo	288390	3816214	67249682	0	309690	0	0	49458	606895	35142050	209511	1316535	600426	5023788	67925529	182538168	374928489	11_Fabids
257	Cucumis sativus	0	6524440	29008137	163343	277551	0	0	30035	344541	10095027	214559	1196204	629811	4162029	38500901	91146578	226211662	11_Fabids
258	Lagenaria siceraria	0	6419412	50133399	0	1007120	0	0	0	195526	18230998	129586	1320414	494539	5652207	90773128	174356329	313386576	11_Fabids
259	Cucurbita argyrosperma	0	1651456	39159842	0	1635875	25625	0	0	379951	4942585	682649	1150308	55383	4710347	30132023	84526044	230033826	11_Fabids
260	Cucurbita moschata	0	2203415	64063235	0	5373898	0	0	284013	1556227	4689300	414711	1094394	1154370	7830676	41220416	129884655	269943085	11_Fabids
261	Momordica charantia	275911	5911912	33866757	0	263730	0	0	0	229824	4111467	134260	967666	373434	3183706	85077500	134396167	285613949	11_Fabids
262	Datisca glomerata	0	24072791	244239732	0	455901	0	122752	147283	4022563	57962922	1104538	3267756	6574318	9115714	137538973	488625243	688404099	11_Fabids
263	Alnus glutinosa	78709	24443195	85845421	0	588675	0	0	566453	1702442	28430201	54333	2069746	519834	8843548	155894276	309036833	611874127	11_Fabids
264	Betula nana	0	18733905	43920049	0	201413	94022	12804	0	1647589	25232948	99260	2039049	30758	8070499	108961543	209043839	564011153	11_Fabids
265	Betula pendula	572017	22591931	56239006	47154	54932	46059	0	60413	1517139	21025207	149917	1618651	179024	6196338	108287934	218585722	435914794	11_Fabids
266	Casuarina equisetifolia	0	7172958	49357370	154298	55531	0	0	389389	3082895	2482977	459647	614399	45568	2321391	32902262	99038685	301458157	11_Fabids
267	Casuarina glauca	11317	5664467	28097565	0	25423	0	0	31773	2317769	149609	245067	632356	0	2247128	52340384	91762858	282810774	11_Fabids
268	Castanea mollissima	0	26106168	180830210	0	693369	0	0	368569	4134642	43525002	231762	2702248	271191	13492210	164929570	437284941	833240550	11_Fabids
269	Fagus sylvatica	82606	15838166	49617749	70564	1338512	0	0	29335	2177878	16988609	725736	1747663	242428	7996681	81499051	178354978	428199988	11_Fabids
270	Quercus lobata	261680	49931561	214894844	0	436694	0	27353771	0	6677682	63997946	3637699	4763354	1360353	24604495	320843890	718763969	1277008906	11_Fabids
271	Quercus robur	1305051	29984818	160278723	40199	342182	0	6744238	62039	4397160	39196357	44127	2964676	663173	14218143	194090996	454331882	814336181	11_Fabids
272	Quercus suber	1428354	39210200	185482537	251322	1791026	0	4315896	0	2701182	41660398	118275	3608761	470861	17195636	216786923	515021371	953298670	11_Fabids
273	Juglans cathayensis	0	40617440	78397568	0	643704	0	44862	350550	2740549	34246198	0	1460800	226784	7333258	149751765	315813478	600151230	11_Fabids
274	Juglans hindsii	164887	34246444	77727642	83369	772157	0	73028	0	2407466	32472715	117900	1516000	251356	8372883	150633368	308839215	611108796	11_Fabids
275	Juglans mandshurica	0	37979224	76889182	0	586041	0	0	345792	2293236	27926320	0	1595030	1178729	7471132	136969218	293233904	558070702	11_Fabids
276	Juglans microcarpa	24884	47948783	102227515	0	968757	0	0	269116	1946207	43847678	299535	2365639	140476	11822705	236401140	448262435	913972398	11_Fabids
277	Juglans microcarpa x Juglans regia	0	44196889	73464527	0	842473	0	179955	477392	3917026	44376353	0	1356614	1684736	7488520	115169678	293154163	534671929	11_Fabids
278	Juglans nigra	358184	38037091	77044648	149942	1114069	0	0	235703	1124765	33768091	265018	1564392	30422	7869288	147914882	309476495	620766650	11_Fabids
279	Juglans regia	0	43092423	82764801	20575	809433	0	0	379848	2100541	40834838	2886903	1850928	6436470	10264372	169140748	360581880	699672627	11_Fabids
280	Juglans sigillata	0	40442643	73806876	0	680623	0	0	11519	1757348	32304752	0	1617421	217277	8215821	141452277	300506557	648117419	11_Fabids
281	Pterocarya stenoptera	0	59838972	108115194	0	1436633	0	0	467551	4862217	51290336	2797763	2554771	767922	11930143	213923935	457985437	955600900	11_Fabids
282	Morella rubra	52536	6234751	35786656	142375	402470	0	124478	97997	1907874	24044278	200339	712625	5237	2576129	54550666	126838411	313019583	11_Fabids
283	Punica granatum	53198	3110008	44279347	48939	724227	31267	76168	0	2362809	11243094	50430	660647	469497	4298139	72942584	140350354	296383220	12_Malvids
284	Eucalyptus grandis	0	16008005	142338978	0	840846	0	70230	0	5256498	56615375	19803	1204626	588389	6376738	91899330	321218818	691429809	12_Malvids
285	Eucalyptus melliodora	9162	15588107	158952793	0	669263	36383	247042	141844	4058256	58590519	690313	1327285	404776	6747134	70843344	318306221	643228284	12_Malvids
286	Eucalyptus pauciflora	0	12391695	132936712	0	1293126	0	132500	102162	6925217	64478637	296698	1178409	625047	5286915	73154032	298801150	594528099	12_Malvids
287	Gossypium darwinii	0	26270584	1375617228	0	0	0	0	0	2223075	84842230	1896143	4561729	540599	13922327	208233298	1718107213	2182957963	12_Malvids
288	Gossypium mustelinum	0	25679639	1518496310	0	0	0	0	0	1238171	80087981	891361	4665630	0	14348851	233875741	1879283684	2315094184	12_Malvids
289	Gossypium tomentosum	0	30416132	1411022392	0	193144	203371	0	0	655572	69450266	3322572	4848212	0	14016028	189630831	1723758520	2193557323	12_Malvids
290	Gossypium turneri	0	13279027	393523599	0	7969	0	0	0	1486592	40466346	85398	1876208	0	6393202	73139342	530257683	755203240	12_Malvids
291	Metrosideros polymorpha	18494	3627979	34517482	0	396137	46943	0	65527	1208412	40067079	368420	529790	194980	3005691	44818360	128865294	304365553	12_Malvids
292	Rhodamnia argentea	12460	3156521	68375911	0	464361	0	0	12342	2244286	41249476	579594	721981	679290	4242987	43330302	165069511	414815504	12_Malvids
293	Psidium guajava	0	10106561	88872710	0	429725	0	0	223423	2095563	37464469	231196	584721	2588145	2704906	62475963	207777382	386852394	12_Malvids
294	Syzygium oleosum	66277	4904362	86346093	64402	433507	0	0	0	2050198	44477530	209377	663312	78979	3342782	44083963	186720782	431290611	12_Malvids
295	Azadirachta indica	0	1853494	31773135	44085	54282	0	0	0	2092091	13255080	121382	983769	25870	4327534	38941882	93472604	261457759	12_Malvids
296	Atalantia buxifolia	0	5108777	54741252	145421	144180	0	146290	324361	1830819	17221780	50439	781816	14719	3563330	51313147	135386331	315806082	12_Malvids
297	Citrus cavaleriei	0	6491727	68889168	0	297525	0	0	333402	2140144	19097737	22072	945959	71854	4162821	53513756	155966165	357621245	12_Malvids
298	Citrus clementina	0	5502826	70023925	19794	134225	0	152416	344901	1936500	18951517	43130	715728	235658	11058382	45782634	154901636	301364702	12_Malvids
299	Citrus hindsii	0	6283292	84097872	235912	332068	0	52598	587306	2544710	22686574	146101	970317	505966	4232863	54666615	177342194	373170204	12_Malvids
300	Citrus maxima	0	5783373	92545295	318493	654001	0	115650	196621	3134404	21677365	5973406	834498	723733	3915421	46887256	182759516	345757338	12_Malvids
301	Citrus medica	40737	5794790	95581136	0	70659	0	49341	283052	2310782	21607865	65958	932993	0	6369525	47083297	180190135	406057947	12_Malvids
302	Citrus reticulata	303843	5111300	52845030	0	842	0	0	0	2703507	7068669	44444	882336	314696	5733758	95186959	170195384	344273335	12_Malvids
303	Citrus sinensis	70032	5433778	65559239	157440	112328	0	19463	141087	2251013	18332625	65862	765091	334515	3910102	56454994	153607569	327829540	12_Malvids
304	Citrus unshiu	0	5111021	70404055	0	124893	35487	0	335318	2037646	16390196	17844	917134	499422	3914233	55276696	155063945	359652061	12_Malvids
305	Citrus x paradisi x Citrus trifoliata	69986	5896459	42104735	27153	88122	0	0	32308	1419936	11857731	6437	737999	6140	2778414	36805729	101831149	265533993	12_Malvids
306	Acer yangbiense	137017	18188045	269511289	0	800631	0	0	330964	2815387	50938531	0	2027063	0	10993465	116936652	472679044	665887899	12_Malvids
307	Xanthoceras sorbifolium	0	23072677	150571079	106919	283826	0	0	825514	1103343	36643590	350172	1478369	230464	7204236	124613943	346484132	504383062	12_Malvids
308	Herrania umbratica	0	2048676	43560111	58816	0	0	0	0	580300	9477191	0	664095	0	2082790	31062981	89534960	234039246	12_Malvids
309	Corchorus capsularis	0	8973318	72332433	0	46132	0	111290	0	1659590	17434011	254894	846910	645399	3284582	56812715	162401274	317178409	12_Malvids
310	Corchorus olitorius	0	7346229	80082945	0	54893	0	0	51473	1184411	13433243	186378	854143	328276	4214801	54899645	162636437	334911943	12_Malvids
311	Durio zibethinus	0	15643733	208973677	0	29033	0	0	740717	9627909	31286753	3745050	2658071	1564671	8263131	112774695	395307440	715230256	12_Malvids
312	Gossypioides kirkii	427904	13742533	205893721	0	41621	0	0	88609	1727501	27224077	2067619	1504185	117613	4684269	72778054	330297706	528714955	12_Malvids
313	Gossypium arboreum	0	13297495	1043659305	0	106851	0	0	0	0	28770288	447737	2706462	0	9043235	169021900	1267053273	1694597732	12_Malvids
314	Gossypium barbadense	0	26655600	1237590033	0	0	0	0	944384	597955	75504997	2280846	5138965	0	20777332	252248002	1621738114	2566742836	12_Malvids
315	Gossypium hirsutum	0	23099900	1299826609	0	552960	0	684526	763361	1330550	60133219	689579	4384840	0	14201056	249706627	1655373227	2189140010	12_Malvids
316	Gossypium raimondii	2707	12145854	348737581	0	828551	0	96234	232561	1067595	41446212	733974	1897897	129567	6387733	92315664	506022130	761565430	12_Malvids
317	Gossypium thurberi	0	9405462	229841368	0	369153	0	0	0	96589	20871633	124184	1485863	0	4966345	78115040	345275637	582006748	12_Malvids
318	Hibiscus syriacus	631429	40459768	665061921	0	2148578	0	433722	568399	1434281	105461274	0	3561260	3369779	13416171	364086535	1200633117	1748252795	12_Malvids
319	Kokia drynarioides	0	13109583	196560799	111045	221703	0	33732	0	515311	19421459	38598	1518589	0	4673771	73757001	309961591	517429527	12_Malvids
320	Aquilaria agallochum	0	14075298	230198445	0	137542	476829	0	1308889	3124827	49995107	217071	1021861	128076	4093235	153211501	457988681	726710453	12_Malvids
321	Aquilaria sinensis	307180	10683188	250313948	126389	187745	307660	47492	0	2265775	41997699	546775	1070784	0	5052554	170907080	483814269	699794123	12_Malvids
322	Aethionema arabicum	0	3375507	22512473	172278	89622	0	120046	80377	919963	11851320	0	899618	65647	3351689	19178279	62616819	192487774	12_Malvids
323	Arabis alpina	0	11502332	79921241	10390	674751	141190	47976	103920	6331565	24281897	41837	567428	513674	2045593	40329223	166513017	311642060	12_Malvids
324	Arabis nordmanniana	0	8204869	34459513	0	864177	107576	34859	173157	2083958	14202835	0	1009236	110419	4090229	22384053	87724881	342306570	12_Malvids
325	Aurinia saxatilis	209988	18916821	77239269	0	551903	122467	25183	38941	3095721	23032136	25311	597859	388152	2509480	51516914	178270145	316420398	12_Malvids
326	Odontarrhena argentea	0	5006284	11003375	0	360011	63029	68125	98055	1562560	8325047	5815	635858	119866	2578733	18566355	48393113	183186458	12_Malvids
327	Anastatica hierochuntica	0	33696035	201572212	117573	1669282	357323	298681	0	4457577	45826589	141182	1060752	357391	3589873	61732939	354877409	542343195	12_Malvids
328	Biscutella auriculata	0	14185833	75587132	405093	385848	371873	0	0	1112028	46964383	9591	1098790	39948	3572530	71339372	215072421	384769842	12_Malvids
329	Biscutella laevigata	0	12769925	59235977	0	853669	50405	0	0	1726078	31303633	0	879769	90690	2992029	60608298	170510473	333609385	12_Malvids
330	Boechera puberula	0	3660832	20280556	33413	218784	21223	0	78578	2114442	12074793	6734	651189	50315	2434080	14661980	56286919	182592028	12_Malvids
331	Boechera stricta	0	3562935	20372906	0	233744	0	20267	21509	2211239	11279232	22262	536386	5266	2088596	13328800	53683142	188794588	12_Malvids
332	Schrenkiella parvula	0	2702208	9710160	0	276034	22079	100815	32855	1206317	5248156	2704	513824	0	1642536	6224716	27682404	137073209	12_Malvids
333	Brassica cretica	0	15928941	75181112	0	1409819	58105	0	0	2844695	36258482	0	984035	2215738	3888364	60104091	198873382	412521210	12_Malvids
334	Brassica juncea	538216	21741884	106582168	189231	2538613	43701	70152	134945	4332230	53461124	514798	2297734	764751	8390514	91365285	292965346	954861368	12_Malvids
335	Brassica napus	0	36558077	166814389	234239	4063199	238345	0	1356915	6776340	90823887	2189055	2248157	12532	8697704	106013658	426026497	976190593	12_Malvids
336	Brassica nigra	0	10166993	57724170	0	696634	34824	0	66038	2325433	27476628	15136	1023458	154	3894964	38839487	142263919	402144823	12_Malvids
337	Brassica oleracea	0	19378059	71819225	0	1347516	52429	0	51614	1954036	37162391	110387	1137289	735932	8035167	66780282	208564327	488954160	12_Malvids
338	Brassica rapa	55386	9299568	19010811	0	912373	23995	12857	0	1550131	18426325	156165	795274	546645	3050061	39904175	93743766	284129391	12_Malvids
339	Erucastrum elatum	0	12804958	26775669	14134	2006982	226569	0	0	6213767	27026938	44201	1107634	600539	3996056	41794512	122611959	362114105	12_Malvids
340	Raphanus raphanistrum	26404	8534851	18893464	110064	1223996	82252	0	0	1781691	17051514	14995	825228	607951	2872889	29845243	81870542	253833977	12_Malvids
341	Raphanus sativus	0	13300140	33478353	0	1512345	166136	0	62627	2643876	24743752	25732	1201132	1335847	4294025	45564641	128328606	426614037	12_Malvids
342	Arabidopsis halleri	0	5184156	14897229	21709	614063	150676	0	0	5307028	10945185	21862	536779	173538	1850258	10361469	50063952	196243198	12_Malvids
343	Arabidopsis lyrata	0	4744881	21169963	0	505090	146546	0	0	9549139	10601446	87492	595687	154011	2152844	11400904	61108003	206822858	12_Malvids
344	Arabidopsis thaliana	0	1135086	6774416	81380	137958	20411	0	0	2414457	3650941	34995	416752	686909	1385513	3088574	19827392	119668634	12_Malvids
345	Camelina sativa	66447	19340939	94158201	0	649408	171216	0	67355	17305898	30255374	0	1965390	2032072	7913675	43386313	217312288	641356059	12_Malvids
346	Capsella bursa-pastoris	64553	4080360	13393725	0	370093	75330	38586	25000	4175318	9897216	0	936057	5729337	3400899	11495219	53681693	268430517	12_Malvids
347	Capsella rubella	10278	1939713	7639191	0	193357	28004	0	0	2880821	4945493	11671	520584	1789054	1979853	5914877	27852896	133063876	12_Malvids
348	Barbarea vulgaris	0	2745548	14166826	0	335787	10842	23086	27200	1731057	5870669	0	625680	59934	2243682	9394627	37234938	167352128	12_Malvids
349	Leavenworthia alabamica	162602	2920016	17257521	0	600099	19671	0	27488	1216067	10511488	15164	591622	202158	2414745	10432454	46371095	173431618	12_Malvids
350	Nasturtium officinale	0	2647156	25162320	0	123246	0	0	0	697974	9515565	86257	742878	0	3031998	13291166	55298560	216122097	12_Malvids
351	Noccaea caerulescens	177584	1279614	14213383	0	155140	0	0	0	1344499	5238569	8067	494085	0	1810685	7047072	31768698	140791915	12_Malvids
352	Noccaea goesingensis	0	3503645	8466451	8020	337536	118968	11478	16866	1038402	4197065	11941	550606	80797	1862826	10666119	30870720	150323284	12_Malvids
353	Raparia bulbosa	0	2474443	15308320	0	290445	126567	0	0	1079308	6067293	10857	563192	65019	2144395	10936407	39066246	152783568	12_Malvids
354	Conringia planisiliqua	0	2646291	30787366	0	453661	0	80203	20774	1051795	7868190	495612	552673	17173	2279278	17540512	63793528	184155600	12_Malvids
355	Cochlearia officinalis	0	2302520	10521538	45957	332606	32883	0	13580	1894493	18169276	107315	675667	360175	2490961	22597762	59544733	164468807	12_Malvids
356	Crucihimalaya himalaica	0	7092492	53780776	0	185031	33151	0	340241	3529215	25228349	6194	548487	133031	2335963	21923822	115136752	234721433	12_Malvids
357	Erysimum cheiri	0	2871681	7137593	0	428892	81965	0	3784	2089862	4697971	11451	619801	114130	2119108	6059799	26236037	147320935	12_Malvids
358	Erysimum pusillum	0	3112025	7991117	0	370464	16594	64725	0	2179631	4778981	22541	770133	66137	2544399	7432305	29349052	184063902	12_Malvids
359	Euclidium syriacum	0	5876765	45978308	0	417610	0	18607	0	3567205	11100985	316759	586830	122008	2028049	24383921	94397047	229211023	12_Malvids
360	Eutrema heterophyllum	101492	8974390	89064032	0	555747	181141	0	0	4468216	35605800	42679	874869	270300	2977051	38650647	181766364	348971089	12_Malvids
361	Eutrema salsugineum	0	5124669	74548816	0	312253	0	134226	0	4068134	12885701	4088	572548	333288	2019950	25251277	125254950	243110105	12_Malvids
362	Eutrema yunnanense	0	11109437	136264702	99165	1103423	103985	57175	0	6741615	38469521	330915	816454	75196	2950009	40101157	238222754	415364017	12_Malvids
363	Iberis amara	71739	22370061	47310032	71889	936284	122148	0	42081	3460996	33512793	0	1055572	74155	4035422	51737296	164800468	361245353	12_Malvids
364	Iberis pinnata	0	43561438	230014164	0	2159617	242809	0	0	4172014	81546528	0	1376263	1093027	5611017	79244577	449021454	686283031	12_Malvids
365	Isatis lusitanica	0	4838067	19823174	0	264023	76029	44978	0	2525865	7708659	0	674655	0	2111550	13555273	51622273	203919019	12_Malvids
366	Isatis tinctoria	0	9735544	24393443	0	587154	133473	0	0	3601901	11829633	0	814598	17948	2693503	24590299	78397496	244177058	12_Malvids
367	Kernera saxatilis	0	2667920	7924646	0	150356	102222	48748	0	915245	5192046	41866	594001	326	2063976	5694645	25395997	143969369	12_Malvids
368	Lepidium africanum	0	11780513	46732334	0	122059	0	0	0	4770283	18138397	0	634180	0	2285485	16695040	101158291	225262187	12_Malvids
369	Lepidium aucheri	0	18946733	96441226	0	153833	0	0	0	10606331	29698027	0	981023	45097	2795561	34418738	194086569	332062533	12_Malvids
370	Sisymbrium altissimum	0	4022387	22684670	0	191684	20630	0	0	1822261	9989036	0	661369	0	2210138	12601620	54203795	178647359	12_Malvids
371	Sisymbrium irio	0	5049283	28668550	0	173421	15720	0	0	2136256	9203040	0	615884	73987	1986461	28649583	76572185	245550082	12_Malvids
372	Macropodium nivale	0	6531497	44321595	0	238598	370283	0	0	2101601	12835107	56795	867133	111189	3524839	20732763	91691400	300734812	12_Malvids
373	Pseudoturritis turrita	0	10906076	91187637	0	800198	345195	278489	0	2569148	35332624	452142	823849	0	2997354	32364269	178056981	321562673	12_Malvids
374	Turritis glabra	0	3770252	19468391	0	132979	39383	0	0	2781336	9020958	0	560704	66106	2103239	4301665	42245013	157630095	12_Malvids
375	Thlaspi arvense	28143	4692983	141732885	0	107677	17383	63180	0	4385713	10551301	68436	628420	786476	2138078	37859099	203059774	343012389	12_Malvids
376	Carica papaya	0	8269867	104929973	148954	20856	0	0	54041	12123	4745368	195490	882894	4981826	4365836	24798219	153405447	370418818	12_Malvids
377	Tarenaya hassleriana	0	1796060	61388608	0	261935	0	0	0	248494	10936255	172246	603413	188783	3971257	24128850	103695901	249929577	12_Malvids
378	Santalum album	37123	3126858	13411665	0	268892	0	0	0	462024	6398261	260993	702976	0	2984451	33155905	60809148	196100524	13_Super_asterids
379	Amaranthus hypochondriacus	0	7821704	10474187	5138	451192	0	9117	0	314595	5968093	0	632976	35313	2263304	34440882	62416501	502147592	13_Super_asterids
380	Carnegiea gigantea	0	35335041	379473776	0	2074699	318253	385916	315307	5000853	71225994	91153	1696077	541516	7618676	136550009	640627270	980350675	13_Super_asterids
381	Lophocereus schottii	2670561	31631125	263385958	0	1615401	0	0	0	7702992	47519487	0	1382599	1096954	5193556	140894544	503093177	797925904	13_Super_asterids
382	Pachycereus pringlei	0	20606164	180749529	0	1368691	0	0	229570	2196657	37852980	20710	932783	1610288	3480030	109859781	358907183	629656250	13_Super_asterids
383	Stenocereus thurberi	271899	42527545	297467645	0	1240030	0	0	739370	6513606	52068635	93823	1497255	782075	5779255	151745458	560726596	853347554	13_Super_asterids
384	Pereskia humboldtii	61857	14736848	35344800	0	85204	0	0	0	839213	5242796	0	884396	486893	3430915	119485692	180598614	414047441	13_Super_asterids
385	Dianthus caryophyllus	27069	10536494	91712414	0	753610	118478	0	437821	2116802	25553196	0	1384659	96949	8198845	141419113	282355450	567661845	13_Super_asterids
386	Silene latifolia	0	41758761	94189292	0	3338436	0	39824	202786	1525153	24559478	0	1776029	2763088	8122743	171613505	349889095	1185087342	13_Super_asterids
387	Beta vulgaris	238706	19209396	86516745	831173	999302	0	258751	63274	1140050	35252874	156238	1152616	180512	8122917	131322054	285444608	566550431	13_Super_asterids
388	Beta patula	105592	19309485	51622144	20117	821849	0	0	172808	1215101	21272353	19637	1110234	98347	4629376	110488252	210885295	633549108	13_Super_asterids
389	Bassia scoparia	82178	23154444	147928576	340517	70817	0	0	602347	3269691	37290154	185379	1719957	1041583	8848688	108544986	333079317	711356724	13_Super_asterids
390	Spinacia oleracea	0	17556674	319937215	0	495965	0	513932	143862	5070757	79542822	301499	1150086	391149	6918238	173161801	605184000	869946296	13_Super_asterids
391	Chenopodium pallidicaule	0	4836560	87665669	154122	160837	0	0	291242	58741	26893815	1023825	833786	243766	3779631	54629174	180571168	337010935	13_Super_asterids
392	Chenopodium quinoa	0	17589430	471895979	161960	320663	0	109066	0	385228	70060078	951988	3028386	2491610	15293155	285358741	867646284	1333551035	13_Super_asterids
393	Chenopodium suecicum	216835	11442891	153443082	149427	35557	0	168557	914054	477622	40927313	117658	1314251	826670	7444873	93223951	310702741	536949264	13_Super_asterids
394	Drosera capensis	290716	2963371	42016402	0	317372	0	0	0	396394	4617980	50278	587988	5205037	2301477	37241819	95988834	263787800	13_Super_asterids
395	Fagopyrum esculentum	0	35357377	499420948	677442	2769682	1485217	139551	0	9412301	36064288	1950430	915318	377250	3957297	132738289	725265390	1087700449	13_Super_asterids
396	Fagopyrum tataricum	0	22475862	159471560	0	479210	0	0	162788	1243441	22694599	3013811	763783	82411	4361262	78696336	293445063	505882852	13_Super_asterids
397	Nyssa sinensis	0	81858736	278584916	0	1203642	0	54337	7662006	506225	146445041	383949	2308087	15061580	13755886	166549356	714373761	1001447681	13_Super_asterids
398	Actinidia chinensis	47869	4287334	70158606	0	2278172	152390	46131	35523	681702	30377329	65956	1528213	263988	6086739	116093162	232103114	553842477	13_Super_asterids
399	Actinidia eriantha	72597	5515355	108449729	0	1855400	0	0	163995	2397509	41221744	106407	2021643	0	7884494	146077002	315765875	690611029	13_Super_asterids
400	Monotropa hypopitys	0	30771074	971187492	0	1399314	0	0	0	6935785	101689560	0	1667889	1323913	6719120	814887634	1936581781	2197487858	13_Super_asterids
401	Vaccinium macrocarpon	0	9747626	39076549	27278	2482844	0	128996	0	1184245	23963244	0	799101	1466952	3713374	96829075	179419284	414621889	13_Super_asterids
402	Embelia ribes	0	8256652	134161864	446031	1764858	0	0	0	972693	50105469	573351	1493243	394989	7090151	156275119	361534420	660509584	13_Super_asterids
403	Primula veris	0	3601631	18676275	31726	290119	0	237561	0	83558	12718051	16829	603247	461670	2665388	54227313	93613368	309692940	13_Super_asterids
404	Argania spinosa	0	21011938	96352790	739025	1379431	0	60450	901919	2035962	22379840	398505	2699474	119691	11800546	174016634	333896205	670096797	13_Super_asterids
405	Camellia sinensis	0	43509679	1213291075	0	1128222	32562	923841	1320264	16361646	117528290	892045	7390006	43664695	45685315	969949696	2461677336	3105370065	13_Super_asterids
406	Andrographis paniculata	0	1094261	50180704	0	953741	0	0	317544	602437	16848750	286595	1094484	123531	6449768	73245367	151197182	269408435	14_Lamiids
407	Handroanthus impetiginosus	0	4263044	75621584	0	108347	0	0	55010	4955898	27281397	132087	1665908	215243	6919110	144365513	265583141	503289430	14_Lamiids
408	Dorcoceras hygrometricum	0	1610411	917688132	0	0	0	0	0	29363226	23194240	74129	378943	1095683	2624873	293179346	1269208983	1521360707	14_Lamiids
409	Pogostemon cablin	0	25255173	501133513	889751	14175	0	7398491	534274	12684859	78418374	1772884	4349746	0	21459274	417642067	1071552581	1916685124	14_Lamiids
410	Scutellaria baicalensis	0	1709278	72705537	1206211	10406	0	0	28084	5488069	51067464	57741	892228	103590	5203892	92619645	231092145	386673738	14_Lamiids
411	Perilla citriodora	0	5151891	170780006	0	2127211	0	0	1418918	1782759	40208733	0	1358767	380790	8493877	177491056	409194008	618797171	14_Lamiids
412	Salvia splendens	49924	18872419	211800496	56267	156082	0	13535	0	2698719	99653628	550064	1336213	941455	8679269	145136025	489944096	809159598	14_Lamiids
413	Genlisea aurea	0	143529	100632	0	1107	0	2837	0	30898	711451	0	157174	3107	1051268	4803904	7005907	43357795	14_Lamiids
414	Utricularia gibba	0	113748	15056363	41182	0	0	27770	0	48082	1728216	2836146	171890	0	760015	11578312	32361724	100688548	14_Lamiids
415	Lindernia brevidens	36926	10864579	82220364	24320	235927	0	0	0	606049	16638584	380121	351945	1457298	2548531	43355683	158720327	266104577	14_Lamiids
416	Olea europaea	0	8203096	322804877	0	805731	0	0	494962	3308121	43234151	483742	1743383	923749	7259786	184233545	573495143	1141145264	14_Lamiids
417	Striga asiatica	63695	13335375	126905565	0	325392	0	0	0	5065198	35271088	89941	1063586	43895	5313409	100753104	288230248	471563096	14_Lamiids
418	Sesamum indicum	103877	9919813	37412483	182665	77417	0	0	0	531286	14561958	351209	613055	0	3170581	64212057	131136401	275059498	14_Lamiids
419	Penstemon barbatus	0	13365364	228847279	2656216	502145	0	0	26952	2508524	43029575	1377784	1144095	149168	6595562	163110218	463312882	696306108	14_Lamiids
420	Cuscuta australis	313080	7204703	68142047	179718	100831	0	397	0	2901784	24406008	483087	440830	212822	3612351	63314144	171311802	262630465	14_Lamiids
421	Cuscuta campestris	0	12304583	73735500	1218412	307127	0	0	125456	5366137	40656776	393710	920476	1099707	5616117	118668181	260412182	476791533	14_Lamiids
422	Ipomoea batatas	0	20203400	74190689	0	5983630	0	45249	0	5990688	47598067	32291	2228791	0	12657788	215512557	384443150	837013208	14_Lamiids
423	Ipomoea nil	1029431	27468835	218604694	0	7014089	0	397423	0	6789675	66235911	17996344	1547934	734591	16357244	165979426	530155597	735230855	14_Lamiids
424	Ipomoea trifida	62016	8764749	54531347	0	3984148	0	0	52303	4576153	31914015	358124	1201792	257831	8712687	128199901	242615066	492375559	14_Lamiids
425	Ipomoea triloba	159657	8982253	82367497	41147	3759581	0	439615	15843	4401944	30957361	474736	1192016	1077835	7815350	106764078	248448913	461827428	14_Lamiids
426	Nicotiana attenuata	0	37445929	1389100478	2573112	5132295	0	0	0	9866685	86614227	1810110	1773791	4904072	10986397	131977586	1682184682	2365682703	14_Lamiids
427	Nicotiana glauca	0	49085625	2222284971	0	4903950	0	0	0	15682286	122372508	0	2595037	3213135	10821787	144066564	2575025863	3222828385	14_Lamiids
428	Nicotiana knightiana	0	35920913	1419636813	0	3273618	181818	217861	0	9132115	89096841	378987	1624886	27180530	63929577	201307106	1851881065	2298938968	14_Lamiids
429	Nicotiana obtusifolia	0	36413271	707123594	364431	3588087	78000	69951	0	7590275	63314205	853390	1236117	5781850	5841149	88748436	921002756	1222768627	14_Lamiids
430	Nicotiana paniculata	0	39774303	1385664188	0	3821791	311974	0	0	8139065	80771296	193763	1492483	46778773	9882910	184304865	1761135411	2190564486	14_Lamiids
431	Nicotiana tabacum	0	53023771	2258086160	624145	9288078	0	0	0	18416946	124880520	351490	3169983	18369527	14518522	253360871	2754090013	3643471356	14_Lamiids
432	Nicotiana undulata	568932	35009725	1226069532	55844	4116165	0	1185694	0	5949791	71104897	0	1304358	3415796	8211444	195492752	1552484930	1914301639	14_Lamiids
433	Capsicum annuum	0	62882524	1876914469	0	7826540	0	1674202	0	3333365	216818362	1811116	3317897	409025	14115611	194134411	2383237522	2935884163	14_Lamiids
434	Capsicum baccatum	0	76772459	1882708362	0	9352000	3549553	0	0	5641310	204089901	21441834	3410132	9826529	16427809	423058380	2656278269	3215610539	14_Lamiids
435	Capsicum chinense	340231	56501007	1599815597	0	8126078	165180	0	1977174	5398394	225768475	1136491	3491194	19088291	14225824	569929206	2505963142	3070910353	14_Lamiids
436	Jaltomata sinuosa	322724	26828537	858693849	0	4630535	108779	0	0	2001712	87425068	384296	1608752	363274	6152365	215138144	1203658035	1443196791	14_Lamiids
437	Solanum arcanum	0	12042098	267431719	0	2003585	3214980	0	46977	1435243	45029585	315678	1264736	1058170	5815504	49074823	388733098	665186956	14_Lamiids
438	Solanum chilense	0	20453343	336627837	0	1720390	1337764	0	0	570756	55648263	97143	1333923	53132	5458329	35072911	458373791	913880739	14_Lamiids
439	Solanum habrochaites	0	12317061	320393480	0	1640895	3725756	0	85962	1559433	48699127	226562	1378691	0	5790883	47844270	443662120	724284658	14_Lamiids
440	Solanum lycopersicum	0	12825385	361672106	0	1681914	3326317	0	0	495169	49768744	244103	1317337	3116	6300020	48517552	486151763	828349174	14_Lamiids
441	Solanum pennellii	0	17311757	444124820	0	3668410	3661587	0	0	2030918	56560384	199951	1357720	722372	14237756	52791908	596667583	926426464	14_Lamiids
442	Solanum melongena	0	26797119	426854584	0	2401554	471239	0	0	1018044	36355816	227979	1177612	461303	4945780	90274867	590985897	833080760	14_Lamiids
443	Asclepias syriaca	0	4947907	77012834	353619	200529	0	0	48969	663995	2313758	622510	437641	99046	1517280	59643920	147862008	236770010	14_Lamiids
444	Calotropis procera	0	2390265	16668304	0	0	0	0	0	50641	1064031	14034	641335	0	2907668	14790750	38527028	209214572	14_Lamiids
445	Rhazya stricta	0	1933166	63639982	38819	88840	0	0	356968	791025	8767264	129527	577687	0	1922475	44817795	123063548	274354041	14_Lamiids
446	Catharanthus roseus	30997	11993584	131968334	0	186816	0	1250593	562087	1022708	44290179	310260	1139899	62435	4977647	152132886	349928425	522653749	14_Lamiids
447	Coffea arabica	166776	17208346	452465120	0	723449	0	282109	518595	4308505	36591596	0	1768376	1254671	6874175	210903256	733064974	1094446607	14_Lamiids
448	Coffea canephora	0	7979385	147077477	0	244953	0	0	243155	2272862	16338164	0	864293	195504	4127933	89936042	269279768	568611505	14_Lamiids
449	Coffea eugenioides	272571	11151576	289552554	1352	385563	0	0	0	4783249	23514574	171131	1053793	846033	4212881	132285950	468231227	699903961	14_Lamiids
450	Echium plantagineum	0	10515592	23292963	0	3586383	0	93234	166185	718841	24016212	972333	554348	519731	2874784	67337909	134648515	348920917	14_Lamiids
451	Mikania micrantha	591943	22244770	988937745	0	1463830	0	1349772	731390	3612105	139125138	62900	2355227	1515665	14556283	293786574	1470333342	1790643622	15_Campanulids
452	Artemisia annua	0	44064689	529994582	1699661	670973	0	0	0	15438303	73783441	0	2560803	321726	19549919	390704544	1078788641	1792856094	15_Campanulids
453	Erigeron canadensis	0	5942578	17804672	0	1462667	0	0	0	2773329	9161141	6676	770715	11765	4701658	86227557	128862758	326165195	15_Campanulids
454	Helianthus annuus	605997	43059109	1579065497	1481547	1807678	0	273564	0	15907390	96814295	905437	2972724	12570764	23014491	776728469	2555206962	3027844889	15_Campanulids
455	Cynara cardunculus var. scolymus	1134903	10863805	205609020	820528	1044673	0	261271	4616812	2949203	46752888	387591	811704	1225393	7598871	198707747	482784409	725197765	15_Campanulids
456	Lactuca sativa	0	24730222	1188056547	0	11859502	0	4026238	256402	2141914	76469152	0	2352818	24404347	15282153	726836258	2076415553	2384188817	15_Campanulids
457	Codonopsis pilosula	181196	34424558	251923341	0	980427	0	747321	229434	9421587	76818422	76274	1511701	14977	10565695	259072182	645967115	937709907	15_Campanulids
458	Platycodon grandiflorus	0	19636947	163979867	588256	584890	0	0	77978	2981241	74849316	66761	1466437	7783	9482021	140262651	413984148	680177651	15_Campanulids
459	Daucus carota	0	3964470	54485855	158005	171988	0	0	55451	1934923	28421076	141765	815519	147802	3687588	77878431	171862873	421539040	15_Campanulids

## Sheet: 2b length_percentage_genome
Supplementary Table 2b The percentage of repeat length in different plant genome
Calculation method: The actual length of each repeat sequence was list in Supplementary Table 2a, length percentage in genome = the length of repeat / genome size
NO	Species name	DIRS	LINE	LTR	PLE	SINE	unknown	Circular_dsDNA	DNA_Polymerase	Rolling_Circle	TIR	RNA	Low_complexity	Satellite	Simple_repeat	Unknown	Total_repeat_percentage	Genome_size_percentage	species_type
1	Chloropicon primus	0	0	0.02	0	0	0	0	0	0	0.69	0	0.68	0	3.49	2.24	7.12	100	01_Alage
2	Edaphochlamys debaryana	0.04	1.21	0.43	0.02	0.02	0	0	0	0.23	0.17	0	1.01	0	4.41	4.83	12.37	100	01_Alage
3	Bathycoccus prasinos	0	0	0.11	0.07	0	0	0	0.49	0	0.48	0	0.82	0	3.78	1.79	7.54	100	01_Alage
4	Ostreococcus tauri	0	0.01	0	0	0	0	0	0	0.14	0.21	0	0.1	0.04	3.62	2.22	6.34	100	01_Alage
5	Micromonas	0.54	0.04	0.81	0.03	0	0	0.64	0	0.41	2.53	0	0.08	0	4.14	5.69	14.91	100	01_Alage
6	Micromonas commoda	0	0	0.07	0	0	0	0	0	0.01	0	0	0.1	0	1.37	8.59	10.14	100	01_Alage
7	Micromonas pusilla	0	0	0.01	0	0	0	0	0.02	0	0.17	0	0.24	0	3.17	1.85	5.46	100	01_Alage
8	Bathycoccus	0	0	0.04	0	0	0	0.01	0	0	0.06	0	0.28	0	8.6	6.58	15.57	100	01_Alage
9	unclassified Mamiellophyceae	0.03	0.34	0.33	0.04	0.07	0	0.13	0.14	0	1.92	0	0.65	0.04	4.45	0.5	8.64	100	01_Alage
10	Cymbomonas tetramitiformis	0	0	0	0	0	0	0	0	0	0	0	0.09	0	0.81	1.16	2.06	100	01_Alage
11	Chlamydomonas	0.96	1.44	2.02	0.06	0.05	0	0.04	0.03	0.03	0.89	0	0.07	0.01	0.79	18.76	25.15	100	01_Alage
12	Chlamydomonas applanata	0	0.09	0.04	0	0.01	0	0	0	0.02	0.12	0	1.23	0	4.81	3.35	9.67	100	01_Alage
13	Chlamydomonas applanata	0.01	1.44	0.63	0	0	0	0.01	0	0	0.08	0	0.37	0	3.31	2.73	8.58	100	01_Alage
14	Chlamydomonas asymmetrica	0	1.59	0.43	0.04	0	0	0	0	0.04	0.61	0	0.13	0.01	2.54	7.32	12.71	100	01_Alage
15	Chlamydomonas debaryana	0.02	1.34	0.61	0	0.02	0	0	0	0.24	0.17	0	1.01	0	4.42	4.57	12.4	100	01_Alage
16	Chlamydomonas eustigma	0	0.51	1.14	0	0	0	0	0.01	0.13	0.01	0	0.06	0	0.65	2.94	5.45	100	01_Alage
17	Chlamydomonas reinhardtii	0.01	4.36	0.4	0.03	0.12	0	0	0.06	0.35	2.57	0.01	0.59	0.28	5.58	5.82	20.18	100	01_Alage
18	Chlamydomonas sphaeroides	0.08	1.59	0.56	0.05	0	0	0	0	0.01	0.06	0	0.72	0	5.18	5.55	13.8	100	01_Alage
19	Chloromonas	0.02	0.84	0.22	0	0	0	0.05	0.19	0	0.45	0.02	0.12	0.08	1.71	9.78	13.48	100	01_Alage
20	Eudorina	0.3	7.8	2.48	0.29	1.09	0	0	0.03	1.61	6.42	2.19	0.47	0.26	5.84	12.7	41.48	100	01_Alage
21	Gonium pectorale	0.12	1.2	0.62	0.03	0.03	0	0	0	0.05	0.33	0	0.5	0	3.14	6.34	12.36	100	01_Alage
22	Volvox carteri	0.96	4.37	3.82	0.03	0.29	0	0.06	0.1	0.75	2.37	0.2	0.38	0.2	4.53	8.53	26.59	100	01_Alage
23	Yamagishiella unicocca	0.27	5.91	3.39	0.04	0.29	0	0	0	0.13	2.77	0.93	0.45	0.15	3.95	18.61	36.89	100	01_Alage
24	Haematococcus	0	1.49	0.32	0.17	0.01	0	0.2	0	0	0.17	0	0.33	0.01	2.9	2.21	7.81	100	01_Alage
25	Haematococcus lacustris	0.05	5.92	4.31	0.03	0.02	0	0.2	0.04	0.39	1.79	0	0.62	0.04	5.52	22.61	41.54	100	01_Alage
26	Characiochloris	0.02	0.73	0.17	0.02	0	0	0	0.07	0	0.38	0.06	0.11	0.01	1.63	9.71	12.91	100	01_Alage
27	Dunaliella	0	0.63	0.17	0	0	0	0	0	0	2.19	0	0.12	0	2.65	1.86	7.62	100	01_Alage
28	Dunaliella salina	0.03	14.95	1.68	0.07	0	0	0	0	0.05	1.23	0.02	0.08	0.04	2.65	20.1	40.9	100	01_Alage
29	Tetrabaena socialis	0	1.25	0.27	0.01	0	0	0	0	0.11	0.89	0	0.42	0.03	3.41	8.19	14.58	100	01_Alage
30	Mychonastes homosphaera	0	0	0.89	0	0	0	0	0	0	0.11	0	1.09	0	15.11	0.36	17.56	100	01_Alage
31	Messastrum gracile	0	0.15	0.12	0	0	0	0	0	0	0.35	0	1.02	0.02	7.3	1.12	10.08	100	01_Alage
32	Monoraphidium	0	10.02	2.52	0.01	0.04	0	0.05	0.04	0	0.25	0	0.04	0	1.71	4.23	18.91	100	01_Alage
33	Monoraphidium neglectum	0	1.01	0.01	0	0	0	0	0	0	2.05	0	0.28	0	5.68	0.95	9.98	100	01_Alage
34	Raphidocelis subcapitata	0	0.24	0.07	0	0	0	0	0	0	0.06	0	0.99	0	10.34	2	13.7	100	01_Alage
35	Desmodesmus armatus	0.13	7.68	1.32	0.06	0.29	0	0.08	0.1	0	1.31	0.17	0.32	0.04	3.86	7.66	23.02	100	01_Alage
36	Scenedesmus	0.02	11.58	2.23	0	0	0	0.02	0	0.01	0.37	0	0.05	0.01	6.82	1.62	22.73	100	01_Alage
37	Scenedesmus quadricauda	0	0.27	0.01	0	0.01	0	0	0	0	0.62	0.01	0.15	0	4.27	0.84	6.18	100	01_Alage
38	Scenedesmus vacuolatus	0	6.51	1.34	0	0	0	0	0	0	0	0	0.04	0	2.22	0.75	10.86	100	01_Alage
39	Coelastrella	0	4.77	0.56	0	0.01	0	0	0	0	0.18	0	0.03	0	1.65	3.63	10.83	100	01_Alage
40	Tetradesmus obliquus	0.05	13.85	0.74	0	0	0	0.01	0	0.09	0.55	0	0.06	0	8.69	2.3	26.34	100	01_Alage
41	Tetraselmis striata	5.41	7.4	5.77	0.01	0.03	0	0.03	0.07	0.54	3.59	0.01	0.2	0.06	2.04	29.6	54.76	100	01_Alage
42	Picocystis	0.05	0.66	12.22	0	0.04	0	0.24	0.02	0	4.18	0.47	0.13	0	0.47	6.03	24.51	100	01_Alage
43	Ulva mutabilis	0.07	7.56	16.14	0.15	0	0	0	0	0.09	0.24	0	0.04	0	1.31	14.24	39.84	100	01_Alage
44	Ulva prolifera	0.07	1.66	5.14	0.03	0.14	0	0	0	0.16	1.12	0.23	0.05	0.06	1.17	13.78	23.61	100	01_Alage
45	Parachlorella kessleri	0	0.5	0.08	0	0	0	0.01	0	0.05	0.02	0	0.15	0	1.81	2.59	5.21	100	01_Alage
46	Helicosporidium	0	0	0	0	0	0	0	0	0	0	0	0.18	0.01	0.94	1.88	3.01	100	01_Alage
47	Auxenochlorella pyrenoidosa	0	0.1	0.03	0	0	0	0	0	0	0.04	0	0.49	0	4.18	0.64	5.48	100	01_Alage
48	Auxenochlorella protothecoides	0	0.06	0	0	0	0	0	0	0	0.22	0.01	0.29	0	1.6	1.62	3.8	100	01_Alage
49	Micractinium conductrix	0.06	3.99	1.51	0	0.08	0	0	0	0.23	1.98	0	0.72	0	7.66	4.55	20.78	100	01_Alage
50	Chlorella sorokiniana	0	1.01	1.96	0	0.05	0	0	0	0	0.33	0	0.2	0	4.22	2.15	9.92	100	01_Alage
51	Chlorella variabilis	0	1.05	0.46	0	0	0	0	0	0.04	0.42	0	0.54	0	6.66	2.57	11.74	100	01_Alage
52	Chlorella vulgaris	0	0.63	0.08	0	0	0	0	0	0	0.11	0	0.34	0	5.04	1.17	7.37	100	01_Alage
53	Prototheca bovis	0	0	0	0	0	0	0	0	0	0.58	0	1.82	0.27	7.45	2.71	12.83	100	01_Alage
54	Prototheca ciferrii	0	0	0	0	0.27	0	0	0	0	0.24	0	1.18	0	5.76	2.39	9.84	100	01_Alage
55	Prototheca cutis	0	0.46	0.01	0	0	0	0	0	0	0.1	0	0.11	0	1.72	3.34	5.74	100	01_Alage
56	Prototheca stagnorum	0	0	0	0	0	0	0.02	0	0	0	0	0.9	0	4.36	2.75	8.03	100	01_Alage
57	Prototheca wickerhamii	0	0.01	0.98	0	0.01	0	0	0	0	0	0	0.15	0	1.7	1.56	4.41	100	01_Alage
58	Prototheca zopfii	0	0	0.19	0	0.02	0	0.02	0	0	0.33	0	1.83	0.03	7.44	3.41	13.27	100	01_Alage
59	Chloroidium	0	0.04	0	0	0	0	0	0	0	0	0	0.15	0	0.98	0.64	1.81	100	01_Alage
60	Chlorella	0	0.25	0.01	0	0	0	0	0	0	0.16	0	1.29	0	8.98	1.34	12.03	100	01_Alage
61	Picochlorum	0	0.11	0	0	0	0	0	0	0	0.03	0	0.11	0	0.6	0.75	1.6	100	01_Alage
62	Botryococcus braunii	0.22	2.76	15.47	0.08	0	0	0.03	0	0.13	8.23	0.06	0.54	0.42	7.42	6.61	41.97	100	01_Alage
63	Coccomyxa	0	0.26	0.09	0	0	0	0	0	0	0.01	0	0.03	0	0.42	1.05	1.86	100	01_Alage
64	Coccomyxa subellipsoidea C-169	0	1.6	0.06	0	0	0	0	0	0	0.77	0.08	0.04	0	0.72	2.58	5.85	100	01_Alage
65	unclassified Trebouxiophyceae	0.2	0.66	0.28	0	0	0	0	0	0	0.17	0	0.26	0	3.05	2.84	7.46	100	01_Alage
66	Trebouxia	0	1.14	0.74	0	0	0	0	0	0.06	0.03	0	0.06	0	1.02	3.6	6.65	100	01_Alage
67	Trebouxia gelatinosa	0.04	0.48	0.37	0	0	0	0	0	0.06	0.25	0	0.02	0	0.72	1.64	3.58	100	01_Alage
68	Chlorokybus atmophyticus	0.49	1.85	13.99	0	0.04	0	0.1	0	0	7.04	0	0.13	0.07	2.41	7.6	33.72	100	01_Alage
69	Mesostigma viride	0.2	4.07	0.39	0.09	0	0	0	0.01	0.01	0.49	0	0.2	0	2.49	19.92	27.87	100	01_Alage
70	Klebsormidium nitens	0.07	0.14	0.63	0	0	0	0	0	0	0.31	0.03	0.06	0	0.37	2.97	4.58	100	01_Alage
71	Chara braunii	0.21	5.21	15.8	0.21	0.22	0	0.19	0.05	0.4	5.32	1.05	0.37	0.46	2.46	29.03	60.98	100	01_Alage
72	Mesotaenium endlicherianum	0.44	0.45	19.67	0.01	0	0	0	0.03	0.01	3.52	0	0.61	0.02	3.12	12.11	39.99	100	01_Alage
73	Physcomitrella patens	0	1.99	52.69	0	0	0	0	0	0.52	0.67	0.06	0.28	0.01	1.53	4.21	61.96	100	02_Bryophyte
74	Pleurozium schreberi	0.04	0.55	1.81	0.03	0.02	0	0	0.04	0.12	4.16	0.04	0.1	0.08	0.51	41.06	48.56	100	02_Bryophyte
75	Marchantia inflexa	0	0.5	10.34	0.03	0.02	0	0	0.03	0.58	2.26	0	0.1	0.01	0.41	17.3	31.58	100	02_Bryophyte
76	Marchantia polymorpha	0.02	1.58	8.98	0.02	0.03	0	0.05	0	0.36	2.05	0.02	0.19	0	0.92	11.97	26.19	100	02_Bryophyte
77	Selaginella kraussiana	0.01	3.6	4.59	0.09	0.17	0	0	0.02	0.33	1.98	0.08	0.16	0	0.78	14.74	26.55	100	03_Lycophytes
78	Selaginella moellendorffii	0	0.94	29.96	0.11	0.31	0	0.03	0.05	1.27	7.2	0.43	0.12	0.06	0.79	11.35	52.62	100	03_Lycophytes
79	Selaginella tamariscina	0.03	2.24	25.96	0.35	0.55	0	0.03	0.1	0.17	14.47	0.15	0.22	0.01	2.26	19.77	66.31	100	03_Lycophytes
80	Adiantum capillus-veneris	0	4.67	39.63	0.46	0.02	0	0	0.02	0.28	5.35	0	0.07	0.03	1.07	23.36	74.96	100	04_Fern
81	Azolla filliculoides	0	6.72	44.64	0.11	1.06	0	0	0.03	0.29	4.18	0.61	0.11	0.17	1.33	15.26	74.51	100	04_Fern
82	Salvinia cucullata	0	3.27	17.86	0	1.17	0	0	0.01	0.23	2.16	1.55	0.09	0.33	0.71	17.38	44.76	100	04_Fern
83	Gnetum montanum	0	3.27	57.41	0.05	0.12	0	0	0.12	0.16	1.11	0.07	0.07	0.42	0.23	28.08	91.11	100	05_Gymnosperms
84	Sequoiadendron giganteum	0	3.89	44.73	0.19	0.01	0.03	0.21	0.01	0.17	6.92	0.04	0.13	0.26	0.55	20.78	77.92	100	05_Gymnosperms
85	Amborella trichopoda	0	4.63	31.65	0	0.06	0	0	0.02	0.1	17.06	0.04	0.28	0	1.42	3.26	58.52	100	06_ANA
86	Nymphaea colorata	0.1	1.67	15.76	0.29	0.01	0	0.03	0.01	0.72	8.65	0.72	0.24	0.01	1.29	9.61	39.11	100	06_ANA
87	Cinnamomum micranthum	0.01	3.17	18.04	0	0.22	0	0.02	0.01	0.47	5.71	0.03	0.28	0.12	1.32	23.73	53.13	100	07_Magnoliids
88	Persea americana	0	3.12	21.03	0.04	0.07	0	0.05	0.04	0.27	5.66	0	0.25	0.26	1.02	24.14	55.95	100	07_Magnoliids
89	Liriodendron chinense	0.01	2.2	44.04	0	0.01	0	0	0.13	0.1	9.26	0.06	0.12	0	0.85	27.55	84.33	100	07_Magnoliids
90	Magnolia ashei	0.02	4.45	13.58	0	0.02	0.1	0	0.02	0.12	10.47	0.01	0.15	0.07	0.72	32.45	62.18	100	07_Magnoliids
91	Spirodela polyrhiza	0.01	0.39	8.98	0.04	0	0	0	0	0.1	1.33	0	0.35	0.15	1.9	7.35	20.6	100	08_Monocots
92	Zostera marina	0	4.62	23.75	0.03	0.02	0	0	0	0.11	6.63	0.02	0.17	0.09	0.7	23.54	59.68	100	08_Monocots
93	Dioscorea alata	0.02	2.04	29.9	0.01	0.01	0	0.01	0	0.33	5.7	0.11	0.35	0.08	3.6	17.08	59.24	100	08_Monocots
94	Dioscorea rotundata	0.03	2.44	25.57	0.05	0.03	0	0.03	0	0.25	7.14	0.01	0.32	0.02	1.63	13.05	50.57	100	08_Monocots
95	Trichopus zeylanicus	0.09	0.45	18.64	0	0.33	0	0	0.31	0.47	16.78	0.18	0.17	0.05	4.27	16.35	58.09	100	08_Monocots
96	Xerophyta viscosa	0	1.51	9.22	0	0.17	0	0.02	0.13	0.33	9.25	0.03	0.27	0.23	1.93	20.2	43.29	100	08_Monocots
97	Asparagus officinalis	0	1.68	50.96	0.01	0	0	0.08	0.02	0.71	4.76	0	0.11	0	0.83	23.53	82.69	100	08_Monocots
98	Apostasia shenzhenica	0.02	4.24	11.25	0	0.03	0	0	0.04	0.09	6.63	0.09	0.34	0.16	1.37	26.65	50.91	100	08_Monocots
99	Gastrodia elata	0	4.51	40.72	0	0.01	0	0	0	0.55	8.02	0.03	0.12	0.01	0.72	30.15	84.84	100	08_Monocots
100	Dendrobium catenatum	0	5.81	24.08	0.02	0.16	0	0	0.01	0.12	4.4	0	0.21	0.17	0.86	31.18	67.02	100	08_Monocots
101	Phalaenopsis aphrodite	0.06	3.88	34.2	0	0	0	0	0	0.08	4.09	0	0.17	1.41	0.79	22.41	67.09	100	08_Monocots
102	Phalaenopsis equestris	0.04	3.94	34.8	0	0	0	0	0	0.04	4.7	0	0.2	0.32	0.82	24.16	69.02	100	08_Monocots
103	Vanilla planifolia	0	3.18	12.91	0.02	0.01	0	0	0	0.01	0.99	0.1	0.53	0	1.22	17.72	36.69	100	08_Monocots
104	Cocos nucifera	0	0.59	46.77	0	0.02	0	0.02	0.04	0.06	5.84	0	0.13	0.4	0.65	17.96	72.48	100	08_Monocots
105	Elaeis guineensis	0.05	0.8	27.34	0	0.02	0	0.03	0	0.09	4.4	0	0.13	0.28	0.53	13.83	47.5	100	08_Monocots
106	Elaeis oleifera	0	1.01	32.05	0	0.05	0	0.02	0.03	0.13	4.25	0	0.13	0.48	0.51	10.93	49.59	100	08_Monocots
107	Calamus simplicifolius	0.03	4.46	42.13	0.13	0.03	0	0.02	0	0.4	8.32	0.07	0.15	0.38	0.7	15.75	72.57	100	08_Monocots
108	Ananas comosus	0.35	0.99	19.38	0.01	0	0	0	0.06	0.23	11.26	0.04	0.42	0.07	1.92	30.24	64.97	100	08_Monocots
109	Raddia distichophylla	0	2.49	20.1	0.01	0.11	0.4	0	0.02	0.89	10.15	0.02	0.15	0.08	0.92	15.8	51.14	100	08_Monocots
110	Leersia perrieri	0	1.97	11.6	0	0.25	0.45	0	0	1.24	11.6	0	0.15	0.03	1.01	2.6	30.9	100	08_Monocots
111	Oryza barthii	0	1.53	12.5	0	0.33	0.38	0	0	4.63	16.81	0	0.16	0.06	1.1	1.93	39.43	100	08_Monocots
112	Oryza brachyantha	0	0.44	8.13	0	0.14	0.09	0	0	3.7	16.84	0	0.15	0.01	1.07	2.04	32.61	100	08_Monocots
113	Oryza glaberrima	0	1.43	14.83	0	0.23	0.39	0	0	4.17	16.34	0.1	0.17	0.03	1.22	2.38	41.29	100	08_Monocots
114	Oryza glumipatula	0	1.15	9.69	0	0.16	0.31	0.01	0	3.66	12.97	0	0.14	0.03	1.06	1.16	30.34	100	08_Monocots
115	Oryza longistaminata	0	1.37	13.31	0	0.37	0.26	0	0	3.83	14.16	0.02	0.16	0.03	1.19	1.23	35.93	100	08_Monocots
116	Oryza meridionalis	0	1.18	7.64	0	0.22	0.34	0.01	0	2.98	12.22	0	0.14	0.02	1.01	1.39	27.15	100	08_Monocots
117	Oryza meyeriana var. granulata	0	0.51	54.87	0	0.04	0.03	0	0	1.27	9.95	0.07	0.09	0.02	0.52	5.03	72.4	100	08_Monocots
118	Oryza punctata	0	0.96	27.1	0	0.2	0.35	0	0	2.48	14.83	0	0.13	0.01	0.87	1.8	48.73	100	08_Monocots
119	Oryza rufipogon	0	1.34	14.54	0	0.18	0.36	0	0	3.97	16.55	0	0.17	0.28	1.29	1.46	40.14	100	08_Monocots
120	Oryza sativa	0	1.17	18.45	0	0.18	0.39	0	0	3.56	16.67	0.03	0.15	0.31	1.38	3.57	45.86	100	08_Monocots
121	Oryza sativa f. spontanea	0.03	1.43	11.17	0	0.23	0.28	0	0	4.16	15.36	0	0.16	0.03	1.22	1.07	35.14	100	08_Monocots
122	Zizania latifolia	0	0.84	21.12	0	0.03	0.04	0	0	0.33	8.6	0	0.11	0.02	0.7	6.52	38.31	100	08_Monocots
123	Brachypodium distachyon	0.05	2.64	18.15	0.03	0.12	0.29	0.01	0	0.54	8.07	0.13	0.12	0.06	0.73	7.61	38.55	100	08_Monocots
124	Dactylis glomerata	0	3.34	30.37	0	0.05	0.61	0	0	0.21	7.1	0	0.07	0.03	0.41	15.6	57.79	100	08_Monocots
125	Lolium perenne	0	6.13	7.64	0	0.12	0.98	0	0	0.2	3.94	0	0.13	0.03	0.61	11.44	31.22	100	08_Monocots
126	Hordeum pubiflorum	0	2.93	43.32	0	0.13	0.5	0	0.01	0.45	7.81	0	0.08	0.01	0.57	15.24	71.05	100	08_Monocots
127	Hordeum vulgare	0	1.14	73.73	0	0.02	0.09	0	0	0.1	6.45	0.02	0.07	0.59	0.31	4.23	86.75	100	08_Monocots
128	Aegilops tauschii	0	1.71	58.13	0	0.01	0.08	0	0.06	1.29	16.57	0.19	0.06	0.12	0.32	7.08	85.62	100	08_Monocots
129	Triticum aestivum	0.02	1.47	61.59	0	0	0.08	0	0.03	0.72	12.88	0.01	0.05	0.19	0.25	8.2	85.49	100	08_Monocots
130	Triticum dicoccoides	0	1.44	62.55	0	0.08	0.14	0	0	0.6	12.05	0	0.05	0.23	0.26	8.26	85.66	100	08_Monocots
131	Triticum urartu	0	1.29	64.38	0.03	0.01	0.11	0	0.05	0.48	10	0	0.05	0.08	0.26	10.16	86.9	100	08_Monocots
132	Eleusine coracana	0	1.46	36.4	0	0.09	0.04	0	0	0.23	5.24	0.02	0.08	0.02	0.61	6.74	50.93	100	08_Monocots
133	Eleusine indica	0.02	1.85	29.06	0	0.13	0.06	0	0	0.27	5.8	0	0.08	0.04	0.5	8.12	45.93	100	08_Monocots
134	Oropetium thomaeum	0	1.54	22.41	0	0.16	0	0	0	1.13	6.16	0.09	0.1	0	0.89	10.72	43.2	100	08_Monocots
135	Eragrostis curvula	0	2.19	20.39	0.09	0.31	0.11	0	0	0.63	8.38	0	0.09	0	0.77	6.1	39.06	100	08_Monocots
136	Eragrostis tef	0	1.5	3.97	0	0.32	0.14	0	0	0.26	4.06	0	0.09	0	0.72	3.84	14.9	100	08_Monocots
137	Sporobolus alterniflorus	0	3.82	29.42	0	0.2	0.15	0	0	0.59	6.1	0	0.06	0.15	0.39	8.97	49.85	100	08_Monocots
138	Zoysia japonica	0	1.21	19.25	0	0.19	0.01	0	0	0.59	8.55	0	0.09	0.6	0.77	8.46	39.72	100	08_Monocots
139	Zoysia matrella	0	1.33	23.96	0	0.19	0.07	0	0.01	1.12	9.13	0	0.09	0.67	0.67	5.49	42.73	100	08_Monocots
140	Zoysia pacifica	0	1.48	22.32	0	0.19	0.02	0.01	0	0.47	8.71	0	0.09	0.78	0.68	8.38	43.13	100	08_Monocots
141	Coix aquatica	0	0.46	69	0	0.03	0.01	0	0	0.24	6.58	0.04	0.06	0	0.4	5.52	82.34	100	08_Monocots
142	Miscanthus sacchariflorus	0	0.91	24.73	0	0.1	0.08	0	0	0.47	5.63	0	0.05	0.14	0.3	6.12	38.53	100	08_Monocots
143	Saccharum hybrid cultivar	0.3	2.12	34.42	0	0.2	0.08	0	0	0.56	10.38	0.04	0.1	0.17	0.71	6.02	55.1	100	08_Monocots
144	Saccharum spontaneum	0	2	39.93	0	0.17	0.15	0	0.03	0.73	9.3	0	0.09	1.26	0.64	5.72	60.02	100	08_Monocots
145	Sorghum bicolor	0.01	1.03	47.07	0	0.06	0.01	0	0	0.52	9.14	0.08	0.07	2.42	0.68	5.32	66.41	100	08_Monocots
146	Zea mays	0	0.69	68.82	0	0.06	0.01	0	0	0.56	4.6	0	0.04	0.05	0.3	6.66	81.79	100	08_Monocots
147	Alloteropsis semialata	0	1.79	36.97	0	0.16	0.07	0	0.01	0.85	9.97	0.03	0.08	0.18	0.55	6.48	57.14	100	08_Monocots
148	Echinochloa crus-galli	0	1.8	19.95	0	0.19	0.3	0	0.01	0.48	7.65	0.03	0.1	0.52	0.85	5.01	36.89	100	08_Monocots
149	Cenchrus americanus	0	1.37	55	0	0.12	0.06	0	0	0.2	4.87	0	0.04	0	0.3	6.94	68.9	100	08_Monocots
150	Setaria italica	0	1.52	26.01	0	0.13	0.27	0	0	0.74	10.31	0	0.11	0.1	0.79	7.92	47.9	100	08_Monocots
151	Setaria viridis	0	1.45	27.91	0.03	0.05	0.24	0	0	0.72	10.18	0	0.12	0.35	0.78	5.74	47.57	100	08_Monocots
152	Dichanthelium oligosanthes	0	0.59	28.97	0	0.06	0.01	0.01	0	0.29	6.77	0	0.07	0	0.64	10.64	48.05	100	08_Monocots
153	Urochloa ruziziensis	0	1.57	28.92	0	0.19	0.28	0	0	0.42	8.26	0	0.09	0.03	0.5	5.01	45.27	100	08_Monocots
154	Panicum miliaceum	0	1.08	36.8	0	0.12	0.11	0	0	0.35	5.11	0.01	0.1	2.21	0.71	8.62	55.22	100	08_Monocots
155	Panicum hallii	0	0.53	51.05	0	0.08	0.12	0	0	0.14	5.31	0.04	0.08	0.9	0.6	7.78	66.63	100	08_Monocots
156	Eichhornia paniculata	0.02	2.32	18.92	0	0.01	0	0	0.01	0.13	3.64	0.02	0.21	0.02	1.34	25.04	51.68	100	08_Monocots
157	Musa acuminata	0	0.96	27.52	0	0.06	0	0	0.04	0.02	1.98	0	0.15	0.02	0.87	10.76	42.38	100	08_Monocots
158	Musa balbisiana	0	1.05	39.09	0.18	0.21	0	0.02	0	0.24	3.49	1.28	0.17	0.02	2.55	9.5	57.8	100	08_Monocots
159	Musa itinerans	0	0.93	25.54	0	0.08	0	0	0	0.07	2.04	0.03	0.18	0.02	0.98	9.33	39.2	100	08_Monocots
160	Musa schizocarpa	0.06	1.78	46.84	0	0.08	0	0	0	0.01	3.13	1.03	0.14	0.3	1.11	8.69	63.17	100	08_Monocots
161	Berberis thunbergii	0.01	4.13	26.04	0	0.31	0	0.05	0	0.55	8.3	0.07	0.18	0	0.74	20.09	60.47	100	09_Base_eudicots
162	Eschscholzia californica	0.1	3.53	16.58	0.05	0.42	0	0.01	0.13	0.46	4.26	0.02	0.22	0.12	0.86	21.12	47.88	100	09_Base_eudicots
163	Macleaya cordata	0	1.97	16.92	0	0.07	0	0.08	0.06	0.43	6.13	0	0.3	0.16	1.14	22.25	49.51	100	09_Base_eudicots
164	Papaver somniferum	0	4.7	41.5	0	0.04	0	0.03	0.05	0.19	5.46	0	0.09	0.09	1.23	23.61	76.99	100	09_Base_eudicots
165	Aquilegia coerulea	0	3.16	18.36	0	0.24	0	0.01	0.01	0.7	4.8	0.08	0.19	0.07	0.95	19	47.57	100	09_Base_eudicots
166	Nelumbo nucifera	0	6.4	22.5	0	0.15	0	0.03	0.01	0.1	7.79	0	0.19	0.02	0.82	15.62	53.63	100	09_Base_eudicots
167	Macadamia integrifolia	0	5.78	28.51	0.02	0.36	0	0.01	0.13	0.18	4.09	0.26	0.43	0.08	1.22	17.76	58.83	100	09_Base_eudicots
168	Kalanchoe fedtschenkoi	0	1.85	8.77	0	0.01	0	0	0	0.34	8.16	0.05	0.17	0.18	0.64	22.1	42.27	100	10_Super_rosids
169	Sedum album	0.01	1.58	16.99	0.07	0.09	0	0.03	0.01	0.32	4.74	0.16	0.11	0.09	0.51	18.61	43.32	100	10_Super_rosids
170	Cissus quadrangularis	0	1.85	9.41	0	0.01	0	0	0	0.14	1.09	0	0.28	0.03	0.86	9.56	23.23	100	10_Super_rosids
171	Vitis aestivalis	0	3.32	8.23	0	0	0	0	0	0.22	0.87	0.02	0.44	0	1.4	31.52	46.02	100	10_Super_rosids
172	Vitis cinerea x Vitis riparia	0	4.49	18.51	0	0.07	0	0	0	0.36	7.24	0.01	0.43	0.02	1.37	7.08	39.58	100	10_Super_rosids
173	Vitis riparia	0.01	4.73	28.28	0.01	0.01	0	0	0.02	0.4	8.86	0	0.37	0	1.35	7.29	51.33	100	10_Super_rosids
174	Vitis vinifera	0.01	4.44	25.26	0	0.02	0	0	0	0.34	8.43	0.01	0.36	0.52	1.49	8.57	49.45	100	10_Super_rosids
175	Vitis x labruscana x Vitis vinifera	0.01	4.83	29.05	0	0.01	0	0	0	0.46	7.63	0.04	0.34	0.22	1.22	6.3	50.11	100	10_Super_rosids
176	Aristotelia chilensis	0	0.68	0.77	0	0	0.01	0	0	0.04	0.56	0	0.3	0	1.09	3.58	7.03	100	11_Fabids
177	Cephalotus follicularis	0	2.1	57.5	0.27	0.02	0	0.17	1.13	0.01	4.92	0	0.08	0.05	0.41	31.54	98.2	100	11_Fabids
178	Populus simonii	0	1.14	19.54	0	0.61	0	0	0	7.58	6.86	0.19	0.3	0.18	1.2	9.42	47.02	100	11_Fabids
179	Salix brachista	0	0.56	18.9	0	2.33	0	0.02	0	6	5.58	0.04	0.28	0	1.47	9.27	44.45	100	11_Fabids
180	Caryocar brasiliense	0	1.19	16.14	0.02	0	0	0.06	0	0.02	1.63	0.01	0.39	0.01	1.2	11.45	32.12	100	11_Fabids
181	Ricinus communis	0.07	0.21	27.01	0.02	0.08	0	0	0	0.15	3.51	0.39	0.32	9.56	1.21	11.83	54.36	100	11_Fabids
182	Jatropha curcas	0	1.95	18.99	0	0.02	0	0	0	0.41	5.09	0.02	0.34	0	1.36	11.72	39.9	100	11_Fabids
183	Manihot esculenta	0.33	0.95	34.33	0.01	0.01	0	0	0	0.05	3.63	0	0.3	0	0.96	15.35	55.92	100	11_Fabids
184	Hevea brasiliensis	0.02	0.72	65.76	0	0.01	0	0	0	0.01	1.28	0	0.18	0	0.85	11.61	80.44	100	11_Fabids
185	Linum usitatissimum	0	2.95	12.49	0.01	0.01	0	0.02	0	0.21	4.44	0.02	0.16	0.06	0.66	9.3	30.33	100	11_Fabids
186	Passiflora edulis	0	3.14	7.83	0	0.04	0	0	0	0.08	1.11	0.01	0.2	0	0.7	16.83	29.94	100	11_Fabids
187	Rhizophora apiculata	0.15	0.92	17.16	0	0.25	0	0	0	0.36	1.3	0.14	0.51	0.56	3.5	10.35	35.2	100	11_Fabids
188	Populus alba	0	1.15	20.61	0.02	0.57	0	0.01	0	6.08	5.77	0.07	0.32	0.03	1.38	7.91	43.92	100	11_Fabids
189	Populus euphratica	0.03	0.55	27.4	0	0.43	0	0	0.04	4.65	4.96	0.17	0.3	0.02	1.24	6.27	46.06	100	11_Fabids
190	Populus trichocarpa	0	0.96	18.4	0	0.59	0	0.02	0	8.13	6.85	0.03	0.28	0.67	1.11	8.08	45.12	100	11_Fabids
191	Glycine tomentella	0	1.48	29.37	0	0.21	0	0.45	0	0.14	6.48	0	0.34	0	1.32	11.06	50.85	100	11_Fabids
192	Carpinus fangiana	0	4.06	15.03	0.01	0.11	0	0	0.02	0.31	4.86	0.01	0.34	0.04	1.4	17.63	43.82	100	11_Fabids
193	Chamaecrista fasciculata	0	2.65	20.56	0.02	0.25	0	0	0	0.55	6.7	0.02	0.28	0.01	1.38	20.95	53.37	100	11_Fabids
194	Vachellia collinsii	0	2.33	12.12	0	0.08	0	0.02	0.03	0.69	10.39	0	0.24	0.14	1.07	18.57	45.68	100	11_Fabids
195	Mimosa pudica	0	1.74	9.76	0	0.47	0	0	0	0.44	3.68	0	0.22	0.06	0.93	25.54	42.84	100	11_Fabids
196	Prosopis alba	0.01	1.11	20.74	0	0.04	0	0	0	0.53	5.76	0.07	0.23	0.01	0.95	22.68	52.13	100	11_Fabids
197	Cercis canadensis	0.01	1.28	16.33	0.03	0.03	0	0	0	0.74	3.78	0.04	0.27	0.11	1	14.38	38	100	11_Fabids
198	Nissolia schottii	0	2.3	16.48	0	0.08	0	0.18	0.06	0.27	6.45	0.04	0.28	0.61	1.29	28.87	56.91	100	11_Fabids
199	Arachis duranensis	0	1.25	47.01	0	0.18	0	0	0.01	0.24	4.01	0	0.38	0.05	0.89	9.07	63.09	100	11_Fabids
200	Arachis hypogaea	0	1.27	58.36	0.03	0.17	0	0.01	0.01	0.31	4.02	0.01	0.35	0	1.11	9.13	74.78	100	11_Fabids
201	Arachis ipaensis	0	1.28	54.14	0	0.14	0	0	0	0.18	3.84	0	0.32	0	0.79	9.95	70.64	100	11_Fabids
202	Arachis monticola	0	1.41	52.13	0.01	0.12	0	0	0.16	0.22	3.8	0.01	0.32	0	1.09	7.51	66.78	100	11_Fabids
203	Lupinus angustifolius	0	2.4	27.62	0	0.26	0	0	0	0.3	5.92	0.06	0.18	0.05	2.19	20.77	59.75	100	11_Fabids
204	Cicer arietinum	0	1.03	25.2	0	0.01	0	0.03	0.02	0.12	7.5	0.04	0.29	2.54	1.29	16.67	54.74	100	11_Fabids
205	Cicer echinospermum	0	1.59	35.21	0	0.02	0	0.03	0.06	0.39	10.2	0.02	0.29	2.89	1.35	12.5	64.55	100	11_Fabids
206	Cicer reticulatum	0	3.3	20.86	0	0.03	0	0	0	0.12	7.84	0	0.33	1.09	1.36	16.46	51.39	100	11_Fabids
207	Vicia faba	0.07	1.38	4.78	0.01	0.07	0	0.04	0.04	0.47	3.15	0.01	0.23	0.01	0.85	12	23.11	100	11_Fabids
208	Medicago truncatula	0.09	4.28	14.2	0	0.46	0	0	0.03	1.31	9.74	0.05	0.27	0.06	1.08	9.89	41.46	100	11_Fabids
209	Trifolium subterraneum	0.01	2.9	17.2	0.02	0.33	0	0	0.01	1.32	6.62	0	0.24	0.03	1.08	15.93	45.69	100	11_Fabids
210	Lotus japonicus	0	3.38	14.58	0	0.21	0	0	0	0.69	5.7	0	0.27	0.12	1.02	14.79	40.76	100	11_Fabids
211	Abrus precatorius	0	2.02	17.07	0	0.08	0	0	0.03	0.31	4.58	1.19	0.46	0.05	1.53	15.92	43.24	100	11_Fabids
212	Cajanus cajan	0.13	0.94	20.45	0.39	0.03	0	0.1	0	0.4	5.3	0	0.33	0.28	1.35	27.52	57.22	100	11_Fabids
213	Glycine max	0	1.38	33.75	0	0.16	0	0.01	0	0.23	5.69	0.05	0.3	1.29	1.21	7.55	51.62	100	11_Fabids
214	Glycine soja	0.02	1.11	35.08	0	0.09	0	0.14	0	0.25	5.72	0.01	0.3	0.77	1.21	8.69	53.39	100	11_Fabids
215	Mucuna pruriens	0	0.72	16.37	0.04	0.08	0	0.05	0	0.06	3	0	0.47	0.05	1.58	24.19	46.61	100	11_Fabids
216	Phaseolus vulgaris	0.08	2.66	27.29	0	0	0	0	0	0.43	3.3	0	0.32	0.03	1.25	17.83	53.19	100	11_Fabids
217	Spatholobus suberectus	0	1.62	19.77	0.08	0.15	0	0.01	0	0.56	11.62	0.05	0.33	0	1.33	23.21	58.73	100	11_Fabids
218	Vigna angularis	0	0.64	17	0.01	0.02	0	0	0.02	0.13	4.16	0.03	0.39	0.03	2.42	21.6	46.45	100	11_Fabids
219	Vigna radiata	0	0.2	21.56	0	0.01	0	0	0	0.15	4.06	0.02	0.4	0.02	1.54	17.29	45.25	100	11_Fabids
220	Vigna unguiculata	0	0.41	25.02	0	0.02	0	0	0.08	0.92	8.89	0.22	0.4	0.05	2.21	16.72	54.94	100	11_Fabids
221	Quillaja saponaria	0.01	1.76	5.19	0	0.03	0	0	0.01	0.2	1.04	0.01	0.35	0.1	1.24	20.45	30.39	100	11_Fabids
222	Cannabis sativa	0.01	4.32	60.6	0	0.01	0	0.03	0.04	0.06	3.76	0	0.22	0.01	1.08	13.99	84.13	100	11_Fabids
223	Humulus lupulus	0	1.92	44.34	0.01	0.03	0	0	0.05	0.12	4.38	0	0.14	0	0.66	23.3	74.95	100	11_Fabids
224	Parasponia andersonii	0	0.7	30.3	0	0.01	0	0	0.04	0.34	6.06	0	0.29	0.06	1.28	21.02	60.1	100	11_Fabids
225	Trema orientale	0	0.9	19.66	0	0.01	0.01	0	0.14	0.46	6.91	0	0.39	0.02	1.58	18.99	49.07	100	11_Fabids
226	Artocarpus camansi	0	0.9	28.53	0.08	0.02	0	0	0	0.07	4.31	0.02	0.41	0.04	1.5	17.88	53.76	100	11_Fabids
227	Ficus carica	0	0.24	5.28	0.01	0.02	0	0	0.03	0.38	3.33	0.01	0.65	0.02	2.92	16.78	29.67	100	11_Fabids
228	Ficus erecta	0.02	0.9	17.57	0	0.19	0	0.07	0	1.16	11.64	0.21	0.67	0.03	2.97	13.91	49.34	100	11_Fabids
229	Morus notabilis	0	0.69	20.25	0.03	0.03	0	0.06	0.01	0.89	6.31	0.02	0.49	0	2.1	16.07	46.95	100	11_Fabids
230	Ochetophila trinervis	0	2.55	19.02	0.07	0	0	0	0.02	0.43	10.47	0	0.46	0.01	1.69	18.82	53.54	100	11_Fabids
231	Ziziphus jujuba	0	1.42	24.11	0.15	0.11	0.02	0.03	0.07	0.8	5.22	0.19	0.59	0.03	2.65	12.95	48.34	100	11_Fabids
232	Prunus avium	0.01	1.23	12.66	0.03	0.26	0.02	0	0.01	0.63	6.91	0.01	0.28	0	1.19	13.65	36.89	100	11_Fabids
233	Prunus dulcis	0	0.69	18.8	0	0.27	0.02	0	0	0.44	10.84	0.02	0.3	0.02	1.34	8.23	40.97	100	11_Fabids
234	Prunus mume	0	0.77	11.43	0	0.26	0	0.02	0.02	0.49	7.77	0.01	0.31	0.01	2.29	11.74	35.12	100	11_Fabids
235	Prunus persica	0	1.22	16.25	0	0.15	0	0.01	0	0.42	11.64	0.18	0.3	0.18	1.29	9.53	41.17	100	11_Fabids
236	Prunus yedoensis	0	1.4	15.63	0.01	0.34	0	0.01	0.04	0.83	11.59	0.33	0.29	0.15	1.2	13.09	44.91	100	11_Fabids
237	Malus baccata	0	2.95	30.18	0	0.52	0.06	0	0	0.49	8.83	0.02	0.21	0.01	0.85	6.92	51.04	100	11_Fabids
238	Malus domestica	0	1.37	11.4	0	0.24	0.02	0	0	0.24	3.93	0	0.09	0.01	0.33	2.55	20.18	100	11_Fabids
239	Pyrus betulifolia	0	1.16	27.37	0.04	0.62	0.08	0	0	0.58	9.15	0.03	0.23	0	0.99	5.19	45.44	100	11_Fabids
240	Pyrus x bretschneideri	0.02	1.04	30.55	0	0.63	0.07	0	0	0.58	9.8	0.11	0.24	0.01	1.12	6.28	50.45	100	11_Fabids
241	Pyrus ussuriensis x Pyrus communis	0	1.28	36.38	0	0.82	0.07	0	0	0.64	10.02	0.01	0.23	0	0.99	4.72	55.16	100	11_Fabids
242	Dryas drummondii	0	0.88	11.48	0	0.11	0	0.13	0.03	0.27	9.91	0.04	0.34	0.38	1.57	13.84	38.98	100	11_Fabids
243	Purshia tridentata	0	1.88	10.03	0	0.03	0	0.01	0.02	0.57	6.53	0.04	0.35	0.07	1.43	11.23	32.19	100	11_Fabids
244	Geum urbanum	0	2.21	35.67	0.03	0.01	0	0	0	0.63	13.22	0.07	0.11	0.33	0.62	14.47	67.37	100	11_Fabids
245	Fragaria nubicola	0.47	1.75	9.48	0	0.22	0.01	0	0	0.64	8.47	0.01	0.24	0.16	1.06	7.56	30.07	100	11_Fabids
246	Fragaria orientalis	0.71	1.79	9.44	0	0.22	0.02	0	0.08	0.6	8.49	0.01	0.23	0.19	0.95	9.32	32.05	100	11_Fabids
247	Fragaria vesca	0.01	1.5	10.03	0.04	0.2	0.01	0.23	0	0.41	8.54	0.02	0.23	0.12	1.02	5.91	28.27	100	11_Fabids
248	Fragaria x ananassa	0.46	1.68	21.38	0	0.28	0	0.04	0	0.19	10	0	0.18	0.03	0.8	8.67	43.71	100	11_Fabids
249	Rosa chinensis	0.02	2.95	28.56	0	0.14	0	0	0.01	0.47	7.43	0.02	0.22	0.18	1.01	13.44	54.45	100	11_Fabids
250	Rosa lucieae	0.01	2.71	29.01	0.02	0.1	0	0	0.01	0.64	8.71	0.09	0.21	0.26	0.93	13.02	55.72	100	11_Fabids
251	Rosa x damascena	0.01	3.41	26.38	0.04	0.17	0	0	0	0.52	7.63	0	0.21	0.24	0.86	11.16	50.63	100	11_Fabids
252	Boehmeria nivea	0	0.79	13.41	0	0.02	0	0	0	0.32	3.57	0.03	0.41	0.01	7.18	21.34	47.08	100	11_Fabids
253	Begonia fuchsioides	0	4.67	22.75	0	0	0	0	0	0.14	4.96	0.24	0.22	0.18	2.52	17.59	53.27	100	11_Fabids
254	Benincasa hispida	0	1.63	59.86	0	0.12	0	0	0.12	0	6.31	0.02	0.21	0.14	0.77	13.61	82.79	100	11_Fabids
255	Citrullus lanatus	0	1.51	17.78	0	0.21	0	0.14	0	0.03	4.02	0.01	0.48	0.2	1.73	33.25	59.36	100	11_Fabids
256	Cucumis melo	0.08	1.02	17.94	0	0.08	0	0	0.01	0.16	9.37	0.06	0.35	0.16	1.34	18.12	48.69	100	11_Fabids
257	Cucumis sativus	0	2.88	12.82	0.07	0.12	0	0	0.01	0.15	4.46	0.09	0.53	0.28	1.84	17.02	40.27	100	11_Fabids
258	Lagenaria siceraria	0	2.05	16	0	0.32	0	0	0	0.06	5.82	0.04	0.42	0.16	1.8	28.97	55.64	100	11_Fabids
259	Cucurbita argyrosperma	0	0.72	17.02	0	0.71	0.01	0	0	0.17	2.15	0.3	0.5	0.02	2.05	13.1	36.75	100	11_Fabids
260	Cucurbita moschata	0	0.82	23.73	0	1.99	0	0	0.11	0.58	1.74	0.15	0.41	0.43	2.9	15.27	48.13	100	11_Fabids
261	Momordica charantia	0.1	2.07	11.86	0	0.09	0	0	0	0.08	1.44	0.05	0.34	0.13	1.11	29.79	47.06	100	11_Fabids
262	Datisca glomerata	0	3.5	35.48	0	0.07	0	0.02	0.02	0.58	8.42	0.16	0.47	0.96	1.32	19.98	70.98	100	11_Fabids
263	Alnus glutinosa	0.01	3.99	14.03	0	0.1	0	0	0.09	0.28	4.65	0.01	0.34	0.08	1.45	25.48	50.51	100	11_Fabids
264	Betula nana	0	3.32	7.79	0	0.04	0.02	0	0	0.29	4.47	0.02	0.36	0.01	1.43	19.32	37.07	100	11_Fabids
265	Betula pendula	0.13	5.18	12.9	0.01	0.01	0.01	0	0.01	0.35	4.82	0.03	0.37	0.04	1.42	24.84	50.12	100	11_Fabids
266	Casuarina equisetifolia	0	2.38	16.37	0.05	0.02	0	0	0.13	1.02	0.82	0.15	0.2	0.02	0.77	10.91	32.84	100	11_Fabids
267	Casuarina glauca	0	2	9.94	0	0.01	0	0	0.01	0.82	0.05	0.09	0.22	0	0.79	18.51	32.44	100	11_Fabids
268	Castanea mollissima	0	3.13	21.7	0	0.08	0	0	0.04	0.5	5.22	0.03	0.32	0.03	1.62	19.79	52.46	100	11_Fabids
269	Fagus sylvatica	0.02	3.7	11.59	0.02	0.31	0	0	0.01	0.51	3.97	0.17	0.41	0.06	1.87	19.03	41.67	100	11_Fabids
270	Quercus lobata	0.02	3.91	16.83	0	0.03	0	2.14	0	0.52	5.01	0.28	0.37	0.11	1.93	25.12	56.27	100	11_Fabids
271	Quercus robur	0.16	3.68	19.68	0	0.04	0	0.83	0.01	0.54	4.81	0.01	0.36	0.08	1.75	23.83	55.78	100	11_Fabids
272	Quercus suber	0.15	4.11	19.46	0.03	0.19	0	0.45	0	0.28	4.37	0.01	0.38	0.05	1.8	22.74	54.02	100	11_Fabids
273	Juglans cathayensis	0	6.77	13.06	0	0.11	0	0.01	0.06	0.46	5.71	0	0.24	0.04	1.22	24.95	52.63	100	11_Fabids
274	Juglans hindsii	0.03	5.6	12.72	0.01	0.13	0	0.01	0	0.39	5.31	0.02	0.25	0.04	1.37	24.65	50.53	100	11_Fabids
275	Juglans mandshurica	0	6.81	13.78	0	0.11	0	0	0.06	0.41	5	0	0.29	0.21	1.34	24.54	52.55	100	11_Fabids
276	Juglans microcarpa	0	5.25	11.18	0	0.11	0	0	0.03	0.21	4.8	0.03	0.26	0.02	1.29	25.87	49.05	100	11_Fabids
277	Juglans microcarpa x Juglans regia	0	8.27	13.74	0	0.16	0	0.03	0.09	0.73	8.3	0	0.25	0.32	1.4	21.54	54.83	100	11_Fabids
278	Juglans nigra	0.06	6.13	12.41	0.02	0.18	0	0	0.04	0.18	5.44	0.04	0.25	0	1.27	23.83	49.85	100	11_Fabids
279	Juglans regia	0	6.16	11.83	0	0.12	0	0	0.05	0.3	5.84	0.41	0.26	0.92	1.47	24.17	51.53	100	11_Fabids
280	Juglans sigillata	0	6.24	11.39	0	0.11	0	0	0	0.27	4.98	0	0.25	0.03	1.27	21.83	46.37	100	11_Fabids
281	Pterocarya stenoptera	0	6.26	11.31	0	0.15	0	0	0.05	0.51	5.37	0.29	0.27	0.08	1.25	22.39	47.93	100	11_Fabids
282	Morella rubra	0.02	1.99	11.43	0.05	0.13	0	0.04	0.03	0.61	7.68	0.06	0.23	0	0.82	17.43	40.52	100	11_Fabids
283	Punica granatum	0.02	1.05	14.94	0.02	0.24	0.01	0.03	0	0.8	3.79	0.02	0.22	0.16	1.45	24.61	47.36	100	12_Malvids
284	Eucalyptus grandis	0	2.32	20.59	0	0.12	0	0.01	0	0.76	8.19	0	0.17	0.09	0.92	13.29	46.46	100	12_Malvids
285	Eucalyptus melliodora	0	2.42	24.71	0	0.1	0.01	0.04	0.02	0.63	9.11	0.11	0.21	0.06	1.05	11.01	49.48	100	12_Malvids
286	Eucalyptus pauciflora	0	2.08	22.36	0	0.22	0	0.02	0.02	1.16	10.85	0.05	0.2	0.11	0.89	12.3	50.26	100	12_Malvids
287	Gossypium darwinii	0	1.2	63.02	0	0	0	0	0	0.1	3.89	0.09	0.21	0.02	0.64	9.54	78.71	100	12_Malvids
288	Gossypium mustelinum	0	1.11	65.59	0	0	0	0	0	0.05	3.46	0.04	0.2	0	0.62	10.1	81.17	100	12_Malvids
289	Gossypium tomentosum	0	1.39	64.33	0	0.01	0.01	0	0	0.03	3.17	0.15	0.22	0	0.64	8.64	78.59	100	12_Malvids
290	Gossypium turneri	0	1.76	52.11	0	0	0	0	0	0.2	5.36	0.01	0.25	0	0.85	9.68	70.22	100	12_Malvids
291	Metrosideros polymorpha	0.01	1.19	11.34	0	0.13	0.02	0	0.02	0.4	13.16	0.12	0.17	0.06	0.99	14.73	42.34	100	12_Malvids
292	Rhodamnia argentea	0	0.76	16.48	0	0.11	0	0	0	0.54	9.94	0.14	0.17	0.16	1.02	10.45	39.77	100	12_Malvids
293	Psidium guajava	0	2.61	22.97	0	0.11	0	0	0.06	0.54	9.68	0.06	0.15	0.67	0.7	16.15	53.7	100	12_Malvids
294	Syzygium oleosum	0.02	1.14	20.02	0.01	0.1	0	0	0	0.48	10.31	0.05	0.15	0.02	0.78	10.22	43.3	100	12_Malvids
295	Azadirachta indica	0	0.71	12.15	0.02	0.02	0	0	0	0.8	5.07	0.05	0.38	0.01	1.66	14.89	35.76	100	12_Malvids
296	Atalantia buxifolia	0	1.62	17.33	0.05	0.05	0	0.05	0.1	0.58	5.45	0.02	0.25	0	1.13	16.25	42.88	100	12_Malvids
297	Citrus cavaleriei	0	1.82	19.26	0	0.08	0	0	0.09	0.6	5.34	0.01	0.26	0.02	1.16	14.96	43.6	100	12_Malvids
298	Citrus clementina	0	1.83	23.24	0.01	0.04	0	0.05	0.11	0.64	6.29	0.01	0.24	0.08	3.67	15.19	51.4	100	12_Malvids
299	Citrus hindsii	0	1.68	22.54	0.06	0.09	0	0.01	0.16	0.68	6.08	0.04	0.26	0.14	1.13	14.65	47.52	100	12_Malvids
300	Citrus maxima	0	1.67	26.77	0.09	0.19	0	0.03	0.06	0.91	6.27	1.73	0.24	0.21	1.13	13.56	52.86	100	12_Malvids
301	Citrus medica	0.01	1.43	23.54	0	0.02	0	0.01	0.07	0.57	5.32	0.02	0.23	0	1.57	11.6	44.39	100	12_Malvids
302	Citrus reticulata	0.09	1.48	15.35	0	0	0	0	0	0.79	2.05	0.01	0.26	0.09	1.67	27.65	49.44	100	12_Malvids
303	Citrus sinensis	0.02	1.66	20	0.05	0.03	0	0.01	0.04	0.69	5.59	0.02	0.23	0.1	1.19	17.22	46.85	100	12_Malvids
304	Citrus unshiu	0	1.42	19.58	0	0.03	0.01	0	0.09	0.57	4.56	0	0.26	0.14	1.09	15.37	43.12	100	12_Malvids
305	Citrus x paradisi x Citrus trifoliata	0.03	2.22	15.86	0.01	0.03	0	0	0.01	0.53	4.47	0	0.28	0	1.05	13.86	38.35	100	12_Malvids
306	Acer yangbiense	0.02	2.73	40.47	0	0.12	0	0	0.05	0.42	7.65	0	0.3	0	1.65	17.56	70.97	100	12_Malvids
307	Xanthoceras sorbifolium	0	4.57	29.85	0.02	0.06	0	0	0.16	0.22	7.27	0.07	0.29	0.05	1.43	24.71	68.7	100	12_Malvids
308	Herrania umbratica	0	0.88	18.61	0.03	0	0	0	0	0.25	4.05	0	0.28	0	0.89	13.27	38.26	100	12_Malvids
309	Corchorus capsularis	0	2.83	22.8	0	0.01	0	0.04	0	0.52	5.5	0.08	0.27	0.2	1.04	17.91	51.2	100	12_Malvids
310	Corchorus olitorius	0	2.19	23.91	0	0.02	0	0	0.02	0.35	4.01	0.06	0.26	0.1	1.26	16.39	48.57	100	12_Malvids
311	Durio zibethinus	0	2.19	29.22	0	0	0	0	0.1	1.35	4.37	0.52	0.37	0.22	1.16	15.77	55.27	100	12_Malvids
312	Gossypioides kirkii	0.08	2.6	38.94	0	0.01	0	0	0.02	0.33	5.15	0.39	0.28	0.02	0.89	13.77	62.48	100	12_Malvids
313	Gossypium arboreum	0	0.78	61.59	0	0.01	0	0	0	0	1.7	0.03	0.16	0	0.53	9.97	74.77	100	12_Malvids
314	Gossypium barbadense	0	1.04	48.22	0	0	0	0	0.04	0.02	2.94	0.09	0.2	0	0.81	9.83	63.19	100	12_Malvids
315	Gossypium hirsutum	0	1.06	59.38	0	0.03	0	0.03	0.03	0.06	2.75	0.03	0.2	0	0.65	11.41	75.63	100	12_Malvids
316	Gossypium raimondii	0	1.59	45.79	0	0.11	0	0.01	0.03	0.14	5.44	0.1	0.25	0.02	0.84	12.12	66.44	100	12_Malvids
317	Gossypium thurberi	0	1.62	39.49	0	0.06	0	0	0	0.02	3.59	0.02	0.26	0	0.85	13.42	59.33	100	12_Malvids
318	Hibiscus syriacus	0.04	2.31	38.04	0	0.12	0	0.02	0.03	0.08	6.03	0	0.2	0.19	0.77	20.83	68.66	100	12_Malvids
319	Kokia drynarioides	0	2.53	37.99	0.02	0.04	0	0.01	0	0.1	3.75	0.01	0.29	0	0.9	14.25	59.89	100	12_Malvids
320	Aquilaria agallochum	0	1.94	31.68	0	0.02	0.07	0	0.18	0.43	6.88	0.03	0.14	0.02	0.56	21.08	63.03	100	12_Malvids
321	Aquilaria sinensis	0.04	1.53	35.77	0.02	0.03	0.04	0.01	0	0.32	6	0.08	0.15	0	0.72	24.42	69.13	100	12_Malvids
322	Aethionema arabicum	0	1.75	11.7	0.09	0.05	0	0.06	0.04	0.48	6.16	0	0.47	0.03	1.74	9.96	32.53	100	12_Malvids
323	Arabis alpina	0	3.69	25.65	0	0.22	0.05	0.02	0.03	2.03	7.79	0.01	0.18	0.16	0.66	12.94	53.43	100	12_Malvids
324	Arabis nordmanniana	0	2.4	10.07	0	0.25	0.03	0.01	0.05	0.61	4.15	0	0.29	0.03	1.19	6.54	25.62	100	12_Malvids
325	Aurinia saxatilis	0.07	5.98	24.41	0	0.17	0.04	0.01	0.01	0.98	7.28	0.01	0.19	0.12	0.79	16.28	56.34	100	12_Malvids
326	Odontarrhena argentea	0	2.73	6.01	0	0.2	0.03	0.04	0.05	0.85	4.54	0	0.35	0.07	1.41	10.14	26.42	100	12_Malvids
327	Anastatica hierochuntica	0	6.21	37.17	0.02	0.31	0.07	0.06	0	0.82	8.45	0.03	0.2	0.07	0.66	11.38	65.45	100	12_Malvids
328	Biscutella auriculata	0	3.69	19.64	0.11	0.1	0.1	0	0	0.29	12.21	0	0.29	0.01	0.93	18.54	55.91	100	12_Malvids
329	Biscutella laevigata	0	3.83	17.76	0	0.26	0.02	0	0	0.52	9.38	0	0.26	0.03	0.9	18.17	51.13	100	12_Malvids
330	Boechera puberula	0	2	11.11	0.02	0.12	0.01	0	0.04	1.16	6.61	0	0.36	0.03	1.33	8.03	30.82	100	12_Malvids
331	Boechera stricta	0	1.89	10.79	0	0.12	0	0.01	0.01	1.17	5.97	0.01	0.28	0	1.11	7.06	28.42	100	12_Malvids
332	Schrenkiella parvula	0	1.97	7.08	0	0.2	0.02	0.07	0.02	0.88	3.83	0	0.37	0	1.2	4.54	20.18	100	12_Malvids
333	Brassica cretica	0	3.86	18.22	0	0.34	0.01	0	0	0.69	8.79	0	0.24	0.54	0.94	14.57	48.2	100	12_Malvids
334	Brassica juncea	0.06	2.28	11.16	0.02	0.27	0	0.01	0.01	0.45	5.6	0.05	0.24	0.08	0.88	9.57	30.68	100	12_Malvids
335	Brassica napus	0	3.74	17.09	0.02	0.42	0.02	0	0.14	0.69	9.3	0.22	0.23	0	0.89	10.86	43.62	100	12_Malvids
336	Brassica nigra	0	2.53	14.35	0	0.17	0.01	0	0.02	0.58	6.83	0	0.25	0	0.97	9.66	35.37	100	12_Malvids
337	Brassica oleracea	0	3.96	14.69	0	0.28	0.01	0	0.01	0.4	7.6	0.02	0.23	0.15	1.64	13.66	42.65	100	12_Malvids
338	Brassica rapa	0.02	3.27	6.69	0	0.32	0.01	0	0	0.55	6.49	0.05	0.28	0.19	1.07	14.04	32.98	100	12_Malvids
339	Erucastrum elatum	0	3.54	7.39	0	0.55	0.06	0	0	1.72	7.46	0.01	0.31	0.17	1.1	11.54	33.85	100	12_Malvids
340	Raphanus raphanistrum	0.01	3.36	7.44	0.04	0.48	0.03	0	0	0.7	6.72	0.01	0.33	0.24	1.13	11.76	32.25	100	12_Malvids
341	Raphanus sativus	0	3.12	7.85	0	0.35	0.04	0	0.01	0.62	5.8	0.01	0.28	0.31	1.01	10.68	30.08	100	12_Malvids
342	Arabidopsis halleri	0	2.64	7.59	0.01	0.31	0.08	0	0	2.7	5.58	0.01	0.27	0.09	0.94	5.28	25.5	100	12_Malvids
343	Arabidopsis lyrata	0	2.29	10.24	0	0.24	0.07	0	0	4.62	5.13	0.04	0.29	0.07	1.04	5.51	29.54	100	12_Malvids
344	Arabidopsis thaliana	0	0.95	5.66	0.07	0.12	0.02	0	0	2.02	3.05	0.03	0.35	0.57	1.16	2.58	16.58	100	12_Malvids
345	Camelina sativa	0.01	3.02	14.68	0	0.1	0.03	0	0.01	2.7	4.72	0	0.31	0.32	1.23	6.76	33.89	100	12_Malvids
346	Capsella bursa-pastoris	0.02	1.52	4.99	0	0.14	0.03	0.01	0.01	1.56	3.69	0	0.35	2.13	1.27	4.28	20	100	12_Malvids
347	Capsella rubella	0.01	1.46	5.74	0	0.15	0.02	0	0	2.16	3.72	0.01	0.39	1.34	1.49	4.45	20.94	100	12_Malvids
348	Barbarea vulgaris	0	1.64	8.47	0	0.2	0.01	0.01	0.02	1.03	3.51	0	0.37	0.04	1.34	5.61	22.25	100	12_Malvids
349	Leavenworthia alabamica	0.09	1.68	9.95	0	0.35	0.01	0	0.02	0.7	6.06	0.01	0.34	0.12	1.39	6.02	26.74	100	12_Malvids
350	Nasturtium officinale	0	1.22	11.64	0	0.06	0	0	0	0.32	4.4	0.04	0.34	0	1.4	6.15	25.57	100	12_Malvids
351	Noccaea caerulescens	0.13	0.91	10.1	0	0.11	0	0	0	0.95	3.72	0.01	0.35	0	1.29	5.01	22.58	100	12_Malvids
352	Noccaea goesingensis	0	2.33	5.63	0.01	0.22	0.08	0.01	0.01	0.69	2.79	0.01	0.37	0.05	1.24	7.1	20.54	100	12_Malvids
353	Raparia bulbosa	0	1.62	10.02	0	0.19	0.08	0	0	0.71	3.97	0.01	0.37	0.04	1.4	7.16	25.57	100	12_Malvids
354	Conringia planisiliqua	0	1.44	16.72	0	0.25	0	0.04	0.01	0.57	4.27	0.27	0.3	0.01	1.24	9.52	34.64	100	12_Malvids
355	Cochlearia officinalis	0	1.4	6.4	0.03	0.2	0.02	0	0.01	1.15	11.05	0.07	0.41	0.22	1.51	13.74	36.21	100	12_Malvids
356	Crucihimalaya himalaica	0	3.02	22.91	0	0.08	0.01	0	0.14	1.5	10.75	0	0.23	0.06	1	9.34	49.04	100	12_Malvids
357	Erysimum cheiri	0	1.95	4.84	0	0.29	0.06	0	0	1.42	3.19	0.01	0.42	0.08	1.44	4.11	17.81	100	12_Malvids
358	Erysimum pusillum	0	1.69	4.34	0	0.2	0.01	0.04	0	1.18	2.6	0.01	0.42	0.04	1.38	4.04	15.95	100	12_Malvids
359	Euclidium syriacum	0	2.56	20.06	0	0.18	0	0.01	0	1.56	4.84	0.14	0.26	0.05	0.88	10.64	41.18	100	12_Malvids
360	Eutrema heterophyllum	0.03	2.57	25.52	0	0.16	0.05	0	0	1.28	10.2	0.01	0.25	0.08	0.85	11.08	52.08	100	12_Malvids
361	Eutrema salsugineum	0	2.11	30.66	0	0.13	0	0.06	0	1.67	5.3	0	0.24	0.14	0.83	10.39	51.53	100	12_Malvids
362	Eutrema yunnanense	0	2.67	32.81	0.02	0.27	0.03	0.01	0	1.62	9.26	0.08	0.2	0.02	0.71	9.65	57.35	100	12_Malvids
363	Iberis amara	0.02	6.19	13.1	0.02	0.26	0.03	0	0.01	0.96	9.28	0	0.29	0.02	1.12	14.32	45.62	100	12_Malvids
364	Iberis pinnata	0	6.35	33.52	0	0.31	0.04	0	0	0.61	11.88	0	0.2	0.16	0.82	11.55	65.44	100	12_Malvids
365	Isatis lusitanica	0	2.37	9.72	0	0.13	0.04	0.02	0	1.24	3.78	0	0.33	0	1.04	6.65	25.32	100	12_Malvids
366	Isatis tinctoria	0	3.99	9.99	0	0.24	0.05	0	0	1.48	4.84	0	0.33	0.01	1.1	10.07	32.1	100	12_Malvids
367	Kernera saxatilis	0	1.85	5.5	0	0.1	0.07	0.03	0	0.64	3.61	0.03	0.41	0	1.43	3.96	17.63	100	12_Malvids
368	Lepidium africanum	0	5.23	20.75	0	0.05	0	0	0	2.12	8.05	0	0.28	0	1.01	7.41	44.9	100	12_Malvids
369	Lepidium aucheri	0	5.71	29.04	0	0.05	0	0	0	3.19	8.94	0	0.3	0.01	0.84	10.37	58.45	100	12_Malvids
370	Sisymbrium altissimum	0	2.25	12.7	0	0.11	0.01	0	0	1.02	5.59	0	0.37	0	1.24	7.05	30.34	100	12_Malvids
371	Sisymbrium irio	0	2.06	11.68	0	0.07	0.01	0	0	0.87	3.75	0	0.25	0.03	0.81	11.67	31.2	100	12_Malvids
372	Macropodium nivale	0	2.17	14.74	0	0.08	0.12	0	0	0.7	4.27	0.02	0.29	0.04	1.17	6.89	30.49	100	12_Malvids
373	Pseudoturritis turrita	0	3.39	28.36	0	0.25	0.11	0.09	0	0.8	10.99	0.14	0.26	0	0.93	10.06	55.38	100	12_Malvids
374	Turritis glabra	0	2.39	12.35	0	0.08	0.02	0	0	1.76	5.72	0	0.36	0.04	1.33	2.73	26.78	100	12_Malvids
375	Thlaspi arvense	0.01	1.37	41.32	0	0.03	0.01	0.02	0	1.28	3.08	0.02	0.18	0.23	0.62	11.04	59.21	100	12_Malvids
376	Carica papaya	0	2.23	28.33	0.04	0.01	0	0	0.01	0	1.28	0.05	0.24	1.34	1.18	6.69	41.4	100	12_Malvids
377	Tarenaya hassleriana	0	0.72	24.56	0	0.1	0	0	0	0.1	4.38	0.07	0.24	0.08	1.59	9.65	41.49	100	12_Malvids
378	Santalum album	0.02	1.59	6.84	0	0.14	0	0	0	0.24	3.26	0.13	0.36	0	1.52	16.91	31.01	100	13_Super_asterids
379	Amaranthus hypochondriacus	0	1.56	2.09	0	0.09	0	0	0	0.06	1.19	0	0.13	0.01	0.45	6.86	12.44	100	13_Super_asterids
380	Carnegiea gigantea	0	3.6	38.71	0	0.21	0.03	0.04	0.03	0.51	7.27	0.01	0.17	0.06	0.78	13.93	65.35	100	13_Super_asterids
381	Lophocereus schottii	0.33	3.96	33.01	0	0.2	0	0	0	0.97	5.96	0	0.17	0.14	0.65	17.66	63.05	100	13_Super_asterids
382	Pachycereus pringlei	0	3.27	28.71	0	0.22	0	0	0.04	0.35	6.01	0	0.15	0.26	0.55	17.45	57.01	100	13_Super_asterids
383	Stenocereus thurberi	0.03	4.98	34.86	0	0.15	0	0	0.09	0.76	6.1	0.01	0.18	0.09	0.68	17.78	65.71	100	13_Super_asterids
384	Pereskia humboldtii	0.01	3.56	8.54	0	0.02	0	0	0	0.2	1.27	0	0.21	0.12	0.83	28.86	43.62	100	13_Super_asterids
385	Dianthus caryophyllus	0	1.86	16.16	0	0.13	0.02	0	0.08	0.37	4.5	0	0.24	0.02	1.44	24.91	49.73	100	13_Super_asterids
386	Silene latifolia	0	3.52	7.95	0	0.28	0	0	0.02	0.13	2.07	0	0.15	0.23	0.69	14.48	29.52	100	13_Super_asterids
387	Beta vulgaris	0.04	3.39	15.27	0.15	0.18	0	0.05	0.01	0.2	6.22	0.03	0.2	0.03	1.43	23.18	50.38	100	13_Super_asterids
388	Beta patula	0.02	3.05	8.15	0	0.13	0	0	0.03	0.19	3.36	0	0.18	0.02	0.73	17.44	33.3	100	13_Super_asterids
389	Bassia scoparia	0.01	3.25	20.8	0.05	0.01	0	0	0.08	0.46	5.24	0.03	0.24	0.15	1.24	15.26	46.82	100	13_Super_asterids
390	Spinacia oleracea	0	2.02	36.78	0	0.06	0	0.06	0.02	0.58	9.14	0.03	0.13	0.04	0.8	19.9	69.56	100	13_Super_asterids
391	Chenopodium pallidicaule	0	1.44	26.01	0.05	0.05	0	0	0.09	0.02	7.98	0.3	0.25	0.07	1.12	16.21	53.59	100	13_Super_asterids
392	Chenopodium quinoa	0	1.32	35.39	0.01	0.02	0	0.01	0	0.03	5.25	0.07	0.23	0.19	1.15	21.4	65.07	100	13_Super_asterids
393	Chenopodium suecicum	0.04	2.13	28.58	0.03	0.01	0	0.03	0.17	0.09	7.62	0.02	0.24	0.15	1.39	17.36	57.86	100	13_Super_asterids
394	Drosera capensis	0.11	1.12	15.93	0	0.12	0	0	0	0.15	1.75	0.02	0.22	1.97	0.87	14.12	36.38	100	13_Super_asterids
395	Fagopyrum esculentum	0	3.25	45.92	0.06	0.25	0.14	0.01	0	0.87	3.32	0.18	0.08	0.03	0.36	12.2	66.67	100	13_Super_asterids
396	Fagopyrum tataricum	0	4.44	31.52	0	0.09	0	0	0.03	0.25	4.49	0.6	0.15	0.02	0.86	15.56	58.01	100	13_Super_asterids
397	Nyssa sinensis	0	8.17	27.82	0	0.12	0	0.01	0.77	0.05	14.62	0.04	0.23	1.5	1.37	16.63	71.33	100	13_Super_asterids
398	Actinidia chinensis	0.01	0.77	12.67	0	0.41	0.03	0.01	0.01	0.12	5.48	0.01	0.28	0.05	1.1	20.96	41.91	100	13_Super_asterids
399	Actinidia eriantha	0.01	0.8	15.7	0	0.27	0	0	0.02	0.35	5.97	0.02	0.29	0	1.14	21.15	45.72	100	13_Super_asterids
400	Monotropa hypopitys	0	1.4	44.2	0	0.06	0	0	0	0.32	4.63	0	0.08	0.06	0.31	37.08	88.14	100	13_Super_asterids
401	Vaccinium macrocarpon	0	2.35	9.42	0.01	0.6	0	0.03	0	0.29	5.78	0	0.19	0.35	0.9	23.35	43.27	100	13_Super_asterids
402	Embelia ribes	0	1.25	20.31	0.07	0.27	0	0	0	0.15	7.59	0.09	0.23	0.06	1.07	23.66	54.75	100	13_Super_asterids
403	Primula veris	0	1.16	6.03	0.01	0.09	0	0.08	0	0.03	4.11	0.01	0.19	0.15	0.86	17.51	30.23	100	13_Super_asterids
404	Argania spinosa	0	3.14	14.38	0.11	0.21	0	0.01	0.13	0.3	3.34	0.06	0.4	0.02	1.76	25.97	49.83	100	13_Super_asterids
405	Camellia sinensis	0	1.4	39.07	0	0.04	0	0.03	0.04	0.53	3.78	0.03	0.24	1.41	1.47	31.23	79.27	100	13_Super_asterids
406	Andrographis paniculata	0	0.41	18.63	0	0.35	0	0	0.12	0.22	6.25	0.11	0.41	0.05	2.39	27.19	56.13	100	14_Lamiids
407	Handroanthus impetiginosus	0	0.85	15.03	0	0.02	0	0	0.01	0.98	5.42	0.03	0.33	0.04	1.37	28.68	52.76	100	14_Lamiids
408	Dorcoceras hygrometricum	0	0.11	60.32	0	0	0	0	0	1.93	1.52	0	0.02	0.07	0.17	19.27	83.41	100	14_Lamiids
409	Pogostemon cablin	0	1.32	26.15	0.05	0	0	0.39	0.03	0.66	4.09	0.09	0.23	0	1.12	21.79	55.92	100	14_Lamiids
410	Scutellaria baicalensis	0	0.44	18.8	0.31	0	0	0	0.01	1.42	13.21	0.01	0.23	0.03	1.35	23.95	59.76	100	14_Lamiids
411	Perilla citriodora	0	0.83	27.6	0	0.34	0	0	0.23	0.29	6.5	0	0.22	0.06	1.37	28.68	66.12	100	14_Lamiids
412	Salvia splendens	0.01	2.33	26.18	0.01	0.02	0	0	0	0.33	12.32	0.07	0.17	0.12	1.07	17.94	60.57	100	14_Lamiids
413	Genlisea aurea	0	0.33	0.23	0	0	0	0.01	0	0.07	1.64	0	0.36	0.01	2.42	11.08	16.15	100	14_Lamiids
414	Utricularia gibba	0	0.11	14.95	0.04	0	0	0.03	0	0.05	1.72	2.82	0.17	0	0.75	11.5	32.14	100	14_Lamiids
415	Lindernia brevidens	0.01	4.08	30.9	0.01	0.09	0	0	0	0.23	6.25	0.14	0.13	0.55	0.96	16.29	59.64	100	14_Lamiids
416	Olea europaea	0	0.72	28.29	0	0.07	0	0	0.04	0.29	3.79	0.04	0.15	0.08	0.64	16.14	50.25	100	14_Lamiids
417	Striga asiatica	0.01	2.83	26.91	0	0.07	0	0	0	1.07	7.48	0.02	0.23	0.01	1.13	21.37	61.13	100	14_Lamiids
418	Sesamum indicum	0.04	3.61	13.6	0.07	0.03	0	0	0	0.19	5.29	0.13	0.22	0	1.15	23.34	47.67	100	14_Lamiids
419	Penstemon barbatus	0	1.92	32.87	0.38	0.07	0	0	0	0.36	6.18	0.2	0.16	0.02	0.95	23.43	66.54	100	14_Lamiids
420	Cuscuta australis	0.12	2.74	25.95	0.07	0.04	0	0	0	1.1	9.29	0.18	0.17	0.08	1.38	24.11	65.23	100	14_Lamiids
421	Cuscuta campestris	0	2.58	15.46	0.26	0.06	0	0	0.03	1.13	8.53	0.08	0.19	0.23	1.18	24.89	54.62	100	14_Lamiids
422	Ipomoea batatas	0	2.41	8.86	0	0.71	0	0.01	0	0.72	5.69	0	0.27	0	1.51	25.75	45.93	100	14_Lamiids
423	Ipomoea nil	0.14	3.74	29.73	0	0.95	0	0.05	0	0.92	9.01	2.45	0.21	0.1	2.22	22.58	72.1	100	14_Lamiids
424	Ipomoea trifida	0.01	1.78	11.08	0	0.81	0	0	0.01	0.93	6.48	0.07	0.24	0.05	1.77	26.04	49.27	100	14_Lamiids
425	Ipomoea triloba	0.03	1.94	17.84	0.01	0.81	0	0.1	0	0.95	6.7	0.1	0.26	0.23	1.69	23.12	53.78	100	14_Lamiids
426	Nicotiana attenuata	0	1.58	58.72	0.11	0.22	0	0	0	0.42	3.66	0.08	0.07	0.21	0.46	5.58	71.11	100	14_Lamiids
427	Nicotiana glauca	0	1.52	68.95	0	0.15	0	0	0	0.49	3.8	0	0.08	0.1	0.34	4.47	79.9	100	14_Lamiids
428	Nicotiana knightiana	0	1.56	61.75	0	0.14	0.01	0.01	0	0.4	3.88	0.02	0.07	1.18	2.78	8.76	80.56	100	14_Lamiids
429	Nicotiana obtusifolia	0	2.98	57.83	0.03	0.29	0.01	0.01	0	0.62	5.18	0.07	0.1	0.47	0.48	7.26	75.33	100	14_Lamiids
430	Nicotiana paniculata	0	1.82	63.26	0	0.17	0.01	0	0	0.37	3.69	0.01	0.07	2.14	0.45	8.41	80.4	100	14_Lamiids
431	Nicotiana tabacum	0	1.46	61.98	0.02	0.25	0	0	0	0.51	3.43	0.01	0.09	0.5	0.4	6.95	75.6	100	14_Lamiids
432	Nicotiana undulata	0.03	1.83	64.05	0	0.22	0	0.06	0	0.31	3.71	0	0.07	0.18	0.43	10.21	81.1	100	14_Lamiids
433	Capsicum annuum	0	2.14	63.93	0	0.27	0	0.06	0	0.11	7.39	0.06	0.11	0.01	0.48	6.61	81.17	100	14_Lamiids
434	Capsicum baccatum	0	2.39	58.55	0	0.29	0.11	0	0	0.18	6.35	0.67	0.11	0.31	0.51	13.16	82.63	100	14_Lamiids
435	Capsicum chinense	0.01	1.84	52.1	0	0.26	0.01	0	0.06	0.18	7.35	0.04	0.11	0.62	0.46	18.56	81.6	100	14_Lamiids
436	Jaltomata sinuosa	0.02	1.86	59.5	0	0.32	0.01	0	0	0.14	6.06	0.03	0.11	0.03	0.43	14.91	83.42	100	14_Lamiids
437	Solanum arcanum	0	1.81	40.2	0	0.3	0.48	0	0.01	0.22	6.77	0.05	0.19	0.16	0.87	7.38	58.44	100	14_Lamiids
438	Solanum chilense	0	2.24	36.83	0	0.19	0.15	0	0	0.06	6.09	0.01	0.15	0.01	0.6	3.84	50.17	100	14_Lamiids
439	Solanum habrochaites	0	1.7	44.24	0	0.23	0.51	0	0.01	0.22	6.72	0.03	0.19	0	0.8	6.61	61.26	100	14_Lamiids
440	Solanum lycopersicum	0	1.55	43.66	0	0.2	0.4	0	0	0.06	6.01	0.03	0.16	0	0.76	5.86	58.69	100	14_Lamiids
441	Solanum pennellii	0	1.87	47.94	0	0.4	0.4	0	0	0.22	6.11	0.02	0.15	0.08	1.54	5.7	64.43	100	14_Lamiids
442	Solanum melongena	0	3.22	51.24	0	0.29	0.06	0	0	0.12	4.36	0.03	0.14	0.06	0.59	10.84	70.95	100	14_Lamiids
443	Asclepias syriaca	0	2.09	32.53	0.15	0.08	0	0	0.02	0.28	0.98	0.26	0.18	0.04	0.64	25.19	62.44	100	14_Lamiids
444	Calotropis procera	0	1.14	7.97	0	0	0	0	0	0.02	0.51	0.01	0.31	0	1.39	7.07	18.42	100	14_Lamiids
445	Rhazya stricta	0	0.7	23.2	0.01	0.03	0	0	0.13	0.29	3.2	0.05	0.21	0	0.7	16.34	44.86	100	14_Lamiids
446	Catharanthus roseus	0.01	2.29	25.25	0	0.04	0	0.24	0.11	0.2	8.47	0.06	0.22	0.01	0.95	29.11	66.96	100	14_Lamiids
447	Coffea arabica	0.02	1.57	41.34	0	0.07	0	0.03	0.05	0.39	3.34	0	0.16	0.11	0.63	19.27	66.98	100	14_Lamiids
448	Coffea canephora	0	1.4	25.87	0	0.04	0	0	0.04	0.4	2.87	0	0.15	0.03	0.73	15.82	47.35	100	14_Lamiids
449	Coffea eugenioides	0.04	1.59	41.37	0	0.06	0	0	0	0.68	3.36	0.02	0.15	0.12	0.6	18.9	66.89	100	14_Lamiids
450	Echium plantagineum	0	3.01	6.68	0	1.03	0	0.03	0.05	0.21	6.88	0.28	0.16	0.15	0.82	19.3	38.6	100	14_Lamiids
451	Mikania micrantha	0.03	1.24	55.23	0	0.08	0	0.08	0.04	0.2	7.77	0	0.13	0.08	0.81	16.41	82.1	100	15_Campanulids
452	Artemisia annua	0	2.46	29.56	0.09	0.04	0	0	0	0.86	4.12	0	0.14	0.02	1.09	21.79	60.17	100	15_Campanulids
453	Erigeron canadensis	0	1.82	5.46	0	0.45	0	0	0	0.85	2.81	0	0.24	0	1.44	26.44	39.51	100	15_Campanulids
454	Helianthus annuus	0.02	1.42	52.15	0.05	0.06	0	0.01	0	0.53	3.2	0.03	0.1	0.42	0.76	25.65	84.4	100	15_Campanulids
455	Cynara cardunculus var. scolymus	0.16	1.5	28.35	0.11	0.14	0	0.04	0.64	0.41	6.45	0.05	0.11	0.17	1.05	27.4	66.58	100	15_Campanulids
456	Lactuca sativa	0	1.04	49.83	0	0.5	0	0.17	0.01	0.09	3.21	0	0.1	1.02	0.64	30.49	87.1	100	15_Campanulids
457	Codonopsis pilosula	0.02	3.67	26.87	0	0.1	0	0.08	0.02	1	8.19	0.01	0.16	0	1.13	27.63	68.88	100	15_Campanulids
458	Platycodon grandiflorus	0	2.89	24.11	0.09	0.09	0	0	0.01	0.44	11	0.01	0.22	0	1.39	20.62	60.87	100	15_Campanulids
459	Daucus carota	0	0.94	12.93	0.04	0.04	0	0	0.01	0.46	6.74	0.03	0.19	0.04	0.87	18.47	40.76	100	15_Campanulids

## Sheet: 2c length_percentage_repeat
Supplementary Table 2c The percentage of repeat length in total repeat length
Calculation method: The actual length of each repeat sequence was list in Supplementary Table 2a, length percentage in repeat = the length of repeat / whole repeat length
NO	Species name	DIRS	LINE	LTR	PLE	SINE	unknown	Circular_dsDNA	DNA_Polymerase	Rolling_Circle	TIR	RNA	Low_complexity	Satellite	Simple_repeat	Unknown	Total_repeat_percentage	species_type
1	Chloropicon primus	0	0	0.25	0	0	0	0	0	0	9.72	0	9.56	0	49.07	31.39	100	01_Alage
2	Edaphochlamys debaryana	0.33	9.76	3.44	0.14	0.14	0	0	0	1.9	1.39	0	8.15	0	35.69	39.06	100	01_Alage
3	Bathycoccus prasinos	0	0	1.52	0.98	0	0	0	6.5	0	6.4	0	10.84	0	50.02	23.74	100	01_Alage
4	Ostreococcus tauri	0	0.22	0	0	0	0	0	0	2.15	3.3	0	1.55	0.65	57.14	34.99	100	01_Alage
5	Micromonas	3.64	0.27	5.46	0.2	0	0	4.29	0	2.78	16.97	0	0.51	0	27.74	38.14	100	01_Alage
6	Micromonas commoda	0	0	0.73	0	0	0	0	0	0.15	0	0	1.02	0	13.46	84.65	100	01_Alage
7	Micromonas pusilla	0	0	0.2	0	0	0	0	0.4	0	3.12	0	4.37	0	58.09	33.81	100	01_Alage
8	Bathycoccus	0	0	0.25	0	0	0	0.08	0	0	0.4	0	1.77	0	55.21	42.29	100	01_Alage
9	unclassified Mamiellophyceae	0.33	3.93	3.78	0.5	0.75	0	1.51	1.64	0	22.22	0	7.56	0.49	51.53	5.75	100	01_Alage
10	Cymbomonas tetramitiformis	0	0	0	0	0	0	0	0	0	0	0	4.41	0	39.36	56.23	100	01_Alage
11	Chlamydomonas	3.8	5.74	8.01	0.25	0.21	0	0.14	0.1	0.13	3.53	0	0.29	0.06	3.14	74.59	100	01_Alage
12	Chlamydomonas applanata	0	0.98	0.41	0	0.08	0	0	0	0.18	1.22	0	12.74	0	49.77	34.63	100	01_Alage
13	Chlamydomonas applanata	0.11	16.78	7.31	0	0	0	0.13	0	0	0.89	0	4.33	0	38.59	31.85	100	01_Alage
14	Chlamydomonas asymmetrica	0.02	12.51	3.39	0.34	0	0	0	0	0.3	4.81	0	1.06	0.06	19.94	57.58	100	01_Alage
15	Chlamydomonas debaryana	0.2	10.8	4.9	0	0.2	0	0	0	1.93	1.38	0	8.14	0	35.62	36.83	100	01_Alage
16	Chlamydomonas eustigma	0	9.36	20.95	0	0	0	0	0.18	2.31	0.12	0	1.03	0	11.93	54.12	100	01_Alage
17	Chlamydomonas reinhardtii	0.04	21.61	1.98	0.15	0.57	0	0	0.31	1.72	12.73	0.07	2.93	1.38	27.64	28.87	100	01_Alage
18	Chlamydomonas sphaeroides	0.57	11.52	4.09	0.33	0.02	0	0	0	0.05	0.46	0	5.22	0	37.53	40.22	100	01_Alage
19	Chloromonas	0.12	6.26	1.61	0	0.02	0	0.35	1.43	0	3.36	0.16	0.86	0.61	12.7	72.51	100	01_Alage
20	Eudorina	0.73	18.8	5.97	0.71	2.63	0	0	0.07	3.88	15.48	5.27	1.13	0.63	14.09	30.62	100	01_Alage
21	Gonium pectorale	0.95	9.72	5.04	0.22	0.27	0	0	0	0.42	2.67	0	4.05	0	25.39	51.28	100	01_Alage
22	Volvox carteri	3.62	16.44	14.37	0.1	1.1	0	0.22	0.37	2.82	8.91	0.74	1.43	0.75	17.03	32.1	100	01_Alage
23	Yamagishiella unicocca	0.73	16.02	9.19	0.1	0.79	0	0	0	0.35	7.5	2.52	1.23	0.4	10.7	50.46	100	01_Alage
24	Haematococcus	0	19.11	4.08	2.17	0.16	0	2.57	0	0	2.14	0	4.19	0.11	37.16	28.32	100	01_Alage
25	Haematococcus lacustris	0.12	14.26	10.38	0.08	0.05	0	0.48	0.1	0.94	4.31	0	1.49	0.08	13.29	54.42	100	01_Alage
26	Characiochloris	0.13	5.69	1.29	0.18	0.01	0	0	0.58	0	2.92	0.45	0.84	0.11	12.63	75.19	100	01_Alage
27	Dunaliella	0	8.3	2.2	0	0	0	0	0	0	28.69	0	1.6	0	34.76	24.45	100	01_Alage
28	Dunaliella salina	0.06	36.56	4.12	0.16	0.01	0	0	0	0.11	3.01	0.05	0.19	0.1	6.47	49.15	100	01_Alage
29	Tetrabaena socialis	0	8.55	1.83	0.07	0	0	0	0	0.75	6.14	0	2.88	0.18	23.4	56.19	100	01_Alage
30	Mychonastes homosphaera	0	0	5.08	0	0	0	0	0	0	0.62	0	6.21	0	86.03	2.06	100	01_Alage
31	Messastrum gracile	0	1.53	1.19	0	0	0	0	0	0	3.47	0	10.1	0.18	72.44	11.1	100	01_Alage
32	Monoraphidium	0	53	13.35	0.03	0.2	0	0.26	0.23	0	1.35	0	0.2	0	9.03	22.35	100	01_Alage
33	Monoraphidium neglectum	0	10.08	0.06	0	0	0	0	0	0	20.54	0	2.85	0	56.92	9.55	100	01_Alage
34	Raphidocelis subcapitata	0.03	1.76	0.52	0	0	0	0	0	0	0.4	0	7.25	0	75.48	14.56	100	01_Alage
35	Desmodesmus armatus	0.55	33.37	5.71	0.27	1.27	0	0.34	0.43	0.01	5.69	0.74	1.4	0.15	16.76	33.3	100	01_Alage
36	Scenedesmus	0.08	50.94	9.81	0	0.01	0	0.07	0	0.03	1.64	0	0.23	0.02	30.02	7.13	100	01_Alage
37	Scenedesmus quadricauda	0	4.3	0.21	0	0.22	0	0	0	0	10.09	0.19	2.36	0	68.99	13.65	100	01_Alage
38	Scenedesmus vacuolatus	0	59.95	12.32	0	0	0	0	0	0	0	0	0.35	0	20.45	6.93	100	01_Alage
39	Coelastrella	0	44.02	5.2	0	0.09	0	0	0	0	1.7	0	0.26	0	15.23	33.49	100	01_Alage
40	Tetradesmus obliquus	0.18	52.6	2.82	0	0	0	0.04	0.01	0.35	2.08	0	0.21	0	33	8.71	100	01_Alage
41	Tetraselmis striata	9.88	13.51	10.53	0.01	0.05	0	0.06	0.13	0.99	6.56	0.02	0.36	0.11	3.72	54.06	100	01_Alage
42	Picocystis	0.2	2.7	49.83	0	0.18	0	0.99	0.06	0	17.05	1.93	0.55	0	1.92	24.59	100	01_Alage
43	Ulva mutabilis	0.19	18.98	40.49	0.37	0.01	0	0	0	0.24	0.6	0	0.1	0	3.29	35.74	100	01_Alage
44	Ulva prolifera	0.31	7.03	21.76	0.12	0.61	0	0	0	0.68	4.73	0.96	0.22	0.24	4.97	58.37	100	01_Alage
45	Parachlorella kessleri	0	9.64	1.62	0	0	0	0.11	0	0.89	0.34	0	2.79	0	34.84	49.77	100	01_Alage
46	Helicosporidium	0	0	0	0	0	0	0	0	0	0	0	6.01	0.49	31.12	62.38	100	01_Alage
47	Auxenochlorella pyrenoidosa	0	1.85	0.47	0	0	0	0	0	0	0.7	0	8.91	0	76.38	11.69	100	01_Alage
48	Auxenochlorella protothecoides	0	1.64	0	0	0	0	0	0	0	5.87	0.23	7.73	0	42.04	42.48	100	01_Alage
49	Micractinium conductrix	0.29	19.21	7.25	0	0.39	0	0	0	1.09	9.55	0	3.44	0	36.88	21.9	100	01_Alage
50	Chlorella sorokiniana	0	10.15	19.73	0	0.46	0	0	0	0	3.37	0	2.02	0	42.56	21.73	100	01_Alage
51	Chlorella variabilis	0	8.91	3.92	0	0	0	0	0	0.31	3.61	0	4.63	0	56.75	21.87	100	01_Alage
52	Chlorella vulgaris	0	8.57	1.08	0	0	0	0	0	0	1.47	0	4.59	0	68.39	15.89	100	01_Alage
53	Prototheca bovis	0	0	0	0	0	0	0	0	0	4.56	0	14.16	2.12	58.04	21.12	100	01_Alage
54	Prototheca ciferrii	0	0	0	0	2.73	0	0	0	0	2.48	0	11.99	0	58.51	24.29	100	01_Alage
55	Prototheca cutis	0	8.05	0.13	0	0	0	0	0	0	1.71	0	1.92	0	29.97	58.22	100	01_Alage
56	Prototheca stagnorum	0	0	0	0	0	0	0.24	0	0	0	0	11.24	0	54.3	34.22	100	01_Alage
57	Prototheca wickerhamii	0	0.26	22.17	0	0.32	0	0	0	0	0	0	3.32	0	38.61	35.32	100	01_Alage
58	Prototheca zopfii	0	0	1.44	0	0.16	0	0.11	0	0	2.51	0	13.76	0.22	56.11	25.69	100	01_Alage
59	Chloroidium	0	2.37	0	0	0	0	0	0	0	0	0	8.07	0	54.24	35.32	100	01_Alage
60	Chlorella	0	2.12	0.06	0	0	0	0	0	0	1.36	0	10.73	0	74.62	11.11	100	01_Alage
61	Picochlorum	0	6.64	0	0	0	0	0	0	0	1.73	0	6.79	0	37.8	47.05	100	01_Alage
62	Botryococcus braunii	0.51	6.59	36.86	0.2	0	0	0.06	0	0.3	19.61	0.15	1.29	1.01	17.68	15.74	100	01_Alage
63	Coccomyxa	0	13.96	4.65	0	0	0	0	0	0	0.79	0	1.51	0	22.57	56.53	100	01_Alage
64	Coccomyxa subellipsoidea C-169	0	27.39	0.99	0	0	0	0	0	0	13.13	1.34	0.68	0	12.36	44.11	100	01_Alage
65	unclassified Trebouxiophyceae	2.68	8.8	3.73	0	0	0	0.05	0	0	2.31	0	3.48	0.06	40.89	38.01	100	01_Alage
66	Trebouxia	0	17.16	11.05	0	0	0	0	0	0.93	0.38	0.06	0.86	0	15.35	54.21	100	01_Alage
67	Trebouxia gelatinosa	1.13	13.49	10.23	0	0	0	0	0	1.57	6.95	0	0.64	0	20.13	45.86	100	01_Alage
68	Chlorokybus atmophyticus	1.46	5.49	41.49	0	0.11	0	0.3	0	0	20.88	0	0.38	0.21	7.15	22.53	100	01_Alage
69	Mesostigma viride	0.73	14.61	1.42	0.31	0	0	0	0.05	0.03	1.74	0	0.7	0	8.93	71.47	100	01_Alage
70	Klebsormidium nitens	1.6	3.15	13.67	0	0	0	0	0	0	6.79	0.75	1.28	0	8.05	64.71	100	01_Alage
71	Chara braunii	0.35	8.54	25.92	0.34	0.36	0	0.31	0.09	0.65	8.73	1.72	0.6	0.75	4.04	47.6	100	01_Alage
72	Mesotaenium endlicherianum	1.1	1.12	49.2	0.03	0	0	0	0.08	0.02	8.81	0	1.52	0.04	7.81	30.27	100	01_Alage
73	Physcomitrella patens	0	3.22	85.04	0	0	0	0	0	0.83	1.07	0.09	0.45	0.02	2.48	6.8	100	02_Bryophyte
74	Pleurozium schreberi	0.08	1.13	3.73	0.06	0.03	0	0	0.08	0.25	8.57	0.08	0.21	0.16	1.05	84.55	100	02_Bryophyte
75	Marchantia inflexa	0	1.6	32.73	0.09	0.06	0	0	0.11	1.85	7.17	0	0.31	0.03	1.31	54.76	100	02_Bryophyte
76	Marchantia polymorpha	0.08	6.03	34.29	0.07	0.11	0	0.18	0	1.38	7.85	0.08	0.71	0	3.5	45.72	100	02_Bryophyte
77	Selaginella kraussiana	0.03	13.57	17.27	0.36	0.64	0	0	0.09	1.25	7.47	0.29	0.58	0	2.93	55.51	100	03_Lycophytes
78	Selaginella moellendorffii	0	1.79	56.92	0.21	0.59	0	0.06	0.09	2.42	13.69	0.81	0.23	0.11	1.49	21.57	100	03_Lycophytes
79	Selaginella tamariscina	0.04	3.38	39.16	0.53	0.83	0	0.04	0.16	0.25	21.83	0.23	0.33	0.01	3.41	29.82	100	03_Lycophytes
80	Adiantum capillus-veneris	0	6.24	52.87	0.61	0.03	0	0	0.02	0.38	7.14	0	0.09	0.04	1.42	31.16	100	04_Fern
81	Azolla filliculoides	0	9.02	59.9	0.15	1.42	0	0	0.04	0.39	5.61	0.81	0.15	0.23	1.78	20.48	100	04_Fern
82	Salvinia cucullata	0	7.31	39.89	0	2.61	0	0	0.03	0.51	4.83	3.47	0.2	0.75	1.58	38.82	100	04_Fern
83	Gnetum montanum	0	3.59	63.02	0.05	0.13	0	0	0.13	0.17	1.22	0.07	0.08	0.46	0.25	30.82	100	05_Gymnosperms
84	Sequoiadendron giganteum	0	4.99	57.4	0.25	0.01	0.03	0.26	0.01	0.22	8.88	0.05	0.17	0.34	0.71	26.67	100	05_Gymnosperms
85	Amborella trichopoda	0	7.92	54.09	0	0.11	0	0	0.03	0.16	29.15	0.06	0.47	0	2.42	5.58	100	06_ANA
86	Nymphaea colorata	0.25	4.27	40.3	0.74	0.02	0	0.07	0.03	1.85	22.12	1.84	0.6	0.03	3.31	24.56	100	06_ANA
87	Cinnamomum micranthum	0.03	5.96	33.96	0	0.41	0	0.04	0.01	0.88	10.74	0.06	0.53	0.22	2.49	44.68	100	07_Magnoliids
88	Persea americana	0	5.57	37.6	0.07	0.12	0	0.09	0.07	0.48	10.12	0	0.44	0.47	1.82	43.15	100	07_Magnoliids
89	Liriodendron chinense	0.01	2.61	52.22	0	0.01	0	0	0.16	0.12	10.98	0.07	0.14	0	1.01	32.67	100	07_Magnoliids
90	Magnolia ashei	0.03	7.16	21.84	0	0.03	0.17	0	0.03	0.19	16.83	0.02	0.25	0.11	1.16	52.18	100	07_Magnoliids
91	Spirodela polyrhiza	0.04	1.9	43.57	0.22	0	0	0	0	0.47	6.46	0	1.68	0.73	9.24	35.7	100	08_Monocots
92	Zostera marina	0	7.74	39.79	0.05	0.04	0	0	0	0.18	11.11	0.04	0.29	0.15	1.18	39.44	100	08_Monocots
93	Dioscorea alata	0.03	3.44	50.49	0.01	0.01	0	0.02	0	0.55	9.62	0.18	0.59	0.13	6.08	28.85	100	08_Monocots
94	Dioscorea rotundata	0.07	4.83	50.55	0.11	0.06	0	0.07	0	0.49	14.12	0.02	0.63	0.05	3.23	25.79	100	08_Monocots
95	Trichopus zeylanicus	0.15	0.77	32.09	0	0.57	0	0	0.53	0.81	28.89	0.31	0.29	0.08	7.35	28.15	100	08_Monocots
96	Xerophyta viscosa	0	3.5	21.29	0.01	0.38	0	0.06	0.31	0.77	21.36	0.06	0.62	0.54	4.45	46.65	100	08_Monocots
97	Asparagus officinalis	0	2.03	61.63	0.01	0	0	0.09	0.02	0.85	5.76	0	0.14	0	1	28.46	100	08_Monocots
98	Apostasia shenzhenica	0.04	8.33	22.1	0	0.06	0	0	0.09	0.17	13.01	0.17	0.68	0.32	2.69	52.33	100	08_Monocots
99	Gastrodia elata	0	5.32	48	0	0.01	0	0	0	0.64	9.45	0.04	0.14	0.02	0.85	35.54	100	08_Monocots
100	Dendrobium catenatum	0	8.67	35.95	0.02	0.23	0	0	0.01	0.17	6.56	0	0.31	0.25	1.29	46.54	100	08_Monocots
101	Phalaenopsis aphrodite	0.09	5.78	50.98	0	0	0	0	0	0.12	6.09	0	0.26	2.1	1.18	33.4	100	08_Monocots
102	Phalaenopsis equestris	0.06	5.71	50.42	0	0	0	0	0	0.05	6.81	0	0.28	0.46	1.19	35.01	100	08_Monocots
103	Vanilla planifolia	0	8.67	35.18	0.06	0.04	0	0	0	0.03	2.71	0.28	1.44	0	3.31	48.29	100	08_Monocots
104	Cocos nucifera	0	0.82	64.53	0	0.03	0	0.03	0.05	0.08	8.05	0	0.18	0.55	0.9	24.79	100	08_Monocots
105	Elaeis guineensis	0.1	1.68	57.56	0	0.05	0	0.06	0	0.18	9.26	0	0.28	0.6	1.11	29.13	100	08_Monocots
106	Elaeis oleifera	0	2.03	64.62	0	0.09	0	0.04	0.07	0.27	8.56	0	0.27	0.96	1.03	22.04	100	08_Monocots
107	Calamus simplicifolius	0.04	6.15	58.06	0.17	0.03	0	0.03	0	0.56	11.46	0.09	0.2	0.52	0.97	21.71	100	08_Monocots
108	Ananas comosus	0.54	1.53	29.82	0.01	0	0	0	0.09	0.36	17.34	0.06	0.65	0.1	2.96	46.54	100	08_Monocots
109	Raddia distichophylla	0	4.87	39.31	0.01	0.21	0.79	0	0.05	1.74	19.85	0.03	0.29	0.15	1.8	30.9	100	08_Monocots
110	Leersia perrieri	0	6.37	37.53	0	0.81	1.47	0	0	4.02	37.53	0.01	0.48	0.08	3.27	8.42	100	08_Monocots
111	Oryza barthii	0	3.88	31.7	0	0.84	0.96	0	0	11.74	42.63	0.01	0.41	0.15	2.79	4.89	100	08_Monocots
112	Oryza brachyantha	0	1.36	24.93	0	0.44	0.29	0	0	11.34	51.61	0	0.47	0.04	3.29	6.24	100	08_Monocots
113	Oryza glaberrima	0	3.47	35.93	0	0.55	0.94	0	0	10.09	39.59	0.24	0.4	0.08	2.96	5.76	100	08_Monocots
114	Oryza glumipatula	0	3.78	31.94	0	0.53	1.01	0.02	0	12.07	42.75	0	0.47	0.09	3.49	3.83	100	08_Monocots
115	Oryza longistaminata	0	3.82	37.07	0	1.02	0.72	0	0	10.66	39.42	0.05	0.44	0.08	3.3	3.41	100	08_Monocots
116	Oryza meridionalis	0	4.34	28.14	0	0.82	1.25	0.02	0	10.97	45.04	0	0.5	0.06	3.72	5.13	100	08_Monocots
117	Oryza meyeriana var. granulata	0	0.7	75.78	0	0.05	0.04	0	0	1.76	13.74	0.1	0.13	0.03	0.71	6.95	100	08_Monocots
118	Oryza punctata	0	1.97	55.62	0	0.4	0.73	0	0	5.09	30.43	0	0.27	0.02	1.78	3.7	100	08_Monocots
119	Oryza rufipogon	0	3.34	36.22	0	0.45	0.89	0	0	9.9	41.24	0	0.41	0.7	3.22	3.63	100	08_Monocots
120	Oryza sativa	0	2.54	40.22	0	0.4	0.84	0	0	7.75	36.36	0.06	0.32	0.69	3.02	7.79	100	08_Monocots
121	Oryza sativa f. spontanea	0.08	4.08	31.77	0	0.65	0.81	0	0	11.83	43.71	0.01	0.45	0.09	3.48	3.06	100	08_Monocots
122	Zizania latifolia	0	2.19	55.12	0	0.07	0.1	0	0	0.86	22.46	0	0.3	0.05	1.83	17.02	100	08_Monocots
123	Brachypodium distachyon	0.12	6.85	47.11	0.07	0.3	0.76	0.02	0	1.41	20.94	0.35	0.3	0.15	1.88	19.74	100	08_Monocots
124	Dactylis glomerata	0	5.77	52.56	0	0.08	1.05	0	0	0.36	12.29	0	0.12	0.06	0.71	26.99	100	08_Monocots
125	Lolium perenne	0	19.66	24.47	0	0.39	3.14	0	0	0.65	12.62	0	0.4	0.09	1.94	36.64	100	08_Monocots
126	Hordeum pubiflorum	0	4.13	60.98	0	0.18	0.7	0	0.01	0.64	11	0	0.12	0.01	0.8	21.45	100	08_Monocots
127	Hordeum vulgare	0	1.31	84.98	0	0.03	0.11	0	0	0.12	7.43	0.02	0.08	0.68	0.36	4.88	100	08_Monocots
128	Aegilops tauschii	0	2	67.88	0	0.01	0.09	0	0.07	1.51	19.35	0.23	0.07	0.14	0.37	8.27	100	08_Monocots
129	Triticum aestivum	0.02	1.71	72.04	0	0	0.1	0	0.03	0.85	15.06	0.01	0.06	0.22	0.3	9.6	100	08_Monocots
130	Triticum dicoccoides	0	1.68	73.02	0	0.09	0.16	0	0	0.71	14.07	0	0.05	0.27	0.31	9.64	100	08_Monocots
131	Triticum urartu	0	1.48	74.07	0.04	0.01	0.13	0	0.06	0.55	11.51	0	0.06	0.09	0.3	11.69	100	08_Monocots
132	Eleusine coracana	0	2.86	71.48	0	0.19	0.08	0	0	0.44	10.28	0.04	0.15	0.04	1.2	13.23	100	08_Monocots
133	Eleusine indica	0.05	4.02	63.25	0	0.28	0.13	0	0	0.59	12.63	0	0.18	0.09	1.1	17.68	100	08_Monocots
134	Oropetium thomaeum	0.01	3.56	51.87	0	0.38	0	0	0	2.6	14.25	0.21	0.24	0	2.06	24.81	100	08_Monocots
135	Eragrostis curvula	0	5.62	52.18	0.24	0.78	0.27	0	0	1.62	21.46	0.01	0.24	0	1.98	15.62	100	08_Monocots
136	Eragrostis tef	0	10.04	26.66	0	2.15	0.95	0	0	1.76	27.23	0.02	0.6	0	4.84	25.75	100	08_Monocots
137	Sporobolus alterniflorus	0	7.67	59	0	0.4	0.3	0	0	1.19	12.23	0	0.13	0.31	0.79	18	100	08_Monocots
138	Zoysia japonica	0	3.05	48.47	0	0.47	0.03	0	0	1.48	21.52	0	0.23	1.51	1.94	21.3	100	08_Monocots
139	Zoysia matrella	0	3.1	56.09	0	0.43	0.15	0	0.03	2.63	21.38	0	0.21	1.57	1.57	12.84	100	08_Monocots
140	Zoysia pacifica	0	3.44	51.74	0	0.45	0.06	0.03	0	1.08	20.19	0	0.21	1.81	1.57	19.43	100	08_Monocots
141	Coix aquatica	0	0.56	83.8	0	0.04	0.01	0	0	0.29	7.99	0.05	0.07	0	0.48	6.71	100	08_Monocots
142	Miscanthus sacchariflorus	0	2.36	64.22	0	0.25	0.21	0	0	1.21	14.62	0	0.12	0.35	0.78	15.88	100	08_Monocots
143	Saccharum hybrid cultivar	0.55	3.85	62.47	0	0.37	0.14	0	0	1.02	18.84	0.07	0.18	0.3	1.29	10.92	100	08_Monocots
144	Saccharum spontaneum	0	3.33	66.52	0	0.29	0.26	0	0.05	1.22	15.5	0	0.15	2.1	1.06	9.53	100	08_Monocots
145	Sorghum bicolor	0.01	1.55	70.9	0	0.09	0.02	0	0	0.78	13.76	0.12	0.11	3.64	1.02	8.01	100	08_Monocots
146	Zea mays	0	0.85	84.15	0	0.08	0.01	0	0	0.68	5.62	0	0.05	0.06	0.36	8.14	100	08_Monocots
147	Alloteropsis semialata	0	3.13	64.68	0	0.28	0.13	0	0.01	1.49	17.44	0.06	0.14	0.32	0.96	11.34	100	08_Monocots
148	Echinochloa crus-galli	0	4.89	54.08	0	0.51	0.81	0	0.02	1.29	20.74	0.09	0.26	1.4	2.31	13.59	100	08_Monocots
149	Cenchrus americanus	0	1.99	79.82	0	0.17	0.08	0	0	0.29	7.07	0	0.06	0.01	0.43	10.07	100	08_Monocots
150	Setaria italica	0	3.16	54.3	0	0.27	0.56	0	0	1.55	21.53	0	0.23	0.22	1.64	16.54	100	08_Monocots
151	Setaria viridis	0	3.05	58.66	0.07	0.1	0.51	0	0	1.51	21.4	0	0.24	0.73	1.64	12.07	100	08_Monocots
152	Dichanthelium oligosanthes	0	1.23	60.29	0	0.12	0.02	0.01	0	0.61	14.1	0	0.15	0.01	1.33	22.14	100	08_Monocots
153	Urochloa ruziziensis	0	3.47	63.87	0	0.43	0.62	0	0	0.93	18.25	0	0.19	0.07	1.1	11.07	100	08_Monocots
154	Panicum miliaceum	0	1.95	66.67	0	0.21	0.19	0	0	0.63	9.26	0.01	0.18	4	1.28	15.61	100	08_Monocots
155	Panicum hallii	0	0.8	76.62	0	0.12	0.17	0	0	0.21	7.96	0.07	0.12	1.35	0.9	11.67	100	08_Monocots
156	Eichhornia paniculata	0.04	4.48	36.62	0	0.02	0	0	0.01	0.25	7.05	0.04	0.4	0.04	2.58	48.46	100	08_Monocots
157	Musa acuminata	0	2.27	64.9	0	0.13	0	0	0.1	0.05	4.68	0	0.36	0.05	2.06	25.38	100	08_Monocots
158	Musa balbisiana	0	1.81	67.63	0.32	0.36	0	0.03	0	0.42	6.04	2.22	0.29	0.03	4.42	16.43	100	08_Monocots
159	Musa itinerans	0	2.38	65.14	0.01	0.19	0	0	0	0.17	5.21	0.08	0.46	0.06	2.49	23.79	100	08_Monocots
160	Musa schizocarpa	0.09	2.82	74.13	0.01	0.12	0	0	0	0.02	4.95	1.64	0.23	0.48	1.76	13.76	100	08_Monocots
161	Berberis thunbergii	0.01	6.83	43.07	0	0.51	0	0.08	0	0.9	13.72	0.12	0.3	0	1.23	33.23	100	09_Base_eudicots
162	Eschscholzia californica	0.21	7.37	34.62	0.11	0.88	0	0.02	0.27	0.97	8.89	0.04	0.47	0.25	1.8	44.11	100	09_Base_eudicots
163	Macleaya cordata	0	3.97	34.17	0	0.15	0	0.16	0.12	0.87	12.38	0	0.62	0.32	2.31	44.94	100	09_Base_eudicots
164	Papaver somniferum	0	6.11	53.9	0	0.06	0	0.03	0.07	0.24	7.09	0	0.12	0.12	1.6	30.66	100	09_Base_eudicots
165	Aquilegia coerulea	0	6.65	38.59	0	0.5	0	0.02	0.02	1.48	10.09	0.17	0.4	0.15	2	39.93	100	09_Base_eudicots
166	Nelumbo nucifera	0	11.94	41.95	0	0.29	0	0.05	0.01	0.18	14.53	0	0.36	0.04	1.52	29.12	100	09_Base_eudicots
167	Macadamia integrifolia	0	9.83	48.46	0.03	0.61	0	0.02	0.22	0.31	6.96	0.45	0.73	0.14	2.08	30.18	100	09_Base_eudicots
168	Kalanchoe fedtschenkoi	0	4.37	20.74	0	0.02	0	0	0	0.81	19.31	0.12	0.41	0.43	1.51	52.28	100	10_Super_rosids
169	Sedum album	0.03	3.65	39.22	0.15	0.2	0	0.06	0.03	0.74	10.93	0.38	0.26	0.21	1.17	42.97	100	10_Super_rosids
170	Cissus quadrangularis	0	7.95	40.5	0	0.03	0	0	0	0.61	4.71	0.01	1.19	0.14	3.69	41.17	100	10_Super_rosids
171	Vitis aestivalis	0	7.2	17.89	0	0	0	0	0	0.48	1.9	0.04	0.96	0	3.04	68.49	100	10_Super_rosids
172	Vitis cinerea x Vitis riparia	0	11.35	46.76	0	0.17	0	0	0	0.92	18.28	0.03	1.09	0.04	3.47	17.89	100	10_Super_rosids
173	Vitis riparia	0.01	9.22	55.08	0.01	0.03	0	0	0.03	0.78	17.26	0	0.73	0	2.63	14.21	100	10_Super_rosids
174	Vitis vinifera	0.03	8.98	51.07	0	0.04	0	0	0	0.69	17.06	0.02	0.72	1.05	3.02	17.33	100	10_Super_rosids
175	Vitis x labruscana x Vitis vinifera	0.03	9.64	57.97	0	0.02	0	0	0	0.91	15.22	0.09	0.67	0.44	2.43	12.57	100	10_Super_rosids
176	Aristotelia chilensis	0	9.67	11.03	0	0	0.18	0	0	0.5	7.95	0	4.21	0	15.54	50.91	100	11_Fabids
177	Cephalotus follicularis	0	2.14	58.55	0.28	0.02	0	0.18	1.15	0.01	5.01	0	0.08	0.06	0.41	32.12	100	11_Fabids
178	Populus simonii	0	2.43	41.55	0	1.3	0	0	0	16.11	14.59	0.41	0.63	0.39	2.56	20.03	100	11_Fabids
179	Salix brachista	0.01	1.25	42.51	0	5.25	0	0.05	0	13.5	12.55	0.09	0.63	0	3.3	20.86	100	11_Fabids
180	Caryocar brasiliense	0	3.71	50.23	0.07	0	0	0.18	0	0.07	5.09	0.02	1.21	0.04	3.74	35.63	100	11_Fabids
181	Ricinus communis	0.13	0.39	49.69	0.03	0.14	0	0	0	0.28	6.46	0.73	0.59	17.58	2.23	21.77	100	11_Fabids
182	Jatropha curcas	0	4.9	47.58	0.01	0.06	0	0	0	1.04	12.75	0.05	0.85	0	3.42	29.36	100	11_Fabids
183	Manihot esculenta	0.6	1.71	61.4	0.01	0.01	0	0	0	0.09	6.5	0	0.54	0	1.71	27.44	100	11_Fabids
184	Hevea brasiliensis	0.03	0.89	81.74	0	0.01	0	0	0	0.02	1.59	0.01	0.22	0	1.06	14.43	100	11_Fabids
185	Linum usitatissimum	0	9.71	41.19	0.03	0.05	0	0.07	0.01	0.68	14.64	0.06	0.52	0.19	2.19	30.66	100	11_Fabids
186	Passiflora edulis	0	10.48	26.15	0	0.14	0	0	0	0.28	3.72	0.02	0.66	0	2.34	56.21	100	11_Fabids
187	Rhizophora apiculata	0.43	2.62	48.73	0	0.72	0	0	0	1.03	3.69	0.39	1.46	1.59	9.95	29.39	100	11_Fabids
188	Populus alba	0	2.61	46.92	0.05	1.29	0	0.02	0	13.85	13.14	0.16	0.74	0.06	3.15	18.01	100	11_Fabids
189	Populus euphratica	0.06	1.2	59.49	0	0.93	0	0	0.1	10.09	10.77	0.37	0.66	0.04	2.7	13.61	100	11_Fabids
190	Populus trichocarpa	0	2.13	40.78	0	1.31	0	0.04	0	18.02	15.18	0.06	0.63	1.49	2.46	17.9	100	11_Fabids
191	Glycine tomentella	0	2.91	57.74	0	0.42	0	0.88	0.01	0.28	12.73	0	0.68	0	2.6	21.74	100	11_Fabids
192	Carpinus fangiana	0	9.27	34.3	0.02	0.25	0	0	0.05	0.7	11.09	0.03	0.77	0.1	3.19	40.23	100	11_Fabids
193	Chamaecrista fasciculata	0	4.96	38.52	0.04	0.47	0	0	0	1.04	12.56	0.04	0.53	0.01	2.59	39.26	100	11_Fabids
194	Vachellia collinsii	0	5.1	26.54	0	0.18	0	0.04	0.07	1.51	22.74	0.01	0.53	0.31	2.34	40.65	100	11_Fabids
195	Mimosa pudica	0	4.05	22.77	0	1.1	0	0	0	1.03	8.6	0.01	0.52	0.14	2.17	59.6	100	11_Fabids
196	Prosopis alba	0.01	2.14	39.79	0	0.08	0	0	0	1.02	11.05	0.13	0.44	0.02	1.81	43.52	100	11_Fabids
197	Cercis canadensis	0.04	3.36	42.99	0.08	0.09	0	0	0	1.95	9.94	0.09	0.71	0.28	2.62	37.84	100	11_Fabids
198	Nissolia schottii	0	4.03	28.97	0	0.13	0	0.32	0.1	0.47	11.33	0.07	0.49	1.07	2.27	50.74	100	11_Fabids
199	Arachis duranensis	0	1.98	74.51	0	0.29	0	0	0.01	0.38	6.36	0	0.61	0.07	1.41	14.37	100	11_Fabids
200	Arachis hypogaea	0	1.7	78.04	0.05	0.23	0	0.01	0.02	0.41	5.37	0.01	0.47	0	1.49	12.2	100	11_Fabids
201	Arachis ipaensis	0	1.81	76.65	0	0.2	0	0	0	0.25	5.44	0	0.45	0	1.12	14.09	100	11_Fabids
202	Arachis monticola	0	2.11	78.04	0.02	0.18	0	0	0.25	0.33	5.69	0.02	0.48	0	1.63	11.24	100	11_Fabids
203	Lupinus angustifolius	0	4.02	46.23	0	0.44	0	0	0	0.5	9.91	0.11	0.29	0.08	3.66	34.77	100	11_Fabids
204	Cicer arietinum	0	1.88	46.05	0	0.02	0	0.05	0.03	0.22	13.7	0.07	0.53	4.64	2.36	30.45	100	11_Fabids
205	Cicer echinospermum	0	2.47	54.54	0.01	0.03	0	0.05	0.1	0.6	15.8	0.03	0.44	4.48	2.09	19.36	100	11_Fabids
206	Cicer reticulatum	0	6.42	40.58	0	0.06	0	0	0	0.24	15.25	0.01	0.63	2.12	2.65	32.03	100	11_Fabids
207	Vicia faba	0.29	5.97	20.67	0.04	0.32	0	0.19	0.17	2.03	13.65	0.04	0.99	0.04	3.66	51.93	100	11_Fabids
208	Medicago truncatula	0.22	10.31	34.25	0	1.11	0	0	0.08	3.16	23.51	0.11	0.66	0.15	2.61	23.85	100	11_Fabids
209	Trifolium subterraneum	0.02	6.35	37.63	0.03	0.71	0	0	0.02	2.89	14.5	0.01	0.53	0.06	2.37	34.87	100	11_Fabids
210	Lotus japonicus	0	8.29	35.77	0	0.51	0	0	0	1.69	13.99	0	0.66	0.28	2.51	36.29	100	11_Fabids
211	Abrus precatorius	0	4.67	39.48	0	0.17	0	0	0.07	0.71	10.6	2.76	1.07	0.11	3.53	36.83	100	11_Fabids
212	Cajanus cajan	0.23	1.64	35.75	0.68	0.05	0	0.17	0	0.69	9.26	0	0.57	0.48	2.37	48.11	100	11_Fabids
213	Glycine max	0	2.67	65.39	0	0.31	0	0.02	0	0.45	11.01	0.09	0.58	2.5	2.34	14.62	100	11_Fabids
214	Glycine soja	0.03	2.09	65.7	0	0.17	0.01	0.27	0	0.47	10.71	0.01	0.57	1.43	2.27	16.28	100	11_Fabids
215	Mucuna pruriens	0	1.54	35.12	0.09	0.18	0	0.11	0	0.13	6.43	0	1.02	0.1	3.39	51.89	100	11_Fabids
216	Phaseolus vulgaris	0.15	5.01	51.3	0	0.01	0	0	0	0.81	6.2	0	0.6	0.06	2.34	33.52	100	11_Fabids
217	Spatholobus suberectus	0	2.75	33.66	0.14	0.26	0	0.02	0	0.95	19.78	0.09	0.57	0	2.27	39.52	100	11_Fabids
218	Vigna angularis	0	1.37	36.58	0.03	0.05	0	0	0.05	0.28	8.96	0.07	0.84	0.06	5.22	46.49	100	11_Fabids
219	Vigna radiata	0	0.44	47.65	0	0.02	0	0	0	0.33	8.98	0.05	0.88	0.04	3.4	38.21	100	11_Fabids
220	Vigna unguiculata	0	0.74	45.55	0	0.03	0	0	0.15	1.67	16.18	0.4	0.72	0.09	4.03	30.43	100	11_Fabids
221	Quillaja saponaria	0.03	5.79	17.09	0	0.1	0	0	0.04	0.66	3.42	0.04	1.14	0.34	4.07	67.29	100	11_Fabids
222	Cannabis sativa	0.01	5.14	72.02	0	0.01	0	0.04	0.05	0.07	4.47	0	0.27	0.01	1.28	16.63	100	11_Fabids
223	Humulus lupulus	0	2.56	59.15	0.02	0.05	0	0	0.07	0.16	5.85	0	0.19	0	0.88	31.08	100	11_Fabids
224	Parasponia andersonii	0	1.17	50.41	0	0.01	0	0	0.07	0.57	10.08	0	0.48	0.1	2.14	34.97	100	11_Fabids
225	Trema orientale	0	1.83	40.07	0	0.02	0.02	0	0.28	0.94	14.08	0	0.8	0.03	3.22	38.71	100	11_Fabids
226	Artocarpus camansi	0	1.68	53.06	0.14	0.04	0	0	0	0.14	8.02	0.03	0.76	0.08	2.79	33.26	100	11_Fabids
227	Ficus carica	0	0.82	17.8	0.04	0.07	0	0	0.1	1.29	11.23	0.02	2.18	0.07	9.84	56.54	100	11_Fabids
228	Ficus erecta	0.04	1.82	35.62	0	0.39	0	0.14	0	2.35	23.59	0.42	1.36	0.06	6.01	28.2	100	11_Fabids
229	Morus notabilis	0	1.47	43.13	0.07	0.06	0	0.13	0.02	1.91	13.43	0.03	1.04	0	4.48	34.23	100	11_Fabids
230	Ochetophila trinervis	0	4.77	35.52	0.12	0	0	0	0.04	0.8	19.55	0.01	0.85	0.03	3.15	35.15	100	11_Fabids
231	Ziziphus jujuba	0	2.93	49.88	0.31	0.22	0.03	0.06	0.15	1.66	10.8	0.39	1.22	0.06	5.49	26.8	100	11_Fabids
232	Prunus avium	0.04	3.32	34.32	0.08	0.72	0.04	0	0.02	1.7	18.73	0.04	0.76	0	3.24	37.01	100	11_Fabids
233	Prunus dulcis	0	1.69	45.88	0	0.65	0.05	0	0	1.06	26.46	0.06	0.73	0.06	3.27	20.1	100	11_Fabids
234	Prunus mume	0	2.18	32.55	0	0.73	0	0.06	0.05	1.4	22.14	0.04	0.87	0.02	6.52	33.44	100	11_Fabids
235	Prunus persica	0	2.96	39.45	0	0.37	0	0.03	0	1.03	28.26	0.45	0.73	0.45	3.12	23.15	100	11_Fabids
236	Prunus yedoensis	0	3.12	34.79	0.03	0.76	0.01	0.03	0.08	1.84	25.8	0.74	0.65	0.34	2.68	29.13	100	11_Fabids
237	Malus baccata	0	5.77	59.13	0	1.02	0.11	0	0	0.96	17.3	0.03	0.41	0.02	1.67	13.56	100	11_Fabids
238	Malus domestica	0	6.8	56.48	0	1.17	0.12	0.01	0.01	1.18	19.45	0.02	0.43	0.04	1.66	12.64	100	11_Fabids
239	Pyrus betulifolia	0	2.55	60.25	0.09	1.36	0.17	0	0	1.28	20.15	0.07	0.5	0	2.18	11.41	100	11_Fabids
240	Pyrus x bretschneideri	0.04	2.05	60.56	0	1.25	0.15	0	0	1.15	19.43	0.22	0.47	0.01	2.22	12.44	100	11_Fabids
241	Pyrus ussuriensis x Pyrus communis	0	2.32	65.93	0	1.49	0.14	0	0	1.15	18.16	0.02	0.42	0.01	1.8	8.56	100	11_Fabids
242	Dryas drummondii	0	2.27	29.45	0	0.29	0	0.33	0.07	0.69	25.43	0.11	0.87	0.98	4.02	35.51	100	11_Fabids
243	Purshia tridentata	0	5.83	31.16	0	0.09	0	0.04	0.06	1.76	20.3	0.11	1.1	0.21	4.45	34.89	100	11_Fabids
244	Geum urbanum	0	3.28	52.95	0.04	0.02	0	0	0	0.94	19.62	0.1	0.17	0.49	0.92	21.48	100	11_Fabids
245	Fragaria nubicola	1.55	5.83	31.53	0	0.74	0.02	0	0	2.13	28.18	0.02	0.8	0.54	3.52	25.13	100	11_Fabids
246	Fragaria orientalis	2.22	5.59	29.45	0	0.7	0.05	0	0.24	1.86	26.49	0.02	0.7	0.61	2.96	29.11	100	11_Fabids
247	Fragaria vesca	0.05	5.29	35.48	0.13	0.7	0.05	0.81	0	1.44	30.2	0.07	0.82	0.44	3.62	20.91	100	11_Fabids
248	Fragaria x ananassa	1.05	3.84	48.91	0	0.63	0	0.09	0	0.43	22.89	0.01	0.41	0.08	1.82	19.83	100	11_Fabids
249	Rosa chinensis	0.03	5.42	52.45	0	0.26	0	0	0.02	0.86	13.65	0.05	0.41	0.33	1.85	24.69	100	11_Fabids
250	Rosa lucieae	0.01	4.86	52.07	0.04	0.18	0	0	0.01	1.15	15.64	0.16	0.37	0.47	1.67	23.37	100	11_Fabids
251	Rosa x damascena	0.01	6.74	52.1	0.08	0.33	0	0	0	1.03	15.06	0.01	0.41	0.48	1.71	22.05	100	11_Fabids
252	Boehmeria nivea	0	1.68	28.49	0	0.04	0.01	0	0	0.68	7.58	0.06	0.86	0.03	15.26	45.32	100	11_Fabids
253	Begonia fuchsioides	0	8.77	42.69	0	0.01	0	0	0	0.27	9.3	0.46	0.42	0.34	4.72	33.02	100	11_Fabids
254	Benincasa hispida	0	1.97	72.32	0	0.14	0	0	0.14	0	7.62	0.02	0.26	0.17	0.93	16.44	100	11_Fabids
255	Citrullus lanatus	0	2.55	29.94	0	0.35	0	0.23	0	0.05	6.77	0.02	0.81	0.33	2.92	56.01	100	11_Fabids
256	Cucumis melo	0.16	2.09	36.84	0	0.17	0	0	0.03	0.33	19.25	0.11	0.72	0.33	2.75	37.21	100	11_Fabids
257	Cucumis sativus	0	7.16	31.83	0.18	0.3	0	0	0.03	0.38	11.08	0.24	1.31	0.69	4.57	42.24	100	11_Fabids
258	Lagenaria siceraria	0	3.68	28.75	0	0.58	0	0	0	0.11	10.46	0.07	0.76	0.28	3.24	52.06	100	11_Fabids
259	Cucurbita argyrosperma	0	1.95	46.33	0	1.94	0.03	0	0	0.45	5.85	0.81	1.36	0.07	5.57	35.65	100	11_Fabids
260	Cucurbita moschata	0	1.7	49.32	0	4.14	0	0	0.22	1.2	3.61	0.32	0.84	0.89	6.03	31.74	100	11_Fabids
261	Momordica charantia	0.21	4.4	25.2	0	0.2	0	0	0	0.17	3.06	0.1	0.72	0.28	2.37	63.3	100	11_Fabids
262	Datisca glomerata	0	4.93	49.99	0	0.09	0	0.03	0.03	0.82	11.86	0.23	0.67	1.35	1.87	28.15	100	11_Fabids
263	Alnus glutinosa	0.03	7.91	27.78	0	0.19	0	0	0.18	0.55	9.2	0.02	0.67	0.17	2.86	50.45	100	11_Fabids
264	Betula nana	0	8.96	21.01	0	0.1	0.04	0.01	0	0.79	12.07	0.05	0.98	0.01	3.86	52.12	100	11_Fabids
265	Betula pendula	0.26	10.34	25.73	0.02	0.03	0.02	0	0.03	0.69	9.62	0.07	0.74	0.08	2.83	49.54	100	11_Fabids
266	Casuarina equisetifolia	0	7.24	49.84	0.16	0.06	0	0	0.39	3.11	2.51	0.46	0.62	0.05	2.34	33.22	100	11_Fabids
267	Casuarina glauca	0.01	6.17	30.62	0	0.03	0	0	0.03	2.53	0.16	0.27	0.69	0	2.45	57.04	100	11_Fabids
268	Castanea mollissima	0	5.97	41.35	0	0.16	0	0	0.08	0.95	9.95	0.05	0.62	0.06	3.09	37.72	100	11_Fabids
269	Fagus sylvatica	0.05	8.88	27.82	0.04	0.75	0	0	0.02	1.22	9.53	0.41	0.98	0.14	4.48	45.69	100	11_Fabids
270	Quercus lobata	0.04	6.95	29.9	0	0.06	0	3.81	0	0.93	8.9	0.51	0.66	0.19	3.42	44.64	100	11_Fabids
271	Quercus robur	0.29	6.6	35.28	0.01	0.08	0	1.48	0.01	0.97	8.63	0.01	0.65	0.15	3.13	42.72	100	11_Fabids
272	Quercus suber	0.28	7.61	36.01	0.05	0.35	0	0.84	0	0.52	8.09	0.02	0.7	0.09	3.34	42.09	100	11_Fabids
273	Juglans cathayensis	0	12.86	24.82	0	0.2	0	0.01	0.11	0.87	10.84	0	0.46	0.07	2.32	47.42	100	11_Fabids
274	Juglans hindsii	0.05	11.09	25.17	0.03	0.25	0	0.02	0	0.78	10.51	0.04	0.49	0.08	2.71	48.77	100	11_Fabids
275	Juglans mandshurica	0	12.95	26.22	0	0.2	0	0	0.12	0.78	9.52	0	0.54	0.4	2.55	46.71	100	11_Fabids
276	Juglans microcarpa	0.01	10.7	22.81	0	0.22	0	0	0.06	0.43	9.78	0.07	0.53	0.03	2.64	52.74	100	11_Fabids
277	Juglans microcarpa x Juglans regia	0	15.08	25.06	0	0.29	0	0.06	0.16	1.34	15.14	0	0.46	0.57	2.55	39.29	100	11_Fabids
278	Juglans nigra	0.12	12.29	24.9	0.05	0.36	0	0	0.08	0.36	10.91	0.09	0.51	0.01	2.54	47.8	100	11_Fabids
279	Juglans regia	0	11.95	22.95	0.01	0.22	0	0	0.11	0.58	11.32	0.8	0.51	1.79	2.85	46.91	100	11_Fabids
280	Juglans sigillata	0	13.46	24.56	0	0.23	0	0	0	0.58	10.75	0	0.54	0.07	2.73	47.07	100	11_Fabids
281	Pterocarya stenoptera	0	13.07	23.61	0	0.31	0	0	0.1	1.06	11.2	0.61	0.56	0.17	2.6	46.71	100	11_Fabids
282	Morella rubra	0.04	4.92	28.21	0.11	0.32	0	0.1	0.08	1.5	18.96	0.16	0.56	0	2.03	43.01	100	11_Fabids
283	Punica granatum	0.04	2.22	31.55	0.03	0.52	0.02	0.05	0	1.68	8.01	0.04	0.47	0.33	3.06	51.97	100	12_Malvids
284	Eucalyptus grandis	0	4.98	44.31	0	0.26	0	0.02	0	1.64	17.63	0.01	0.38	0.18	1.99	28.61	100	12_Malvids
285	Eucalyptus melliodora	0	4.9	49.94	0	0.21	0.01	0.08	0.04	1.27	18.41	0.22	0.42	0.13	2.12	22.26	100	12_Malvids
286	Eucalyptus pauciflora	0	4.15	44.49	0	0.43	0	0.04	0.03	2.32	21.58	0.1	0.39	0.21	1.77	24.48	100	12_Malvids
287	Gossypium darwinii	0	1.53	80.07	0	0	0	0	0	0.13	4.94	0.11	0.27	0.03	0.81	12.12	100	12_Malvids
288	Gossypium mustelinum	0	1.37	80.8	0	0	0	0	0	0.07	4.26	0.05	0.25	0	0.76	12.44	100	12_Malvids
289	Gossypium tomentosum	0	1.76	81.86	0	0.01	0.01	0	0	0.04	4.03	0.19	0.28	0	0.81	11	100	12_Malvids
290	Gossypium turneri	0	2.5	74.21	0	0	0	0	0	0.28	7.63	0.02	0.35	0	1.21	13.79	100	12_Malvids
291	Metrosideros polymorpha	0.01	2.82	26.79	0	0.31	0.04	0	0.05	0.94	31.09	0.29	0.41	0.15	2.33	34.78	100	12_Malvids
292	Rhodamnia argentea	0.01	1.91	41.42	0	0.28	0	0	0.01	1.36	24.99	0.35	0.44	0.41	2.57	26.25	100	12_Malvids
293	Psidium guajava	0	4.86	42.77	0	0.21	0	0	0.11	1.01	18.03	0.11	0.28	1.25	1.3	30.07	100	12_Malvids
294	Syzygium oleosum	0.04	2.63	46.24	0.03	0.23	0	0	0	1.1	23.82	0.11	0.36	0.04	1.79	23.61	100	12_Malvids
295	Azadirachta indica	0	1.98	33.99	0.05	0.06	0	0	0	2.24	14.18	0.13	1.05	0.03	4.63	41.66	100	12_Malvids
296	Atalantia buxifolia	0	3.77	40.43	0.11	0.11	0	0.11	0.24	1.35	12.72	0.04	0.58	0.01	2.63	37.9	100	12_Malvids
297	Citrus cavaleriei	0	4.16	44.17	0	0.19	0	0	0.21	1.37	12.24	0.01	0.61	0.05	2.67	34.31	100	12_Malvids
298	Citrus clementina	0	3.55	45.21	0.01	0.09	0	0.1	0.22	1.25	12.23	0.03	0.46	0.15	7.14	29.56	100	12_Malvids
299	Citrus hindsii	0	3.54	47.42	0.13	0.19	0	0.03	0.33	1.43	12.79	0.08	0.55	0.29	2.39	30.83	100	12_Malvids
300	Citrus maxima	0	3.16	50.64	0.17	0.36	0	0.06	0.11	1.72	11.86	3.27	0.46	0.4	2.14	25.66	100	12_Malvids
301	Citrus medica	0.02	3.22	53.04	0	0.04	0	0.03	0.16	1.28	11.99	0.04	0.52	0	3.53	26.13	100	12_Malvids
302	Citrus reticulata	0.18	3	31.05	0	0	0	0	0	1.59	4.15	0.03	0.52	0.18	3.37	55.93	100	12_Malvids
303	Citrus sinensis	0.05	3.54	42.68	0.1	0.07	0	0.01	0.09	1.47	11.93	0.04	0.5	0.22	2.55	36.75	100	12_Malvids
304	Citrus unshiu	0	3.3	45.4	0	0.08	0.02	0	0.22	1.31	10.57	0.01	0.59	0.32	2.52	35.65	100	12_Malvids
305	Citrus x paradisi x Citrus trifoliata	0.07	5.79	41.35	0.03	0.09	0	0	0.03	1.39	11.64	0.01	0.72	0.01	2.73	36.14	100	12_Malvids
306	Acer yangbiense	0.03	3.85	57.02	0	0.17	0	0	0.07	0.6	10.78	0	0.43	0	2.33	24.74	100	12_Malvids
307	Xanthoceras sorbifolium	0	6.66	43.46	0.03	0.08	0	0	0.24	0.32	10.58	0.1	0.43	0.07	2.08	35.97	100	12_Malvids
308	Herrania umbratica	0	2.29	48.65	0.07	0	0	0	0	0.65	10.58	0	0.74	0	2.33	34.69	100	12_Malvids
309	Corchorus capsularis	0	5.53	44.54	0	0.03	0	0.07	0	1.02	10.74	0.16	0.52	0.4	2.02	34.98	100	12_Malvids
310	Corchorus olitorius	0	4.52	49.24	0	0.03	0	0	0.03	0.73	8.26	0.11	0.53	0.2	2.59	33.76	100	12_Malvids
311	Durio zibethinus	0	3.96	52.86	0	0.01	0	0	0.19	2.44	7.91	0.95	0.67	0.4	2.09	28.53	100	12_Malvids
312	Gossypioides kirkii	0.13	4.16	62.34	0	0.01	0	0	0.03	0.52	8.24	0.63	0.46	0.04	1.42	22.03	100	12_Malvids
313	Gossypium arboreum	0	1.05	82.37	0	0.01	0	0	0	0	2.27	0.04	0.21	0	0.71	13.34	100	12_Malvids
314	Gossypium barbadense	0	1.64	76.31	0	0	0	0	0.06	0.04	4.66	0.14	0.32	0	1.28	15.55	100	12_Malvids
315	Gossypium hirsutum	0	1.4	78.52	0	0.03	0	0.04	0.05	0.08	3.63	0.04	0.26	0	0.86	15.08	100	12_Malvids
316	Gossypium raimondii	0	2.4	68.92	0	0.16	0	0.02	0.05	0.21	8.19	0.15	0.38	0.03	1.26	18.24	100	12_Malvids
317	Gossypium thurberi	0	2.72	66.57	0	0.11	0	0	0	0.03	6.04	0.04	0.43	0	1.44	22.62	100	12_Malvids
318	Hibiscus syriacus	0.05	3.37	55.39	0	0.18	0	0.04	0.05	0.12	8.78	0	0.3	0.28	1.12	30.32	100	12_Malvids
319	Kokia drynarioides	0	4.23	63.41	0.04	0.07	0	0.01	0	0.17	6.27	0.01	0.49	0	1.51	23.8	100	12_Malvids
320	Aquilaria agallochum	0	3.07	50.26	0	0.03	0.1	0	0.29	0.68	10.92	0.05	0.22	0.03	0.89	33.45	100	12_Malvids
321	Aquilaria sinensis	0.06	2.21	51.74	0.03	0.04	0.06	0.01	0	0.47	8.68	0.11	0.22	0	1.04	35.32	100	12_Malvids
322	Aethionema arabicum	0	5.39	35.95	0.28	0.14	0	0.19	0.13	1.47	18.93	0	1.44	0.1	5.35	30.63	100	12_Malvids
323	Arabis alpina	0	6.91	48	0.01	0.41	0.08	0.03	0.06	3.8	14.58	0.03	0.34	0.31	1.23	24.22	100	12_Malvids
324	Arabis nordmanniana	0	9.35	39.28	0	0.99	0.12	0.04	0.2	2.38	16.19	0	1.15	0.13	4.66	25.52	100	12_Malvids
325	Aurinia saxatilis	0.12	10.61	43.33	0	0.31	0.07	0.01	0.02	1.74	12.92	0.01	0.34	0.22	1.41	28.9	100	12_Malvids
326	Odontarrhena argentea	0	10.35	22.74	0	0.74	0.13	0.14	0.2	3.23	17.2	0.01	1.31	0.25	5.33	38.37	100	12_Malvids
327	Anastatica hierochuntica	0	9.5	56.8	0.03	0.47	0.1	0.08	0	1.26	12.91	0.04	0.3	0.1	1.01	17.4	100	12_Malvids
328	Biscutella auriculata	0	6.6	35.14	0.19	0.18	0.17	0	0	0.52	21.84	0	0.51	0.02	1.66	33.17	100	12_Malvids
329	Biscutella laevigata	0	7.49	34.74	0	0.5	0.03	0	0	1.01	18.36	0	0.52	0.05	1.75	35.55	100	12_Malvids
330	Boechera puberula	0	6.5	36.03	0.06	0.39	0.04	0	0.14	3.76	21.45	0.01	1.16	0.09	4.32	26.05	100	12_Malvids
331	Boechera stricta	0	6.64	37.95	0	0.44	0	0.04	0.04	4.12	21.01	0.04	1	0.01	3.89	24.83	100	12_Malvids
332	Schrenkiella parvula	0	9.76	35.08	0	1	0.08	0.36	0.12	4.36	18.96	0.01	1.86	0	5.93	22.49	100	12_Malvids
333	Brassica cretica	0	8.01	37.8	0	0.71	0.03	0	0	1.43	18.23	0	0.49	1.11	1.96	30.22	100	12_Malvids
334	Brassica juncea	0.18	7.42	36.38	0.06	0.87	0.01	0.02	0.05	1.48	18.25	0.18	0.78	0.26	2.86	31.19	100	12_Malvids
335	Brassica napus	0	8.58	39.16	0.05	0.95	0.06	0	0.32	1.59	21.32	0.51	0.53	0	2.04	24.88	100	12_Malvids
336	Brassica nigra	0	7.15	40.58	0	0.49	0.02	0	0.05	1.63	19.31	0.01	0.72	0	2.74	27.3	100	12_Malvids
337	Brassica oleracea	0	9.29	34.44	0	0.65	0.03	0	0.02	0.94	17.82	0.05	0.55	0.35	3.85	32.02	100	12_Malvids
338	Brassica rapa	0.06	9.92	20.28	0	0.97	0.03	0.01	0	1.65	19.66	0.17	0.85	0.58	3.25	42.57	100	12_Malvids
339	Erucastrum elatum	0	10.44	21.84	0.01	1.64	0.18	0	0	5.07	22.04	0.04	0.9	0.49	3.26	34.09	100	12_Malvids
340	Raphanus raphanistrum	0.03	10.42	23.08	0.13	1.5	0.1	0	0	2.18	20.83	0.02	1.01	0.74	3.51	36.45	100	12_Malvids
341	Raphanus sativus	0	10.36	26.09	0	1.18	0.13	0	0.05	2.06	19.28	0.02	0.94	1.04	3.35	35.51	100	12_Malvids
342	Arabidopsis halleri	0	10.36	29.76	0.04	1.23	0.3	0	0	10.6	21.86	0.04	1.07	0.35	3.7	20.7	100	12_Malvids
343	Arabidopsis lyrata	0	7.76	34.64	0	0.83	0.24	0	0	15.63	17.35	0.14	0.97	0.25	3.52	18.66	100	12_Malvids
344	Arabidopsis thaliana	0	5.72	34.17	0.41	0.7	0.1	0	0	12.18	18.41	0.18	2.1	3.46	6.99	15.58	100	12_Malvids
345	Camelina sativa	0.03	8.9	43.33	0	0.3	0.08	0	0.03	7.96	13.92	0	0.9	0.94	3.64	19.96	100	12_Malvids
346	Capsella bursa-pastoris	0.12	7.6	24.95	0	0.69	0.14	0.07	0.05	7.78	18.44	0	1.74	10.67	6.34	21.41	100	12_Malvids
347	Capsella rubella	0.04	6.96	27.43	0	0.69	0.1	0	0	10.34	17.76	0.04	1.87	6.42	7.11	21.24	100	12_Malvids
348	Barbarea vulgaris	0	7.37	38.05	0	0.9	0.03	0.06	0.07	4.65	15.77	0	1.68	0.16	6.03	25.23	100	12_Malvids
349	Leavenworthia alabamica	0.35	6.3	37.22	0	1.29	0.04	0	0.06	2.62	22.67	0.03	1.28	0.44	5.21	22.5	100	12_Malvids
350	Nasturtium officinale	0	4.79	45.5	0	0.22	0	0	0	1.26	17.21	0.16	1.34	0	5.48	24.04	100	12_Malvids
351	Noccaea caerulescens	0.56	4.03	44.74	0	0.49	0	0	0	4.23	16.49	0.03	1.56	0	5.7	22.18	100	12_Malvids
352	Noccaea goesingensis	0	11.35	27.43	0.03	1.09	0.39	0.04	0.05	3.36	13.6	0.04	1.78	0.26	6.03	34.55	100	12_Malvids
353	Raparia bulbosa	0	6.33	39.19	0	0.74	0.32	0	0	2.76	15.53	0.03	1.44	0.17	5.49	27.99	100	12_Malvids
354	Conringia planisiliqua	0	4.15	48.26	0	0.71	0	0.13	0.03	1.65	12.33	0.78	0.87	0.03	3.57	27.5	100	12_Malvids
355	Cochlearia officinalis	0	3.87	17.67	0.08	0.56	0.06	0	0.02	3.18	30.51	0.18	1.13	0.6	4.18	37.95	100	12_Malvids
356	Crucihimalaya himalaica	0	6.16	46.71	0	0.16	0.03	0	0.3	3.07	21.91	0.01	0.48	0.12	2.03	19.04	100	12_Malvids
357	Erysimum cheiri	0	10.95	27.21	0	1.63	0.31	0	0.01	7.97	17.91	0.04	2.36	0.44	8.08	23.1	100	12_Malvids
358	Erysimum pusillum	0	10.6	27.23	0	1.26	0.06	0.22	0	7.43	16.28	0.08	2.62	0.23	8.67	25.32	100	12_Malvids
359	Euclidium syriacum	0	6.23	48.71	0	0.44	0	0.02	0	3.78	11.76	0.34	0.62	0.13	2.15	25.83	100	12_Malvids
360	Eutrema heterophyllum	0.06	4.94	49	0	0.31	0.1	0	0	2.46	19.59	0.02	0.48	0.15	1.64	21.26	100	12_Malvids
361	Eutrema salsugineum	0	4.09	59.52	0	0.25	0	0.11	0	3.25	10.29	0	0.46	0.27	1.61	20.16	100	12_Malvids
362	Eutrema yunnanense	0	4.66	57.2	0.04	0.46	0.04	0.02	0	2.83	16.15	0.14	0.34	0.03	1.24	16.83	100	12_Malvids
363	Iberis amara	0.04	13.57	28.71	0.04	0.57	0.07	0	0.03	2.1	20.34	0	0.64	0.04	2.45	31.39	100	12_Malvids
364	Iberis pinnata	0	9.7	51.23	0	0.48	0.05	0	0	0.93	18.16	0	0.31	0.24	1.25	17.65	100	12_Malvids
365	Isatis lusitanica	0	9.37	38.4	0	0.51	0.15	0.09	0	4.89	14.93	0	1.31	0	4.09	26.26	100	12_Malvids
366	Isatis tinctoria	0	12.42	31.12	0	0.75	0.17	0	0	4.59	15.09	0	1.04	0.02	3.44	31.37	100	12_Malvids
367	Kernera saxatilis	0	10.51	31.2	0	0.59	0.4	0.19	0	3.6	20.44	0.16	2.34	0	8.13	22.42	100	12_Malvids
368	Lepidium africanum	0	11.65	46.2	0	0.12	0	0	0	4.72	17.93	0	0.63	0	2.26	16.5	100	12_Malvids
369	Lepidium aucheri	0	9.76	49.69	0	0.08	0	0	0	5.46	15.3	0	0.51	0.02	1.44	17.73	100	12_Malvids
370	Sisymbrium altissimum	0	7.42	41.85	0	0.35	0.04	0	0	3.36	18.43	0	1.22	0	4.08	23.25	100	12_Malvids
371	Sisymbrium irio	0	6.59	37.44	0	0.23	0.02	0	0	2.79	12.02	0	0.8	0.1	2.59	37.42	100	12_Malvids
372	Macropodium nivale	0	7.12	48.34	0	0.26	0.4	0	0	2.29	14	0.06	0.95	0.12	3.84	22.61	100	12_Malvids
373	Pseudoturritis turrita	0	6.13	51.21	0	0.45	0.19	0.16	0	1.44	19.84	0.25	0.46	0	1.68	18.18	100	12_Malvids
374	Turritis glabra	0	8.92	46.08	0	0.31	0.09	0	0	6.58	21.35	0	1.33	0.16	4.98	10.18	100	12_Malvids
375	Thlaspi arvense	0.01	2.31	69.8	0	0.05	0.01	0.03	0	2.16	5.2	0.03	0.31	0.39	1.05	18.64	100	12_Malvids
376	Carica papaya	0	5.39	68.4	0.1	0.01	0	0	0.04	0.01	3.09	0.13	0.58	3.25	2.85	16.17	100	12_Malvids
377	Tarenaya hassleriana	0	1.73	59.2	0	0.25	0	0	0	0.24	10.55	0.17	0.58	0.18	3.83	23.27	100	12_Malvids
378	Santalum album	0.06	5.14	22.06	0	0.44	0	0	0	0.76	10.52	0.43	1.16	0	4.91	54.52	100	13_Super_asterids
379	Amaranthus hypochondriacus	0	12.53	16.78	0.01	0.72	0	0.01	0	0.5	9.56	0	1.01	0.06	3.63	55.18	100	13_Super_asterids
380	Carnegiea gigantea	0	5.52	59.23	0	0.32	0.05	0.06	0.05	0.78	11.12	0.01	0.26	0.08	1.19	21.32	100	13_Super_asterids
381	Lophocereus schottii	0.53	6.29	52.35	0	0.32	0	0	0	1.53	9.45	0	0.27	0.22	1.03	28.01	100	13_Super_asterids
382	Pachycereus pringlei	0	5.74	50.36	0	0.38	0	0	0.06	0.61	10.55	0.01	0.26	0.45	0.97	30.61	100	13_Super_asterids
383	Stenocereus thurberi	0.05	7.58	53.05	0	0.22	0	0	0.13	1.16	9.29	0.02	0.27	0.14	1.03	27.06	100	13_Super_asterids
384	Pereskia humboldtii	0.03	8.16	19.57	0	0.05	0	0	0	0.46	2.9	0	0.49	0.27	1.9	66.16	100	13_Super_asterids
385	Dianthus caryophyllus	0.01	3.73	32.48	0	0.27	0.04	0	0.16	0.75	9.05	0	0.49	0.03	2.9	50.09	100	13_Super_asterids
386	Silene latifolia	0	11.93	26.92	0	0.95	0	0.01	0.06	0.44	7.02	0	0.51	0.79	2.32	49.05	100	13_Super_asterids
387	Beta vulgaris	0.08	6.73	30.31	0.29	0.35	0	0.09	0.02	0.4	12.35	0.05	0.4	0.06	2.85	46.01	100	13_Super_asterids
388	Beta patula	0.05	9.16	24.48	0.01	0.39	0	0	0.08	0.58	10.09	0.01	0.53	0.05	2.2	52.39	100	13_Super_asterids
389	Bassia scoparia	0.02	6.95	44.41	0.1	0.02	0	0	0.18	0.98	11.2	0.06	0.52	0.31	2.66	32.59	100	13_Super_asterids
390	Spinacia oleracea	0	2.9	52.87	0	0.08	0	0.08	0.02	0.84	13.14	0.05	0.19	0.06	1.14	28.61	100	13_Super_asterids
391	Chenopodium pallidicaule	0	2.68	48.55	0.09	0.09	0	0	0.16	0.03	14.89	0.57	0.46	0.13	2.09	30.25	100	13_Super_asterids
392	Chenopodium quinoa	0	2.03	54.39	0.02	0.04	0	0.01	0	0.04	8.07	0.11	0.35	0.29	1.76	32.89	100	13_Super_asterids
393	Chenopodium suecicum	0.07	3.68	49.39	0.05	0.01	0	0.05	0.29	0.15	13.17	0.04	0.42	0.27	2.4	30	100	13_Super_asterids
394	Drosera capensis	0.3	3.09	43.77	0	0.33	0	0	0	0.41	4.81	0.05	0.61	5.42	2.4	38.8	100	13_Super_asterids
395	Fagopyrum esculentum	0	4.88	68.86	0.09	0.38	0.2	0.02	0	1.3	4.97	0.27	0.13	0.05	0.55	18.3	100	13_Super_asterids
396	Fagopyrum tataricum	0	7.66	54.34	0	0.16	0	0	0.06	0.42	7.73	1.03	0.26	0.03	1.49	26.82	100	13_Super_asterids
397	Nyssa sinensis	0	11.46	39	0	0.17	0	0.01	1.07	0.07	20.5	0.05	0.32	2.11	1.93	23.31	100	13_Super_asterids
398	Actinidia chinensis	0.02	1.85	30.23	0	0.98	0.07	0.02	0.02	0.29	13.09	0.03	0.66	0.11	2.62	50.02	100	13_Super_asterids
399	Actinidia eriantha	0.02	1.75	34.34	0	0.59	0	0	0.05	0.76	13.05	0.03	0.64	0	2.5	46.26	100	13_Super_asterids
400	Monotropa hypopitys	0	1.59	50.15	0	0.07	0	0	0	0.36	5.25	0	0.09	0.07	0.35	42.08	100	13_Super_asterids
401	Vaccinium macrocarpon	0	5.43	21.78	0.02	1.38	0	0.07	0	0.66	13.36	0	0.45	0.82	2.07	53.97	100	13_Super_asterids
402	Embelia ribes	0	2.28	37.11	0.12	0.49	0	0	0	0.27	13.86	0.16	0.41	0.11	1.96	43.23	100	13_Super_asterids
403	Primula veris	0	3.85	19.95	0.03	0.31	0	0.25	0	0.09	13.59	0.02	0.64	0.49	2.85	57.93	100	13_Super_asterids
404	Argania spinosa	0	6.29	28.86	0.22	0.41	0	0.02	0.27	0.61	6.7	0.12	0.81	0.04	3.53	52.12	100	13_Super_asterids
405	Camellia sinensis	0	1.77	49.29	0	0.05	0	0.04	0.05	0.66	4.77	0.04	0.3	1.77	1.86	39.4	100	13_Super_asterids
406	Andrographis paniculata	0	0.72	33.19	0	0.63	0	0	0.21	0.4	11.14	0.19	0.72	0.08	4.27	48.44	100	14_Lamiids
407	Handroanthus impetiginosus	0	1.61	28.47	0	0.04	0	0	0.02	1.87	10.27	0.05	0.63	0.08	2.61	54.36	100	14_Lamiids
408	Dorcoceras hygrometricum	0	0.13	72.3	0	0	0	0	0	2.31	1.83	0.01	0.03	0.09	0.21	23.1	100	14_Lamiids
409	Pogostemon cablin	0	2.36	46.77	0.08	0	0	0.69	0.05	1.18	7.32	0.17	0.41	0	2	38.98	100	14_Lamiids
410	Scutellaria baicalensis	0	0.74	31.46	0.52	0	0	0	0.01	2.37	22.1	0.02	0.39	0.04	2.25	40.08	100	14_Lamiids
411	Perilla citriodora	0	1.26	41.74	0	0.52	0	0	0.35	0.44	9.83	0	0.33	0.09	2.08	43.38	100	14_Lamiids
412	Salvia splendens	0.01	3.85	43.23	0.01	0.03	0	0	0	0.55	20.34	0.11	0.27	0.19	1.77	29.62	100	14_Lamiids
413	Genlisea aurea	0	2.05	1.44	0	0.02	0	0.04	0	0.44	10.16	0	2.24	0.04	15.01	68.57	100	14_Lamiids
414	Utricularia gibba	0	0.35	46.53	0.13	0	0	0.09	0	0.15	5.34	8.76	0.53	0	2.35	35.78	100	14_Lamiids
415	Lindernia brevidens	0.02	6.85	51.8	0.02	0.15	0	0	0	0.38	10.48	0.24	0.22	0.92	1.61	27.32	100	14_Lamiids
416	Olea europaea	0	1.43	56.29	0	0.14	0	0	0.09	0.58	7.54	0.08	0.3	0.16	1.27	32.12	100	14_Lamiids
417	Striga asiatica	0.02	4.63	44.03	0	0.11	0	0	0	1.76	12.24	0.03	0.37	0.02	1.84	34.96	100	14_Lamiids
418	Sesamum indicum	0.08	7.56	28.53	0.14	0.06	0	0	0	0.41	11.1	0.27	0.47	0	2.42	48.97	100	14_Lamiids
419	Penstemon barbatus	0	2.88	49.39	0.57	0.11	0	0	0.01	0.54	9.29	0.3	0.25	0.03	1.42	35.21	100	14_Lamiids
420	Cuscuta australis	0.18	4.21	39.78	0.1	0.06	0	0	0	1.69	14.25	0.28	0.26	0.12	2.11	36.96	100	14_Lamiids
421	Cuscuta campestris	0	4.73	28.31	0.47	0.12	0	0	0.05	2.06	15.61	0.15	0.35	0.42	2.16	45.57	100	14_Lamiids
422	Ipomoea batatas	0	5.26	19.3	0	1.56	0	0.01	0	1.56	12.38	0.01	0.58	0	3.29	56.06	100	14_Lamiids
423	Ipomoea nil	0.19	5.18	41.23	0	1.32	0	0.07	0	1.28	12.49	3.39	0.29	0.14	3.09	31.31	100	14_Lamiids
424	Ipomoea trifida	0.03	3.61	22.48	0	1.64	0	0	0.02	1.89	13.15	0.15	0.5	0.11	3.59	52.84	100	14_Lamiids
425	Ipomoea triloba	0.06	3.62	33.15	0.02	1.51	0	0.18	0.01	1.77	12.46	0.19	0.48	0.43	3.15	42.97	100	14_Lamiids
426	Nicotiana attenuata	0	2.23	82.58	0.15	0.31	0	0	0	0.59	5.15	0.11	0.11	0.29	0.65	7.85	100	14_Lamiids
427	Nicotiana glauca	0	1.91	86.3	0	0.19	0	0	0	0.61	4.75	0	0.1	0.12	0.42	5.59	100	14_Lamiids
428	Nicotiana knightiana	0	1.94	76.66	0	0.18	0.01	0.01	0	0.49	4.81	0.02	0.09	1.47	3.45	10.87	100	14_Lamiids
429	Nicotiana obtusifolia	0	3.95	76.78	0.04	0.39	0.01	0.01	0	0.82	6.87	0.09	0.13	0.63	0.63	9.64	100	14_Lamiids
430	Nicotiana paniculata	0	2.26	78.68	0	0.22	0.02	0	0	0.46	4.59	0.01	0.08	2.66	0.56	10.47	100	14_Lamiids
431	Nicotiana tabacum	0	1.93	81.99	0.02	0.34	0	0	0	0.67	4.53	0.01	0.12	0.67	0.53	9.2	100	14_Lamiids
432	Nicotiana undulata	0.04	2.26	78.97	0	0.27	0	0.08	0	0.38	4.58	0	0.08	0.22	0.53	12.59	100	14_Lamiids
433	Capsicum annuum	0	2.64	78.75	0	0.33	0	0.07	0	0.14	9.1	0.08	0.14	0.02	0.59	8.15	100	14_Lamiids
434	Capsicum baccatum	0	2.89	70.88	0	0.35	0.13	0	0	0.21	7.68	0.81	0.13	0.37	0.62	15.93	100	14_Lamiids
435	Capsicum chinense	0.01	2.25	63.84	0	0.32	0.01	0	0.08	0.22	9.01	0.05	0.14	0.76	0.57	22.74	100	14_Lamiids
436	Jaltomata sinuosa	0.03	2.23	71.34	0	0.38	0.01	0	0	0.17	7.26	0.03	0.13	0.03	0.51	17.87	100	14_Lamiids
437	Solanum arcanum	0	3.1	68.8	0	0.52	0.83	0	0.01	0.37	11.58	0.08	0.33	0.27	1.5	12.62	100	14_Lamiids
438	Solanum chilense	0	4.46	73.44	0	0.38	0.29	0	0	0.12	12.14	0.02	0.29	0.01	1.19	7.65	100	14_Lamiids
439	Solanum habrochaites	0	2.78	72.22	0	0.37	0.84	0	0.02	0.35	10.98	0.05	0.31	0	1.31	10.78	100	14_Lamiids
440	Solanum lycopersicum	0	2.64	74.39	0	0.35	0.68	0	0	0.1	10.24	0.05	0.27	0	1.3	9.98	100	14_Lamiids
441	Solanum pennellii	0	2.9	74.43	0	0.61	0.61	0	0	0.34	9.48	0.03	0.23	0.12	2.39	8.85	100	14_Lamiids
442	Solanum melongena	0	4.53	72.23	0	0.41	0.08	0	0	0.17	6.15	0.04	0.2	0.08	0.84	15.28	100	14_Lamiids
443	Asclepias syriaca	0	3.35	52.08	0.24	0.14	0	0	0.03	0.45	1.56	0.42	0.3	0.07	1.03	40.34	100	14_Lamiids
444	Calotropis procera	0	6.2	43.26	0	0	0	0	0	0.13	2.76	0.04	1.66	0	7.55	38.39	100	14_Lamiids
445	Rhazya stricta	0	1.57	51.71	0.03	0.07	0	0	0.29	0.64	7.12	0.11	0.47	0	1.56	36.42	100	14_Lamiids
446	Catharanthus roseus	0.01	3.43	37.71	0	0.05	0	0.36	0.16	0.29	12.66	0.09	0.33	0.02	1.42	43.48	100	14_Lamiids
447	Coffea arabica	0.02	2.35	61.72	0	0.1	0	0.04	0.07	0.59	4.99	0	0.24	0.17	0.94	28.77	100	14_Lamiids
448	Coffea canephora	0	2.96	54.62	0	0.09	0	0	0.09	0.84	6.07	0	0.32	0.07	1.53	33.4	100	14_Lamiids
449	Coffea eugenioides	0.06	2.38	61.84	0	0.08	0	0	0	1.02	5.02	0.04	0.23	0.18	0.9	28.25	100	14_Lamiids
450	Echium plantagineum	0	7.81	17.3	0	2.66	0	0.07	0.12	0.53	17.84	0.72	0.41	0.39	2.14	50.01	100	14_Lamiids
451	Mikania micrantha	0.04	1.51	67.26	0	0.1	0	0.09	0.05	0.25	9.46	0	0.16	0.1	0.99	19.98	100	15_Campanulids
452	Artemisia annua	0	4.08	49.13	0.16	0.06	0	0	0	1.43	6.84	0	0.24	0.03	1.81	36.22	100	15_Campanulids
453	Erigeron canadensis	0	4.61	13.82	0	1.14	0	0	0	2.15	7.11	0.01	0.6	0.01	3.65	66.91	100	15_Campanulids
454	Helianthus annuus	0.02	1.69	61.8	0.06	0.07	0	0.01	0	0.62	3.79	0.04	0.12	0.49	0.9	30.4	100	15_Campanulids
455	Cynara cardunculus var. scolymus	0.24	2.25	42.59	0.17	0.22	0	0.05	0.96	0.61	9.68	0.08	0.17	0.25	1.57	41.16	100	15_Campanulids
456	Lactuca sativa	0	1.19	57.22	0	0.57	0	0.19	0.01	0.1	3.68	0	0.11	1.18	0.74	35	100	15_Campanulids
457	Codonopsis pilosula	0.03	5.33	39	0	0.15	0	0.12	0.04	1.46	11.89	0.01	0.23	0	1.64	40.11	100	15_Campanulids
458	Platycodon grandiflorus	0	4.74	39.61	0.14	0.14	0	0	0.02	0.72	18.08	0.02	0.35	0	2.29	33.88	100	15_Campanulids
459	Daucus carota	0	2.31	31.7	0.09	0.1	0	0	0.03	1.13	16.54	0.08	0.47	0.09	2.15	45.31	100	15_Campanulids

## Sheet: 2d number
Supplementary Table 2d The number of actutal repeat in different plant genome
Calculation method: The repeat name based on the DFAM database, according the result of homo annonation Repeatmask, the sum of the number of each repeat sequence was counted.
NO	Species name	DIRS	LINE	LTR	PLE	SINE	unknown	Circular_dsDNA	DNA_Polymerase	Rolling_Circle	TIR	RNA	Low_complexity	Satellite	Simple_repeat	Unknown	species_type
1	Chloropicon primus	0	0	21	0	0	0	0	0	0	487	0	2230	0	15485	1006	01_Alage
2	Edaphochlamys debaryana	102	3980	1171	38	105	0	0	0	1011	751	0	21419	0	92844	29406	01_Alage
3	Bathycoccus prasinos	0	0	168	21	0	0	0	103	0	746	0	2226	0	14588	591	01_Alage
4	Ostreococcus tauri	0	16	0	0	0	0	0	0	12	89	0	234	12	7879	969	01_Alage
5	Micromonas	41	21	55	14	0	0	96	0	27	372	0	176	0	9190	1329	01_Alage
6	Micromonas commoda	0	0	114	0	0	0	0	0	17	0	0	446	0	6082	15318	01_Alage
7	Micromonas pusilla	0	0	23	0	0	0	0	47	0	123	0	912	0	13358	1489	01_Alage
8	Bathycoccus	0	0	36	0	0	0	34	0	0	115	0	1144	0	35231	8908	01_Alage
9	unclassified Mamiellophyceae	24	112	93	27	69	0	43	128	0	1140	0	1227	16	11926	354	01_Alage
10	Cymbomonas tetramitiformis	0	0	0	0	0	0	0	0	0	0	0	192	0	1899	647	01_Alage
11	Chlamydomonas	3625	8120	13822	457	703	0	546	126	362	11379	0	3863	181	45492	224612	01_Alage
12	Chlamydomonas applanata	0	560	47	0	94	0	0	0	234	773	0	24002	0	97242	26335	01_Alage
13	Chlamydomonas applanata	26	6080	1647	0	0	0	63	0	0	527	0	5151	0	51678	13772	01_Alage
14	Chlamydomonas asymmetrica	36	8430	1676	124	0	0	0	0	61	4280	0	3890	161	79779	47804	01_Alage
15	Chlamydomonas debaryana	48	4013	1438	0	182	0	0	0	1120	756	0	21471	0	93038	29411	01_Alage
16	Chlamydomonas eustigma	0	1147	1615	0	0	0	0	24	283	21	0	670	0	9842	8453	01_Alage
17	Chlamydomonas reinhardtii	44	18529	1368	75	383	0	0	875	1990	15111	159	11533	309	116038	40255	01_Alage
18	Chlamydomonas sphaeroides	193	5595	1249	93	19	0	0	0	54	366	0	15479	0	108900	36561	01_Alage
19	Chloromonas	100	5462	677	0	51	0	179	739	0	2983	89	2197	244	33003	73214	01_Alage
20	Eudorina	442	21197	6238	1041	3089	0	0	124	2416	19402	1010	13730	1033	138867	94542	01_Alage
21	Gonium pectorale	314	6791	2116	105	242	0	0	0	275	1925	0	12964	0	86028	48955	01_Alage
22	Volvox carteri	1598	19921	11575	174	1177	0	477	304	2537	15547	601	9390	970	118971	43228	01_Alage
23	Yamagishiella unicocca	384	13343	9595	98	932	0	0	0	197	4783	1305	9647	187	80276	66108	01_Alage
24	Haematococcus	0	7490	1478	830	50	0	968	0	0	772	0	4144	47	43465	13674	01_Alage
25	Haematococcus lacustris	960	84858	44991	425	217	0	4526	1618	7374	23541	0	36158	858	309348	325361	01_Alage
26	Characiochloris	119	3760	638	286	20	0	0	451	0	2850	66	1925	86	31416	68827	01_Alage
27	Dunaliella	0	959	223	0	0	0	0	0	0	4466	0	608	0	15427	3184	01_Alage
28	Dunaliella salina	183	119181	14564	1107	87	0	104	0	460	20186	1009	4241	490	137812	301462	01_Alage
29	Tetrabaena socialis	0	6603	1197	32	0	0	0	0	530	5439	0	10401	119	77682	64191	01_Alage
30	Mychonastes homosphaera	0	0	227	0	0	0	0	0	0	196	0	5005	0	63709	598	01_Alage
31	Messastrum gracile	0	498	103	0	0	0	0	0	0	1384	0	11273	18	82404	3281	01_Alage
32	Monoraphidium	0	39718	9112	47	204	0	262	48	0	1118	0	555	0	27952	22682	01_Alage
33	Monoraphidium neglectum	0	3077	44	0	0	0	0	0	0	9536	0	3763	0	66340	3334	01_Alage
34	Raphidocelis subcapitata	12	1047	173	0	0	0	0	0	0	112	0	8861	0	84836	4317	01_Alage
35	Desmodesmus armatus	73	30756	1847	297	421	0	500	214	8	2517	86	6437	356	91472	18407	01_Alage
36	Scenedesmus	42	57151	11435	0	18	0	69	0	20	1673	0	968	21	102334	12302	01_Alage
37	Scenedesmus quadricauda	0	805	52	0	136	0	0	0	0	3004	58	1753	0	45869	3659	01_Alage
38	Scenedesmus vacuolatus	0	10026	1655	0	0	0	0	0	0	0	0	173	0	11710	2397	01_Alage
39	Coelastrella	0	28018	2113	0	90	0	0	0	0	324	0	456	0	29636	22584	01_Alage
40	Tetradesmus obliquus	97	80101	2232	0	0	0	50	18	208	2129	0	1171	0	123616	15485	01_Alage
41	Tetraselmis striata	8596	24897	12463	30	190	0	109	100	4812	17034	70	8739	160	116605	149132	01_Alage
42	Picocystis	23	150	1838	0	29	0	54	11	0	797	46	626	0	2868	2655	01_Alage
43	Ulva mutabilis	80	10449	9106	367	38	0	0	0	119	708	0	759	0	18891	39549	01_Alage
44	Ulva prolifera	44	2388	3132	32	98	0	0	0	77	2765	172	861	28	18537	34619	01_Alage
45	Parachlorella kessleri	0	1551	72	0	0	0	34	0	20	88	0	1696	0	23492	11946	01_Alage
46	Helicosporidium	0	0	0	0	0	0	0	0	0	0	0	443	14	2569	981	01_Alage
47	Auxenochlorella pyrenoidosa	0	208	65	0	0	0	0	0	0	53	0	5302	0	47612	2302	01_Alage
48	Auxenochlorella protothecoides	0	15	0	0	0	0	0	0	0	96	17	1410	0	7676	831	01_Alage
49	Micractinium conductrix	48	7340	1255	0	160	0	0	0	450	1963	0	7757	0	85885	5511	01_Alage
50	Chlorella sorokiniana	0	1483	2326	0	85	0	0	0	0	912	0	2309	0	47862	2675	01_Alage
51	Chlorella variabilis	0	1262	551	0	0	0	0	0	79	447	0	4543	0	58054	3655	01_Alage
52	Chlorella vulgaris	0	1268	60	0	0	0	0	0	0	204	0	2321	0	39099	1825	01_Alage
53	Prototheca bovis	0	0	0	0	0	0	0	0	0	463	0	6729	70	33007	1526	01_Alage
54	Prototheca ciferrii	0	0	0	0	155	0	0	0	0	313	0	5226	0	30200	1332	01_Alage
55	Prototheca cutis	0	82	11	0	0	0	0	0	0	29	0	496	0	8236	1048	01_Alage
56	Prototheca stagnorum	0	0	0	0	0	0	41	0	0	0	0	2538	0	12995	1560	01_Alage
57	Prototheca wickerhamii	0	12	254	0	31	0	0	0	0	0	0	807	0	9398	1204	01_Alage
58	Prototheca zopfii	0	0	123	0	35	0	40	0	0	253	0	6727	49	32984	2266	01_Alage
59	Chloroidium	0	64	0	0	0	0	0	0	0	0	0	1741	0	14132	1660	01_Alage
60	Chlorella	0	285	38	0	0	0	0	0	0	94	0	8484	0	62298	2086	01_Alage
61	Picochlorum	0	22	0	0	0	0	0	0	0	18	0	280	0	2143	424	01_Alage
62	Botryococcus braunii	372	10739	21186	180	0	0	212	0	314	88981	127	13290	5002	147285	43353	01_Alage
63	Coccomyxa	0	622	64	0	0	0	0	0	0	24	0	281	0	4516	2490	01_Alage
64	Coccomyxa subellipsoidea C-169	0	1036	38	0	0	0	0	0	0	450	26	391	0	7132	9752	01_Alage
65	unclassified Trebouxiophyceae	582	1041	432	0	0	0	24	0	0	720	0	2007	23	27580	5957	01_Alage
66	Trebouxia	0	4784	2661	0	0	0	0	0	226	193	33	758	0	14076	20101	01_Alage
67	Trebouxia gelatinosa	71	1335	553	0	0	0	0	0	104	356	0	296	0	8993	5401	01_Alage
68	Chlorokybus atmophyticus	796	2267	6681	0	113	0	180	0	0	17256	0	1610	129	32711	11554	01_Alage
69	Mesostigma viride	752	19209	1245	320	0	0	0	195	58	3798	0	5145	1	59024	138194	01_Alage
70	Klebsormidium nitens	65	449	1023	0	0	0	0	0	0	397	103	1166	0	8337	14714	01_Alage
71	Chara braunii	9157	111683	266222	5224	26483	0	9847	2771	22840	294282	91398	87168	39583	816899	1899967	01_Alage
72	Mesotaenium endlicherianum	1049	1674	19778	39	30	0	0	102	121	20501	0	15419	148	102882	29046	01_Alage
73	Physcomitrella patens	0	9511	148772	0	82	0	0	0	6250	14859	243	25324	285	177527	44480	02_Bryophyte
74	Pleurozium schreberi	480	2980	6728	95	137	0	0	446	963	24248	139	4374	369	27183	331039	02_Bryophyte
75	Marchantia inflexa	0	3761	49229	174	193	0	0	389	2941	16834	0	3986	53	21266	154282	02_Bryophyte
76	Marchantia polymorpha	152	3543	24017	125	411	0	148	0	1020	8190	341	7841	1	51728	58198	02_Bryophyte
77	Selaginella kraussiana	31	15442	17241	306	1828	0	0	72	1539	6253	572	3348	0	19831	86737	03_Lycophytes
78	Selaginella moellendorffii	0	2960	62820	387	1874	0	77	380	7074	14849	945	5412	147	35610	44725	03_Lycophytes
79	Selaginella tamariscina	281	19069	67228	3007	7048	0	801	1025	874	151906	840	11940	99	152292	100256	03_Lycophytes
80	Adiantum capillus-veneris	0	254576	1745350	24202	5162	0	1018	2220	9981	495557	0	44488	6598	1044286	2315758	04_Fern
81	Azolla filliculoides	0	68581	185022	1000	12387	0	0	764	8130	40083	4469	11636	3665	162141	195081	04_Fern
82	Salvinia cucullata	0	15667	44943	0	7210	0	0	46	3179	12500	2505	3995	633	39521	107164	04_Fern
83	Gnetum montanum	0	233969	1355150	9911	37807	0	0	26874	11238	98178	1799	47603	29457	217481	2439796	05_Gymnosperms
84	Sequoiadendron giganteum	0	281305	2571028	23644	4339	5507	24105	5479	14190	706449	997	156449	32309	744654	3010206	05_Gymnosperms
85	Amborella trichopoda	0	63512	247882	0	4092	0	0	522	1716	438235	1294	32631	191	168907	95851	06_ANA
86	Nymphaea colorata	699	13365	60554	2910	150	0	405	100	4364	100584	2907	17954	241	126689	161414	06_ANA
87	Cinnamomum micranthum	189	59877	147557	0	11242	0	741	163	8217	137565	596	39036	2817	263758	639235	07_Magnoliids
88	Persea americana	19	34926	92932	1726	2727	0	1131	453	2550	62777	125	21101	4180	125942	355652	07_Magnoliids
89	Liriodendron chinense	966	82453	558215	0	1653	0	0	5045	3869	469487	1341	41108	274	357210	1590716	07_Magnoliids
90	Magnolia ashei	182	39340	108727	0	741	667	0	189	1297	129090	287	9166	852	55071	478884	07_Magnoliids
91	Spirodela polyrhiza	145	644	16803	204	0	0	0	0	122	3845	0	7542	129	61830	21221	08_Monocots
92	Zostera marina	0	18789	44739	62	193	0	0	0	290	27269	219	6946	329	33015	117402	08_Monocots
93	Dioscorea alata	609	20746	197136	127	555	0	479	0	1875	89868	860	41851	1542	266224	324219	08_Monocots
94	Dioscorea rotundata	584	12947	116452	1166	454	0	556	0	1334	70133	197	27884	284	177617	183193	08_Monocots
95	Trichopus zeylanicus	1429	3499	122938	0	1282	0	0	3727	2353	140314	1094	20553	533	110926	265166	08_Monocots
96	Xerophyta viscosa	0	14184	42354	103	3419	0	232	1081	2048	84770	303	16352	1674	128959	233181	08_Monocots
97	Asparagus officinalis	0	34428	568497	516	350	0	1081	391	13638	149400	0	25184	165	162392	753123	08_Monocots
98	Apostasia shenzhenica	532	39503	70577	0	903	0	0	402	716	74793	767	18472	687	97155	290588	08_Monocots
99	Gastrodia elata	0	72179	333826	0	831	0	0	0	5915	102356	531	21580	568	157033	582904	08_Monocots
100	Dendrobium catenatum	0	92789	349519	900	10796	0	0	287	2830	173397	0	41456	5537	200233	1186684	08_Monocots
101	Phalaenopsis aphrodite	1442	54131	297733	0	269	0	0	0	2077	106983	0	28836	7630	164316	581417	08_Monocots
102	Phalaenopsis equestris	1437	75679	380909	0	0	0	0	0	1232	132478	0	34025	2439	183832	765309	08_Monocots
103	Vanilla planifolia	0	108787	475514	1255	2594	0	0	0	795	68409	5560	101711	0	366507	917280	08_Monocots
104	Cocos nucifera	0	19637	887432	0	3210	0	764	1252	1263	206525	0	43283	15661	241793	815490	08_Monocots
105	Elaeis guineensis	2519	19064	359487	0	2691	0	951	0	1004	141212	0	37718	9393	177714	492696	08_Monocots
106	Elaeis oleifera	152	29168	380984	0	4370	0	1027	1052	1547	125595	98	34334	13000	165927	450459	08_Monocots
107	Calamus simplicifolius	1658	95720	466490	8579	2381	0	2420	0	6497	232325	6612	53419	14889	321592	734886	08_Monocots
108	Ananas comosus	2999	10303	93596	204	90	0	0	604	1965	104292	587	26102	746	172371	335862	08_Monocots
109	Raddia distichophylla	0	26449	193000	200	2989	5463	0	898	18749	232409	404	16135	152	109251	375451	08_Monocots
110	Leersia perrieri	0	13186	53157	0	4117	3325	0	0	17146	140969	31	7744	53	61180	24979	08_Monocots
111	Oryza barthii	0	14113	56373	0	6938	4234	0	0	59773	236371	56	9773	647	80122	11691	08_Monocots
112	Oryza brachyantha	0	3944	36573	0	2697	747	0	0	54377	207510	0	7926	194	65592	21171	08_Monocots
113	Oryza glaberrima	0	12738	60732	0	5564	3827	0	0	56891	229307	755	9851	164	84538	13346	08_Monocots
114	Oryza glumipatula	0	12813	63582	0	4532	4204	177	0	58634	229011	0	10300	108	89858	8269	08_Monocots
115	Oryza longistaminata	0	15425	72527	0	8839	4004	0	0	64907	252354	217	11179	393	96955	10985	08_Monocots
116	Oryza meridionalis	0	11514	63129	0	5989	3813	44	0	52015	212434	0	9040	129	77674	10049	08_Monocots
117	Oryza meyeriana var. granulata	0	7948	244127	0	2147	844	0	0	38857	199927	902	11290	559	79509	73654	08_Monocots
118	Oryza punctata	0	9037	98454	0	5144	3898	0	0	33688	198721	0	10212	62	78705	14497	08_Monocots
119	Oryza rufipogon	0	13415	93226	0	4928	4300	0	0	54517	259110	0	10886	1351	94608	11579	08_Monocots
120	Oryza sativa	0	11819	62290	0	5199	3699	0	0	55916	238678	275	11018	1015	98001	13093	08_Monocots
121	Oryza sativa f. spontanea	119	13339	62220	0	5727	3362	0	0	55648	233832	39	10488	93	91620	8097	08_Monocots
122	Zizania latifolia	0	8483	123098	8	1134	926	0	0	11560	182694	0	8612	800	68906	111505	08_Monocots
123	Brachypodium distachyon	56	15105	35417	138	1866	2605	59	0	6681	95489	433	6231	176	44605	66276	08_Monocots
124	Dactylis glomerata	0	69111	965410	0	3193	16149	0	0	12308	278870	0	11006	692	74751	644016	08_Monocots
125	Lolium perenne	0	82275	134134	0	4227	19858	0	0	7547	100174	0	10178	315	64394	266703	08_Monocots
126	Hordeum pubiflorum	0	91771	1867408	0	10393	24954	0	281	26284	454568	0	21341	539	141376	807443	08_Monocots
127	Hordeum vulgare	0	57264	1319795	0	5005	14762	0	0	21306	464057	849	37718	17784	226726	381881	08_Monocots
128	Aegilops tauschii	0	91815	1105475	0	3314	14153	0	1370	72603	820998	2519	36670	10513	249366	529320	08_Monocots
129	Triticum aestivum	10063	324965	3886312	0	4317	42496	0	4197	206446	2618519	3057	121350	8542	774735	2185525	08_Monocots
130	Triticum dicoccoides	0	212615	2875136	0	27925	44210	0	0	98762	1856397	0	82815	9716	565800	1389257	08_Monocots
131	Triticum urartu	0	84847	1273122	2915	3762	16610	0	1428	50896	748094	0	41249	11228	254610	702558	08_Monocots
132	Eleusine coracana	0	37672	728024	0	6118	1560	0	0	14883	197674	606	18561	400	157968	292153	08_Monocots
133	Eleusine indica	473	23710	199592	0	3832	1055	0	0	8709	99006	0	8122	204	60271	122728	08_Monocots
134	Oropetium thomaeum	66	8505	34817	0	2812	0	0	0	7082	41185	109	5297	0	55025	70840	08_Monocots
135	Eragrostis curvula	0	25599	91785	779	9162	2137	0	0	11203	151371	66	11468	0	110880	85939	08_Monocots
136	Eragrostis tef	0	27996	66083	0	11179	2615	0	0	8276	119533	104	11614	0	97706	111685	08_Monocots
137	Sporobolus alterniflorus	0	20002	128366	0	6054	1428	0	0	8589	74271	0	4759	472	33820	83177	08_Monocots
138	Zoysia japonica	0	9395	61596	0	4555	209	0	0	10223	112935	0	6308	877	54643	102288	08_Monocots
139	Zoysia matrella	0	15084	109041	0	7079	1269	0	198	29003	187484	0	10279	1530	87910	95992	08_Monocots
140	Zoysia pacifica	0	12075	82416	0	5758	358	117	0	9971	141574	0	7233	1700	61813	112324	08_Monocots
141	Coix aquatica	0	12060	496040	0	3197	353	0	0	13258	247843	366	14908	0	133962	115361	08_Monocots
142	Miscanthus sacchariflorus	0	52780	889200	0	13447	5053	0	0	54009	467543	0	18601	3046	144256	281301	08_Monocots
143	Saccharum hybrid cultivar	341	25034	133737	0	6672	1325	0	0	15584	208168	94	10017	288	83559	77085	08_Monocots
144	Saccharum spontaneum	0	139041	892828	0	33266	12599	0	1620	107694	1016104	0	53353	5747	423396	399941	08_Monocots
145	Sorghum bicolor	224	15995	177115	0	2650	254	0	0	19264	212306	191	9637	5050	99884	40499	08_Monocots
146	Zea mays	0	25910	584478	0	7587	1577	0	0	42769	270808	0	15408	1396	127396	147406	08_Monocots
147	Alloteropsis semialata	0	20732	174861	0	5809	2296	0	138	16591	187393	192	11429	640	85609	120174	08_Monocots
148	Echinochloa crus-galli	0	60528	456101	0	17266	10667	0	711	34035	442627	1157	27422	3205	231591	280992	08_Monocots
149	Cenchrus americanus	0	27281	603307	0	9958	3099	0	0	10562	217174	0	15524	420	114641	313286	08_Monocots
150	Setaria italica	0	12534	83306	0	3226	2613	0	0	5968	114969	0	8367	194	65438	61710	08_Monocots
151	Setaria viridis	0	11157	84065	180	1679	2181	0	0	6306	111633	0	8478	186	65050	54548	08_Monocots
152	Dichanthelium oligosanthes	0	10875	207108	0	2637	213	120	0	7745	130605	0	8098	67	64135	176868	08_Monocots
153	Urochloa ruziziensis	0	24772	333180	0	8617	5560	0	0	15168	212545	0	12091	689	82838	140709	08_Monocots
154	Panicum miliaceum	0	18344	178574	0	6024	2255	0	0	10477	138779	157	15995	1329	135647	115384	08_Monocots
155	Panicum hallii	0	5593	120433	0	2871	1515	0	0	2385	73080	171	7644	663	65254	56489	08_Monocots
156	Eichhornia paniculata	401	24376	194415	0	476	0	0	160	1958	63031	677	23434	555	169690	455676	08_Monocots
157	Musa acuminata	0	9576	136359	0	2422	0	0	1087	268	19662	75	14022	565	97465	126715	08_Monocots
158	Musa balbisiana	0	9954	141683	710	3650	0	980	0	1699	35475	2772	14828	388	112350	120223	08_Monocots
159	Musa itinerans	0	11225	144167	146	3026	0	0	0	652	23240	414	15862	491	106772	152679	08_Monocots
160	Musa schizocarpa	2058	12038	173089	118	3280	0	0	0	116	28921	3848	14377	333	108141	125833	08_Monocots
161	Berberis thunbergii	462	138264	553122	0	11286	0	1239	0	18835	451093	4051	81508	0	409936	1472865	09_Base_eudicots
162	Eschscholzia californica	1541	22418	136918	1180	6696	0	252	2933	7147	66901	467	20986	3224	99790	396197	09_Base_eudicots
163	Macleaya cordata	0	13967	83584	0	1871	0	1714	875	3697	81620	0	22852	1006	110027	345763	09_Base_eudicots
164	Papaver somniferum	0	161041	773238	0	6813	0	1803	2051	7835	197748	230	52983	5499	246883	1548276	09_Base_eudicots
165	Aquilegia coerulea	0	19895	42418	0	4039	0	127	85	2695	32082	376	11860	677	71676	142294	09_Base_eudicots
166	Nelumbo nucifera	0	102081	213643	0	10250	0	1638	239	1792	217930	125	30308	585	159850	557222	09_Base_eudicots
167	Macadamia integrifolia	0	67769	166066	358	20158	0	751	4264	2143	91408	1409	33874	3631	242418	499963	09_Base_eudicots
168	Kalanchoe fedtschenkoi	0	7082	40297	0	109	0	0	0	1705	68267	262	8679	1365	39041	205949	10_Super_rosids
169	Sedum album	58	5794	48909	536	667	0	182	121	1655	37767	262	6867	448	30662	180051	10_Super_rosids
170	Cissus quadrangularis	0	24570	121924	0	176	0	0	0	1208	14690	54	16313	555	65465	189081	10_Super_rosids
171	Vitis aestivalis	0	58439	155096	0	133	0	0	0	3576	17852	465	36423	68	147226	753586	10_Super_rosids
172	Vitis cinerea x Vitis riparia	0	48736	212413	0	1951	0	0	0	3331	150953	203	46477	183	187045	141487	10_Super_rosids
173	Vitis riparia	104	32111	163174	102	577	0	0	97	3711	135480	0	36815	0	166464	119740	10_Super_rosids
174	Vitis vinifera	94	29338	154606	0	764	0	0	0	2614	120717	215	34011	1000	152709	119264	10_Super_rosids
175	Vitis x labruscana x Vitis vinifera	193	27041	159963	0	338	0	0	0	2300	105516	422	31904	3046	139903	84385	10_Super_rosids
176	Aristotelia chilensis	0	2147	2933	0	0	34	0	0	131	3421	0	6183	0	28157	26051	11_Fabids
177	Cephalotus follicularis	0	49909	657818	5416	1191	0	5059	23436	422	123804	0	21227	3962	138586	962905	11_Fabids
178	Populus simonii	0	7538	124229	8	15700	0	0	0	76623	58273	1191	26223	2768	135053	143272	11_Fabids
179	Salix brachista	266	2016	91910	0	24803	0	164	0	60937	47855	494	19008	0	116631	94835	11_Fabids
180	Caryocar brasiliense	0	4573	54435	113	0	0	357	0	148	10316	88	16550	118	63670	82793	11_Fabids
181	Ricinus communis	648	2130	94212	261	953	0	0	0	1167	29999	2199	22284	14157	96208	99470	11_Fabids
182	Jatropha curcas	0	14912	98882	50	674	0	0	0	4258	47850	411	21561	0	113028	140711	11_Fabids
183	Manihot esculenta	2223	9896	178864	88	244	0	0	0	352	55735	0	32640	0	128362	215584	11_Fabids
184	Hevea brasiliensis	1249	13270	602685	0	1059	0	0	0	864	47329	113	45798	0	254978	325766	11_Fabids
185	Linum usitatissimum	0	19570	64594	59	450	0	149	55	702	40388	321	10000	480	52588	125182	11_Fabids
186	Passiflora edulis	0	13396	55307	0	717	0	0	0	470	7916	46	7043	0	31661	150583	11_Fabids
187	Rhizophora apiculata	422	5568	39842	0	2897	0	0	0	1238	6361	456	24033	310	126062	59430	11_Fabids
188	Populus alba	0	6590	112070	264	13834	0	274	0	63511	56851	238	27332	1095	144330	118259	11_Fabids
189	Populus euphratica	271	3821	172993	0	12861	0	0	557	53786	46515	551	30067	256	147862	117745	11_Fabids
190	Populus trichocarpa	0	5400	126147	0	14739	0	186	0	86060	55995	111	24931	4745	124795	119671	11_Fabids
191	Glycine tomentella	0	47533	532208	0	18946	0	10142	409	2673	270102	347	112010	0	523739	668001	11_Fabids
192	Carpinus fangiana	0	23894	90369	179	1448	0	0	489	1538	65469	189	26904	250	151326	268940	11_Fabids
193	Chamaecrista fasciculata	0	25590	120178	89	6968	0	0	0	7229	118250	276	23635	186	140189	350410	11_Fabids
194	Vachellia collinsii	0	22343	83943	0	2181	0	208	244	5996	87946	175	22853	2507	135271	342192	11_Fabids
195	Mimosa pudica	0	26339	81392	0	18318	0	0	0	5902	82859	225	24771	487	124065	623475	11_Fabids
196	Prosopis alba	144	11066	111733	0	2254	0	0	0	5789	94196	372	33557	360	165272	566873	11_Fabids
197	Cercis canadensis	95	8958	69823	86	758	0	0	0	3962	35102	134	18203	1209	83427	190886	11_Fabids
198	Nissolia schottii	0	22502	139263	0	2776	0	2519	1492	2670	101207	300	25736	2970	140912	463464	11_Fabids
199	Arachis duranensis	0	18721	426637	0	10535	0	0	379	6488	121619	0	45502	563	183120	357136	11_Fabids
200	Arachis hypogaea	0	39332	876895	2221	25537	0	1509	1522	10063	266997	438	108484	0	508033	768475	11_Fabids
201	Arachis ipaensis	0	25886	561487	0	9721	0	0	0	3870	133519	0	51328	0	211346	406873	11_Fabids
202	Arachis monticola	0	44677	914572	3266	17975	0	0	13014	8911	276940	1080	114601	0	534239	722088	11_Fabids
203	Lupinus angustifolius	0	30677	201391	0	13334	0	0	0	4319	116949	661	21067	725	103578	466895	11_Fabids
204	Cicer arietinum	0	19752	168983	0	455	0	249	428	1698	96511	386	28370	7913	133025	296006	11_Fabids
205	Cicer echinospermum	0	21354	209315	173	956	0	335	771	5674	132554	156	35247	13455	167341	278797	11_Fabids
206	Cicer reticulatum	0	23072	133884	0	708	0	0	0	1020	104348	78	25983	1829	114564	261704	11_Fabids
207	Vicia faba	55	2013	7433	44	307	0	59	38	507	5282	23	3645	29	16417	23244	11_Fabids
208	Medicago truncatula	1743	47801	108458	0	17909	0	0	1048	14815	183102	495	22710	1439	109419	219046	11_Fabids
209	Trifolium subterraneum	124	31449	140409	199	13160	0	0	358	22974	151228	100	22673	420	107236	340506	11_Fabids
210	Lotus japonicus	0	30019	107451	0	6023	0	0	0	5660	93757	0	20831	1481	90547	227178	11_Fabids
211	Abrus precatorius	0	11123	64694	0	591	0	0	306	1989	32092	990	30127	133	117476	163321	11_Fabids
212	Cajanus cajan	1956	14939	223940	5559	1244	0	1437	0	5244	102941	107	37020	4474	183524	531561	11_Fabids
213	Glycine max	0	25143	254288	206	9422	0	582	0	3510	134444	254	56537	8113	256920	305457	11_Fabids
214	Glycine soja	970	22966	404238	0	4857	196	4543	0	3317	141710	296	58332	4653	262073	437544	11_Fabids
215	Mucuna pruriens	0	9286	96423	953	1416	0	842	0	330	42034	0	34987	1045	130578	309110	11_Fabids
216	Phaseolus vulgaris	414	21262	150563	0	189	0	0	0	3387	39073	0	30439	733	120664	265064	11_Fabids
217	Spatholobus suberectus	0	26880	201273	1078	9849	0	310	0	7710	282724	627	50444	0	241084	628738	11_Fabids
218	Vigna angularis	0	5258	154115	295	638	0	0	286	1213	53246	360	32870	524	133187	369037	11_Fabids
219	Vigna radiata	0	2948	148640	0	283	0	0	0	899	44433	291	32879	387	140806	286607	11_Fabids
220	Vigna unguiculata	0	4702	148010	0	733	0	0	734	5924	106741	408	34166	540	169597	263902	11_Fabids
221	Quillaja saponaria	72	11297	24099	0	357	0	0	65	897	4786	150	18277	787	80849	176944	11_Fabids
222	Cannabis sativa	364	56603	334439	0	1254	0	494	771	875	78813	0	42666	330	234350	393369	11_Fabids
223	Humulus lupulus	0	47136	976612	850	1701	0	0	4199	7265	178830	0	56230	0	281626	1097235	11_Fabids
224	Parasponia andersonii	0	5821	106208	0	132	0	0	1072	2645	46183	0	28405	712	163100	227917	11_Fabids
225	Trema orientale	0	6113	79507	0	118	153	11	1263	3023	70129	0	30939	278	165386	257512	11_Fabids
226	Artocarpus camansi	0	10481	331974	1112	558	0	0	0	778	84343	596	52557	819	265876	461421	11_Fabids
227	Ficus carica	0	1660	35828	45	371	0	0	546	1692	38800	137	31992	297	203918	211086	11_Fabids
228	Ficus erecta	765	21678	125866	0	7351	0	1700	0	9713	179506	3102	78023	410	504867	347300	11_Fabids
229	Morus notabilis	0	5431	126308	394	446	0	906	52	4547	55640	274	28309	15	169625	238928	11_Fabids
230	Ochetophila trinervis	0	9679	66424	1171	0	0	0	275	2810	61982	69	28488	49	134575	194061	11_Fabids
231	Ziziphus jujuba	0	8841	110196	2722	1008	76	682	1334	7151	56299	1079	50648	365	303211	160265	11_Fabids
232	Prunus avium	167	8678	76331	416	6461	122	0	57	3758	70969	157	15214	0	77654	153771	11_Fabids
233	Prunus dulcis	0	3708	51268	0	5722	121	0	0	1268	56303	182	13969	188	81405	65329	11_Fabids
234	Prunus mume	0	4221	52576	0	5864	0	86	101	2180	63526	98	14549	38	80869	120644	11_Fabids
235	Prunus persica	0	5171	45526	0	3574	0	215	0	2090	55441	570	13854	952	76093	92002	11_Fabids
236	Prunus yedoensis	0	11019	74956	245	9471	34	170	371	5050	97009	758	18426	753	96360	155099	11_Fabids
237	Malus baccata	105	29028	302364	0	27260	1006	0	0	11468	266486	480	27907	257	139425	163058	11_Fabids
238	Malus domestica	0	36113	333299	0	32214	1227	145	61	18248	314162	610	31536	384	157315	177087	11_Fabids
239	Pyrus betulifolia	0	16934	167765	945	23646	1107	0	0	10730	205596	585	24483	0	137642	121804	11_Fabids
240	Pyrus x bretschneideri	306	14534	180391	0	22784	887	0	0	10212	209841	812	23990	178	134664	124884	11_Fabids
241	Pyrus ussuriensis x Pyrus communis	0	17425	178421	0	27499	997	0	0	9650	185669	342	23692	38	134046	96014	11_Fabids
242	Dryas drummondii	0	4963	40530	0	2101	0	297	302	951	66537	270	15189	1898	89148	120506	11_Fabids
243	Purshia tridentata	0	5123	27654	0	504	0	179	158	2276	39153	103	12646	356	65040	79848	11_Fabids
244	Geum urbanum	0	44460	420098	787	1119	0	0	0	9810	294004	1264	27465	12705	180482	391682	11_Fabids
245	Fragaria nubicola	1333	12586	58883	0	4321	43	0	0	3207	79502	92	10174	857	58705	71952	11_Fabids
246	Fragaria orientalis	2800	15864	72301	34	4674	179	0	618	3610	93526	109	9954	1228	54879	99704	11_Fabids
247	Fragaria vesca	163	9507	28724	374	3645	149	829	0	1201	51887	113	10124	486	55269	50949	11_Fabids
248	Fragaria x ananassa	3961	43386	378088	0	15499	0	1313	0	3533	282662	161	26001	1045	144166	294269	11_Fabids
249	Rosa chinensis	106	29595	123299	0	4916	0	0	224	3773	114370	348	22350	1873	132672	200058	11_Fabids
250	Rosa lucieae	335	45686	423667	433	7298	0	0	206	8820	236369	3449	32148	5746	196420	416902	11_Fabids
251	Rosa x damascena	560	53511	320369	384	6974	0	0	0	6257	202536	135	29509	3339	165489	314603	11_Fabids
252	Boehmeria nivea	0	6488	59804	0	823	57	0	0	1934	38861	255	29065	170	168935	266240	11_Fabids
253	Begonia fuchsioides	0	17199	113293	0	187	0	0	0	1053	59078	1896	15887	1370	79989	175711	11_Fabids
254	Benincasa hispida	0	26613	469216	0	4169	0	0	3285	0	130802	465	37276	4201	173056	365980	11_Fabids
255	Citrullus lanatus	0	12558	113222	0	4665	0	1028	0	213	43006	334	30091	2353	147879	400264	11_Fabids
256	Cucumis melo	745	8779	88821	0	2323	0	0	334	1508	75124	794	26075	1384	118304	270643	11_Fabids
257	Cucumis sativus	0	12548	44971	151	2103	0	0	123	774	28457	347	22655	1220	89941	129666	11_Fabids
258	Lagenaria siceraria	0	17855	81962	0	6997	0	0	0	745	66370	654	25816	1503	141788	367273	11_Fabids
259	Cucurbita argyrosperma	0	5175	102950	0	10081	60	0	0	1227	15829	3705	22055	208	115775	107821	11_Fabids
260	Cucurbita moschata	0	6171	128055	0	20527	0	0	710	3636	18495	2292	21514	1022	116934	129575	11_Fabids
261	Momordica charantia	941	14577	36908	0	2127	0	0	0	203	8511	1090	19866	795	79468	295805	11_Fabids
262	Datisca glomerata	0	40160	238767	0	2765	0	348	433	9232	136063	4909	22560	4937	95754	456759	11_Fabids
263	Alnus glutinosa	563	52428	183086	0	5430	0	0	3347	2937	96600	364	42260	1700	249433	581072	11_Fabids
264	Betula nana	0	41327	133592	0	881	427	87	0	3400	104561	611	42449	121	228312	536343	11_Fabids
265	Betula pendula	530	39003	102437	257	338	220	0	211	2885	62944	482	33675	437	168000	428757	11_Fabids
266	Casuarina equisetifolia	0	11943	52170	290	383	0	0	333	4491	6768	1240	13432	136	60369	105125	11_Fabids
267	Casuarina glauca	52	13540	42972	0	137	0	0	34	4640	216	1006	13813	0	59118	158826	11_Fabids
268	Castanea mollissima	0	46867	214926	0	4936	0	0	1073	9440	145978	716	55289	1031	360684	589110	11_Fabids
269	Fagus sylvatica	104	26611	85604	407	6569	0	0	67	4525	62719	1216	35243	1357	214934	366426	11_Fabids
270	Quercus lobata	649	84172	215604	0	3546	0	19860	0	15896	209842	5059	94916	770	636360	1121278	11_Fabids
271	Quercus robur	6466	47893	160557	202	2665	0	7750	183	9294	145508	260	59441	1426	383866	706370	11_Fabids
272	Quercus suber	2462	60307	171989	1219	9848	0	3206	0	4861	146502	333	70691	3556	473869	810036	11_Fabids
273	Juglans cathayensis	0	54345	116611	0	3911	0	103	1926	3550	96888	0	28789	713	193670	542387	11_Fabids
274	Juglans hindsii	707	52978	124984	292	4688	0	509	0	4090	84957	816	29622	1010	214768	546423	11_Fabids
275	Juglans mandshurica	0	60301	105938	0	3461	0	0	618	3661	68011	0	29556	1712	191526	481085	11_Fabids
276	Juglans microcarpa	614	87393	191551	0	6122	0	0	803	3853	129582	1723	46610	233	318019	833043	11_Fabids
277	Juglans microcarpa x Juglans regia	0	51986	92309	0	4599	0	286	1120	3597	76912	0	27138	1564	192233	400681	11_Fabids
278	Juglans nigra	1199	56650	146001	737	6429	0	0	784	3069	80175	1453	30266	130	206531	564750	11_Fabids
279	Juglans regia	0	62582	145095	490	5001	0	0	1096	3564	100505	18097	36170	9180	257369	657269	11_Fabids
280	Juglans sigillata	0	63337	143964	0	4385	0	0	78	3334	88052	0	31692	1521	212148	580947	11_Fabids
281	Pterocarya stenoptera	0	103522	195237	0	7983	0	0	1211	14860	138376	2972	50458	2789	313984	849355	11_Fabids
282	Morella rubra	79	9931	50245	518	1938	0	393	309	3506	44528	312	14574	28	70877	189828	11_Fabids
283	Punica granatum	197	7631	54831	204	4902	181	340	0	2791	34913	220	13568	1345	93865	237110	12_Malvids
284	Eucalyptus grandis	0	21545	181100	0	5309	0	62	0	8135	185556	165	24501	1471	159254	273198	12_Malvids
285	Eucalyptus melliodora	14	17075	162032	0	3876	127	304	666	8287	181523	2483	26547	1516	172410	240948	12_Malvids
286	Eucalyptus pauciflora	0	12682	146262	0	7462	0	614	326	9755	187050	1047	23276	1178	134411	183491	12_Malvids
287	Gossypium darwinii	0	35443	1220147	0	0	0	0	0	8411	200539	1417	83722	1439	293417	539268	12_Malvids
288	Gossypium mustelinum	0	34843	1390392	0	0	0	0	0	2257	190114	570	84856	0	299208	582342	12_Malvids
289	Gossypium tomentosum	0	51756	1252885	0	1349	807	0	0	2140	160518	2646	86468	0	293735	544740	12_Malvids
290	Gossypium turneri	0	19151	361052	0	100	0	0	0	5708	96175	262	35205	0	146605	238953	12_Malvids
291	Metrosideros polymorpha	39	7184	72883	0	2235	119	0	216	2414	135129	1629	11119	545	71288	168748	12_Malvids
292	Rhodamnia argentea	77	9595	78381	0	2624	0	0	41	5397	138788	2158	15132	947	109955	155461	12_Malvids
293	Psidium guajava	0	12473	98206	0	2916	0	0	698	3127	115129	1156	12273	3251	70597	161041	12_Malvids
294	Syzygium oleosum	115	8596	100255	132	2818	0	0	0	3064	135328	571	13408	320	84887	133534	12_Malvids
295	Azadirachta indica	0	4765	59605	59	143	0	0	0	3988	34605	446	19849	54	108540	124971	12_Malvids
296	Atalantia buxifolia	0	12217	78036	492	786	0	583	1224	2628	54796	179	16396	26	92071	192136	12_Malvids
297	Citrus cavaleriei	0	9478	91579	0	1947	0	0	1023	3562	57351	44	19645	121	102273	190885	12_Malvids
298	Citrus clementina	0	7807	65825	124	586	0	315	1135	3342	49623	71	15241	305	85037	152478	12_Malvids
299	Citrus hindsii	0	8224	77662	112	1622	0	252	1551	4020	62385	511	20350	654	107044	166901	12_Malvids
300	Citrus maxima	0	7983	77762	1122	669	0	146	529	3371	48415	1452	17421	979	98255	154588	12_Malvids
301	Citrus medica	54	6828	110595	0	456	0	297	1235	3008	51449	105	19286	0	103502	152932	12_Malvids
302	Citrus reticulata	1470	8447	61135	0	11	0	0	0	4695	15430	162	18385	401	95353	300690	12_Malvids
303	Citrus sinensis	217	7735	99540	315	534	0	116	427	4056	54303	193	16134	650	84978	204105	12_Malvids
304	Citrus unshiu	0	10348	95710	0	813	253	0	1003	4470	47405	36	19092	1229	97188	203543	12_Malvids
305	Citrus x paradisi x Citrus trifoliata	284	11096	110966	52	545	0	0	100	3113	50092	28	15963	34	74380	184885	12_Malvids
306	Acer yangbiense	482	24644	209161	0	2823	0	0	1399	4170	137364	0	38668	0	260179	342931	12_Malvids
307	Xanthoceras sorbifolium	0	26883	144622	642	2524	0	0	1496	1687	82127	242	27448	744	170185	355789	12_Malvids
308	Herrania umbratica	0	3237	62362	441	0	0	0	0	570	23525	0	13648	0	52595	104420	12_Malvids
309	Corchorus capsularis	0	12095	75598	0	98	0	242	0	2332	52154	515	17385	658	83359	168108	12_Malvids
310	Corchorus olitorius	0	12311	79025	0	106	0	0	88	2897	39058	332	17688	602	81207	186621	12_Malvids
311	Durio zibethinus	0	20251	145037	0	333	0	0	1614	13503	50832	2752	50712	2535	195474	283470	12_Malvids
312	Gossypioides kirkii	519	19076	181877	0	389	0	0	152	2769	77761	728	28298	159	105380	297269	12_Malvids
313	Gossypium arboreum	0	16567	890650	0	776	0	0	0	0	79904	1151	49158	0	187263	479163	12_Malvids
314	Gossypium barbadense	0	42589	1491525	0	0	0	0	2073	1217	227310	2056	95167	0	336317	911280	12_Malvids
315	Gossypium hirsutum	0	37818	1199711	0	1784	0	2701	1460	1367	168308	1092	79429	0	275608	682440	12_Malvids
316	Gossypium raimondii	72	16634	366306	0	3715	0	406	804	1884	96259	834	35122	93	136791	323500	12_Malvids
317	Gossypium thurberi	0	16527	392928	0	1540	0	0	0	165	81983	420	28354	0	100305	346864	12_Malvids
318	Hibiscus syriacus	1420	58161	725032	0	13044	0	1137	1902	4410	254771	0	65915	12379	283947	1238567	12_Malvids
319	Kokia drynarioides	0	17510	206146	422	1550	0	158	0	1061	59054	104	28808	0	109235	296409	12_Malvids
320	Aquilaria agallochum	0	23304	219953	0	919	700	0	1419	3390	114692	343	19789	338	100522	363369	12_Malvids
321	Aquilaria sinensis	1178	19390	165052	437	1422	624	191	0	2181	99793	357	20521	0	103644	408162	12_Malvids
322	Aethionema arabicum	0	3150	38707	539	674	0	784	373	2185	37637	0	16165	175	69467	67692	12_Malvids
323	Arabis alpina	0	15839	63357	106	3599	298	77	261	13595	54924	275	11391	921	48552	112301	12_Malvids
324	Arabis nordmanniana	0	17576	91761	0	5551	271	88	392	5708	61153	0	20370	328	92489	99244	12_Malvids
325	Aurinia saxatilis	527	36295	147492	0	3561	545	94	136	8038	71067	148	12203	850	62682	175662	12_Malvids
326	Odontarrhena argentea	0	11099	27138	0	2948	243	284	320	4134	30572	80	12849	296	67299	82349	12_Malvids
327	Anastatica hierochuntica	0	38311	230617	496	8041	1025	812	0	11348	116013	474	19382	388	82018	171620	12_Malvids
328	Biscutella auriculata	0	22817	128664	2119	2333	1171	0	0	3548	143976	53	20269	141	82728	256508	12_Malvids
329	Biscutella laevigata	0	19783	118613	0	5091	164	0	0	4579	110609	0	16530	361	71012	258413	12_Malvids
330	Boechera puberula	0	9650	49707	128	1145	67	0	276	6468	42620	37	13010	121	61261	55784	12_Malvids
331	Boechera stricta	0	6152	32224	0	1081	0	114	70	4340	30685	55	10877	121	51189	47738	12_Malvids
332	Schrenkiella parvula	0	4155	16559	0	1200	78	185	43	2681	13974	29	10336	0	38800	19869	12_Malvids
333	Brassica cretica	0	30518	148421	0	8183	155	0	0	8566	115426	0	19644	3092	96085	206919	12_Malvids
334	Brassica juncea	971	30872	143403	306	14276	148	131	292	12232	147703	625	43330	1600	185924	294285	12_Malvids
335	Brassica napus	0	53480	185006	639	18156	419	0	4147	13727	212451	2143	44308	56	200054	343903	12_Malvids
336	Brassica nigra	0	14390	72108	0	4032	83	0	100	5552	71978	113	19972	3	89308	131325	12_Malvids
337	Brassica oleracea	0	33324	122027	0	7764	117	0	144	5663	112453	321	22126	1065	103903	234412	12_Malvids
338	Brassica rapa	66	18352	39851	0	6173	67	52	0	4137	61234	549	16081	877	70794	151496	12_Malvids
339	Erucastrum elatum	0	23732	50835	170	9132	753	0	0	14866	82695	125	22016	1005	97604	137868	12_Malvids
340	Raphanus raphanistrum	72	16990	37905	240	7173	239	0	0	4106	56545	61	16709	1605	71833	109582	12_Malvids
341	Raphanus sativus	0	22795	53019	0	7846	397	0	186	5777	86512	81	23552	1690	101817	168369	12_Malvids
342	Arabidopsis halleri	0	9044	23005	141	3105	560	0	0	17350	44064	86	11008	600	45167	37094	12_Malvids
343	Arabidopsis lyrata	0	7122	20224	0	2448	427	0	0	19634	34757	113	12069	254	54309	23977	12_Malvids
344	Arabidopsis thaliana	0	2245	7491	486	836	45	0	0	5431	10185	103	8574	660	34535	6910	12_Malvids
345	Camelina sativa	92	31651	116766	0	3030	382	0	122	48088	94953	0	40186	2629	203112	149306	12_Malvids
346	Capsella bursa-pastoris	155	9593	21868	0	2388	138	360	113	11370	30986	0	19339	3470	87255	38789	12_Malvids
347	Capsella rubella	27	3652	11463	0	1255	45	0	0	6663	15565	53	10639	1737	50256	17804	12_Malvids
348	Barbarea vulgaris	0	6521	26006	0	1588	53	46	53	5525	22190	0	12821	179	57946	35710	12_Malvids
349	Leavenworthia alabamica	225	6237	27232	0	2430	49	0	40	2617	30138	24	11782	322	48344	31618	12_Malvids
350	Nasturtium officinale	0	5610	32180	0	717	0	0	0	979	24526	247	15147	0	77339	28262	12_Malvids
351	Noccaea caerulescens	403	3297	26269	0	1056	0	0	0	3554	18892	31	9941	0	48333	24748	12_Malvids
352	Noccaea goesingensis	0	8828	25268	32	2586	542	43	80	4330	23145	67	10996	335	48337	58070	12_Malvids
353	Raparia bulbosa	0	5045	24198	0	1731	364	0	0	3053	19890	50	11278	116	59399	31034	12_Malvids
354	Conringia planisiliqua	0	3640	30902	0	1770	0	146	72	2201	16006	542	11171	80	48721	38575	12_Malvids
355	Cochlearia officinalis	0	5492	25797	243	2371	143	0	79	7366	78833	333	12892	1230	61194	104482	12_Malvids
356	Crucihimalaya himalaica	0	9400	49844	0	1217	64	0	390	8045	51525	48	10900	364	52009	58046	12_Malvids
357	Erysimum cheiri	0	6814	17863	0	2728	261	0	26	7022	20503	50	12290	401	55088	25817	12_Malvids
358	Erysimum pusillum	0	5976	16409	0	1757	41	324	0	6103	18037	84	15411	160	65058	22313	12_Malvids
359	Euclidium syriacum	0	10024	44910	0	2502	0	47	0	6782	29299	437	12001	375	48743	63526	12_Malvids
360	Eutrema heterophyllum	431	18443	118336	0	4176	559	0	0	13113	90823	136	16850	920	74184	145329	12_Malvids
361	Eutrema salsugineum	0	6174	43860	0	1174	0	353	0	4887	24258	47	11454	404	50335	47026	12_Malvids
362	Eutrema yunnanense	0	15289	169282	371	5812	311	229	0	14964	98383	839	15631	273	70711	118179	12_Malvids
363	Iberis amara	241	45744	107237	300	6810	256	0	170	9904	132362	0	20550	138	98108	225843	12_Malvids
364	Iberis pinnata	0	62718	289345	0	10024	671	0	0	7576	215508	0	26043	1840	127768	266128	12_Malvids
365	Isatis lusitanica	0	6829	36724	0	1135	225	99	0	5469	23727	0	13323	0	52535	45994	12_Malvids
366	Isatis tinctoria	0	14751	52447	0	2969	396	0	0	8267	44333	0	16169	54	68791	86547	12_Malvids
367	Kernera saxatilis	0	4826	13686	0	852	296	75	0	1891	16997	143	11846	1	51516	18796	12_Malvids
368	Lepidium africanum	0	14697	49233	0	766	0	0	0	10202	47858	0	11653	0	51728	62491	12_Malvids
369	Lepidium aucheri	0	18005	101362	0	1020	0	0	0	18231	70349	0	13520	52	58181	106745	12_Malvids
370	Sisymbrium altissimum	0	6092	28380	0	1009	71	0	0	2638	21632	0	13099	0	54455	28256	12_Malvids
371	Sisymbrium irio	0	7799	56089	0	813	32	0	0	3452	27963	0	12312	212	48133	99264	12_Malvids
372	Macropodium nivale	0	13393	95632	0	1438	940	0	0	4976	46756	167	16731	253	81393	81948	12_Malvids
373	Pseudoturritis turrita	0	16213	78984	0	3955	808	556	0	4321	64509	716	16106	0	71453	74819	12_Malvids
374	Turritis glabra	0	5582	26054	0	675	84	0	0	5972	23013	0	11095	99	51763	12576	12_Malvids
375	Thlaspi arvense	190	5832	120352	0	654	83	152	0	7397	26322	134	12048	877	51233	88362	12_Malvids
376	Carica papaya	0	15513	100420	326	163	0	0	277	112	19127	578	16717	3947	103682	72364	12_Malvids
377	Tarenaya hassleriana	0	5423	78438	0	1938	0	0	0	445	38701	358	12068	252	94163	68624	12_Malvids
378	Santalum album	107	9409	22907	0	1623	0	0	0	691	22229	1117	14864	0	82805	130885	13_Super_asterids
379	Amaranthus hypochondriacus	0	32995	40411	40	3457	0	33	0	1187	39935	0	12691	197	54168	266750	13_Super_asterids
380	Carnegiea gigantea	0	45224	328662	0	9324	684	754	1574	5066	151589	260	27845	837	180617	350724	13_Super_asterids
381	Lophocereus schottii	6010	45472	317226	0	10360	0	0	0	12093	114662	0	22977	1744	118069	381084	13_Super_asterids
382	Pachycereus pringlei	0	38646	230931	0	6136	0	0	1014	2880	97501	107	17987	3264	84509	318333	13_Super_asterids
383	Stenocereus thurberi	544	73131	309828	0	5722	0	0	1998	11037	126435	114	24421	801	130341	386048	13_Super_asterids
384	Pereskia humboldtii	247	30309	63720	0	684	0	0	0	2449	13571	0	18691	2767	86147	472465	13_Super_asterids
385	Dianthus caryophyllus	401	22244	137520	0	4939	485	0	1531	7432	85497	0	26167	693	172600	498287	13_Super_asterids
386	Silene latifolia	0	67244	204222	0	23321	0	268	735	5058	107288	0	34609	5059	173042	746385	13_Super_asterids
387	Beta vulgaris	1136	37888	113774	2562	5481	0	677	110	3029	123576	597	20985	1269	117385	472052	13_Super_asterids
388	Beta patula	761	37847	153351	124	4809	0	0	1119	4217	102138	90	20703	801	95084	593240	13_Super_asterids
389	Bassia scoparia	240	36371	153733	545	513	0	0	862	5252	107213	484	29769	5712	156658	342049	13_Super_asterids
390	Spinacia oleracea	0	25223	245638	0	3290	0	1100	1916	4773	141003	649	21651	1604	125226	511904	13_Super_asterids
391	Chenopodium pallidicaule	0	10374	68756	167	968	0	0	495	67	62761	948	16365	1709	84258	179185	13_Super_asterids
392	Chenopodium quinoa	0	32490	288792	202	2792	0	443	0	1431	194542	1048	55957	10292	321606	630850	13_Super_asterids
393	Chenopodium suecicum	773	24132	144002	302	475	0	315	5857	756	87188	381	24557	4440	154428	310756	13_Super_asterids
394	Drosera capensis	479	7098	55704	0	1861	0	0	0	788	13701	330	11782	3245	57132	147627	13_Super_asterids
395	Fagopyrum esculentum	0	38890	384246	3563	6674	1736	209	0	11575	93901	5204	18237	268	86123	356535	13_Super_asterids
396	Fagopyrum tataricum	0	30443	117078	0	905	0	0	197	2058	61608	4504	15740	339	90407	258527	13_Super_asterids
397	Nyssa sinensis	0	118190	281258	0	9940	0	645	12312	3414	304431	374	46308	13095	358385	440786	13_Super_asterids
398	Actinidia chinensis	445	12630	122782	0	14108	361	183	321	1995	128714	337	30167	399	163533	504139	13_Super_asterids
399	Actinidia eriantha	290	17787	150659	0	13666	0	0	436	5024	147604	448	38867	0	200509	599557	13_Super_asterids
400	Monotropa hypopitys	0	67886	1634075	0	10305	0	0	0	17323	260273	0	30432	5284	148541	2425514	13_Super_asterids
401	Vaccinium macrocarpon	0	25633	97127	95	16477	0	298	0	4236	107968	0	17143	6297	107614	523764	13_Super_asterids
402	Embelia ribes	0	20955	193842	2209	9081	0	0	0	2905	136741	1898	31502	743	181773	528384	13_Super_asterids
403	Primula veris	0	9463	35179	165	1819	0	1210	0	218	51968	89	12232	965	66156	246894	13_Super_asterids
404	Argania spinosa	0	40165	149309	1564	10660	0	284	2371	4466	71779	945	55186	249	314700	621369	13_Super_asterids
405	Camellia sinensis	0	74918	958797	0	11035	274	6018	4795	36477	357360	1078	140162	37754	760169	2570383	13_Super_asterids
406	Andrographis paniculata	0	1188	53715	0	7714	0	0	976	611	45254	402	21401	442	156149	276251	14_Lamiids
407	Handroanthus impetiginosus	0	8611	87505	0	633	0	0	168	7904	75343	731	33364	525	176036	480180	14_Lamiids
408	Dorcoceras hygrometricum	0	4021	1077687	0	0	0	0	0	35877	55814	167	7831	5086	58995	694206	14_Lamiids
409	Pogostemon cablin	0	43695	449891	896	178	0	32228	896	47155	275950	2055	86189	0	438623	1619735	14_Lamiids
410	Scutellaria baicalensis	0	2057	59744	2390	89	0	0	74	8767	106647	281	17311	170	120471	298173	14_Lamiids
411	Perilla citriodora	0	9541	158324	0	13954	0	0	1697	3496	129085	0	27126	1393	207671	525946	14_Lamiids
412	Salvia splendens	49	14945	144590	152	1150	0	139	0	9222	212812	875	26759	3632	146086	486105	14_Lamiids
413	Genlisea aurea	0	363	632	0	19	0	24	0	111	3075	0	3296	2	29566	20622	14_Lamiids
414	Utricularia gibba	0	223	15206	25	0	0	38	0	93	3226	308	3519	0	18984	22569	14_Lamiids
415	Lindernia brevidens	38	7082	59819	70	1401	0	0	0	916	38806	271	7653	6204	65381	117852	14_Lamiids
416	Olea europaea	0	26482	660690	0	5655	0	0	2507	6852	110621	3262	35051	10164	189560	674473	14_Lamiids
417	Striga asiatica	274	13075	114308	0	547	0	0	0	9785	85180	134	21653	221	122142	251454	14_Lamiids
418	Sesamum indicum	462	14499	47537	740	491	0	0	0	918	40275	937	12303	0	75787	241716	14_Lamiids
419	Penstemon barbatus	0	12718	154009	5746	3598	0	0	138	4016	132926	2328	23879	177	155362	472474	14_Lamiids
420	Cuscuta australis	450	24257	71542	714	630	0	2	0	6314	95625	593	7798	290	57927	257850	14_Lamiids
421	Cuscuta campestris	0	42670	113676	3403	2276	0	0	874	15382	172499	920	16200	3886	113020	513449	14_Lamiids
422	Ipomoea batatas	0	41094	157551	0	46111	0	108	0	13262	217386	167	43563	0	305642	984804	14_Lamiids
423	Ipomoea nil	3442	35536	203693	0	41587	0	865	0	12677	220192	4201	29536	2205	309265	607340	14_Lamiids
424	Ipomoea trifida	312	14047	95704	0	26318	0	0	305	11213	125419	912	23903	880	191252	494349	14_Lamiids
425	Ipomoea triloba	1033	15460	107812	160	25310	0	1674	74	10039	126806	928	22938	743	179585	426577	14_Lamiids
426	Nicotiana attenuata	0	66383	932379	1948	35130	0	0	0	36372	320810	2292	35537	4542	196526	342283	14_Lamiids
427	Nicotiana glauca	0	92859	2155600	0	34949	0	0	0	39313	372692	0	50653	3032	237090	443093	14_Lamiids
428	Nicotiana knightiana	0	54865	1186225	0	26353	703	2007	0	38149	334456	1630	31893	53296	227385	521809	14_Lamiids
429	Nicotiana obtusifolia	0	57240	557205	1545	25367	351	463	0	27101	213692	3681	24502	3705	135289	252051	14_Lamiids
430	Nicotiana paniculata	0	63966	1117202	0	27684	1055	0	0	32112	305364	1174	29628	12113	187441	500452	14_Lamiids
431	Nicotiana tabacum	0	114846	1921380	2700	64037	0	0	0	61221	510107	1952	62974	7020	298452	840094	14_Lamiids
432	Nicotiana undulata	2307	65817	971341	357	29427	0	1405	0	23959	276125	0	26076	3170	165188	416890	14_Lamiids
433	Capsicum annuum	0	105463	1274398	0	57184	0	3672	0	8837	498026	2589	59147	528	291293	428478	14_Lamiids
434	Capsicum baccatum	0	123759	1494311	0	67856	7413	0	0	16509	487390	15739	61750	14094	315611	1110936	14_Lamiids
435	Capsicum chinense	675	117856	1446094	0	62529	1228	0	1303	12941	612413	2114	65316	24844	311560	1279878	14_Lamiids
436	Jaltomata sinuosa	945	60553	560476	0	33380	266	0	0	6303	295490	2044	30272	1498	132777	396037	14_Lamiids
437	Solanum arcanum	0	33597	319250	0	13594	9172	0	177	4361	173538	1532	24550	1819	114157	173076	14_Lamiids
438	Solanum chilense	0	39061	374687	0	12568	4862	0	0	1358	194302	636	25929	121	110390	119808	14_Lamiids
439	Solanum habrochaites	0	33647	347176	0	12823	9578	0	255	3182	188047	1074	25735	0	114158	167416	14_Lamiids
440	Solanum lycopersicum	0	33403	311654	0	12158	8759	0	0	632	182717	824	25079	54	118620	147784	14_Lamiids
441	Solanum pennellii	0	37616	376553	0	16033	8334	0	0	3383	203558	1156	26174	1209	128095	160665	14_Lamiids
442	Solanum melongena	0	76841	525680	0	17908	2514	0	0	5133	156482	1302	22312	2433	105214	366899	14_Lamiids
443	Asclepias syriaca	0	9381	159977	1312	870	0	0	237	1823	7596	2252	9125	219	42882	197292	14_Lamiids
444	Calotropis procera	0	3903	36641	0	0	0	0	0	238	5510	26	12952	0	83910	59785	14_Lamiids
445	Rhazya stricta	0	4134	87600	29	477	0	0	472	1034	19926	594	11949	0	51847	151977	14_Lamiids
446	Catharanthus roseus	237	20681	181446	0	1395	0	2883	2044	1230	85016	994	22567	806	125733	486149	14_Lamiids
447	Coffea arabica	200	22841	346336	0	3938	0	1184	649	5742	104724	0	35925	527	185364	620962	14_Lamiids
448	Coffea canephora	0	12485	150281	0	1575	0	0	863	3351	51578	0	17823	357	94065	312471	14_Lamiids
449	Coffea eugenioides	705	11898	216318	8	2587	0	0	0	8252	65738	535	21575	100	110066	383111	14_Lamiids
450	Echium plantagineum	0	14173	43030	0	30267	0	220	757	849	101104	958	11292	3991	62798	291161	14_Lamiids
451	Mikania micrantha	1180	74219	566893	0	10800	0	2887	3343	11448	371741	421	45345	7325	291806	805461	15_Campanulids
452	Artemisia annua	0	72943	573122	5002	3184	0	0	0	24481	224924	0	50353	1600	360111	1067288	15_Campanulids
453	Erigeron canadensis	0	21235	33971	0	7868	0	0	0	9217	40857	97	16149	54	110055	371910	15_Campanulids
454	Helianthus annuus	769	70860	882635	4782	4080	0	3642	0	20462	335278	2116	58137	13978	437006	1891810	15_Campanulids
455	Cynara cardunculus var. scolymus	5943	33940	175506	3035	7580	0	1110	4328	9784	166215	2967	16176	2153	159581	669317	15_Campanulids
456	Lactuca sativa	0	26497	956520	0	14052	0	6860	784	3724	203350	0	45605	47029	341206	1523671	15_Campanulids
457	Codonopsis pilosula	645	57970	222215	0	7495	0	1128	869	21343	266449	347	28006	191	207599	831165	15_Campanulids
458	Platycodon grandiflorus	0	36487	180032	2970	5190	0	0	181	8242	233508	229	29097	99	223286	471067	15_Campanulids
459	Daucus carota	0	6286	55778	366	1492	0	0	297	1453	92904	789	15020	256	79664	252042	15_Campanulids

## Sheet: 2e number_percentage
Supplementary Table 2e The percentage of repeat number in total repeat number
Calculation method: The actual number of each repeat sequence was list in Supplementary Table 2d, number percentage = the number of repeat / whole repeat number
NO	Species name	DIRS	LINE	LTR	PLE	SINE	unknown	Circular_dsDNA	DNA_Polymerase	Rolling_Circle	TIR	RNA	Low_complexity	Satellite	Simple_repeat	Unknown	Total	species_type
1	Chloropicon primus	0	0	0.11	0	0	0	0	0	0	2.53	0	11.6	0	80.53	5.23	100	01_Alage
2	Edaphochlamys debaryana	0.07	2.64	0.78	0.03	0.07	0	0	0	0.67	0.5	0	14.2	0	61.56	19.5	100	01_Alage
3	Bathycoccus prasinos	0	0	0.91	0.11	0	0	0	0.56	0	4.04	0	12.07	0	79.1	3.2	100	01_Alage
4	Ostreococcus tauri	0	0.17	0	0	0	0	0	0	0.13	0.97	0	2.54	0.13	85.54	10.52	100	01_Alage
5	Micromonas	0.36	0.19	0.49	0.12	0	0	0.85	0	0.24	3.29	0	1.55	0	81.18	11.74	100	01_Alage
6	Micromonas commoda	0	0	0.52	0	0	0	0	0	0.08	0	0	2.03	0	27.67	69.7	100	01_Alage
7	Micromonas pusilla	0	0	0.14	0	0	0	0	0.29	0	0.77	0	5.72	0	83.74	9.33	100	01_Alage
8	Bathycoccus	0	0	0.08	0	0	0	0.07	0	0	0.25	0	2.52	0	77.49	19.59	100	01_Alage
9	unclassified Mamiellophyceae	0.16	0.74	0.61	0.18	0.46	0	0.28	0.84	0	7.52	0	8.09	0.11	78.67	2.34	100	01_Alage
10	Cymbomonas tetramitiformis	0	0	0	0	0	0	0	0	0	0	0	7.01	0	69.36	23.63	100	01_Alage
11	Chlamydomonas	1.16	2.59	4.41	0.15	0.22	0	0.17	0.04	0.12	3.63	0	1.23	0.06	14.52	71.7	100	01_Alage
12	Chlamydomonas applanata	0	0.38	0.03	0	0.06	0	0	0	0.16	0.52	0	16.08	0	65.14	17.64	100	01_Alage
13	Chlamydomonas applanata	0.03	7.7	2.09	0	0	0	0.08	0	0	0.67	0	6.52	0	65.46	17.45	100	01_Alage
14	Chlamydomonas asymmetrica	0.02	5.76	1.15	0.08	0	0	0	0	0.04	2.93	0	2.66	0.11	54.55	32.69	100	01_Alage
15	Chlamydomonas debaryana	0.03	2.65	0.95	0	0.12	0	0	0	0.74	0.5	0	14.17	0	61.42	19.42	100	01_Alage
16	Chlamydomonas eustigma	0	5.2	7.32	0	0	0	0	0.11	1.28	0.1	0	3.04	0	44.62	38.33	100	01_Alage
17	Chlamydomonas reinhardtii	0.02	8.97	0.66	0.04	0.19	0	0	0.42	0.96	7.31	0.08	5.58	0.15	56.15	19.48	100	01_Alage
18	Chlamydomonas sphaeroides	0.11	3.32	0.74	0.06	0.01	0	0	0	0.03	0.22	0	9.19	0	64.63	21.7	100	01_Alage
19	Chloromonas	0.08	4.59	0.57	0	0.04	0	0.15	0.62	0	2.51	0.07	1.85	0.21	27.75	61.56	100	01_Alage
20	Eudorina	0.15	6.99	2.06	0.34	1.02	0	0	0.04	0.8	6.4	0.33	4.53	0.34	45.81	31.19	100	01_Alage
21	Gonium pectorale	0.2	4.25	1.32	0.07	0.15	0	0	0	0.17	1.21	0	8.12	0	53.86	30.65	100	01_Alage
22	Volvox carteri	0.71	8.8	5.11	0.08	0.52	0	0.21	0.13	1.12	6.86	0.27	4.15	0.43	52.53	19.09	100	01_Alage
23	Yamagishiella unicocca	0.21	7.14	5.13	0.05	0.5	0	0	0	0.11	2.56	0.7	5.16	0.1	42.96	35.38	100	01_Alage
24	Haematococcus	0	10.27	2.03	1.14	0.07	0	1.33	0	0	1.06	0	5.68	0.06	59.61	18.75	100	01_Alage
25	Haematococcus lacustris	0.11	10.1	5.35	0.05	0.03	0	0.54	0.19	0.88	2.8	0	4.3	0.1	36.82	38.72	100	01_Alage
26	Characiochloris	0.11	3.4	0.58	0.26	0.02	0	0	0.41	0	2.58	0.06	1.74	0.08	28.45	62.32	100	01_Alage
27	Dunaliella	0	3.86	0.9	0	0	0	0	0	0	17.96	0	2.45	0	62.04	12.8	100	01_Alage
28	Dunaliella salina	0.03	19.83	2.42	0.18	0.01	0	0.02	0	0.08	3.36	0.17	0.71	0.08	22.93	50.17	100	01_Alage
29	Tetrabaena socialis	0	3.97	0.72	0.02	0	0	0	0	0.32	3.27	0	6.26	0.07	46.74	38.62	100	01_Alage
30	Mychonastes homosphaera	0	0	0.33	0	0	0	0	0	0	0.28	0	7.18	0	91.36	0.86	100	01_Alage
31	Messastrum gracile	0	0.5	0.1	0	0	0	0	0	0	1.4	0	11.39	0.02	83.27	3.32	100	01_Alage
32	Monoraphidium	0	39.05	8.96	0.05	0.2	0	0.26	0.05	0	1.1	0	0.55	0	27.49	22.3	100	01_Alage
33	Monoraphidium neglectum	0	3.57	0.05	0	0	0	0	0	0	11.08	0	4.37	0	77.06	3.87	100	01_Alage
34	Raphidocelis subcapitata	0.01	1.05	0.17	0	0	0	0	0	0	0.11	0	8.92	0	85.38	4.34	100	01_Alage
35	Desmodesmus armatus	0.05	20.05	1.2	0.19	0.27	0	0.33	0.14	0.01	1.64	0.06	4.2	0.23	59.63	12	100	01_Alage
36	Scenedesmus	0.02	30.72	6.15	0	0.01	0	0.04	0	0.01	0.9	0	0.52	0.01	55.01	6.61	100	01_Alage
37	Scenedesmus quadricauda	0	1.45	0.09	0	0.25	0	0	0	0	5.43	0.1	3.17	0	82.89	6.61	100	01_Alage
38	Scenedesmus vacuolatus	0	38.62	6.37	0	0	0	0	0	0	0	0	0.67	0	45.11	9.23	100	01_Alage
39	Coelastrella	0	33.67	2.54	0	0.11	0	0	0	0	0.39	0	0.55	0	35.61	27.14	100	01_Alage
40	Tetradesmus obliquus	0.04	35.58	0.99	0	0	0	0.02	0.01	0.09	0.95	0	0.52	0	54.91	6.88	100	01_Alage
41	Tetraselmis striata	2.51	7.26	3.63	0.01	0.06	0	0.03	0.03	1.4	4.97	0.02	2.55	0.05	34	43.49	100	01_Alage
42	Picocystis	0.25	1.65	20.2	0	0.32	0	0.59	0.12	0	8.76	0.51	6.88	0	31.53	29.19	100	01_Alage
43	Ulva mutabilis	0.1	13.05	11.37	0.46	0.05	0	0	0	0.15	0.88	0	0.95	0	23.59	49.4	100	01_Alage
44	Ulva prolifera	0.07	3.81	4.99	0.05	0.16	0	0	0	0.12	4.41	0.27	1.37	0.04	29.54	55.17	100	01_Alage
45	Parachlorella kessleri	0	3.99	0.19	0	0	0	0.09	0	0.05	0.23	0	4.36	0	60.39	30.71	100	01_Alage
46	Helicosporidium	0	0	0	0	0	0	0	0	0	0	0	11.06	0.35	64.11	24.48	100	01_Alage
47	Auxenochlorella pyrenoidosa	0	0.37	0.12	0	0	0	0	0	0	0.1	0	9.55	0	85.72	4.14	100	01_Alage
48	Auxenochlorella protothecoides	0	0.15	0	0	0	0	0	0	0	0.96	0.17	14.04	0	76.42	8.27	100	01_Alage
49	Micractinium conductrix	0.04	6.65	1.14	0	0.14	0	0	0	0.41	1.78	0	7.03	0	77.82	4.99	100	01_Alage
50	Chlorella sorokiniana	0	2.57	4.03	0	0.15	0	0	0	0	1.58	0	4.01	0	83.02	4.64	100	01_Alage
51	Chlorella variabilis	0	1.84	0.8	0	0	0	0	0	0.12	0.65	0	6.62	0	84.64	5.33	100	01_Alage
52	Chlorella vulgaris	0	2.83	0.13	0	0	0	0	0	0	0.46	0	5.18	0	87.32	4.08	100	01_Alage
53	Prototheca bovis	0	0	0	0	0	0	0	0	0	1.11	0	16.1	0.17	78.97	3.65	100	01_Alage
54	Prototheca ciferrii	0	0	0	0	0.42	0	0	0	0	0.84	0	14.04	0	81.13	3.58	100	01_Alage
55	Prototheca cutis	0	0.83	0.11	0	0	0	0	0	0	0.29	0	5.01	0	83.18	10.58	100	01_Alage
56	Prototheca stagnorum	0	0	0	0	0	0	0.24	0	0	0	0	14.81	0	75.84	9.1	100	01_Alage
57	Prototheca wickerhamii	0	0.1	2.17	0	0.26	0	0	0	0	0	0	6.89	0	80.28	10.29	100	01_Alage
58	Prototheca zopfii	0	0	0.29	0	0.08	0	0.09	0	0	0.6	0	15.84	0.12	77.65	5.33	100	01_Alage
59	Chloroidium	0	0.36	0	0	0	0	0	0	0	0	0	9.89	0	80.31	9.43	100	01_Alage
60	Chlorella	0	0.39	0.05	0	0	0	0	0	0	0.13	0	11.58	0	85.01	2.85	100	01_Alage
61	Picochlorum	0	0.76	0	0	0	0	0	0	0	0.62	0	9.7	0	74.23	14.69	100	01_Alage
62	Botryococcus braunii	0.11	3.24	6.4	0.05	0	0	0.06	0	0.09	26.88	0.04	4.01	1.51	44.49	13.1	100	01_Alage
63	Coccomyxa	0	7.78	0.8	0	0	0	0	0	0	0.3	0	3.51	0	56.47	31.14	100	01_Alage
64	Coccomyxa subellipsoidea C-169	0	5.5	0.2	0	0	0	0	0	0	2.39	0.14	2.08	0	37.89	51.8	100	01_Alage
65	unclassified Trebouxiophyceae	1.52	2.71	1.13	0	0	0	0.06	0	0	1.88	0	5.23	0.06	71.89	15.53	100	01_Alage
66	Trebouxia	0	11.17	6.21	0	0	0	0	0	0.53	0.45	0.08	1.77	0	32.86	46.93	100	01_Alage
67	Trebouxia gelatinosa	0.41	7.8	3.23	0	0	0	0	0	0.61	2.08	0	1.73	0	52.56	31.57	100	01_Alage
68	Chlorokybus atmophyticus	1.09	3.09	9.11	0	0.15	0	0.25	0	0	23.54	0	2.2	0.18	44.63	15.76	100	01_Alage
69	Mesostigma viride	0.33	8.43	0.55	0.14	0	0	0	0.09	0.03	1.67	0	2.26	0	25.89	60.63	100	01_Alage
70	Klebsormidium nitens	0.25	1.71	3.9	0	0	0	0	0	0	1.51	0.39	4.44	0	31.76	56.04	100	01_Alage
71	Chara braunii	0.25	3.03	7.23	0.14	0.72	0	0.27	0.08	0.62	7.99	2.48	2.37	1.07	22.18	51.58	100	01_Alage
72	Mesotaenium endlicherianum	0.55	0.88	10.37	0.02	0.02	0	0	0.05	0.06	10.75	0	8.08	0.08	53.92	15.22	100	01_Alage
73	Physcomitrella patens	0	2.23	34.81	0	0.02	0	0	0	1.46	3.48	0.06	5.93	0.07	41.54	10.41	100	02_Bryophyte
74	Pleurozium schreberi	0.12	0.75	1.69	0.02	0.03	0	0	0.11	0.24	6.07	0.03	1.1	0.09	6.81	82.93	100	02_Bryophyte
75	Marchantia inflexa	0	1.49	19.45	0.07	0.08	0	0	0.15	1.16	6.65	0	1.57	0.02	8.4	60.96	100	02_Bryophyte
76	Marchantia polymorpha	0.1	2.28	15.42	0.08	0.26	0	0.1	0	0.66	5.26	0.22	5.04	0	33.22	37.37	100	02_Bryophyte
77	Selaginella kraussiana	0.02	10.08	11.25	0.2	1.19	0	0	0.05	1	4.08	0.37	2.19	0	12.94	56.62	100	03_Lycophytes
78	Selaginella moellendorffii	0	1.67	35.44	0.22	1.06	0	0.04	0.21	3.99	8.38	0.53	3.05	0.08	20.09	25.23	100	03_Lycophytes
79	Selaginella tamariscina	0.05	3.69	13.01	0.58	1.36	0	0.16	0.2	0.17	29.4	0.16	2.31	0.02	29.48	19.4	100	03_Lycophytes
80	Adiantum capillus-veneris	0	4.28	29.34	0.41	0.09	0	0.02	0.04	0.17	8.33	0	0.75	0.11	17.55	38.93	100	04_Fern
81	Azolla filliculoides	0	9.9	26.7	0.14	1.79	0	0	0.11	1.17	5.78	0.64	1.68	0.53	23.4	28.15	100	04_Fern
82	Salvinia cucullata	0	6.6	18.93	0	3.04	0	0	0.02	1.34	5.27	1.06	1.68	0.27	16.65	45.15	100	04_Fern
83	Gnetum montanum	0	5.19	30.05	0.22	0.84	0	0	0.6	0.25	2.18	0.04	1.06	0.65	4.82	54.11	100	05_Gymnosperms
84	Sequoiadendron giganteum	0	3.71	33.92	0.31	0.06	0.07	0.32	0.07	0.19	9.32	0.01	2.06	0.43	9.82	39.71	100	05_Gymnosperms
85	Amborella trichopoda	0	6.02	23.5	0	0.39	0	0	0.05	0.16	41.55	0.12	3.09	0.02	16.01	9.09	100	06_ANA
86	Nymphaea colorata	0.14	2.71	12.3	0.59	0.03	0	0.08	0.02	0.89	20.43	0.59	3.65	0.05	25.73	32.79	100	06_ANA
87	Cinnamomum micranthum	0.01	4.57	11.26	0	0.86	0	0.06	0.01	0.63	10.49	0.05	2.98	0.21	20.12	48.76	100	07_Magnoliids
88	Persea americana	0	4.95	13.16	0.24	0.39	0	0.16	0.06	0.36	8.89	0.02	2.99	0.59	17.83	50.36	100	07_Magnoliids
89	Liriodendron chinense	0.03	2.65	17.94	0	0.05	0	0	0.16	0.12	15.08	0.04	1.32	0.01	11.48	51.11	100	07_Magnoliids
90	Magnolia ashei	0.02	4.77	13.19	0	0.09	0.08	0	0.02	0.16	15.66	0.03	1.11	0.1	6.68	58.08	100	07_Magnoliids
91	Spirodela polyrhiza	0.13	0.57	14.94	0.18	0	0	0	0	0.11	3.42	0	6.7	0.11	54.97	18.87	100	08_Monocots
92	Zostera marina	0	7.54	17.95	0.02	0.08	0	0	0	0.12	10.94	0.09	2.79	0.13	13.25	47.1	100	08_Monocots
93	Dioscorea alata	0.06	2.19	20.84	0.01	0.06	0	0.05	0	0.2	9.5	0.09	4.42	0.16	28.14	34.27	100	08_Monocots
94	Dioscorea rotundata	0.1	2.18	19.64	0.2	0.08	0	0.09	0	0.23	11.83	0.03	4.7	0.05	29.96	30.9	100	08_Monocots
95	Trichopus zeylanicus	0.21	0.52	18.25	0	0.19	0	0	0.55	0.35	20.82	0.16	3.05	0.08	16.46	39.35	100	08_Monocots
96	Xerophyta viscosa	0	2.68	8.01	0.02	0.65	0	0.04	0.2	0.39	16.03	0.06	3.09	0.32	24.39	44.11	100	08_Monocots
97	Asparagus officinalis	0	2.01	33.26	0.03	0.02	0	0.06	0.02	0.8	8.74	0	1.47	0.01	9.5	44.06	100	08_Monocots
98	Apostasia shenzhenica	0.09	6.64	11.86	0	0.15	0	0	0.07	0.12	12.57	0.13	3.1	0.12	16.33	48.83	100	08_Monocots
99	Gastrodia elata	0	5.65	26.13	0	0.07	0	0	0	0.46	8.01	0.04	1.69	0.04	12.29	45.62	100	08_Monocots
100	Dendrobium catenatum	0	4.49	16.93	0.04	0.52	0	0	0.01	0.14	8.4	0	2.01	0.27	9.7	57.48	100	08_Monocots
101	Phalaenopsis aphrodite	0.12	4.35	23.92	0	0.02	0	0	0	0.17	8.59	0	2.32	0.61	13.2	46.71	100	08_Monocots
102	Phalaenopsis equestris	0.09	4.8	24.15	0	0	0	0	0	0.08	8.4	0	2.16	0.15	11.65	48.52	100	08_Monocots
103	Vanilla planifolia	0	5.31	23.21	0.06	0.13	0	0	0	0.04	3.34	0.27	4.97	0	17.89	44.78	100	08_Monocots
104	Cocos nucifera	0	0.88	39.68	0	0.14	0	0.03	0.06	0.06	9.24	0	1.94	0.7	10.81	36.47	100	08_Monocots
105	Elaeis guineensis	0.2	1.53	28.89	0	0.22	0	0.08	0	0.08	11.35	0	3.03	0.75	14.28	39.59	100	08_Monocots
106	Elaeis oleifera	0.01	2.42	31.55	0	0.36	0	0.09	0.09	0.13	10.4	0.01	2.84	1.08	13.74	37.3	100	08_Monocots
107	Calamus simplicifolius	0.09	4.92	23.95	0.44	0.12	0	0.12	0	0.33	11.93	0.34	2.74	0.76	16.51	37.74	100	08_Monocots
108	Ananas comosus	0.4	1.37	12.48	0.03	0.01	0	0	0.08	0.26	13.91	0.08	3.48	0.1	22.99	44.8	100	08_Monocots
109	Raddia distichophylla	0	2.69	19.66	0.02	0.3	0.56	0	0.09	1.91	23.68	0.04	1.64	0.02	11.13	38.25	100	08_Monocots
110	Leersia perrieri	0	4.05	16.31	0	1.26	1.02	0	0	5.26	43.26	0.01	2.38	0.02	18.77	7.66	100	08_Monocots
111	Oryza barthii	0	2.94	11.74	0	1.45	0.88	0	0	12.45	49.23	0.01	2.04	0.13	16.69	2.44	100	08_Monocots
112	Oryza brachyantha	0	0.98	9.13	0	0.67	0.19	0	0	13.57	51.78	0	1.98	0.05	16.37	5.28	100	08_Monocots
113	Oryza glaberrima	0	2.67	12.71	0	1.16	0.8	0	0	11.91	48	0.16	2.06	0.03	17.7	2.79	100	08_Monocots
114	Oryza glumipatula	0	2.66	13.21	0	0.94	0.87	0.04	0	12.18	47.56	0	2.14	0.02	18.66	1.72	100	08_Monocots
115	Oryza longistaminata	0	2.87	13.49	0	1.64	0.74	0	0	12.07	46.92	0.04	2.08	0.07	18.03	2.04	100	08_Monocots
116	Oryza meridionalis	0	2.58	14.16	0	1.34	0.86	0.01	0	11.67	47.65	0	2.03	0.03	17.42	2.25	100	08_Monocots
117	Oryza meyeriana var. granulata	0	1.2	37	0	0.33	0.13	0	0	5.89	30.3	0.14	1.71	0.08	12.05	11.16	100	08_Monocots
118	Oryza punctata	0	2	21.76	0	1.14	0.86	0	0	7.45	43.92	0	2.26	0.01	17.4	3.2	100	08_Monocots
119	Oryza rufipogon	0	2.45	17.01	0	0.9	0.78	0	0	9.95	47.29	0	1.99	0.25	17.27	2.11	100	08_Monocots
120	Oryza sativa	0	2.36	12.43	0	1.04	0.74	0	0	11.16	47.64	0.05	2.2	0.2	19.56	2.61	100	08_Monocots
121	Oryza sativa f. spontanea	0.02	2.75	12.84	0	1.18	0.69	0	0	11.48	48.25	0.01	2.16	0.02	18.91	1.67	100	08_Monocots
122	Zizania latifolia	0	1.64	23.78	0	0.22	0.18	0	0	2.23	35.29	0	1.66	0.15	13.31	21.54	100	08_Monocots
123	Brachypodium distachyon	0.02	5.49	12.87	0.05	0.68	0.95	0.02	0	2.43	34.71	0.16	2.26	0.06	16.21	24.09	100	08_Monocots
124	Dactylis glomerata	0	3.33	46.51	0	0.15	0.78	0	0	0.59	13.44	0	0.53	0.03	3.6	31.03	100	08_Monocots
125	Lolium perenne	0	11.93	19.45	0	0.61	2.88	0	0	1.09	14.52	0	1.48	0.05	9.34	38.66	100	08_Monocots
126	Hordeum pubiflorum	0	2.66	54.18	0	0.3	0.72	0	0.01	0.76	13.19	0	0.62	0.02	4.1	23.43	100	08_Monocots
127	Hordeum vulgare	0	2.25	51.81	0	0.2	0.58	0	0	0.84	18.22	0.03	1.48	0.7	8.9	14.99	100	08_Monocots
128	Aegilops tauschii	0	3.12	37.63	0	0.11	0.48	0	0.05	2.47	27.94	0.09	1.25	0.36	8.49	18.02	100	08_Monocots
129	Triticum aestivum	0.1	3.19	38.14	0	0.04	0.42	0	0.04	2.03	25.7	0.03	1.19	0.08	7.6	21.45	100	08_Monocots
130	Triticum dicoccoides	0	2.97	40.14	0	0.39	0.62	0	0	1.38	25.92	0	1.16	0.14	7.9	19.4	100	08_Monocots
131	Triticum urartu	0	2.66	39.89	0.09	0.12	0.52	0	0.04	1.59	23.44	0	1.29	0.35	7.98	22.01	100	08_Monocots
132	Eleusine coracana	0	2.59	50.01	0	0.42	0.11	0	0	1.02	13.58	0.04	1.28	0.03	10.85	20.07	100	08_Monocots
133	Eleusine indica	0.09	4.49	37.82	0	0.73	0.2	0	0	1.65	18.76	0	1.54	0.04	11.42	23.26	100	08_Monocots
134	Oropetium thomaeum	0.03	3.77	15.42	0	1.25	0	0	0	3.14	18.24	0.05	2.35	0	24.38	31.38	100	08_Monocots
135	Eragrostis curvula	0	5.12	18.34	0.16	1.83	0.43	0	0	2.24	30.25	0.01	2.29	0	22.16	17.17	100	08_Monocots
136	Eragrostis tef	0	6.13	14.47	0	2.45	0.57	0	0	1.81	26.17	0.02	2.54	0	21.39	24.45	100	08_Monocots
137	Sporobolus alterniflorus	0	5.54	35.56	0	1.68	0.4	0	0	2.38	20.58	0	1.32	0.13	9.37	23.04	100	08_Monocots
138	Zoysia japonica	0	2.59	16.97	0	1.25	0.06	0	0	2.82	31.11	0	1.74	0.24	15.05	28.18	100	08_Monocots
139	Zoysia matrella	0	2.77	20.01	0	1.3	0.23	0	0.04	5.32	34.41	0	1.89	0.28	16.13	17.62	100	08_Monocots
140	Zoysia pacifica	0	2.77	18.93	0	1.32	0.08	0.03	0	2.29	32.52	0	1.66	0.39	14.2	25.8	100	08_Monocots
141	Coix aquatica	0	1.16	47.82	0	0.31	0.03	0	0	1.28	23.89	0.04	1.44	0	12.91	11.12	100	08_Monocots
142	Miscanthus sacchariflorus	0	2.74	46.09	0	0.7	0.26	0	0	2.8	24.23	0	0.96	0.16	7.48	14.58	100	08_Monocots
143	Saccharum hybrid cultivar	0.06	4.46	23.8	0	1.19	0.24	0	0	2.77	37.05	0.02	1.78	0.05	14.87	13.72	100	08_Monocots
144	Saccharum spontaneum	0	4.51	28.94	0	1.08	0.41	0	0.05	3.49	32.93	0	1.73	0.19	13.72	12.96	100	08_Monocots
145	Sorghum bicolor	0.04	2.74	30.38	0	0.45	0.04	0	0	3.3	36.41	0.03	1.65	0.87	17.13	6.95	100	08_Monocots
146	Zea mays	0	2.12	47.72	0	0.62	0.13	0	0	3.49	22.11	0	1.26	0.11	10.4	12.04	100	08_Monocots
147	Alloteropsis semialata	0	3.31	27.94	0	0.93	0.37	0	0.02	2.65	29.94	0.03	1.83	0.1	13.68	19.2	100	08_Monocots
148	Echinochloa crus-galli	0	3.86	29.12	0	1.1	0.68	0	0.05	2.17	28.26	0.07	1.75	0.2	14.79	17.94	100	08_Monocots
149	Cenchrus americanus	0	2.07	45.87	0	0.76	0.24	0	0	0.8	16.51	0	1.18	0.03	8.72	23.82	100	08_Monocots
150	Setaria italica	0	3.5	23.25	0	0.9	0.73	0	0	1.67	32.09	0	2.34	0.05	18.26	17.22	100	08_Monocots
151	Setaria viridis	0	3.23	24.33	0.05	0.49	0.63	0	0	1.83	32.31	0	2.45	0.05	18.83	15.79	100	08_Monocots
152	Dichanthelium oligosanthes	0	1.79	34.04	0	0.43	0.04	0.02	0	1.27	21.46	0	1.33	0.01	10.54	29.07	100	08_Monocots
153	Urochloa ruziziensis	0	2.96	39.85	0	1.03	0.66	0	0	1.81	25.42	0	1.45	0.08	9.91	16.83	100	08_Monocots
154	Panicum miliaceum	0	2.94	28.67	0	0.97	0.36	0	0	1.68	22.28	0.03	2.57	0.21	21.77	18.52	100	08_Monocots
155	Panicum hallii	0	1.66	35.83	0	0.85	0.45	0	0	0.71	21.74	0.05	2.27	0.2	19.42	16.81	100	08_Monocots
156	Eichhornia paniculata	0.04	2.61	20.8	0	0.05	0	0	0.02	0.21	6.74	0.07	2.51	0.06	18.15	48.74	100	08_Monocots
157	Musa acuminata	0	2.35	33.4	0	0.59	0	0	0.27	0.07	4.82	0.02	3.43	0.14	23.88	31.04	100	08_Monocots
158	Musa balbisiana	0	2.24	31.86	0.16	0.82	0	0.22	0	0.38	7.98	0.62	3.33	0.09	25.26	27.03	100	08_Monocots
159	Musa itinerans	0	2.45	31.43	0.03	0.66	0	0	0	0.14	5.07	0.09	3.46	0.11	23.28	33.29	100	08_Monocots
160	Musa schizocarpa	0.44	2.55	36.66	0.02	0.69	0	0	0	0.02	6.13	0.81	3.04	0.07	22.9	26.65	100	08_Monocots
161	Berberis thunbergii	0.01	4.4	17.6	0	0.36	0	0.04	0	0.6	14.35	0.13	2.59	0	13.04	46.87	100	09_Base_eudicots
162	Eschscholzia californica	0.2	2.92	17.86	0.15	0.87	0	0.03	0.38	0.93	8.73	0.06	2.74	0.42	13.02	51.68	100	09_Base_eudicots
163	Macleaya cordata	0	2.09	12.53	0	0.28	0	0.26	0.13	0.55	12.24	0	3.43	0.15	16.5	51.84	100	09_Base_eudicots
164	Papaver somniferum	0	5.36	25.74	0	0.23	0	0.06	0.07	0.26	6.58	0.01	1.76	0.18	8.22	51.53	100	09_Base_eudicots
165	Aquilegia coerulea	0	6.06	12.92	0	1.23	0	0.04	0.03	0.82	9.77	0.11	3.61	0.21	21.84	43.35	100	09_Base_eudicots
166	Nelumbo nucifera	0	7.88	16.49	0	0.79	0	0.13	0.02	0.14	16.82	0.01	2.34	0.05	12.34	43.01	100	09_Base_eudicots
167	Macadamia integrifolia	0	5.97	14.64	0.03	1.78	0	0.07	0.38	0.19	8.06	0.12	2.99	0.32	21.37	44.08	100	09_Base_eudicots
168	Kalanchoe fedtschenkoi	0	1.9	10.81	0	0.03	0	0	0	0.46	18.31	0.07	2.33	0.37	10.47	55.25	100	10_Super_rosids
169	Sedum album	0.02	1.85	15.58	0.17	0.21	0	0.06	0.04	0.53	12.03	0.08	2.19	0.14	9.77	57.34	100	10_Super_rosids
170	Cissus quadrangularis	0	5.66	28.09	0	0.04	0	0	0	0.28	3.38	0.01	3.76	0.13	15.08	43.56	100	10_Super_rosids
171	Vitis aestivalis	0	4.98	13.22	0	0.01	0	0	0	0.3	1.52	0.04	3.11	0.01	12.55	64.25	100	10_Super_rosids
172	Vitis cinerea x Vitis riparia	0	6.15	26.79	0	0.25	0	0	0	0.42	19.04	0.03	5.86	0.02	23.59	17.85	100	10_Super_rosids
173	Vitis riparia	0.02	4.88	24.78	0.02	0.09	0	0	0.01	0.56	20.58	0	5.59	0	25.28	18.19	100	10_Super_rosids
174	Vitis vinifera	0.02	4.77	25.13	0	0.12	0	0	0	0.42	19.62	0.03	5.53	0.16	24.82	19.38	100	10_Super_rosids
175	Vitis x labruscana x Vitis vinifera	0.03	4.87	28.82	0	0.06	0	0	0	0.41	19.01	0.08	5.75	0.55	25.21	15.2	100	10_Super_rosids
176	Aristotelia chilensis	0	3.11	4.25	0	0	0.05	0	0	0.19	4.95	0	8.95	0	40.77	37.72	100	11_Fabids
177	Cephalotus follicularis	0	2.5	32.99	0.27	0.06	0	0.25	1.18	0.02	6.21	0	1.06	0.2	6.95	48.3	100	11_Fabids
178	Populus simonii	0	1.28	21.02	0	2.66	0	0	0	12.97	9.86	0.2	4.44	0.47	22.86	24.25	100	11_Fabids
179	Salix brachista	0.06	0.44	20.03	0	5.4	0	0.04	0	13.28	10.43	0.11	4.14	0	25.41	20.66	100	11_Fabids
180	Caryocar brasiliense	0	1.96	23.35	0.05	0	0	0.15	0	0.06	4.42	0.04	7.1	0.05	27.31	35.51	100	11_Fabids
181	Ricinus communis	0.18	0.59	25.9	0.07	0.26	0	0	0	0.32	8.25	0.6	6.13	3.89	26.45	27.35	100	11_Fabids
182	Jatropha curcas	0	3.37	22.35	0.01	0.15	0	0	0	0.96	10.82	0.09	4.87	0	25.55	31.81	100	11_Fabids
183	Manihot esculenta	0.36	1.59	28.66	0.01	0.04	0	0	0	0.06	8.93	0	5.23	0	20.57	34.55	100	11_Fabids
184	Hevea brasiliensis	0.1	1.03	46.61	0	0.08	0	0	0	0.07	3.66	0.01	3.54	0	19.72	25.19	100	11_Fabids
185	Linum usitatissimum	0	6.22	20.54	0.02	0.14	0	0.05	0.02	0.22	12.84	0.1	3.18	0.15	16.72	39.8	100	11_Fabids
186	Passiflora edulis	0	5.01	20.7	0	0.27	0	0	0	0.18	2.96	0.02	2.64	0	11.85	56.37	100	11_Fabids
187	Rhizophora apiculata	0.16	2.09	14.94	0	1.09	0	0	0	0.46	2.39	0.17	9.01	0.12	47.28	22.29	100	11_Fabids
188	Populus alba	0	1.21	20.58	0.05	2.54	0	0.05	0	11.66	10.44	0.04	5.02	0.2	26.5	21.71	100	11_Fabids
189	Populus euphratica	0.05	0.65	29.46	0	2.19	0	0	0.09	9.16	7.92	0.09	5.12	0.04	25.18	20.05	100	11_Fabids
190	Populus trichocarpa	0	0.96	22.41	0	2.62	0	0.03	0	15.29	9.95	0.02	4.43	0.84	22.17	21.26	100	11_Fabids
191	Glycine tomentella	0	2.17	24.34	0	0.87	0	0.46	0.02	0.12	12.36	0.02	5.12	0	23.96	30.56	100	11_Fabids
192	Carpinus fangiana	0	3.79	14.32	0.03	0.23	0	0	0.08	0.24	10.38	0.03	4.26	0.04	23.98	42.62	100	11_Fabids
193	Chamaecrista fasciculata	0	3.23	15.15	0.01	0.88	0	0	0	0.91	14.91	0.03	2.98	0.02	17.68	44.19	100	11_Fabids
194	Vachellia collinsii	0	3.17	11.89	0	0.31	0	0.03	0.03	0.85	12.46	0.02	3.24	0.36	19.16	48.48	100	11_Fabids
195	Mimosa pudica	0	2.67	8.24	0	1.85	0	0	0	0.6	8.39	0.02	2.51	0.05	12.56	63.12	100	11_Fabids
196	Prosopis alba	0.01	1.12	11.27	0	0.23	0	0	0	0.58	9.5	0.04	3.38	0.04	16.67	57.17	100	11_Fabids
197	Cercis canadensis	0.02	2.17	16.92	0.02	0.18	0	0	0	0.96	8.51	0.03	4.41	0.29	20.22	46.26	100	11_Fabids
198	Nissolia schottii	0	2.48	15.37	0	0.31	0	0.28	0.16	0.29	11.17	0.03	2.84	0.33	15.56	51.17	100	11_Fabids
199	Arachis duranensis	0	1.6	36.44	0	0.9	0	0	0.03	0.55	10.39	0	3.89	0.05	15.64	30.51	100	11_Fabids
200	Arachis hypogaea	0	1.51	33.6	0.09	0.98	0	0.06	0.06	0.39	10.23	0.02	4.16	0	19.47	29.45	100	11_Fabids
201	Arachis ipaensis	0	1.84	39.99	0	0.69	0	0	0	0.28	9.51	0	3.66	0	15.05	28.98	100	11_Fabids
202	Arachis monticola	0	1.69	34.49	0.12	0.68	0	0	0.49	0.34	10.45	0.04	4.32	0	20.15	27.23	100	11_Fabids
203	Lupinus angustifolius	0	3.2	20.99	0	1.39	0	0	0	0.45	12.19	0.07	2.2	0.08	10.79	48.66	100	11_Fabids
204	Cicer arietinum	0	2.62	22.42	0	0.06	0	0.03	0.06	0.23	12.8	0.05	3.76	1.05	17.65	39.27	100	11_Fabids
205	Cicer echinospermum	0	2.47	24.17	0.02	0.11	0	0.04	0.09	0.66	15.3	0.02	4.07	1.55	19.32	32.19	100	11_Fabids
206	Cicer reticulatum	0	3.46	20.07	0	0.11	0	0	0	0.15	15.64	0.01	3.89	0.27	17.17	39.22	100	11_Fabids
207	Vicia faba	0.09	3.41	12.58	0.07	0.52	0	0.1	0.06	0.86	8.94	0.04	6.17	0.05	27.78	39.33	100	11_Fabids
208	Medicago truncatula	0.24	6.57	14.9	0	2.46	0	0	0.14	2.04	25.15	0.07	3.12	0.2	15.03	30.09	100	11_Fabids
209	Trifolium subterraneum	0.01	3.79	16.9	0.02	1.58	0	0	0.04	2.77	18.2	0.01	2.73	0.05	12.91	40.98	100	11_Fabids
210	Lotus japonicus	0	5.15	18.43	0	1.03	0	0	0	0.97	16.08	0	3.57	0.25	15.53	38.97	100	11_Fabids
211	Abrus precatorius	0	2.63	15.3	0	0.14	0	0	0.07	0.47	7.59	0.23	7.12	0.03	27.78	38.62	100	11_Fabids
212	Cajanus cajan	0.18	1.34	20.1	0.5	0.11	0	0.13	0	0.47	9.24	0.01	3.32	0.4	16.48	47.72	100	11_Fabids
213	Glycine max	0	2.38	24.11	0.02	0.89	0	0.06	0	0.33	12.75	0.02	5.36	0.77	24.36	28.96	100	11_Fabids
214	Glycine soja	0.07	1.71	30.04	0	0.36	0.01	0.34	0	0.25	10.53	0.02	4.33	0.35	19.47	32.51	100	11_Fabids
215	Mucuna pruriens	0	1.48	15.38	0.15	0.23	0	0.13	0	0.05	6.7	0	5.58	0.17	20.83	49.3	100	11_Fabids
216	Phaseolus vulgaris	0.07	3.37	23.83	0	0.03	0	0	0	0.54	6.18	0	4.82	0.12	19.1	41.95	100	11_Fabids
217	Spatholobus suberectus	0	1.85	13.87	0.07	0.68	0	0.02	0	0.53	19.49	0.04	3.48	0	16.62	43.34	100	11_Fabids
218	Vigna angularis	0	0.7	20.52	0.04	0.08	0	0	0.04	0.16	7.09	0.05	4.38	0.07	17.73	49.14	100	11_Fabids
219	Vigna radiata	0	0.45	22.58	0	0.04	0	0	0	0.14	6.75	0.04	5	0.06	21.39	43.55	100	11_Fabids
220	Vigna unguiculata	0	0.64	20.12	0	0.1	0	0	0.1	0.81	14.51	0.06	4.65	0.07	23.06	35.88	100	11_Fabids
221	Quillaja saponaria	0.02	3.55	7.56	0	0.11	0	0	0.02	0.28	1.5	0.05	5.74	0.25	25.38	55.54	100	11_Fabids
222	Cannabis sativa	0.03	4.95	29.23	0	0.11	0	0.04	0.07	0.08	6.89	0	3.73	0.03	20.48	34.38	100	11_Fabids
223	Humulus lupulus	0	1.78	36.83	0.03	0.06	0	0	0.16	0.27	6.74	0	2.12	0	10.62	41.38	100	11_Fabids
224	Parasponia andersonii	0	1	18.24	0	0.02	0	0	0.18	0.45	7.93	0	4.88	0.12	28.01	39.15	100	11_Fabids
225	Trema orientale	0	0.99	12.94	0	0.02	0.02	0	0.21	0.49	11.41	0	5.04	0.05	26.92	41.91	100	11_Fabids
226	Artocarpus camansi	0	0.87	27.42	0.09	0.05	0	0	0	0.06	6.97	0.05	4.34	0.07	21.96	38.12	100	11_Fabids
227	Ficus carica	0	0.32	6.81	0.01	0.07	0	0	0.1	0.32	7.37	0.03	6.08	0.06	38.74	40.1	100	11_Fabids
228	Ficus erecta	0.06	1.69	9.83	0	0.57	0	0.13	0	0.76	14.02	0.24	6.09	0.03	39.43	27.13	100	11_Fabids
229	Morus notabilis	0	0.86	20.02	0.06	0.07	0	0.14	0.01	0.72	8.82	0.04	4.49	0	26.89	37.87	100	11_Fabids
230	Ochetophila trinervis	0	1.94	13.3	0.23	0	0	0	0.06	0.56	12.41	0.01	5.7	0.01	26.94	38.84	100	11_Fabids
231	Ziziphus jujuba	0	1.26	15.66	0.39	0.14	0.01	0.1	0.19	1.02	8	0.15	7.2	0.05	43.08	22.77	100	11_Fabids
232	Prunus avium	0.04	2.1	18.45	0.1	1.56	0.03	0	0.01	0.91	17.15	0.04	3.68	0	18.77	37.16	100	11_Fabids
233	Prunus dulcis	0	1.33	18.35	0	2.05	0.04	0	0	0.45	20.15	0.07	5	0.07	29.13	23.38	100	11_Fabids
234	Prunus mume	0	1.22	15.25	0	1.7	0	0.02	0.03	0.63	18.43	0.03	4.22	0.01	23.46	34.99	100	11_Fabids
235	Prunus persica	0	1.75	15.41	0	1.21	0	0.07	0	0.71	18.76	0.19	4.69	0.32	25.75	31.14	100	11_Fabids
236	Prunus yedoensis	0	2.35	15.96	0.05	2.02	0.01	0.04	0.08	1.08	20.65	0.16	3.92	0.16	20.51	33.02	100	11_Fabids
237	Malus baccata	0.01	3	31.21	0	2.81	0.1	0	0	1.18	27.51	0.05	2.88	0.03	14.39	16.83	100	11_Fabids
238	Malus domestica	0	3.28	30.23	0	2.92	0.11	0.01	0.01	1.66	28.5	0.06	2.86	0.03	14.27	16.06	100	11_Fabids
239	Pyrus betulifolia	0	2.38	23.59	0.13	3.32	0.16	0	0	1.51	28.91	0.08	3.44	0	19.35	17.13	100	11_Fabids
240	Pyrus x bretschneideri	0.04	2.01	24.93	0	3.15	0.12	0	0	1.41	29	0.11	3.32	0.02	18.61	17.26	100	11_Fabids
241	Pyrus ussuriensis x Pyrus communis	0	2.59	26.48	0	4.08	0.15	0	0	1.43	27.56	0.05	3.52	0.01	19.89	14.25	100	11_Fabids
242	Dryas drummondii	0	1.45	11.83	0	0.61	0	0.09	0.09	0.28	19.42	0.08	4.43	0.55	26.01	35.16	100	11_Fabids
243	Purshia tridentata	0	2.2	11.87	0	0.22	0	0.08	0.07	0.98	16.8	0.04	5.43	0.15	27.91	34.26	100	11_Fabids
244	Geum urbanum	0	3.21	30.36	0.06	0.08	0	0	0	0.71	21.24	0.09	1.98	0.92	13.04	28.3	100	11_Fabids
245	Fragaria nubicola	0.44	4.17	19.52	0	1.43	0.01	0	0	1.06	26.36	0.03	3.37	0.28	19.46	23.85	100	11_Fabids
246	Fragaria orientalis	0.78	4.41	20.11	0.01	1.3	0.05	0	0.17	1	26.02	0.03	2.77	0.34	15.27	27.74	100	11_Fabids
247	Fragaria vesca	0.08	4.45	13.46	0.18	1.71	0.07	0.39	0	0.56	24.31	0.05	4.74	0.23	25.9	23.87	100	11_Fabids
248	Fragaria x ananassa	0.33	3.63	31.66	0	1.3	0	0.11	0	0.3	23.67	0.01	2.18	0.09	12.07	24.64	100	11_Fabids
249	Rosa chinensis	0.02	4.67	19.46	0	0.78	0	0	0.04	0.6	18.05	0.05	3.53	0.3	20.94	31.58	100	11_Fabids
250	Rosa lucieae	0.02	3.32	30.76	0.03	0.53	0	0	0.01	0.64	17.16	0.25	2.33	0.42	14.26	30.27	100	11_Fabids
251	Rosa x damascena	0.05	4.85	29.03	0.03	0.63	0	0	0	0.57	18.35	0.01	2.67	0.3	14.99	28.51	100	11_Fabids
252	Boehmeria nivea	0	1.13	10.44	0	0.14	0.01	0	0	0.34	6.79	0.04	5.08	0.03	29.5	46.49	100	11_Fabids
253	Begonia fuchsioides	0	3.69	24.33	0	0.04	0	0	0	0.23	12.69	0.41	3.41	0.29	17.18	37.73	100	11_Fabids
254	Benincasa hispida	0	2.19	38.62	0	0.34	0	0	0.27	0	10.77	0.04	3.07	0.35	14.24	30.12	100	11_Fabids
255	Citrullus lanatus	0	1.66	14.98	0	0.62	0	0.14	0	0.03	5.69	0.04	3.98	0.31	19.57	52.97	100	11_Fabids
256	Cucumis melo	0.13	1.48	14.93	0	0.39	0	0	0.06	0.25	12.63	0.13	4.38	0.23	19.89	45.5	100	11_Fabids
257	Cucumis sativus	0	3.77	13.51	0.05	0.63	0	0	0.04	0.23	8.55	0.1	6.8	0.37	27.01	38.94	100	11_Fabids
258	Lagenaria siceraria	0	2.51	11.53	0	0.98	0	0	0	0.1	9.34	0.09	3.63	0.21	19.94	51.66	100	11_Fabids
259	Cucurbita argyrosperma	0	1.34	26.75	0	2.62	0.02	0	0	0.32	4.11	0.96	5.73	0.05	30.08	28.01	100	11_Fabids
260	Cucurbita moschata	0	1.37	28.52	0	4.57	0	0	0.16	0.81	4.12	0.51	4.79	0.23	26.05	28.86	100	11_Fabids
261	Momordica charantia	0.2	3.17	8.02	0	0.46	0	0	0	0.04	1.85	0.24	4.32	0.17	17.26	64.26	100	11_Fabids
262	Datisca glomerata	0	3.97	23.58	0	0.27	0	0.03	0.04	0.91	13.44	0.48	2.23	0.49	9.46	45.1	100	11_Fabids
263	Alnus glutinosa	0.05	4.3	15.02	0	0.45	0	0	0.27	0.24	7.92	0.03	3.47	0.14	20.46	47.66	100	11_Fabids
264	Betula nana	0	3.78	12.23	0	0.08	0.04	0.01	0	0.31	9.57	0.06	3.89	0.01	20.91	49.11	100	11_Fabids
265	Betula pendula	0.06	4.64	12.19	0.03	0.04	0.03	0	0.03	0.34	7.49	0.06	4.01	0.05	20	51.03	100	11_Fabids
266	Casuarina equisetifolia	0	4.65	20.32	0.11	0.15	0	0	0.13	1.75	2.64	0.48	5.23	0.05	23.52	40.96	100	11_Fabids
267	Casuarina glauca	0.02	4.6	14.6	0	0.05	0	0	0.01	1.58	0.07	0.34	4.69	0	20.08	53.96	100	11_Fabids
268	Castanea mollissima	0	3.28	15.03	0	0.35	0	0	0.08	0.66	10.21	0.05	3.87	0.07	25.22	41.2	100	11_Fabids
269	Fagus sylvatica	0.01	3.3	10.62	0.05	0.82	0	0	0.01	0.56	7.78	0.15	4.37	0.17	26.67	45.47	100	11_Fabids
270	Quercus lobata	0.03	3.5	8.95	0	0.15	0	0.82	0	0.66	8.71	0.21	3.94	0.03	26.43	46.57	100	11_Fabids
271	Quercus robur	0.42	3.13	10.48	0.01	0.17	0	0.51	0.01	0.61	9.5	0.02	3.88	0.09	25.06	46.11	100	11_Fabids
272	Quercus suber	0.14	3.43	9.78	0.07	0.56	0	0.18	0	0.28	8.33	0.02	4.02	0.2	26.94	46.05	100	11_Fabids
273	Juglans cathayensis	0	5.21	11.18	0	0.38	0	0.01	0.18	0.34	9.29	0	2.76	0.07	18.57	52.01	100	11_Fabids
274	Juglans hindsii	0.07	4.97	11.73	0.03	0.44	0	0.05	0	0.38	7.97	0.08	2.78	0.09	20.15	51.27	100	11_Fabids
275	Juglans mandshurica	0	6.38	11.2	0	0.37	0	0	0.07	0.39	7.19	0	3.12	0.18	20.25	50.86	100	11_Fabids
276	Juglans microcarpa	0.04	5.4	11.83	0	0.38	0	0	0.05	0.24	8	0.11	2.88	0.01	19.64	51.44	100	11_Fabids
277	Juglans microcarpa x Juglans regia	0	6.1	10.83	0	0.54	0	0.03	0.13	0.42	9.02	0	3.18	0.18	22.55	47	100	11_Fabids
278	Juglans nigra	0.11	5.16	13.29	0.07	0.59	0	0	0.07	0.28	7.3	0.13	2.76	0.01	18.81	51.43	100	11_Fabids
279	Juglans regia	0	4.83	11.19	0.04	0.39	0	0	0.08	0.27	7.75	1.4	2.79	0.71	19.85	50.7	100	11_Fabids
280	Juglans sigillata	0	5.61	12.75	0	0.39	0	0	0.01	0.3	7.8	0	2.81	0.13	18.78	51.44	100	11_Fabids
281	Pterocarya stenoptera	0	6.16	11.62	0	0.47	0	0	0.07	0.88	8.23	0.18	3	0.17	18.68	50.53	100	11_Fabids
282	Morella rubra	0.02	2.57	12.98	0.13	0.5	0	0.1	0.08	0.91	11.5	0.08	3.77	0.01	18.31	49.04	100	11_Fabids
283	Punica granatum	0.04	1.69	12.13	0.05	1.08	0.04	0.08	0	0.62	7.72	0.05	3	0.3	20.76	52.45	100	12_Malvids
284	Eucalyptus grandis	0	2.5	21.05	0	0.62	0	0.01	0	0.95	21.57	0.02	2.85	0.17	18.51	31.76	100	12_Malvids
285	Eucalyptus melliodora	0	2.09	19.81	0	0.47	0.02	0.04	0.08	1.01	22.2	0.3	3.25	0.19	21.08	29.46	100	12_Malvids
286	Eucalyptus pauciflora	0	1.79	20.67	0	1.05	0	0.09	0.05	1.38	26.44	0.15	3.29	0.17	19	25.93	100	12_Malvids
287	Gossypium darwinii	0	1.49	51.18	0	0	0	0	0	0.35	8.41	0.06	3.51	0.06	12.31	22.62	100	12_Malvids
288	Gossypium mustelinum	0	1.35	53.8	0	0	0	0	0	0.09	7.36	0.02	3.28	0	11.58	22.53	100	12_Malvids
289	Gossypium tomentosum	0	2.16	52.27	0	0.06	0.03	0	0	0.09	6.7	0.11	3.61	0	12.25	22.73	100	12_Malvids
290	Gossypium turneri	0	2.12	39.97	0	0.01	0	0	0	0.63	10.65	0.03	3.9	0	16.23	26.46	100	12_Malvids
291	Metrosideros polymorpha	0.01	1.52	15.39	0	0.47	0.03	0	0.05	0.51	28.54	0.34	2.35	0.12	15.05	35.63	100	12_Malvids
292	Rhodamnia argentea	0.01	1.85	15.12	0	0.51	0	0	0.01	1.04	26.76	0.42	2.92	0.18	21.2	29.98	100	12_Malvids
293	Psidium guajava	0	2.59	20.42	0	0.61	0	0	0.15	0.65	23.94	0.24	2.55	0.68	14.68	33.49	100	12_Malvids
294	Syzygium oleosum	0.02	1.78	20.76	0.03	0.58	0	0	0	0.63	28.02	0.12	2.78	0.07	17.57	27.65	100	12_Malvids
295	Azadirachta indica	0	1.33	16.69	0.02	0.04	0	0	0	1.12	9.69	0.12	5.56	0.02	30.4	35	100	12_Malvids
296	Atalantia buxifolia	0	2.71	17.28	0.11	0.17	0	0.13	0.27	0.58	12.13	0.04	3.63	0.01	20.39	42.55	100	12_Malvids
297	Citrus cavaleriei	0	1.98	19.16	0	0.41	0	0	0.21	0.75	12	0.01	4.11	0.03	21.4	39.94	100	12_Malvids
298	Citrus clementina	0	2.04	17.24	0.03	0.15	0	0.08	0.3	0.88	12.99	0.02	3.99	0.08	22.27	39.93	100	12_Malvids
299	Citrus hindsii	0	1.82	17.21	0.02	0.36	0	0.06	0.34	0.89	13.82	0.11	4.51	0.14	23.72	36.98	100	12_Malvids
300	Citrus maxima	0	1.93	18.84	0.27	0.16	0	0.04	0.13	0.82	11.73	0.35	4.22	0.24	23.81	37.46	100	12_Malvids
301	Citrus medica	0.01	1.52	24.59	0	0.1	0	0.07	0.27	0.67	11.44	0.02	4.29	0	23.01	34	100	12_Malvids
302	Citrus reticulata	0.29	1.67	12.08	0	0	0	0	0	0.93	3.05	0.03	3.63	0.08	18.84	59.4	100	12_Malvids
303	Citrus sinensis	0.05	1.63	21.03	0.07	0.11	0	0.02	0.09	0.86	11.47	0.04	3.41	0.14	17.95	43.12	100	12_Malvids
304	Citrus unshiu	0	2.15	19.89	0	0.17	0.05	0	0.21	0.93	9.85	0.01	3.97	0.26	20.2	42.31	100	12_Malvids
305	Citrus x paradisi x Citrus trifoliata	0.06	2.46	24.58	0.01	0.12	0	0	0.02	0.69	11.09	0.01	3.54	0.01	16.47	40.95	100	12_Malvids
306	Acer yangbiense	0.05	2.41	20.47	0	0.28	0	0	0.14	0.41	13.44	0	3.78	0	25.46	33.56	100	12_Malvids
307	Xanthoceras sorbifolium	0	3.3	17.76	0.08	0.31	0	0	0.18	0.21	10.08	0.03	3.37	0.09	20.9	43.69	100	12_Malvids
308	Herrania umbratica	0	1.24	23.91	0.17	0	0	0	0	0.22	9.02	0	5.23	0	20.17	40.04	100	12_Malvids
309	Corchorus capsularis	0	2.93	18.32	0	0.02	0	0.06	0	0.57	12.64	0.12	4.21	0.16	20.21	40.75	100	12_Malvids
310	Corchorus olitorius	0	2.93	18.82	0	0.03	0	0	0.02	0.69	9.3	0.08	4.21	0.14	19.34	44.44	100	12_Malvids
311	Durio zibethinus	0	2.64	18.92	0	0.04	0	0	0.21	1.76	6.63	0.36	6.62	0.33	25.5	36.98	100	12_Malvids
312	Gossypioides kirkii	0.07	2.67	25.46	0	0.05	0	0	0.02	0.39	10.89	0.1	3.96	0.02	14.75	41.61	100	12_Malvids
313	Gossypium arboreum	0	0.97	52.25	0	0.05	0	0	0	0	4.69	0.07	2.88	0	10.99	28.11	100	12_Malvids
314	Gossypium barbadense	0	1.37	47.97	0	0	0	0	0.07	0.04	7.31	0.07	3.06	0	10.82	29.31	100	12_Malvids
315	Gossypium hirsutum	0	1.54	48.93	0	0.07	0	0.11	0.06	0.06	6.86	0.04	3.24	0	11.24	27.84	100	12_Malvids
316	Gossypium raimondii	0.01	1.69	37.29	0	0.38	0	0.04	0.08	0.19	9.8	0.08	3.58	0.01	13.92	32.93	100	12_Malvids
317	Gossypium thurberi	0	1.71	40.55	0	0.16	0	0	0	0.02	8.46	0.04	2.93	0	10.35	35.79	100	12_Malvids
318	Hibiscus syriacus	0.05	2.19	27.25	0	0.49	0	0.04	0.07	0.17	9.58	0	2.48	0.47	10.67	46.55	100	12_Malvids
319	Kokia drynarioides	0	2.43	28.61	0.06	0.22	0	0.02	0	0.15	8.2	0.01	4	0	15.16	41.14	100	12_Malvids
320	Aquilaria agallochum	0	2.75	25.92	0	0.11	0.08	0	0.17	0.4	13.51	0.04	2.33	0.04	11.84	42.81	100	12_Malvids
321	Aquilaria sinensis	0.14	2.36	20.06	0.05	0.17	0.08	0.02	0	0.27	12.13	0.04	2.49	0	12.59	49.6	100	12_Malvids
322	Aethionema arabicum	0	1.33	16.29	0.23	0.28	0	0.33	0.16	0.92	15.84	0	6.8	0.07	29.24	28.5	100	12_Malvids
323	Arabis alpina	0	4.87	19.46	0.03	1.11	0.09	0.02	0.08	4.18	16.87	0.08	3.5	0.28	14.92	34.5	100	12_Malvids
324	Arabis nordmanniana	0	4.45	23.23	0	1.41	0.07	0.02	0.1	1.45	15.48	0	5.16	0.08	23.42	25.13	100	12_Malvids
325	Aurinia saxatilis	0.1	6.99	28.4	0	0.69	0.1	0.02	0.03	1.55	13.69	0.03	2.35	0.16	12.07	33.83	100	12_Malvids
326	Odontarrhena argentea	0	4.63	11.33	0	1.23	0.1	0.12	0.13	1.73	12.76	0.03	5.36	0.12	28.09	34.37	100	12_Malvids
327	Anastatica hierochuntica	0	5.63	33.89	0.07	1.18	0.15	0.12	0	1.67	17.05	0.07	2.85	0.06	12.05	25.22	100	12_Malvids
328	Biscutella auriculata	0	3.43	19.37	0.32	0.35	0.18	0	0	0.53	21.67	0.01	3.05	0.02	12.45	38.61	100	12_Malvids
329	Biscutella laevigata	0	3.27	19.6	0	0.84	0.03	0	0	0.76	18.28	0	2.73	0.06	11.73	42.7	100	12_Malvids
330	Boechera puberula	0	4.02	20.69	0.05	0.48	0.03	0	0.11	2.69	17.74	0.02	5.41	0.05	25.5	23.22	100	12_Malvids
331	Boechera stricta	0	3.33	17.45	0	0.59	0	0.06	0.04	2.35	16.62	0.03	5.89	0.07	27.72	25.85	100	12_Malvids
332	Schrenkiella parvula	0	3.85	15.35	0	1.11	0.07	0.17	0.04	2.48	12.95	0.03	9.58	0	35.96	18.41	100	12_Malvids
333	Brassica cretica	0	4.79	23.3	0	1.28	0.02	0	0	1.34	18.12	0	3.08	0.49	15.08	32.48	100	12_Malvids
334	Brassica juncea	0.11	3.52	16.37	0.03	1.63	0.02	0.01	0.03	1.4	16.86	0.07	4.95	0.18	21.22	33.59	100	12_Malvids
335	Brassica napus	0	4.96	17.15	0.06	1.68	0.04	0	0.38	1.27	19.7	0.2	4.11	0.01	18.55	31.89	100	12_Malvids
336	Brassica nigra	0	3.52	17.63	0	0.99	0.02	0	0.02	1.36	17.6	0.03	4.88	0	21.84	32.11	100	12_Malvids
337	Brassica oleracea	0	5.18	18.97	0	1.21	0.02	0	0.02	0.88	17.48	0.05	3.44	0.17	16.15	36.44	100	12_Malvids
338	Brassica rapa	0.02	4.96	10.78	0	1.67	0.02	0.01	0	1.12	16.56	0.15	4.35	0.24	19.15	40.97	100	12_Malvids
339	Erucastrum elatum	0	5.38	11.53	0.04	2.07	0.17	0	0	3.37	18.76	0.03	4.99	0.23	22.14	31.28	100	12_Malvids
340	Raphanus raphanistrum	0.02	5.26	11.73	0.07	2.22	0.07	0	0	1.27	17.5	0.02	5.17	0.5	22.24	33.92	100	12_Malvids
341	Raphanus sativus	0	4.83	11.23	0	1.66	0.08	0	0.04	1.22	18.33	0.02	4.99	0.36	21.57	35.67	100	12_Malvids
342	Arabidopsis halleri	0	4.73	12.03	0.07	1.62	0.29	0	0	9.07	23.04	0.04	5.76	0.31	23.62	19.4	100	12_Malvids
343	Arabidopsis lyrata	0	4.06	11.53	0	1.4	0.24	0	0	11.2	19.82	0.06	6.88	0.14	30.97	13.68	100	12_Malvids
344	Arabidopsis thaliana	0	2.9	9.67	0.63	1.08	0.06	0	0	7.01	13.14	0.13	11.06	0.85	44.56	8.92	100	12_Malvids
345	Camelina sativa	0.01	4.58	16.91	0	0.44	0.06	0	0.02	6.97	13.75	0	5.82	0.38	29.42	21.63	100	12_Malvids
346	Capsella bursa-pastoris	0.07	4.25	9.68	0	1.06	0.06	0.16	0.05	5.03	13.72	0	8.56	1.54	38.64	17.18	100	12_Malvids
347	Capsella rubella	0.02	3.06	9.62	0	1.05	0.04	0	0	5.59	13.06	0.04	8.93	1.46	42.18	14.94	100	12_Malvids
348	Barbarea vulgaris	0	3.87	15.42	0	0.94	0.03	0.03	0.03	3.28	13.16	0	7.6	0.11	34.36	21.18	100	12_Malvids
349	Leavenworthia alabamica	0.14	3.87	16.91	0	1.51	0.03	0	0.02	1.62	18.71	0.01	7.32	0.2	30.02	19.63	100	12_Malvids
350	Nasturtium officinale	0	3.03	17.39	0	0.39	0	0	0	0.53	13.26	0.13	8.19	0	41.8	15.28	100	12_Malvids
351	Noccaea caerulescens	0.3	2.41	19.24	0	0.77	0	0	0	2.6	13.84	0.02	7.28	0	35.4	18.13	100	12_Malvids
352	Noccaea goesingensis	0	4.83	13.83	0.02	1.42	0.3	0.02	0.04	2.37	12.67	0.04	6.02	0.18	26.46	31.79	100	12_Malvids
353	Raparia bulbosa	0	3.23	15.5	0	1.11	0.23	0	0	1.96	12.74	0.03	7.22	0.07	38.04	19.87	100	12_Malvids
354	Conringia planisiliqua	0	2.37	20.09	0	1.15	0	0.09	0.05	1.43	10.41	0.35	7.26	0.05	31.67	25.08	100	12_Malvids
355	Cochlearia officinalis	0	1.83	8.59	0.08	0.79	0.05	0	0.03	2.45	26.24	0.11	4.29	0.41	20.37	34.77	100	12_Malvids
356	Crucihimalaya himalaica	0	3.89	20.61	0	0.5	0.03	0	0.16	3.33	21.3	0.02	4.51	0.15	21.5	24	100	12_Malvids
357	Erysimum cheiri	0	4.58	12	0	1.83	0.18	0	0.02	4.72	13.77	0.03	8.26	0.27	37.01	17.34	100	12_Malvids
358	Erysimum pusillum	0	3.94	10.82	0	1.16	0.03	0.21	0	4.02	11.89	0.06	10.16	0.11	42.89	14.71	100	12_Malvids
359	Euclidium syriacum	0	4.58	20.54	0	1.14	0	0.02	0	3.1	13.4	0.2	5.49	0.17	22.29	29.05	100	12_Malvids
360	Eutrema heterophyllum	0.09	3.82	24.48	0	0.86	0.12	0	0	2.71	18.79	0.03	3.49	0.19	15.35	30.07	100	12_Malvids
361	Eutrema salsugineum	0	3.25	23.09	0	0.62	0	0.19	0	2.57	12.77	0.02	6.03	0.21	26.5	24.75	100	12_Malvids
362	Eutrema yunnanense	0	3	33.17	0.07	1.14	0.06	0.04	0	2.93	19.28	0.16	3.06	0.05	13.86	23.16	100	12_Malvids
363	Iberis amara	0.04	7.06	16.56	0.05	1.05	0.04	0	0.03	1.53	20.44	0	3.17	0.02	15.15	34.87	100	12_Malvids
364	Iberis pinnata	0	6.22	28.72	0	0.99	0.07	0	0	0.75	21.39	0	2.58	0.18	12.68	26.41	100	12_Malvids
365	Isatis lusitanica	0	3.67	19.74	0	0.61	0.12	0.05	0	2.94	12.75	0	7.16	0	28.24	24.72	100	12_Malvids
366	Isatis tinctoria	0	5.01	17.8	0	1.01	0.13	0	0	2.8	15.04	0	5.49	0.02	23.34	29.37	100	12_Malvids
367	Kernera saxatilis	0	3.99	11.32	0	0.7	0.24	0.06	0	1.56	14.06	0.12	9.8	0	42.6	15.54	100	12_Malvids
368	Lepidium africanum	0	5.91	19.8	0	0.31	0	0	0	4.1	19.25	0	4.69	0	20.81	25.13	100	12_Malvids
369	Lepidium aucheri	0	4.65	26.16	0	0.26	0	0	0	4.71	18.16	0	3.49	0.01	15.02	27.55	100	12_Malvids
370	Sisymbrium altissimum	0	3.91	18.24	0	0.65	0.05	0	0	1.7	13.9	0	8.42	0	34.99	18.16	100	12_Malvids
371	Sisymbrium irio	0	3.05	21.9	0	0.32	0.01	0	0	1.35	10.92	0	4.81	0.08	18.8	38.76	100	12_Malvids
372	Macropodium nivale	0	3.9	27.83	0	0.42	0.27	0	0	1.45	13.61	0.05	4.87	0.07	23.69	23.85	100	12_Malvids
373	Pseudoturritis turrita	0	4.88	23.76	0	1.19	0.24	0.17	0	1.3	19.4	0.22	4.84	0	21.49	22.51	100	12_Malvids
374	Turritis glabra	0	4.08	19.03	0	0.49	0.06	0	0	4.36	16.81	0	8.1	0.07	37.81	9.19	100	12_Malvids
375	Thlaspi arvense	0.06	1.86	38.37	0	0.21	0.03	0.05	0	2.36	8.39	0.04	3.84	0.28	16.34	28.17	100	12_Malvids
376	Carica papaya	0	4.66	30.14	0.1	0.05	0	0	0.08	0.03	5.74	0.17	5.02	1.18	31.11	21.72	100	12_Malvids
377	Tarenaya hassleriana	0	1.81	26.11	0	0.65	0	0	0	0.15	12.88	0.12	4.02	0.08	31.34	22.84	100	12_Malvids
378	Santalum album	0.04	3.28	7.99	0	0.57	0	0	0	0.24	7.76	0.39	5.19	0	28.89	45.66	100	13_Super_asterids
379	Amaranthus hypochondriacus	0	7.3	8.94	0.01	0.77	0	0.01	0	0.26	8.84	0	2.81	0.04	11.99	59.03	100	13_Super_asterids
380	Carnegiea gigantea	0	4.1	29.79	0	0.85	0.06	0.07	0.14	0.46	13.74	0.02	2.52	0.08	16.37	31.79	100	13_Super_asterids
381	Lophocereus schottii	0.58	4.42	30.81	0	1.01	0	0	0	1.17	11.14	0	2.23	0.17	11.47	37.01	100	13_Super_asterids
382	Pachycereus pringlei	0	4.82	28.82	0	0.77	0	0	0.13	0.36	12.17	0.01	2.24	0.41	10.55	39.73	100	13_Super_asterids
383	Stenocereus thurberi	0.05	6.83	28.94	0	0.53	0	0	0.19	1.03	11.81	0.01	2.28	0.07	12.18	36.07	100	13_Super_asterids
384	Pereskia humboldtii	0.04	4.39	9.22	0	0.1	0	0	0	0.35	1.96	0	2.7	0.4	12.47	68.37	100	13_Super_asterids
385	Dianthus caryophyllus	0.04	2.32	14.36	0	0.52	0.05	0	0.16	0.78	8.93	0	2.73	0.07	18.02	52.02	100	13_Super_asterids
386	Silene latifolia	0	4.92	14.94	0	1.71	0	0.02	0.05	0.37	7.85	0	2.53	0.37	12.66	54.59	100	13_Super_asterids
387	Beta vulgaris	0.13	4.21	12.63	0.28	0.61	0	0.08	0.01	0.34	13.72	0.07	2.33	0.14	13.04	52.42	100	13_Super_asterids
388	Beta patula	0.08	3.73	15.12	0.01	0.47	0	0	0.11	0.42	10.07	0.01	2.04	0.08	9.37	58.49	100	13_Super_asterids
389	Bassia scoparia	0.03	4.33	18.31	0.06	0.06	0	0	0.1	0.63	12.77	0.06	3.55	0.68	18.66	40.75	100	13_Super_asterids
390	Spinacia oleracea	0	2.33	22.66	0	0.3	0	0.1	0.18	0.44	13.01	0.06	2	0.15	11.55	47.22	100	13_Super_asterids
391	Chenopodium pallidicaule	0	2.43	16.14	0.04	0.23	0	0	0.12	0.02	14.73	0.22	3.84	0.4	19.78	42.06	100	13_Super_asterids
392	Chenopodium quinoa	0	2.11	18.75	0.01	0.18	0	0.03	0	0.09	12.63	0.07	3.63	0.67	20.88	40.95	100	13_Super_asterids
393	Chenopodium suecicum	0.1	3.18	18.99	0.04	0.06	0	0.04	0.77	0.1	11.5	0.05	3.24	0.59	20.36	40.98	100	13_Super_asterids
394	Drosera capensis	0.16	2.37	18.58	0	0.62	0	0	0	0.26	4.57	0.11	3.93	1.08	19.06	49.25	100	13_Super_asterids
395	Fagopyrum esculentum	0	3.86	38.15	0.35	0.66	0.17	0.02	0	1.15	9.32	0.52	1.81	0.03	8.55	35.4	100	13_Super_asterids
396	Fagopyrum tataricum	0	5.23	20.12	0	0.16	0	0	0.03	0.35	10.59	0.77	2.71	0.06	15.54	44.44	100	13_Super_asterids
397	Nyssa sinensis	0	7.44	17.7	0	0.63	0	0.04	0.77	0.21	19.16	0.02	2.91	0.82	22.55	27.74	100	13_Super_asterids
398	Actinidia chinensis	0.05	1.29	12.53	0	1.44	0.04	0.02	0.03	0.2	13.13	0.03	3.08	0.04	16.69	51.44	100	13_Super_asterids
399	Actinidia eriantha	0.02	1.51	12.82	0	1.16	0	0	0.04	0.43	12.56	0.04	3.31	0	17.07	51.03	100	13_Super_asterids
400	Monotropa hypopitys	0	1.48	35.53	0	0.22	0	0	0	0.38	5.66	0	0.66	0.11	3.23	52.73	100	13_Super_asterids
401	Vaccinium macrocarpon	0	2.83	10.71	0.01	1.82	0	0.03	0	0.47	11.91	0	1.89	0.69	11.87	57.77	100	13_Super_asterids
402	Embelia ribes	0	1.89	17.46	0.2	0.82	0	0	0	0.26	12.32	0.17	2.84	0.07	16.38	47.6	100	13_Super_asterids
403	Primula veris	0	2.22	8.25	0.04	0.43	0	0.28	0	0.05	12.19	0.02	2.87	0.23	15.52	57.91	100	13_Super_asterids
404	Argania spinosa	0	3.16	11.73	0.12	0.84	0	0.02	0.19	0.35	5.64	0.07	4.33	0.02	24.72	48.81	100	13_Super_asterids
405	Camellia sinensis	0	1.51	19.33	0	0.22	0.01	0.12	0.1	0.74	7.21	0.02	2.83	0.76	15.33	51.83	100	13_Super_asterids
406	Andrographis paniculata	0	0.21	9.52	0	1.37	0	0	0.17	0.11	8.02	0.07	3.79	0.08	27.68	48.97	100	14_Lamiids
407	Handroanthus impetiginosus	0	0.99	10.05	0	0.07	0	0	0.02	0.91	8.65	0.08	3.83	0.06	20.21	55.13	100	14_Lamiids
408	Dorcoceras hygrometricum	0	0.21	55.56	0	0	0	0	0	1.85	2.88	0.01	0.4	0.26	3.04	35.79	100	14_Lamiids
409	Pogostemon cablin	0	1.46	15.01	0.03	0.01	0	1.08	0.03	1.57	9.21	0.07	2.88	0	14.63	54.04	100	14_Lamiids
410	Scutellaria baicalensis	0	0.33	9.7	0.39	0.01	0	0	0.01	1.42	17.31	0.05	2.81	0.03	19.55	48.39	100	14_Lamiids
411	Perilla citriodora	0	0.88	14.68	0	1.29	0	0	0.16	0.32	11.97	0	2.52	0.13	19.26	48.78	100	14_Lamiids
412	Salvia splendens	0	1.43	13.82	0.01	0.11	0	0.01	0	0.88	20.34	0.08	2.56	0.35	13.96	46.45	100	14_Lamiids
413	Genlisea aurea	0	0.63	1.1	0	0.03	0	0.04	0	0.19	5.33	0	5.71	0	51.23	35.73	100	14_Lamiids
414	Utricularia gibba	0	0.35	23.69	0.04	0	0	0.06	0	0.14	5.03	0.48	5.48	0	29.57	35.16	100	14_Lamiids
415	Lindernia brevidens	0.01	2.32	19.58	0.02	0.46	0	0	0	0.3	12.7	0.09	2.51	2.03	21.4	38.58	100	14_Lamiids
416	Olea europaea	0	1.53	38.29	0	0.33	0	0	0.15	0.4	6.41	0.19	2.03	0.59	10.99	39.09	100	14_Lamiids
417	Striga asiatica	0.04	2.11	18.47	0	0.09	0	0	0	1.58	13.77	0.02	3.5	0.04	19.74	40.64	100	14_Lamiids
418	Sesamum indicum	0.11	3.33	10.91	0.17	0.11	0	0	0	0.21	9.24	0.22	2.82	0	17.4	55.48	100	14_Lamiids
419	Penstemon barbatus	0	1.31	15.92	0.59	0.37	0	0	0.01	0.42	13.74	0.24	2.47	0.02	16.06	48.84	100	14_Lamiids
420	Cuscuta australis	0.09	4.63	13.65	0.14	0.12	0	0	0	1.2	18.25	0.11	1.49	0.06	11.05	49.21	100	14_Lamiids
421	Cuscuta campestris	0	4.27	11.39	0.34	0.23	0	0	0.09	1.54	17.28	0.09	1.62	0.39	11.32	51.43	100	14_Lamiids
422	Ipomoea batatas	0	2.27	8.71	0	2.55	0	0.01	0	0.73	12.01	0.01	2.41	0	16.89	54.42	100	14_Lamiids
423	Ipomoea nil	0.23	2.42	13.85	0	2.83	0	0.06	0	0.86	14.97	0.29	2.01	0.15	21.03	41.3	100	14_Lamiids
424	Ipomoea trifida	0.03	1.43	9.72	0	2.67	0	0	0.03	1.14	12.74	0.09	2.43	0.09	19.42	50.21	100	14_Lamiids
425	Ipomoea triloba	0.11	1.68	11.73	0.02	2.75	0	0.18	0.01	1.09	13.8	0.1	2.5	0.08	19.54	46.41	100	14_Lamiids
426	Nicotiana attenuata	0	3.36	47.23	0.1	1.78	0	0	0	1.84	16.25	0.12	1.8	0.23	9.95	17.34	100	14_Lamiids
427	Nicotiana glauca	0	2.71	62.86	0	1.02	0	0	0	1.15	10.87	0	1.48	0.09	6.91	12.92	100	14_Lamiids
428	Nicotiana knightiana	0	2.21	47.86	0	1.06	0.03	0.08	0	1.54	13.49	0.07	1.29	2.15	9.17	21.05	100	14_Lamiids
429	Nicotiana obtusifolia	0	4.4	42.79	0.12	1.95	0.03	0.04	0	2.08	16.41	0.28	1.88	0.28	10.39	19.36	100	14_Lamiids
430	Nicotiana paniculata	0	2.81	49.04	0	1.22	0.05	0	0	1.41	13.4	0.05	1.3	0.53	8.23	21.97	100	14_Lamiids
431	Nicotiana tabacum	0	2.96	49.46	0.07	1.65	0	0	0	1.58	13.13	0.05	1.62	0.18	7.68	21.63	100	14_Lamiids
432	Nicotiana undulata	0.12	3.32	49.01	0.02	1.48	0	0.07	0	1.21	13.93	0	1.32	0.16	8.33	21.03	100	14_Lamiids
433	Capsicum annuum	0	3.86	46.69	0	2.09	0	0.13	0	0.32	18.25	0.09	2.17	0.02	10.67	15.7	100	14_Lamiids
434	Capsicum baccatum	0	3.33	40.22	0	1.83	0.2	0	0	0.44	13.12	0.42	1.66	0.38	8.49	29.9	100	14_Lamiids
435	Capsicum chinense	0.02	2.99	36.71	0	1.59	0.03	0	0.03	0.33	15.55	0.05	1.66	0.63	7.91	32.49	100	14_Lamiids
436	Jaltomata sinuosa	0.06	3.98	36.87	0	2.2	0.02	0	0	0.41	19.44	0.13	1.99	0.1	8.74	26.05	100	14_Lamiids
437	Solanum arcanum	0	3.87	36.75	0	1.56	1.06	0	0.02	0.5	19.97	0.18	2.83	0.21	13.14	19.92	100	14_Lamiids
438	Solanum chilense	0	4.42	42.4	0	1.42	0.55	0	0	0.15	21.99	0.07	2.93	0.01	12.49	13.56	100	14_Lamiids
439	Solanum habrochaites	0	3.73	38.44	0	1.42	1.06	0	0.03	0.35	20.82	0.12	2.85	0	12.64	18.54	100	14_Lamiids
440	Solanum lycopersicum	0	3.97	37.03	0	1.44	1.04	0	0	0.08	21.71	0.1	2.98	0.01	14.09	17.56	100	14_Lamiids
441	Solanum pennellii	0	3.91	39.11	0	1.67	0.87	0	0	0.35	21.14	0.12	2.72	0.13	13.3	16.69	100	14_Lamiids
442	Solanum melongena	0	5.99	40.98	0	1.4	0.2	0	0	0.4	12.2	0.1	1.74	0.19	8.2	28.6	100	14_Lamiids
443	Asclepias syriaca	0	2.17	36.95	0.3	0.2	0	0	0.05	0.42	1.75	0.52	2.11	0.05	9.9	45.57	100	14_Lamiids
444	Calotropis procera	0	1.92	18.05	0	0	0	0	0	0.12	2.71	0.01	6.38	0	41.34	29.46	100	14_Lamiids
445	Rhazya stricta	0	1.25	26.54	0.01	0.14	0	0	0.14	0.31	6.04	0.18	3.62	0	15.71	46.05	100	14_Lamiids
446	Catharanthus roseus	0.03	2.22	19.49	0	0.15	0	0.31	0.22	0.13	9.13	0.11	2.42	0.09	13.5	52.21	100	14_Lamiids
447	Coffea arabica	0.02	1.72	26.07	0	0.3	0	0.09	0.05	0.43	7.88	0	2.7	0.04	13.95	46.75	100	14_Lamiids
448	Coffea canephora	0	1.94	23.3	0	0.24	0	0	0.13	0.52	8	0	2.76	0.06	14.59	48.46	100	14_Lamiids
449	Coffea eugenioides	0.09	1.45	26.35	0	0.32	0	0	0	1.01	8.01	0.07	2.63	0.01	13.41	46.67	100	14_Lamiids
450	Echium plantagineum	0	2.53	7.68	0	5.4	0	0.04	0.14	0.15	18.03	0.17	2.01	0.71	11.2	51.94	100	14_Lamiids
451	Mikania micrantha	0.05	3.38	25.85	0	0.49	0	0.13	0.15	0.52	16.95	0.02	2.07	0.33	13.31	36.73	100	15_Campanulids
452	Artemisia annua	0	3.06	24.05	0.21	0.13	0	0	0	1.03	9.44	0	2.11	0.07	15.11	44.79	100	15_Campanulids
453	Erigeron canadensis	0	3.47	5.56	0	1.29	0	0	0	1.51	6.68	0.02	2.64	0.01	18	60.83	100	15_Campanulids
454	Helianthus annuus	0.02	1.9	23.69	0.13	0.11	0	0.1	0	0.55	9	0.06	1.56	0.38	11.73	50.78	100	15_Campanulids
455	Cynara cardunculus var. scolymus	0.47	2.7	13.96	0.24	0.6	0	0.09	0.34	0.78	13.22	0.24	1.29	0.17	12.69	53.22	100	15_Campanulids
456	Lactuca sativa	0	0.84	30.18	0	0.44	0	0.22	0.02	0.12	6.42	0	1.44	1.48	10.77	48.08	100	15_Campanulids
457	Codonopsis pilosula	0.04	3.52	13.51	0	0.46	0	0.07	0.05	1.3	16.19	0.02	1.7	0.01	12.62	50.51	100	15_Campanulids
458	Platycodon grandiflorus	0	3.07	15.12	0.25	0.44	0	0	0.02	0.69	19.62	0.02	2.44	0.01	18.76	39.57	100	15_Campanulids
459	Daucus carota	0	1.24	11.02	0.07	0.29	0	0	0.06	0.29	18.35	0.16	2.97	0.05	15.73	49.78	100	15_Campanulids

## Sheet: 2f average_length
Supplementary Table 2f The average length of repeat in different plant genome
Calculation method: The actual length of each repeat sequence was list in Supplementary Table 2a, the actual number of each repeat sequence was list in Supplementary Table 2d, average length = the number of repeat / the length of repeat
NO	Species name	DIRS	LINE	LTR	PLE	SINE	Circular_dsDNA	DNA_Polymerase	Rolling_Circle	TIR	RNA	Low_complexity	Satellite	Simple_repeat	Unknown	species_type
1	Chloropicon primus	0	0	149.81	0	0	0	0	0	247.36	0	53.1	0	39.26	386.66	01_Alage
2	Edaphochlamys debaryana	476.96	364.65	437.26	550.21	196.83	0	0	279.45	275.39	0	56.59	0	57.17	197.57	01_Alage
3	Bathycoccus prasinos	0	0	102.96	531.62	0	0	719.64	0	97.77	0	55.5	0	39.08	457.79	01_Alage
4	Ostreococcus tauri	0	113.5	0	0	0	0	0	1477.58	306.29	0	54.82	450.75	59.93	298.48	01_Alage
5	Micromonas	1748.34	253.19	1954.6	281.14	0	880.17	0	2028.04	898.81	0	56.66	0	59.47	565.32	01_Alage
6	Micromonas commoda	0	0	128.11	0	0	0	0	169.94	0	0	45.3	0	43.96	109.81	01_Alage
7	Micromonas pusilla	0	0	101.57	0	0	0	98.21	0	292.55	0	55.19	0	50.13	261.75	01_Alage
8	Bathycoccus	0	0	241.83	0	0	75.71	0	0	118.53	0	53.02	0	53.57	162.27	01_Alage
9	unclassified Mamiellophyceae	119.58	304.55	353.54	160.7	95	306.16	111.64	0	169.38	0	53.57	265.94	37.55	141.04	01_Alage
10	Cymbomonas tetramitiformis	0	0	0	0	0	0	0	0	0	0	48.58	0	43.86	183.92	01_Alage
11	Chlamydomonas	741.94	500.18	410.19	384.77	209.59	187.26	582.66	252.15	219.52	0	53.12	218.03	48.88	234.96	01_Alage
12	Chlamydomonas applanata	0	192.42	967.19	0	90.17	0	0	82.74	174.13	0	58.56	0	56.46	145.05	01_Alage
13	Chlamydomonas applanata	278.35	185.84	298.98	0	0	140.32	0	0	114.19	0	56.65	0	50.27	155.7	01_Alage
14	Chlamydomonas asymmetrica	89.92	267.72	365.17	498.42	0	0	0	884.9	202.7	0	49.12	62.78	45.1	217.4	01_Alage
15	Chlamydomonas debaryana	614.88	401.81	508.93	0	160.86	0	0	257.57	271.99	0	56.61	0	57.15	186.92	01_Alage
16	Chlamydomonas eustigma	0	295.86	470.08	0	0	0	269.46	296.26	214.14	0	55.53	0	43.92	232.01	01_Alage
17	Chlamydomonas reinhardtii	201.52	283.25	351.03	494.4	362.19	0	86.64	210.12	204.57	101.09	61.61	1086.2	57.85	174.13	01_Alage
18	Chlamydomonas sphaeroides	496.8	347.45	551.78	605.52	137.42	0	0	150.65	210.54	0	56.9	0	58.13	185.58	01_Alage
19	Chloromonas	163.8	158.29	327.93	0	58.78	272.89	267.79	0	155.59	253.6	54.21	342.32	53.14	136.72	01_Alage
20	Eudorina	1261.38	677	730.89	518.09	649.88	0	424.06	1226.86	609.01	3981.79	62.97	465.51	77.45	247.24	01_Alage
21	Gonium pectorale	555.19	263.38	438.25	378.57	203.76	0	0	278.47	254.85	0	57.5	0	54.29	192.66	01_Alage
22	Volvox carteri	829.58	301.85	454.15	205.62	341.87	168.97	449.55	406.9	209.58	453.11	55.57	284.28	52.37	271.66	01_Alage
23	Yamagishiella unicocca	944.9	594.2	474.2	498.02	417.5	0	0	877.96	776.57	955.63	63.1	1068.06	65.97	377.81	01_Alage
24	Haematococcus	0	155.17	167.87	159.06	193.32	161.47	0	0	168.47	0	61.5	142.06	52.01	125.97	01_Alage
25	Haematococcus lacustris	189.38	255.35	350.69	290.43	343.61	160.84	89.26	193.96	278.21	0	62.42	150.07	65.31	254.17	01_Alage
26	Characiochloris	129.64	186.51	248.49	77.55	56.15	0	157.72	0	126.13	849.88	54.03	155.95	49.56	134.7	01_Alage
27	Dunaliella	0	168.42	192.3	0	0	0	0	0	125.03	0	51.22	0	43.86	149.47	01_Alage
28	Dunaliella salina	489.23	431.18	397.23	207.39	144.77	59.03	0	348.1	209.86	76.21	62.8	277.29	65.98	229.21	01_Alage
29	Tetrabaena socialis	0	256.14	303.13	437	0	0	0	280.06	223.36	0	54.73	299.17	59.59	173.15	01_Alage
30	Mychonastes homosphaera	0	0	951.44	0	0	0	0	0	134.94	0	52.71	0	57.41	146.74	01_Alage
31	Messastrum gracile	0	187.93	706	0	0	0	0	0	152.99	0	54.72	603.5	53.71	206.74	01_Alage
32	Monoraphidium	0	188.42	206.82	83.45	137.32	142.61	684.06	0	170.1	0	50.53	0	45.63	139.1	01_Alage
33	Monoraphidium neglectum	0	228.02	93.91	0	0	0	0	0	149.85	0	52.63	0	59.69	199.24	01_Alage
34	Raphidocelis subcapitata	188.25	117.6	212.15	0	0	0	0	0	252	0	57.35	0	62.37	236.49	01_Alage
35	Desmodesmus armatus	2002.68	289.32	824.96	241.95	804.43	180.25	537.26	231.38	603	2283.09	58.08	116.01	48.86	482.47	01_Alage
36	Scenedesmus	398.38	188.84	181.76	0	174.22	219.19	0	324.6	208.05	0	51.02	243.43	62.15	122.87	01_Alage
37	Scenedesmus quadricauda	0	216.11	161.06	0	64.7	0	0	0	135.73	133.59	54.32	0	60.78	150.74	01_Alage
38	Scenedesmus vacuolatus	0	151.67	188.85	0	0	0	0	0	0	0	51.53	0	44.29	73.36	01_Alage
39	Coelastrella	0	136.59	214.04	0	88.34	0	0	0	456.99	0	48.76	0	44.69	128.94	01_Alage
40	Tetradesmus obliquus	512.02	186.31	358.63	0	0	226.66	200.61	473.04	276.92	0	51.3	0	75.75	159.68	01_Alage
41	Tetraselmis striata	1433.98	677.18	1054.57	461.87	327.48	724.06	1676.97	257.94	480.45	381.49	51.16	855.52	39.82	452.46	01_Alage
42	Picocystis	628.78	1308.01	1971.54	0	459.28	1336.85	427.73	0	1555.87	3048.33	63.67	0	48.62	673.62	01_Alage
43	Ulva mutabilis	915.34	712.82	1745.36	393.64	123.03	0	0	780.91	333.8	0	51.23	0	68.33	354.71	01_Alage
44	Ulva prolifera	1453.89	611	1441.13	788.12	1291.61	0	0	1826.49	354.61	1154.45	53.27	1791.04	55.55	349.73	01_Alage
45	Parachlorella kessleri	0	191.62	694.88	0	0	103.94	0	1378.1	117.73	0	50.73	0	45.72	128.44	01_Alage
46	Helicosporidium	0	0	0	0	0	0	0	0	0	0	50.7	132.07	45.26	237.59	01_Alage
47	Auxenochlorella pyrenoidosa	0	277.59	226.85	0	0	0	0	0	409.36	0	52.4	0	50.04	158.42	01_Alage
48	Auxenochlorella protothecoides	0	953.47	0	0	0	0	0	0	533.14	120.41	47.8	0	47.75	445.71	01_Alage
49	Micractinium conductrix	768.81	331.83	732.22	0	310.11	0	0	307.99	616.97	0	56.29	0	54.44	503.81	01_Alage
50	Chlorella sorokiniana	0	397.29	492.35	0	314.31	0	0	0	214.22	0	50.71	0	51.62	471.53	01_Alage
51	Chlorella variabilis	0	382.41	385.6	0	0	0	0	214.84	437.42	0	55.16	0	52.95	324.13	01_Alage
52	Chlorella vulgaris	0	186.14	497.22	0	0	0	0	0	198.96	0	54.42	0	48.17	239.78	01_Alage
53	Prototheca bovis	0	0	0	0	0	0	0	0	312.59	0	66.85	962.24	55.84	439.58	01_Alage
54	Prototheca ciferrii	0	0	0	0	459.46	0	0	0	206.6	0	59.76	0	50.48	475.28	01_Alage
55	Prototheca cutis	0	1124.57	130.18	0	0	0	0	0	675.03	0	44.41	0	41.67	636.27	01_Alage
56	Prototheca stagnorum	0	0	0	0	0	80.56	0	0	0	0	60.05	0	56.68	297.47	01_Alage
57	Prototheca wickerhamii	0	265.5	1064.48	0	126.9	0	0	0	0	0	50.11	0	50.1	357.75	01_Alage
58	Prototheca zopfii	0	0	384.41	0	149.06	93.7	0	0	326.12	0	67.16	145.31	55.84	372.14	01_Alage
59	Chloroidium	0	362.91	0	0	0	0	0	0	0	0	45.41	0	37.6	208.46	01_Alage
60	Chlorella	0	365.52	77.61	0	0	0	0	0	713.38	0	62.29	0	58.98	262.12	01_Alage
61	Picochlorum	0	645.27	0	0	0	0	0	0	205.39	0	51.89	0	37.74	237.4	01_Alage
62	Botryococcus braunii	1070.13	474.73	1346	839.32	0	231.17	0	736.57	170.47	923.63	75.12	156.25	92.9	280.93	01_Alage
63	Coccomyxa	0	202.96	656.48	0	0	0	0	0	297.88	0	48.6	0	45.19	205.32	01_Alage
64	Coccomyxa subellipsoidea C-169	0	756.11	748.16	0	0	0	0	0	834.86	1472.54	49.67	0	49.56	129.39	01_Alage
65	unclassified Trebouxiophyceae	153.7	281.77	287.77	0	0	65.79	0	0	106.77	0	57.89	89.91	49.44	212.79	01_Alage
66	Trebouxia	0	165.41	191.54	0	0	0	0	189.71	90.49	81.64	52.29	0	50.28	124.34	01_Alage
67	Trebouxia gelatinosa	350.97	223.19	408.82	0	0	0	0	333.89	431.14	0	47.84	0	49.46	187.62	01_Alage
68	Chlorokybus atmophyticus	460.53	606.78	1556.85	0	255.05	415.81	0	0	303.3	0	59.83	409.5	54.78	488.85	01_Alage
69	Mesostigma viride	395.63	309.19	462.53	399.67	0	0	110.99	182.24	186.8	0	55.67	208	61.5	210.28	01_Alage
70	Klebsormidium nitens	1174.78	335.47	639.49	0	0	0	0	0	818.92	347.34	52.68	0	46.25	210.52	01_Alage
71	Chara braunii	408.61	816.62	1039.62	694.5	145.87	335.08	333.36	303.95	316.85	201.07	73.96	202.89	52.77	267.54	01_Alage
72	Mesotaenium endlicherianum	727.79	465.38	1728.28	548.79	57.17	0	551.14	141.23	298.48	0	68.47	177.68	52.73	724.12	01_Alage
73	Physcomitrella patens	0	989.43	1672.09	0	57.55	0	0	389.74	211.51	1087.03	52.28	203.04	40.79	447.08	02_Bryophyte
74	Pleurozium schreberi	186.99	406.83	592.72	621.31	269.08	0	197.96	278.18	377.75	620.19	51.12	467.62	41.15	272.91	02_Bryophyte
75	Marchantia inflexa	0	279.85	438.46	342.71	192.55	0	187.03	413.99	280.72	0	50.57	334.79	40.57	234.08	02_Bryophyte
76	Marchantia polymorpha	296.84	1005.46	843.79	349.05	163.56	728.7	0	796.82	566.04	136.66	53.48	236	40	464.21	02_Bryophyte
77	Selaginella kraussiana	285.32	267.2	304.64	354.45	106.51	0	380.75	247.05	363.41	155.95	53.01	0	44.91	194.57	03_Lycophytes
78	Selaginella moellendorffii	0	677.38	1013.47	619.2	354.59	908.14	260.29	382.29	1030.99	963.52	48.52	829.24	46.94	539.28	03_Lycophytes
79	Selaginella tamariscina	282.19	353.22	1161.13	348.07	234.19	102.25	305.82	573.27	286.45	536.5	54.76	233.64	44.65	592.98	03_Lycophytes
80	Adiantum capillus-veneris	0	823.49	1018.42	849.97	200.78	105.99	346.4	1276.69	484.15	0	70.1	187.13	45.85	452.35	04_Fern
81	Azolla filliculoides	0	610.49	1502.03	713.38	533.05	0	230.67	224.66	649.95	845.76	60.4	285.68	51.03	487.17	04_Fern
82	Salvinia cucullata	0	484.53	921.11	0	375.02	0	568.7	165.94	401.38	1438.81	51.75	1223.41	41.53	375.95	04_Fern
83	Gnetum montanum	0	569.33	1725.14	199.66	124.38	0	184.36	573.49	460.02	1499.34	60.26	581.49	43.03	468.64	05_Gymnosperms
84	Sequoiadendron giganteum	0	1122.38	1412.96	665.95	190.35	691.78	170.87	995.35	795.55	3088.81	68.54	660.6	60.26	560.81	05_Gymnosperms
85	Amborella trichopoda	0	515.26	902.14	0	110.99	0	259.3	394.57	274.99	204.07	60.09	76.76	59.3	240.65	06_ANA
86	Nymphaea colorata	582.38	511.54	1064.65	408.1	220.59	267.51	498.68	679.19	351.86	1009.88	53.55	225.14	41.75	243.42	06_ANA
87	Cinnamomum micranthum	572.2	386.33	892.83	0	140.58	187.33	299.68	414.12	302.94	406.63	52.25	309.12	36.59	271.2	07_Magnoliids
88	Persea americana	249	398.56	1011.02	100.96	108.19	196.43	363.69	473.21	402.67	62.25	52.33	282.11	36.1	303.18	07_Magnoliids
89	Liriodendron chinense	201.2	464.61	1374.71	0	80.39	0	458.63	470.48	343.79	718.45	50.49	79.07	41.53	301.75	07_Magnoliids
90	Magnolia ashei	320.46	321.83	355.4	0	71.01	0	288.52	263.1	230.71	140.15	47.72	222.46	37.15	192.76	07_Magnoliids
91	Spirodela polyrhiza	81.01	829.06	730.07	298.65	0	0	0	1074.45	473.11	0	62.9	1590.94	42.05	473.56	08_Monocots
92	Zostera marina	0	501.53	1082.5	891.23	228.27	0	0	753.63	495.68	211.37	51.04	546.47	43.5	408.8	08_Monocots
93	Dioscorea alata	192.88	609.53	941.64	263.72	93.36	124.09	0	1085.57	393.48	760.89	51.89	319.26	83.92	327.08	08_Monocots
94	Dioscorea rotundata	260.93	861.2	1002.76	210.48	302.28	271.86	0	843.57	465.03	227.53	52.44	397.71	42	325.26	08_Monocots
95	Trichopus zeylanicus	425.2	908.83	1081.72	0	1828.9	0	587.13	1434.25	853.19	1191.45	58.73	649.37	274.49	439.94	08_Monocots
96	Xerophyta viscosa	0	315.52	643.28	130.02	143.94	314.71	368.91	480.15	322.36	269.38	48.32	411.9	44.15	255.98	08_Monocots
97	Asparagus officinalis	0	579.56	1064.51	178.02	124.99	849.76	460.62	615.27	378.45	0	53.82	94.12	60.52	371.02	08_Monocots
98	Apostasia shenzhenica	144.26	374.45	556	0	123.67	0	378.99	428.55	309	400.28	64.97	830.39	49.16	319.79	08_Monocots
99	Gastrodia elata	0	663.63	1294.27	0	88.98	0	0	977.68	831.48	637.43	57.44	268.98	48.74	548.81	08_Monocots
100	Dendrobium catenatum	0	691.5	760.93	184.92	158.75	0	333.47	454.58	280.03	0	54.95	332.33	47.58	290.15	08_Monocots
101	Phalaenopsis aphrodite	410.3	734.6	1177.42	0	118.86	0	0	405.07	391.56	0	61.2	1890.51	49.38	395.1	08_Monocots
102	Phalaenopsis equestris	312.91	554.41	972.23	0	0	0	0	318.08	377.34	0	61.49	1389.22	47.36	335.98	08_Monocots
103	Vanilla planifolia	0	644.17	598.28	388.61	122.47	0	0	297.71	320.02	402.43	114.44	0	73.11	425.76	08_Monocots
104	Cocos nucifera	0	556.17	969.2	0	121.03	443.55	538.23	811.93	519.7	0	55.02	469.86	49.5	405.16	08_Monocots
105	Elaeis guineensis	277	641.91	1167.36	0	133.36	427.43	0	1326.85	478.32	0	54.29	463.97	45.65	431.03	08_Monocots
106	Elaeis oleifera	127.73	484.87	1179.87	0	145.85	288.34	452.44	1197.7	474.28	77.16	55.05	515.15	43.35	340.37	08_Monocots
107	Calamus simplicifolius	357.45	914.13	1770.79	286.57	207.96	170.36	0	1215.62	702.13	202.49	54.45	498.69	42.87	420.28	08_Monocots
108	Ananas comosus	449.38	367.63	790.93	156.43	95.97	0	365.55	452.73	412.67	257.7	61.96	336.01	42.64	344.01	08_Monocots
109	Raddia distichophylla	0	546.43	604.92	180.66	211.51	0	157.72	275.75	253.62	239.21	54.27	3022.82	48.82	244.39	08_Monocots
110	Leersia perrieri	0	398.11	581.88	0	162.68	0	0	193.35	219.41	227.9	50.62	1274	44.05	277.88	08_Monocots
111	Oryza barthii	0	334.3	683.75	0	148.03	0	0	238.7	219.26	263.71	50.43	278.91	42.33	508.61	08_Monocots
112	Oryza brachyantha	0	291.74	577.97	0	138.39	0	0	176.91	210.92	0	49.81	195.38	42.53	249.95	08_Monocots
113	Oryza glaberrima	0	340.76	740.5	0	122.86	0	0	222.11	216.11	405.55	51.11	613.92	43.82	540.25	08_Monocots
114	Oryza glumipatula	0	333.79	568.48	0	133.46	109.13	0	232.98	211.2	0	51.38	982.94	43.98	524.59	08_Monocots
115	Oryza longistaminata	0	322.25	664.6	0	150.46	0	0	213.64	203.11	288.88	50.62	273.24	44.29	404.02	08_Monocots
116	Oryza meridionalis	0	343.4	406.03	0	125.44	421.39	0	192.15	193.14	0	50.75	406.42	43.67	464.6	08_Monocots
117	Oryza meyeriana var. granulata	0	498.62	1746.31	0	132.99	0	0	254.81	386.49	633.13	62.73	318.56	50.38	531.12	08_Monocots
118	Oryza punctata	0	418.15	1084.11	0	150.96	0	0	289.7	293.9	0	50.95	500.27	43.42	489.16	08_Monocots
119	Oryza rufipogon	0	338.93	528.94	0	123.84	0	0	247.21	216.67	0	51.51	705.91	46.26	426.96	08_Monocots
120	Oryza sativa	0	377.89	1133.49	0	133.81	0	0	243.39	267.42	363.32	51.17	1185.75	54.04	1044.84	08_Monocots
121	Oryza sativa f. spontanea	754.97	363.09	606.49	0	133.99	0	0	252.42	222.06	223.79	50.83	1199.98	45.06	448.66	08_Monocots
122	Zizania latifolia	0	598.16	1036.05	144.25	138.98	0	0	172.73	284.41	0	80.59	150.7	61.37	353.17	08_Monocots
123	Brachypodium distachyon	2182.21	473.85	1390.6	509.01	170.37	361.69	0	220.93	229.28	839.11	50.57	873.93	44.1	311.4	08_Monocots
124	Dactylis glomerata	0	405.52	264.26	0	122.65	0	0	143.84	213.93	0	51.53	391.6	46.02	203.45	08_Monocots
125	Lolium perenne	0	358.97	274.08	0	139.38	0	0	129.33	189.24	0	59.22	450.53	45.36	206.44	08_Monocots
126	Hordeum pubiflorum	0	455.14	330.65	0	171.7	0	278.1	245.66	244.96	0	56.15	205.78	56.98	269.03	08_Monocots
127	Hordeum vulgare	0	795.85	2238.13	0	188.79	0	0	190.36	556.74	916.48	78.27	1320.48	55.41	444.27	08_Monocots
128	Aegilops tauschii	0	807.26	2275.39	0	113.24	0	1892.11	771.55	873.39	3324.66	74.73	502.92	54.97	578.62	08_Monocots
129	Triticum aestivum	293.69	656.09	2305.36	0	132.21	0	948.8	509.52	715.39	297.88	58.35	3203.09	47.83	545.99	08_Monocots
130	Triticum dicoccoides	0	709.43	2283.27	0	292.53	0	0	642.29	681.36	0	58.93	2528.67	48.89	623.96	08_Monocots
131	Triticum urartu	0	736.57	2453.48	575.16	123.53	0	1836.53	458.9	648.88	0	63.12	351.87	48.89	701.7	08_Monocots
132	Eleusine coracana	0	462.73	598.05	0	185.2	0	0	181.68	316.91	359.09	49.42	659.53	46.14	275.89	08_Monocots
133	Eleusine indica	255.45	383.08	716.7	0	164.48	0	0	153.7	288.47	0	49.24	998.5	41.18	325.84	08_Monocots
134	Oropetium thomaeum	130.02	439.7	1565.45	0	141.39	0	0	386.4	363.69	2010.03	47.97	0	39.41	368.01	08_Monocots
135	Eragrostis curvula	0	516.84	1339.41	721.61	200.88	0	0	341.29	334	233.71	48.44	0	41.98	428.24	08_Monocots
136	Eragrostis tef	0	324.58	364.96	0	174.11	0	0	192.84	206.09	171.43	46.83	0	44.84	208.57	08_Monocots
137	Sporobolus alterniflorus	0	698.78	837.72	0	120.19	0	0	252.23	300.24	0	49.09	1178.36	42.32	394.35	08_Monocots
138	Zoysia japonica	0	431.72	1045.03	0	136.51	0	0	192.53	253.03	0	48.86	2280.65	47.2	276.6	08_Monocots
139	Zoysia matrella	0	495.41	1238.21	0	147.49	0	425.45	218.09	274.48	0	48.31	2462.45	43.09	321.97	08_Monocots
140	Zoysia pacifica	0	488.09	1075.05	0	132.73	381.56	0	186.01	244.19	0	48.57	1825.89	43.59	296.19	08_Monocots
141	Coix aquatica	0	621.47	2247.13	0	163.26	0	0	289.31	428.91	1874.1	61.81	0	47.64	773.28	08_Monocots
142	Miscanthus sacchariflorus	0	357.31	577.18	0	148.15	0	0	179.67	249.93	0	50.45	924.45	43.11	451.18	08_Monocots
143	Saccharum hybrid cultivar	4722.62	449.26	1365.75	0	162.26	0	0	191.17	264.63	2095.66	51.79	3092.47	45.27	414.34	08_Monocots
144	Saccharum spontaneum	0	450.42	1401.27	0	163.43	0	530.08	212.38	286.9	0	52.7	6874.12	47.18	448.08	08_Monocots
145	Sorghum bicolor	253.85	455.11	1885.34	0	155.93	0	0	189.9	305.35	2855.59	53.1	3396.13	48.16	931.48	08_Monocots
146	Zea mays	0	572.36	2513.88	0	179.95	0	0	278.32	362.61	0	55.99	739.66	49.47	964.16	08_Monocots
147	Alloteropsis semialata	0	645.59	1580.93	0	209.63	0	441.12	383.69	397.87	1243.71	53.94	2160.47	48.16	403.26	08_Monocots
148	Echinochloa crus-galli	0	442.83	650.12	0	162.5	0	189.54	208.24	256.89	428.36	52.94	2400.33	54.77	265.13	08_Monocots
149	Cenchrus americanus	0	914.18	1656.35	0	211.4	0	0	345.04	407.39	0	52	160.41	47.03	402.51	08_Monocots
150	Setaria italica	0	490.8	1267.11	0	163.42	0	0	505.79	363.93	0	52.71	2167.85	48.71	520.9	08_Monocots
151	Setaria viridis	0	515.14	1313.63	727.93	117.03	0	0	449.68	360.84	0	54.05	7401.67	47.47	416.64	08_Monocots
152	Dichanthelium oligosanthes	0	319.64	824.26	0	132.7	345.93	0	221.34	305.58	0	51.66	285.3	58.54	354.44	08_Monocots
153	Urochloa ruziziensis	0	464.22	635.86	0	164.7	0	0	202.31	284.84	0	52.11	360.79	43.86	261.05	08_Monocots
154	Panicum miliaceum	0	498.45	1748.21	0	162.83	0	0	281.88	312.37	374.67	53.57	14101.2	44.1	633.51	08_Monocots
155	Panicum hallii	0	508.96	2271.64	0	152.68	0	0	318.3	389.13	1370.32	58.21	7282.33	49.03	737.84	08_Monocots
156	Eichhornia paniculata	296.86	543.18	556.18	0	114.62	0	183.66	374.98	330.27	189.13	50.55	209.84	44.97	314.04	08_Monocots
157	Musa acuminata	0	474.33	953.13	0	110.06	0	193.17	377.94	476.54	68.61	51.45	189.59	42.3	401.15	08_Monocots
158	Musa balbisiana	0	518.33	1359.39	1283.83	284.07	97.05	0	698.29	484.93	2280.2	55.53	193.27	112.05	389.21	08_Monocots
159	Musa itinerans	0	379.24	806.73	145.38	114.96	0	0	468.88	400.07	361.87	52.17	221.41	41.66	278.17	08_Monocots
160	Musa schizocarpa	148.21	777.2	1421.33	151.92	121.32	0	0	552.87	567.89	1410.89	52.01	4809.73	54.03	362.77	08_Monocots
161	Berberis thunbergii	270.1	669.1	1054.95	0	606.71	870.32	0	649.93	412.15	384.74	49.86	0	40.56	305.64	09_Base_eudicots
162	Eschscholzia californica	315.61	770.08	592.18	217.79	306.99	154.43	217.79	316.53	311.13	205.88	52.27	181.58	42.21	260.71	09_Base_eudicots
163	Macleaya cordata	0	532.31	764.74	0	146.4	179.73	253.12	438.69	283.74	0	50.36	595.57	39.22	243.1	09_Base_eudicots
164	Papaver somniferum	0	792.91	1457.45	0	171.43	378.94	678.04	643.8	749.82	288.53	48.18	452.99	135.51	414.08	09_Base_eudicots
165	Aquilegia coerulea	0	480.11	1307.07	0	178.81	235.6	312.38	786.37	451.99	654.54	48.44	314.72	40.18	403.17	09_Base_eudicots
166	Nelumbo nucifera	0	504.59	847.46	0	120.61	144.58	242.71	429.47	287.78	163.27	51.38	271.74	41.04	225.57	09_Base_eudicots
167	Macadamia integrifolia	0	635.39	1278.54	318.26	133.1	93.44	222.55	638.75	333.47	1385.86	94.76	166.31	37.61	264.51	09_Base_eudicots
168	Kalanchoe fedtschenkoi	0	669.16	557.64	0	154.14	0	0	516.83	306.42	508.31	50.58	337.39	41.99	275.03	10_Super_rosids
169	Sedum album	574.52	824.81	1050.01	374.71	392.36	466.94	356.2	585.93	379.12	1876.6	50.05	616.88	49.8	312.48	10_Super_rosids
170	Cissus quadrangularis	0	211.81	217.42	0	111.48	0	0	330.84	209.72	131.8	47.58	168.33	36.87	142.49	10_Super_rosids
171	Vitis aestivalis	0	245.49	229.64	0	70.98	0	0	267.77	211.48	150.5	52.32	131.49	41.11	181	10_Super_rosids
172	Vitis cinerea x Vitis riparia	0	497.46	470.32	0	189.64	0	0	589.62	258.72	264.95	49.95	494.75	39.6	270.19	10_Super_rosids
173	Vitis riparia	316.62	737.16	866.67	356.97	123.73	0	833.87	537.8	327.13	0	50.67	0	40.63	304.64	10_Super_rosids
174	Vitis vinifera	708.48	736.19	794.24	0	134.1	0	0	630.81	339.71	181.92	51.03	2536.62	47.48	349.34	10_Super_rosids
175	Vitis x labruscana x Vitis vinifera	370.35	876.1	890.27	0	136.72	0	0	975.84	354.37	496.27	51.95	357	42.7	365.97	10_Super_rosids
176	Aristotelia chilensis	0	304.71	254.53	0	0	0	0	258.63	157.22	0	46.08	0	37.35	132.24	11_Fabids
177	Cephalotus follicularis	0	680.91	1411.28	814.64	222.47	555.08	775.33	358.88	641.29	0	60.84	221.12	47.21	528.92	11_Fabids
178	Populus simonii	0	668.47	694.19	92.5	172.36	0	0	436.4	519.6	713.97	50.12	292.33	39.34	290.1	11_Fabids
179	Salix brachista	47.69	937.9	698.15	0	319.28	461.02	0	334.36	395.75	273.26	49.91	0	42.74	332.08	11_Fabids
180	Caryocar brasiliense	0	553.22	629.06	447.7	0	348.62	0	299.49	336.06	177.32	50.02	212.38	40.09	293.36	11_Fabids
181	Ricinus communis	377.83	347.52	1005.3	253.31	289.39	0	0	450.39	410.29	629.14	50.11	2366.68	44.13	417.12	11_Fabids
182	Jatropha curcas	0	417.54	611.81	251.02	107.21	0	0	310.32	338.81	154.66	50.04	0	38.46	265.28	11_Fabids
183	Manihot esculenta	874.73	561.12	1117.71	350.18	121.58	0	0	848.93	379.48	0	53.53	0	43.44	414.51	11_Fabids
184	Hevea brasiliensis	270.24	741.33	1498.62	0	126.31	0	0	194.66	372.11	557.48	53.79	0	45.75	489.41	11_Fabids
185	Linum usitatissimum	0	475.88	611.39	555.17	104.98	423.4	159.75	924.46	347.55	165.31	50.02	379.6	39.98	234.83	11_Fabids
186	Passiflora edulis	0	388.03	234.45	0	93.39	0	0	290.39	233.15	207.89	46.81	0	36.7	185.12	11_Fabids
187	Rhizophora apiculata	833.44	384.84	999.57	0	201.85	0	0	681.91	474.29	698.17	49.55	4192.31	64.5	404.14	11_Fabids
188	Populus alba	0	724.5	766.69	376.45	170.81	149.74	0	399.47	423.22	1199.17	49.58	104.33	39.99	278.85	11_Fabids
189	Populus euphratica	543.97	718.04	785.75	0	164.51	0	393.07	428.54	529.09	1520.07	50.17	343.85	41.65	264.08	11_Fabids
190	Populus trichocarpa	0	773.61	633.46	0	173.81	444.23	0	410.33	531.1	1054.17	49.38	615.72	38.56	293.12	11_Fabids
191	Glycine tomentella	0	528.24	934.9	0	191.58	749.65	164.5	886.9	406.29	122.89	52.17	0	42.76	280.49	11_Fabids
192	Carpinus fangiana	0	649.69	635.29	158.28	290.87	0	175.14	763.26	283.65	236.59	48.18	664.32	35.24	250.42	11_Fabids
193	Chamaecrista fasciculata	0	443.87	734.09	945.58	153.73	0	0	329.19	243.17	336.12	50.93	176.3	42.25	256.58	11_Fabids
194	Vachellia collinsii	0	480.47	665.95	0	171.1	434.62	579.93	529.01	544.7	69.9	48.84	258.76	36.4	250.27	11_Fabids
195	Mimosa pudica	0	367.41	668.01	0	143.92	0	0	418.39	247.79	73.81	49.82	700.94	41.74	228.25	11_Fabids
196	Prosopis alba	354.46	711.26	1312.43	0	127.03	0	0	646.4	432.16	1270.7	48.43	158.93	40.46	282.98	11_Fabids
197	Cercis canadensis	476.22	469.06	770.41	1109.97	147.26	0	0	616.72	354.43	871.39	48.72	294.23	39.37	248.07	11_Fabids
198	Nissolia schottii	0	475.47	551.69	0	126.22	332.58	176.78	469.58	296.91	656.11	50.38	959.84	42.75	290.33	11_Fabids
199	Arachis duranensis	0	722.54	1194.74	0	190.22	0	207.79	400.55	357.6	0	91.52	899.01	52.81	275.3	11_Fabids
200	Arachis hypogaea	0	828.37	1701.66	398.64	172.11	179.81	227.2	775.28	384.71	317.22	83.36	0	56.03	303.63	11_Fabids
201	Arachis ipaensis	0	667.59	1305.18	0	196.8	0	0	616.29	389.29	0	83.86	0	50.77	330.98	11_Fabids
202	Arachis monticola	0	825.46	1492.52	115.03	178.7	0	331.94	652.67	359.66	255.56	73.06	0	53.53	272.22	11_Fabids
203	Lupinus angustifolius	0	476.82	835.53	0	119.61	0	0	420.38	308.39	598.56	50.72	394.32	128.59	271.04	11_Fabids
204	Cicer arietinum	0	276.61	791.67	0	114.61	545.52	189.04	372.06	412.54	556.21	54.43	1703.56	51.54	298.89	11_Fabids
205	Cicer echinospermum	0	490.53	1105.94	176.16	132.62	654.33	528.54	448.83	505.86	865.09	53.35	1412.85	53.13	294.72	11_Fabids
206	Cicer reticulatum	0	596.1	649.21	0	194.97	0	0	506.44	312.93	238.5	52.19	2484.98	49.58	262.1	11_Fabids
207	Vicia faba	965.36	550.32	516.37	149.52	192.78	594.44	835.03	744.55	479.89	361.52	50.62	280.9	41.42	414.78	11_Fabids
208	Medicago truncatula	212.12	369.4	540.61	0	105.63	0	132.97	364.91	219.76	376.45	49.43	172.54	40.89	186.36	11_Fabids
209	Trifolium subterraneum	336.1	435.5	577.94	369.14	116.94	0	150.01	271.4	206.69	193.21	50.14	308.82	47.64	220.79	11_Fabids
210	Lotus japonicus	0	444.13	535.26	0	136.01	0	0	479.04	239.93	0	51.03	308.63	44.52	256.85	11_Fabids
211	Abrus precatorius	0	629.8	916.15	0	444.48	0	357.4	539.44	496	4183	53.3	1185.27	45.08	338.55	11_Fabids
212	Cajanus cajan	393.35	371.77	541.6	413.35	128.04	401.29	0	449.29	305.32	156.43	52.13	365.71	43.77	307.02	11_Fabids
213	Glycine max	0	536.79	1299.46	41.7	166.88	190.72	0	653.11	414.01	1846.75	51.86	1554.83	46.12	241.87	11_Fabids
214	Glycine soja	188.65	491.85	879.86	0	185.22	319.34	0	767.27	409.03	220.82	52.83	1667.35	46.82	201.36	11_Fabids
215	Mucuna pruriens	0	306.53	673.93	179.39	237.44	244.02	0	736.64	283.12	0	53.76	174.47	48.02	310.66	11_Fabids
216	Phaseolus vulgaris	986.71	652.81	944.3	0	127.63	0	0	664.89	439.86	0	54.47	240.55	53.77	350.5	11_Fabids
217	Spatholobus suberectus	0	480.25	784.42	594.99	121.48	332.74	0	579.63	328.11	678.32	52.66	0	44.12	294.8	11_Fabids
218	Vigna angularis	0	566.56	515.44	203.23	171.64	0	347.5	510.02	365.45	436.95	55.29	267.08	85.08	273.55	11_Fabids
219	Vigna radiata	0	316.24	672.4	0	115.9	0	0	768.72	424.05	352.7	56.14	211.94	50.62	279.65	11_Fabids
220	Vigna unguiculata	0	449.22	877.48	0	120.99	0	578.71	805.9	432.24	2806.78	60.47	459.99	67.68	328.78	11_Fabids
221	Quillaja saponaria	358.71	387.68	536.44	0	208.3	0	456.05	554.7	541.24	186.35	47.21	330.42	38.05	287.73	11_Fabids
222	Cannabis sativa	305.4	771.25	1829.64	0	97.43	646.01	512.8	708.28	481.81	0	53.2	274.02	46.37	359.21	11_Fabids
223	Humulus lupulus	0	835.96	930.41	289.44	409.13	0	244.14	342.56	502.15	0	52.52	0	47.9	435.19	11_Fabids
224	Parasponia andersonii	0	572.59	1357.67	0	278.7	0	186.98	620.12	624.33	0	48.8	408.86	37.47	438.86	11_Fabids
225	Trema orientale	0	569.17	959.48	0	301.38	606.64	419.92	591.97	382.16	0	48.96	230.37	37.07	286.16	11_Fabids
226	Artocarpus camansi	0	543.26	542.53	426.92	224.69	0	0	598.36	322.84	191.34	49.19	317.8	35.63	244.67	11_Fabids
227	Ficus carica	0	362.92	364.4	652.38	132.42	0	131.47	560.52	212.3	104.75	49.91	173.9	35.38	196.46	11_Fabids
228	Ficus erecta	163.16	246.94	831.74	0	155.84	240.18	0	711.49	386.28	397.5	51.17	447.21	35.01	238.62	11_Fabids
229	Morus notabilis	0	408.08	513.58	249.12	194.49	223.88	583.42	630.21	363.13	177.91	55.05	206.4	39.71	215.5	11_Fabids
230	Ochetophila trinervis	0	815.77	885.23	171.61	0	0	232.01	474.02	522.07	184.51	49.63	917.67	38.75	299.83	11_Fabids
231	Ziziphus jujuba	0	701.58	957.59	238.25	456.55	181.52	245.62	490.41	405.69	773.82	50.85	352.09	38.29	353.78	11_Fabids
232	Prunus avium	222.58	384.6	451.56	182.37	111.66	0	265.6	454.15	265	229.62	50.09	0	41.84	241.68	11_Fabids
233	Prunus dulcis	0	424.28	834.39	0	105.88	0	0	781.71	438.14	301.07	48.89	300.54	37.44	286.81	11_Fabids
234	Prunus mume	0	424.26	508.57	0	102.87	532.99	441.53	529.35	286.29	294.51	49.26	337.39	66.23	227.67	11_Fabids
235	Prunus persica	0	536.86	812.18	0	96.44	152.53	0	462.01	477.8	732.02	49.14	440.21	38.43	235.81	11_Fabids
236	Prunus yedoensis	0	405.77	665.79	191.6	114.94	238.16	308.23	523.14	381.47	1404.65	50.25	646.45	39.88	269.4	11_Fabids
237	Malus baccata	155.08	684.63	673.12	0	128.73	0	0	287.73	223.4	234.34	50.98	245.23	41.29	286.32	11_Fabids
238	Malus domestica	0	712.24	640.97	0	137.41	141.25	639.05	245.62	234.23	113.7	52.15	354.04	39.83	269.95	11_Fabids
239	Pyrus betulifolia	0	364.43	869.3	239.14	138.73	0	0	288.16	237.21	289.71	49.61	0	38.31	226.81	11_Fabids
240	Pyrus x bretschneideri	364.77	362.29	861.33	0	140.69	0	0	287.93	237.61	691.51	50.64	177.09	42.32	255.64	11_Fabids
241	Pyrus ussuriensis x Pyrus communis	0	374.97	1041.11	0	152.86	0	0	336.33	275.59	169.65	50.13	568.84	37.89	251.2	11_Fabids
242	Dryas drummondii	0	401.84	638.9	0	119.83	971.5	192.35	637.34	336	350.19	50.23	452.07	39.67	259.11	11_Fabids
243	Purshia tridentata	0	644.16	638.05	0	105.94	127.65	213.03	438.88	293.64	604.59	49.15	327.74	38.76	247.4	11_Fabids
244	Geum urbanum	0	604.95	1033.28	447.91	131.95	0	0	782.07	547.05	661.9	50.05	316.46	41.61	449.64	11_Fabids
245	Fragaria nubicola	710.74	283.85	327.95	0	105	0	0	407.2	217.1	145.66	48.06	387.24	36.67	213.94	11_Fabids
246	Fragaria orientalis	544.71	241.72	279.54	46.12	102.06	0	264.45	353.51	194.39	123.3	48.49	339.37	36.98	200.31	11_Fabids
247	Fragaria vesca	192.03	337.11	748.69	213.37	116.45	594.84	0	724.23	352.77	358.04	48.83	546.48	39.67	248.77	11_Fabids
248	Fragaria x ananassa	809.62	270.2	394.6	0	124.44	213.94	0	373.41	246.97	187.68	47.98	230.42	38.49	205.58	11_Fabids
249	Rosa chinensis	751.29	512.27	1190.18	0	149.11	0	243.35	634.22	333.87	366.4	50.79	487.13	39.09	345.24	11_Fabids
250	Rosa lucieae	154	466.06	538.32	356.5	105.98	0	255.78	569.82	289.73	205.5	50.3	359.1	37.26	245.51	11_Fabids
251	Rosa x damascena	95.53	453.69	585.98	752.82	171.88	0	0	592.81	267.96	242.34	49.48	515.64	37.19	252.53	11_Fabids
252	Boehmeria nivea	0	420.33	772.91	0	82.65	0	0	570.36	316.49	368.61	48.12	255.59	146.56	276.18	11_Fabids
253	Begonia fuchsioides	0	1015.84	750.73	0	82.43	0	0	510.32	313.68	479.8	52.85	498.29	117.67	374.38	11_Fabids
254	Benincasa hispida	0	560.49	1164.77	0	253.32	0	325.09	0	440.22	344.19	52.14	299	40.5	339.47	11_Fabids
255	Citrullus lanatus	0	387.2	504.08	0	143.61	434.94	0	438.91	300	127.99	51.53	270.92	37.64	266.71	11_Fabids
256	Cucumis melo	387.1	434.7	757.14	0	133.31	0	148.08	402.45	467.79	263.87	50.49	433.83	42.47	250.98	11_Fabids
257	Cucumis sativus	0	519.96	645.04	1081.74	131.98	0	244.19	445.14	354.75	618.33	52.8	516.24	46.28	296.92	11_Fabids
258	Lagenaria siceraria	0	359.53	611.67	0	143.94	0	0	262.45	274.69	198.14	51.15	329.03	39.86	247.15	11_Fabids
259	Cucurbita argyrosperma	0	319.12	380.38	0	162.27	0	0	309.66	312.25	184.25	52.16	266.26	40.69	279.46	11_Fabids
260	Cucurbita moschata	0	357.06	500.28	0	261.8	0	400.02	428.01	253.54	180.94	50.87	1129.52	66.97	318.12	11_Fabids
261	Momordica charantia	293.21	405.56	917.6	0	123.99	0	0	1132.14	483.08	123.17	48.71	469.73	40.06	287.61	11_Fabids
262	Datisca glomerata	0	599.42	1022.92	0	164.88	352.74	340.15	435.72	426	225	144.85	1331.64	95.2	301.12	11_Fabids
263	Alnus glutinosa	139.8	466.22	468.88	0	108.41	0	169.24	579.65	294.31	149.27	48.98	305.78	35.45	268.29	11_Fabids
264	Betula nana	0	453.31	328.76	0	228.62	147.17	0	484.58	241.32	162.45	48.04	254.2	35.35	203.16	11_Fabids
265	Betula pendula	1079.28	579.24	549.01	183.48	162.52	0	286.32	525.87	334.03	311.03	48.07	409.67	36.88	252.56	11_Fabids
266	Casuarina equisetifolia	0	600.6	946.09	532.06	144.99	0	1169.34	686.46	366.87	370.68	45.74	335.06	38.45	312.98	11_Fabids
267	Casuarina glauca	217.63	418.35	653.86	0	185.57	0	934.5	499.52	692.63	243.61	45.78	0	38.01	329.55	11_Fabids
268	Castanea mollissima	0	557.03	841.36	0	140.47	0	343.49	437.99	298.16	323.69	48.87	263.04	37.41	279.96	11_Fabids
269	Fagus sylvatica	794.29	595.17	579.62	173.38	203.76	0	437.84	481.3	270.87	596.82	49.59	178.65	37.21	222.42	11_Fabids
270	Quercus lobata	403.2	593.21	996.71	0	123.15	1377.33	0	420.09	304.98	719.05	50.18	1766.69	38.66	286.14	11_Fabids
271	Quercus robur	201.83	626.08	998.27	199	128.4	870.22	339.01	473.12	269.38	169.72	49.88	465.06	37.04	274.77	11_Fabids
272	Quercus suber	580.16	650.18	1078.46	206.17	181.87	1346.19	0	555.68	284.37	355.18	51.05	132.41	36.29	267.63	11_Fabids
273	Juglans cathayensis	0	747.4	672.3	0	164.59	435.55	182.01	771.99	353.46	0	50.74	318.07	37.86	276.1	11_Fabids
274	Juglans hindsii	233.22	646.43	621.9	285.51	164.71	143.47	0	588.62	382.23	144.49	51.18	248.87	38.99	275.67	11_Fabids
275	Juglans mandshurica	0	629.83	725.79	0	169.33	0	559.53	626.4	410.61	0	53.97	688.51	39.01	284.71	11_Fabids
276	Juglans microcarpa	40.53	548.66	533.68	0	158.24	0	335.14	505.11	338.38	173.85	50.75	602.9	37.18	283.78	11_Fabids
277	Juglans microcarpa x Juglans regia	0	850.17	795.85	0	183.19	629.21	426.24	1088.97	576.98	0	49.99	1077.2	38.96	287.43	11_Fabids
278	Juglans nigra	298.74	671.44	527.7	203.45	173.29	0	300.64	366.49	421.18	182.39	51.69	234.02	38.1	261.91	11_Fabids
279	Juglans regia	0	688.58	570.42	41.99	161.85	0	346.58	589.38	406.3	159.52	51.17	701.14	39.88	257.34	11_Fabids
280	Juglans sigillata	0	638.53	512.68	0	155.22	0	147.68	527.1	366.88	0	51.04	142.85	38.73	243.49	11_Fabids
281	Pterocarya stenoptera	0	578.03	553.76	0	179.96	0	386.09	327.2	370.66	941.37	50.63	275.34	38	251.87	11_Fabids
282	Morella rubra	665.01	627.81	712.24	274.86	207.67	316.74	317.14	544.17	539.98	642.11	48.9	187.04	36.35	287.37	11_Fabids
283	Punica granatum	270.04	407.55	807.56	239.9	147.74	224.02	0	846.58	322.03	229.23	48.69	349.07	45.79	307.63	12_Malvids
284	Eucalyptus grandis	0	743	785.97	0	158.38	1132.74	0	646.16	305.11	120.02	49.17	399.99	40.04	336.38	12_Malvids
285	Eucalyptus melliodora	654.43	912.92	981	0	172.67	812.64	212.98	489.71	322.77	278.02	50	267	39.13	294.02	12_Malvids
286	Eucalyptus pauciflora	0	977.11	908.89	0	173.29	215.8	313.38	709.91	344.71	283.38	50.63	530.6	39.33	398.68	12_Malvids
287	Gossypium darwinii	0	741.21	1127.42	0	0	0	0	264.31	423.07	1338.14	54.49	375.68	47.45	386.14	12_Malvids
288	Gossypium mustelinum	0	737.01	1092.14	0	0	0	0	548.59	421.26	1563.79	54.98	0	47.96	401.61	12_Malvids
289	Gossypium tomentosum	0	587.68	1126.22	0	143.18	0	0	306.34	432.66	1255.7	56.07	0	47.72	348.11	12_Malvids
290	Gossypium turneri	0	693.39	1089.94	0	79.69	0	0	260.44	420.76	325.95	53.29	0	43.61	306.08	12_Malvids
291	Metrosideros polymorpha	474.21	505.01	473.6	0	177.24	0	303.37	500.58	296.51	226.16	47.65	357.76	42.16	265.59	12_Malvids
292	Rhodamnia argentea	161.82	328.98	872.35	0	176.97	0	301.02	415.84	297.21	268.58	47.71	717.31	38.59	278.72	12_Malvids
293	Psidium guajava	0	810.28	904.96	0	147.37	0	320.09	670.15	325.41	200	47.64	796.11	38.31	387.95	12_Malvids
294	Syzygium oleosum	576.32	570.54	861.26	487.89	153.83	0	0	669.12	328.66	366.68	49.47	246.81	39.38	330.13	12_Malvids
295	Azadirachta indica	0	388.98	533.06	747.2	379.59	0	0	524.6	383.04	272.16	49.56	479.07	39.87	311.61	12_Malvids
296	Atalantia buxifolia	0	418.17	701.49	295.57	183.44	250.93	265	696.66	314.29	281.78	47.68	566.12	38.7	267.07	12_Malvids
297	Citrus cavaleriei	0	684.93	752.24	0	152.81	0	325.91	600.83	333	501.64	48.15	593.83	40.7	280.35	12_Malvids
298	Citrus clementina	0	704.86	1063.79	159.63	229.05	483.86	303.88	579.44	381.91	607.46	46.96	772.65	130.04	300.26	12_Malvids
299	Citrus hindsii	0	764.02	1082.87	2106.36	204.73	208.72	378.66	633.01	363.65	285.91	47.68	773.65	39.54	327.54	12_Malvids
300	Citrus maxima	0	724.46	1190.11	283.86	977.58	792.12	371.68	929.81	447.74	4113.92	47.9	739.26	39.85	303.3	12_Malvids
301	Citrus medica	754.39	848.68	864.24	0	154.95	166.13	229.19	768.21	419.99	628.17	48.38	0	61.54	307.87	12_Malvids
302	Citrus reticulata	206.7	605.1	864.4	0	76.55	0	0	575.83	458.11	274.35	47.99	784.78	60.13	316.56	12_Malvids
303	Citrus sinensis	322.73	702.49	658.62	499.81	210.35	167.78	330.41	554.98	337.6	341.25	47.42	514.64	46.01	276.6	12_Malvids
304	Citrus unshiu	0	493.91	735.6	0	153.62	0	334.32	455.85	345.75	495.67	48.04	406.36	40.27	271.57	12_Malvids
305	Citrus x paradisi x Citrus trifoliata	246.43	531.4	379.44	522.17	161.69	0	323.08	456.13	236.72	229.89	46.23	180.59	37.35	199.07	12_Malvids
306	Acer yangbiense	284.27	738.03	1288.54	0	283.61	0	236.57	675.15	370.83	0	52.42	0	42.25	340.99	12_Malvids
307	Xanthoceras sorbifolium	0	858.26	1041.14	166.54	112.45	0	551.81	654.03	446.18	1446.99	53.86	309.76	42.33	350.25	12_Malvids
308	Herrania umbratica	0	632.89	698.5	133.37	0	0	0	1018.07	402.86	0	48.66	0	39.6	297.48	12_Malvids
309	Corchorus capsularis	0	741.9	956.8	0	470.73	459.88	0	711.66	334.28	494.94	48.71	980.85	39.4	337.95	12_Malvids
310	Corchorus olitorius	0	596.72	1013.39	0	517.86	0	584.92	408.84	343.93	561.38	48.29	545.31	51.9	294.18	12_Malvids
311	Durio zibethinus	0	772.49	1440.83	0	87.19	0	458.93	713.02	615.49	1360.85	52.42	617.23	42.27	397.84	12_Malvids
312	Gossypioides kirkii	824.48	720.41	1132.05	0	106.99	0	582.95	623.87	350.1	2840.14	53.16	739.7	44.45	244.82	12_Malvids
313	Gossypium arboreum	0	802.65	1171.8	0	137.69	0	0	0	360.06	389	55.06	0	48.29	352.74	12_Malvids
314	Gossypium barbadense	0	625.88	829.75	0	0	0	455.56	491.34	332.17	1109.36	54	0	61.78	276.81	12_Malvids
315	Gossypium hirsutum	0	610.82	1083.45	0	309.96	253.43	522.85	973.34	357.28	631.48	55.2	0	51.53	365.9	12_Malvids
316	Gossypium raimondii	37.6	730.18	952.04	0	223.03	237.03	289.25	566.66	430.57	880.06	54.04	1393.19	46.7	285.37	12_Malvids
317	Gossypium thurberi	0	569.1	584.95	0	239.71	0	0	585.39	254.58	295.68	52.4	0	49.51	225.2	12_Malvids
318	Hibiscus syriacus	444.67	695.65	917.29	0	164.72	381.46	298.84	325.23	413.95	0	54.03	272.22	47.25	293.96	12_Malvids
319	Kokia drynarioides	0	748.69	953.5	263.14	143.03	213.49	0	485.68	328.88	371.13	52.71	0	42.79	248.84	12_Malvids
320	Aquilaria agallochum	0	603.99	1046.58	0	149.66	0	922.4	921.78	435.91	632.86	51.64	378.92	40.72	421.64	12_Malvids
321	Aquilaria sinensis	260.76	550.96	1516.58	289.22	132.03	248.65	0	1038.87	420.85	1531.58	52.18	0	48.75	418.72	12_Malvids
322	Aethionema arabicum	0	1071.59	581.61	319.63	132.97	153.12	215.49	421.04	314.88	0	55.65	375.13	48.25	283.32	12_Malvids
323	Arabis alpina	0	726.2	1261.44	98.02	187.48	623.06	398.16	465.73	442.1	152.13	49.81	557.74	42.13	359.12	12_Malvids
324	Arabis nordmanniana	0	466.82	375.54	0	155.68	396.12	441.73	365.09	232.25	0	49.55	336.64	44.22	225.55	12_Malvids
325	Aurinia saxatilis	398.46	521.2	523.68	0	154.99	267.9	286.33	385.14	324.09	171.02	48.99	456.65	40.04	293.27	12_Malvids
326	Odontarrhena argentea	0	451.06	405.46	0	122.12	239.88	306.42	377.98	272.31	72.69	49.49	404.95	38.32	225.46	12_Malvids
327	Anastatica hierochuntica	0	879.54	874.06	237.04	207.6	367.83	0	392.81	395.01	297.85	54.73	921.11	43.77	359.71	12_Malvids
328	Biscutella auriculata	0	621.72	587.48	191.17	165.39	0	0	313.42	326.2	180.96	54.21	283.32	43.18	278.12	12_Malvids
329	Biscutella laevigata	0	645.5	499.41	0	167.68	0	0	376.96	283.01	0	53.22	251.22	42.13	234.54	12_Malvids
330	Boechera puberula	0	379.36	408	261.04	191.08	0	284.7	326.91	283.31	182	50.05	415.83	39.73	262.83	12_Malvids
331	Boechera stricta	0	579.15	632.23	0	216.23	177.78	307.27	509.5	367.58	404.76	49.31	43.52	40.8	279.21	12_Malvids
332	Schrenkiella parvula	0	650.35	586.4	0	230.03	544.95	764.07	449.95	375.57	93.24	49.71	0	42.33	313.29	12_Malvids
333	Brassica cretica	0	521.95	506.54	0	172.29	0	0	332.09	314.13	0	50.09	716.6	40.47	290.47	12_Malvids
334	Brassica juncea	554.29	704.26	743.24	618.4	177.82	535.51	462.14	354.17	361.95	823.68	53.03	477.97	45.13	310.47	12_Malvids
335	Brassica napus	0	683.58	901.67	366.57	223.79	0	327.2	493.65	427.51	1021.49	50.74	223.79	43.48	308.27	12_Malvids
336	Brassica nigra	0	706.53	800.52	0	172.78	0	660.38	418.85	381.74	133.95	51.24	51.33	43.61	295.75	12_Malvids
337	Brassica oleracea	0	581.5	588.55	0	173.56	0	358.43	345.05	330.47	343.88	51.4	691.02	77.33	284.88	12_Malvids
338	Brassica rapa	839.18	506.73	477.05	0	147.8	247.25	0	374.7	300.92	284.45	49.45	623.31	43.08	263.4	12_Malvids
339	Erucastrum elatum	0	539.57	526.72	83.14	219.77	0	0	417.99	326.83	353.61	50.31	597.55	40.94	303.15	12_Malvids
340	Raphanus raphanistrum	366.72	502.35	498.44	458.6	170.64	0	0	433.92	301.56	245.82	49.39	378.79	39.99	272.36	12_Malvids
341	Raphanus sativus	0	583.47	631.44	0	192.75	0	336.7	457.66	286.02	317.68	51	790.44	42.17	270.62	12_Malvids
342	Arabidopsis halleri	0	573.21	647.56	153.96	197.77	0	0	305.88	248.39	254.21	48.76	289.23	40.96	279.33	12_Malvids
343	Arabidopsis lyrata	0	666.23	1046.77	0	206.33	0	0	486.36	305.02	774.27	49.36	606.34	39.64	475.49	12_Malvids
344	Arabidopsis thaliana	0	505.61	904.34	167.45	165.02	0	0	444.57	358.46	339.76	48.61	1040.77	40.12	446.97	12_Malvids
345	Camelina sativa	722.25	611.07	806.38	0	214.33	0	552.09	359.88	318.64	0	48.91	772.94	38.96	290.59	12_Malvids
346	Capsella bursa-pastoris	416.47	425.35	612.48	0	154.98	107.18	221.24	367.22	319.41	0	48.4	1651.11	38.98	296.35	12_Malvids
347	Capsella rubella	380.67	531.14	666.42	0	154.07	0	0	432.36	317.73	220.21	48.93	1029.97	39.4	332.22	12_Malvids
348	Barbarea vulgaris	0	421.03	544.75	0	211.45	501.87	513.21	313.31	264.56	0	48.8	334.83	38.72	263.08	12_Malvids
349	Leavenworthia alabamica	722.68	468.18	633.72	0	246.95	0	687.2	464.68	348.78	631.83	50.21	627.82	49.95	329.95	12_Malvids
350	Nasturtium officinale	0	471.86	781.92	0	171.89	0	0	712.95	387.98	349.22	49.04	0	39.2	470.28	12_Malvids
351	Noccaea caerulescens	440.66	388.11	541.07	0	146.91	0	0	378.31	277.29	260.23	49.7	0	37.46	284.75	12_Malvids
352	Noccaea goesingensis	0	396.88	335.07	250.62	130.52	266.93	210.82	239.82	181.34	178.22	50.07	241.19	38.54	183.68	12_Malvids
353	Raparia bulbosa	0	490.47	632.63	0	167.79	0	0	353.52	305.04	217.14	49.94	560.51	36.1	352.4	12_Malvids
354	Conringia planisiliqua	0	727	996.29	0	256.31	549.34	288.53	477.87	491.58	914.41	49.47	214.66	46.78	454.71	12_Malvids
355	Cochlearia officinalis	0	419.25	407.86	189.12	140.28	0	171.9	257.19	230.48	322.27	52.41	292.83	40.71	216.28	12_Malvids
356	Crucihimalaya himalaica	0	754.52	1078.98	0	152.04	0	872.41	438.68	489.63	129.04	50.32	365.47	44.91	377.7	12_Malvids
357	Erysimum cheiri	0	421.44	399.57	0	157.22	0	145.54	297.62	229.14	229.02	50.43	284.61	38.47	234.72	12_Malvids
358	Erysimum pusillum	0	520.75	487	0	210.85	199.77	0	357.14	264.95	268.35	49.97	413.36	39.11	333.09	12_Malvids
359	Euclidium syriacum	0	586.27	1023.79	0	166.91	395.89	0	525.98	378.89	724.85	48.9	325.35	41.61	383.84	12_Malvids
360	Eutrema heterophyllum	235.48	486.6	752.64	0	133.08	0	0	340.75	392.04	313.82	51.92	293.8	40.13	265.95	12_Malvids
361	Eutrema salsugineum	0	830.04	1699.7	0	265.97	380.24	0	832.44	531.19	86.98	49.99	824.97	40.13	536.96	12_Malvids
362	Eutrema yunnanense	0	726.63	804.96	267.29	189.85	249.67	0	450.52	391.02	394.42	52.23	275.44	41.72	339.33	12_Malvids
363	Iberis amara	297.67	489.03	441.17	239.63	137.49	0	247.54	349.45	253.19	0	51.37	537.36	41.13	229.09	12_Malvids
364	Iberis pinnata	0	694.56	794.95	0	215.44	0	0	550.69	378.39	0	52.85	594.04	43.92	297.77	12_Malvids
365	Isatis lusitanica	0	708.46	539.79	0	232.62	454.32	0	461.85	324.89	0	50.64	0	40.19	294.72	12_Malvids
366	Isatis tinctoria	0	659.99	465.11	0	197.76	0	0	435.7	266.84	0	50.38	332.37	39.15	284.13	12_Malvids
367	Kernera saxatilis	0	552.82	579.03	0	176.47	649.97	0	484	305.47	292.77	50.14	326	40.06	302.97	12_Malvids
368	Lepidium africanum	0	801.56	949.21	0	159.35	0	0	467.58	379	0	54.42	0	44.18	267.16	12_Malvids
369	Lepidium aucheri	0	1052.3	951.45	0	150.82	0	0	581.77	422.15	0	72.56	867.25	48.05	322.44	12_Malvids
370	Sisymbrium altissimum	0	660.27	799.32	0	189.97	0	0	690.77	461.77	0	50.49	0	40.59	445.98	12_Malvids
371	Sisymbrium irio	0	647.43	511.13	0	213.31	0	0	618.85	329.11	0	50.02	349	41.27	288.62	12_Malvids
372	Macropodium nivale	0	487.68	463.46	0	165.92	0	0	422.35	274.51	340.09	51.83	439.48	43.31	253	12_Malvids
373	Pseudoturritis turrita	0	672.67	1154.51	0	202.33	500.88	0	594.57	547.72	631.48	51.15	0	41.95	432.57	12_Malvids
374	Turritis glabra	0	675.43	747.23	0	197.01	0	0	465.73	391.99	0	50.54	667.74	40.63	342.05	12_Malvids
375	Thlaspi arvense	148.12	804.7	1177.65	0	164.64	415.66	0	592.9	400.85	510.72	52.16	896.78	41.73	428.45	12_Malvids
376	Carica papaya	0	533.09	1044.91	456.91	127.95	0	195.09	108.24	248.1	338.22	52.81	1262.18	42.11	342.69	12_Malvids
377	Tarenaya hassleriana	0	331.19	782.64	0	135.16	0	0	558.41	282.58	481.13	50	749.14	42.17	351.61	12_Malvids
378	Santalum album	346.94	332.33	585.48	0	165.68	0	0	668.63	287.83	233.66	47.29	0	36.04	253.32	13_Super_asterids
379	Amaranthus hypochondriacus	0	237.06	259.19	128.45	130.52	276.27	0	265.03	149.45	0	49.88	179.25	41.78	129.11	13_Super_asterids
380	Carnegiea gigantea	0	781.33	1154.6	0	222.51	511.82	200.32	987.14	469.86	350.59	60.91	646.97	42.18	389.34	13_Super_asterids
381	Lophocereus schottii	444.35	695.62	830.28	0	155.93	0	0	636.98	414.43	0	60.17	628.99	43.99	369.72	13_Super_asterids
382	Pachycereus pringlei	0	533.2	782.7	0	223.06	0	226.4	762.73	388.23	193.55	51.86	493.35	41.18	345.11	13_Super_asterids
383	Stenocereus thurberi	499.81	581.53	960.11	0	216.71	0	370.06	590.16	411.82	823.01	61.31	976.37	44.34	393.07	13_Super_asterids
384	Pereskia humboldtii	250.43	486.22	554.69	0	124.57	0	0	342.68	386.32	0	47.32	175.96	39.83	252.9	13_Super_asterids
385	Dianthus caryophyllus	67.5	473.68	666.9	0	152.58	0	285.97	284.82	298.88	0	52.92	139.9	47.5	283.81	13_Super_asterids
386	Silene latifolia	0	621	461.21	0	143.15	148.6	275.9	301.53	228.91	0	51.32	546.17	46.94	229.93	13_Super_asterids
387	Beta vulgaris	210.13	507	760.43	324.42	182.32	382.2	575.22	376.38	285.27	261.71	54.93	142.25	69.2	278.19	13_Super_asterids
388	Beta patula	138.75	510.2	336.63	162.23	170.9	0	154.43	288.14	208.27	218.19	53.63	122.78	48.69	186.25	13_Super_asterids
389	Bassia scoparia	342.41	636.62	962.24	624.8	138.04	0	698.78	622.56	347.81	383.01	57.78	182.35	56.48	317.34	13_Super_asterids
390	Spinacia oleracea	0	696.06	1302.47	0	150.75	467.21	75.08	1062.38	564.12	464.56	53.12	243.86	55.25	338.27	13_Super_asterids
391	Chenopodium pallidicaule	0	466.22	1275.03	922.89	166.15	0	588.37	876.73	428.51	1079.98	50.95	142.64	44.86	304.88	13_Super_asterids
392	Chenopodium quinoa	0	541.38	1634.03	801.78	114.85	246.2	0	269.2	360.13	908.39	54.12	242.09	47.55	452.34	13_Super_asterids
393	Chenopodium suecicum	280.51	474.18	1065.56	494.79	74.86	535.1	156.06	631.78	469.41	308.81	53.52	186.19	48.21	299.99	13_Super_asterids
394	Drosera capensis	606.92	417.49	754.28	0	170.54	0	0	503.04	337.05	152.36	49.91	1604.02	40.28	252.27	13_Super_asterids
395	Fagopyrum esculentum	0	909.16	1299.74	190.13	415	667.71	0	813.16	384.07	374.79	50.19	1407.65	45.95	372.3	13_Super_asterids
396	Fagopyrum tataricum	0	738.29	1362.1	0	529.51	0	826.34	604.2	368.37	669.14	48.52	243.1	48.24	304.4	13_Super_asterids
397	Nyssa sinensis	0	692.6	990.5	0	121.09	84.24	622.32	148.28	481.05	1026.6	49.84	1150.18	38.38	377.85	13_Super_asterids
398	Actinidia chinensis	107.57	339.46	571.41	0	161.48	252.08	110.66	341.71	236.01	195.72	50.66	661.62	37.22	230.28	13_Super_asterids
399	Actinidia eriantha	250.33	310.08	719.84	0	135.77	0	376.14	477.21	279.27	237.52	52.01	0	39.32	243.64	13_Super_asterids
400	Monotropa hypopitys	0	453.28	594.33	0	135.79	0	0	400.38	390.7	0	54.81	250.55	45.23	335.96	13_Super_asterids
401	Vaccinium macrocarpon	0	380.28	402.32	287.14	150.69	432.87	0	279.57	221.95	0	46.61	232.96	34.51	184.87	13_Super_asterids
402	Embelia ribes	0	394.02	692.12	201.92	194.35	0	0	334.83	366.43	302.08	47.4	531.61	39.01	295.76	13_Super_asterids
403	Primula veris	0	380.6	530.89	192.28	159.49	196.33	0	383.29	244.73	189.09	49.32	478.41	40.29	219.64	13_Super_asterids
404	Argania spinosa	0	523.14	645.32	472.52	129.4	212.85	380.4	455.88	311.79	421.7	48.92	480.69	37.5	280.05	13_Super_asterids
405	Camellia sinensis	0	580.76	1265.43	0	102.24	153.51	275.34	448.55	328.88	827.5	52.72	1156.56	60.1	377.36	13_Super_asterids
406	Andrographis paniculata	0	921.1	934.2	0	123.64	0	325.35	985.99	372.32	712.92	51.14	279.48	41.31	265.14	14_Lamiids
407	Handroanthus impetiginosus	0	495.07	864.2	0	171.16	0	327.44	627.01	362.1	180.69	49.93	409.99	39.31	300.65	14_Lamiids
408	Dorcoceras hygrometricum	0	400.5	851.53	0	0	0	0	818.44	415.56	443.89	48.39	215.43	44.49	422.32	14_Lamiids
409	Pogostemon cablin	0	577.99	1113.9	993.03	79.63	229.57	596.29	269	284.18	862.72	50.47	0	48.92	257.85	14_Lamiids
410	Scutellaria baicalensis	0	830.96	1216.95	504.69	116.92	0	379.51	625.99	478.85	205.48	51.54	609.35	43.2	310.62	14_Lamiids
411	Perilla citriodora	0	539.97	1078.67	0	152.44	0	836.13	509.94	311.49	0	50.09	273.36	40.9	337.47	14_Lamiids
412	Salvia splendens	1018.86	1262.79	1464.84	370.18	135.72	97.37	0	292.64	468.27	628.64	49.94	259.21	59.41	298.57	14_Lamiids
413	Genlisea aurea	0	395.4	159.23	0	58.26	118.21	0	278.36	231.37	0	47.69	1553.5	35.56	232.95	14_Lamiids
414	Utricularia gibba	0	510.08	990.16	1647.28	0	730.79	0	517.01	535.71	9208.27	48.85	0	40.03	513.02	14_Lamiids
415	Lindernia brevidens	971.74	1534.11	1374.49	347.43	168.4	0	0	661.63	428.76	1402.66	45.99	234.9	38.98	367.88	14_Lamiids
416	Olea europaea	0	309.76	488.59	0	142.48	0	197.43	482.8	390.83	148.3	49.74	90.88	38.3	273.15	14_Lamiids
417	Striga asiatica	232.46	1019.91	1110.21	0	594.87	0	0	517.65	414.08	671.2	49.12	198.62	43.5	400.68	14_Lamiids
418	Sesamum indicum	224.84	684.17	787.02	246.84	157.67	0	0	578.74	361.56	374.82	49.83	0	41.84	265.65	14_Lamiids
419	Penstemon barbatus	0	1050.9	1485.93	462.27	139.56	0	195.3	624.63	323.71	591.83	47.91	842.76	42.45	345.23	14_Lamiids
420	Cuscuta australis	695.73	297.02	952.48	251.71	160.05	198.5	0	459.58	255.23	814.65	56.53	733.87	62.36	245.55	14_Lamiids
421	Cuscuta campestris	0	288.37	648.65	358.04	134.94	0	143.54	348.86	235.69	427.95	56.82	282.99	49.69	231.12	14_Lamiids
422	Ipomoea batatas	0	491.64	470.9	0	129.77	418.97	0	451.72	218.96	193.36	51.16	0	41.41	218.84	14_Lamiids
423	Ipomoea nil	299.08	772.99	1073.21	0	168.66	459.45	0	535.59	300.81	4283.82	52.41	333.15	52.89	273.29	14_Lamiids
424	Ipomoea trifida	198.77	623.96	569.79	0	151.38	0	171.49	408.11	254.46	392.68	50.28	292.99	45.56	259.33	14_Lamiids
425	Ipomoea triloba	154.56	581	763.99	257.17	148.54	262.61	214.09	438.48	244.13	511.57	51.97	1450.65	43.52	250.28	14_Lamiids
426	Nicotiana attenuata	0	564.09	1489.85	1320.9	146.09	0	0	271.27	269.99	789.75	49.91	1079.72	55.9	385.58	14_Lamiids
427	Nicotiana glauca	0	528.6	1030.94	0	140.32	0	0	398.91	328.35	0	51.23	1059.74	45.64	325.14	14_Lamiids
428	Nicotiana knightiana	0	654.71	1196.77	0	124.22	108.55	0	239.38	266.39	232.51	50.95	509.99	281.15	385.79	14_Lamiids
429	Nicotiana obtusifolia	0	636.15	1269.05	235.88	141.45	151.08	0	280.07	296.29	231.84	50.45	1560.55	43.18	352.11	14_Lamiids
430	Nicotiana paniculata	0	621.8	1240.3	0	138.05	0	0	253.46	264.51	165.05	50.37	3861.87	52.73	368.28	14_Lamiids
431	Nicotiana tabacum	0	461.69	1175.24	231.16	145.04	0	0	300.83	244.81	180.07	50.34	2616.74	48.65	301.59	14_Lamiids
432	Nicotiana undulata	246.61	531.93	1262.24	156.43	139.88	843.91	0	248.33	257.51	0	50.02	1077.54	49.71	468.93	14_Lamiids
433	Capsicum annuum	0	596.25	1472.79	0	136.87	455.94	0	377.21	435.36	699.54	56.1	774.67	48.46	453.08	14_Lamiids
434	Capsicum baccatum	0	620.34	1259.92	0	137.82	0	0	341.71	418.74	1362.34	55.22	697.21	52.05	380.81	14_Lamiids
435	Capsicum chinense	504.05	479.41	1106.3	0	129.96	0	1517.4	417.15	368.65	537.6	53.45	768.33	45.66	445.3	14_Lamiids
436	Jaltomata sinuosa	341.51	443.06	1532.08	0	138.72	0	0	317.58	295.86	188.01	53.14	242.51	46.34	543.23	14_Lamiids
437	Solanum arcanum	0	358.43	837.69	0	147.39	0	265.41	329.11	259.48	206.06	51.52	581.73	50.94	283.54	14_Lamiids
438	Solanum chilense	0	523.63	898.42	0	136.89	0	0	420.29	286.4	152.74	51.45	439.11	49.45	292.74	14_Lamiids
439	Solanum habrochaites	0	366.07	922.86	0	127.96	0	337.11	490.08	258.97	210.95	53.57	0	50.73	285.78	14_Lamiids
440	Solanum lycopersicum	0	383.96	1160.49	0	138.34	0	0	783.5	272.38	296.24	52.53	57.7	53.11	328.3	14_Lamiids
441	Solanum pennellii	0	460.22	1179.45	0	228.8	0	0	600.33	277.86	172.97	51.87	597.5	111.15	328.58	14_Lamiids
442	Solanum melongena	0	348.73	812	0	134.11	0	0	198.33	232.33	175.1	52.78	189.6	47.01	246.05	14_Lamiids
443	Asclepias syriaca	0	527.44	481.4	269.53	230.49	0	206.62	364.23	304.6	276.43	47.96	452.26	35.38	302.31	14_Lamiids
444	Calotropis procera	0	612.42	454.91	0	0	0	0	212.78	193.11	539.77	49.52	0	34.65	247.4	14_Lamiids
445	Rhazya stricta	0	467.63	726.48	1338.59	186.25	0	756.29	765.01	439.99	218.06	48.35	0	37.08	294.9	14_Lamiids
446	Catharanthus roseus	130.79	579.93	727.31	0	133.92	433.78	274.99	831.47	520.96	312.13	50.51	77.46	39.59	312.93	14_Lamiids
447	Coffea arabica	833.88	753.4	1306.43	0	183.71	238.27	799.07	750.35	349.41	0	49.22	2380.78	37.08	339.64	14_Lamiids
448	Coffea canephora	0	639.12	978.68	0	155.53	0	281.76	678.26	316.77	0	48.49	547.63	43.88	287.82	14_Lamiids
449	Coffea eugenioides	386.63	937.26	1338.55	169	149.04	0	0	579.65	357.7	319.87	48.84	8460.33	38.28	345.29	14_Lamiids
450	Echium plantagineum	0	741.95	541.32	0	118.49	423.79	219.53	846.69	237.54	1014.96	49.09	130.23	45.78	231.27	14_Lamiids
451	Mikania micrantha	501.65	299.72	1744.49	0	135.54	467.53	218.78	315.52	374.25	149.41	51.94	206.92	49.88	364.74	15_Campanulids
452	Artemisia annua	0	604.1	924.75	339.8	210.73	0	0	630.62	328.04	0	50.86	201.08	54.29	366.07	15_Campanulids
453	Erigeron canadensis	0	279.85	524.11	0	185.9	0	0	300.89	224.22	68.82	47.73	217.87	42.72	231.85	15_Campanulids
454	Helianthus annuus	788.03	607.66	1789.04	309.82	443.06	75.11	0	777.41	288.76	427.9	51.13	899.32	52.66	410.57	15_Campanulids
455	Cynara cardunculus var. scolymus	190.96	320.09	1171.52	270.36	137.82	235.38	1066.73	301.43	281.28	130.63	50.18	569.16	47.62	296.88	15_Campanulids
456	Lactuca sativa	0	933.32	1242.06	0	843.97	586.92	327.04	575.16	376.05	0	51.59	518.92	44.79	477.03	15_Campanulids
457	Codonopsis pilosula	280.92	593.83	1133.69	0	130.81	662.52	264.02	441.44	288.3	219.81	53.98	78.41	50.89	311.7	15_Campanulids
458	Platycodon grandiflorus	0	538.19	910.84	198.07	112.7	0	430.82	361.71	320.54	291.53	50.4	78.62	42.47	297.76	15_Campanulids
459	Daucus carota	0	630.68	976.83	431.71	115.27	0	186.7	1331.67	305.92	179.68	54.3	577.35	46.29	308.99	15_Campanulids
