# Supplementary material for: PlantRep: a database of plant repetitive elements
Source: Plant Cell Rep. 2022 Jan 3;41(4):1163–6. doi: 10.1007/s00299-021-02817-y (PMC9035001; doi:10.1007/s00299-021-02817-y)
Supplement: Supplementary file 6 — Supplementary file6 (XLS 43 kb) [file 299_2021_2817_MOESM6_ESM.xls]

## Sheet: 4a TIR
Supplementary Table 4a The distribution of divergence rate for the class of TIR in plant clade
Species_type	Alage	Bryophyte	Lycophytes	Fern	Gymnosperms	ANA	Magnoliids	Monocots	Base	Super	Fabids	Malvids	Lamiids	Campanulids
0-1	0.0278	0.0048	0.0307	0.014	0.0005	0.004	0.0015	0.0036	0.0066	0.0033	0.0046	0.0045	0.0041	0.0033
1-2	0.0129	0.0043	0.0493	0.01	0.0005	0.002	0.0018	0.004	0.0117	0.0031	0.0054	0.0047	0.005	0.0041
2-3	0.0157	0.0083	0.0263	0.02	0.0035	0.0055	0.006	0.0085	0.0164	0.0072	0.0104	0.0107	0.0101	0.0103
3-4	0.0169	0.0095	0.026	0.0213	0.007	0.0075	0.0073	0.0127	0.0203	0.01	0.0129	0.014	0.0137	0.0147
4-5	0.0161	0.0112	0.026	0.0283	0.0125	0.01	0.0095	0.0169	0.0246	0.0132	0.0176	0.0181	0.0184	0.0207
5-6	0.0232	0.0168	0.0257	0.0323	0.017	0.0125	0.0133	0.021	0.0283	0.0173	0.0212	0.022	0.0237	0.0263
6-7	0.0231	0.0195	0.0247	0.0363	0.0165	0.0165	0.0163	0.0237	0.0293	0.0201	0.0236	0.0249	0.0277	0.0284
7-8	0.0185	0.0243	0.0253	0.039	0.0165	0.0205	0.0193	0.0266	0.0311	0.0234	0.0262	0.0279	0.032	0.0324
8-9	0.0176	0.0287	0.0233	0.0377	0.018	0.026	0.0225	0.0299	0.0336	0.0273	0.0294	0.0306	0.0364	0.0369
9-10	0.0199	0.0345	0.0273	0.0377	0.0195	0.031	0.0267	0.0316	0.0364	0.0304	0.032	0.0326	0.0389	0.0383
10-11	0.0226	0.0385	0.0277	0.041	0.023	0.035	0.0288	0.0344	0.0387	0.0344	0.0349	0.0359	0.0422	0.0424
11-12	0.0217	0.0442	0.0273	0.04	0.027	0.0385	0.0298	0.0369	0.0403	0.0373	0.0376	0.0383	0.0443	0.0438
12-13	0.0231	0.047	0.0293	0.041	0.0305	0.0405	0.0325	0.0391	0.0424	0.041	0.0411	0.0414	0.0457	0.0461
13-14	0.0246	0.0485	0.0283	0.043	0.0345	0.0435	0.0355	0.0419	0.0433	0.0451	0.0443	0.0445	0.0482	0.0478
14-15	0.026	0.049	0.0307	0.044	0.04	0.0465	0.0395	0.044	0.0439	0.0481	0.0467	0.0474	0.0488	0.0492
15-16	0.03	0.0495	0.032	0.0423	0.0445	0.048	0.044	0.0469	0.0441	0.0513	0.0491	0.0498	0.0502	0.0502
16-17	0.0318	0.0493	0.033	0.0397	0.0495	0.0505	0.049	0.0492	0.0446	0.0533	0.0512	0.0518	0.0511	0.0506
17-18	0.0328	0.0503	0.0333	0.0387	0.054	0.054	0.0528	0.0513	0.046	0.055	0.0524	0.0532	0.0516	0.0508
18-19	0.0352	0.05	0.0347	0.0387	0.0545	0.055	0.0555	0.0525	0.0461	0.0553	0.0526	0.0535	0.0509	0.05
19-20	0.0387	0.0483	0.032	0.0393	0.056	0.055	0.056	0.0528	0.045	0.0538	0.0514	0.052	0.0482	0.048
20-21	0.0432	0.0488	0.0367	0.0413	0.057	0.056	0.0595	0.0542	0.0454	0.0544	0.0522	0.052	0.0485	0.0491
21-22	0.0449	0.0452	0.0343	0.0383	0.054	0.0535	0.059	0.0503	0.0429	0.0503	0.0481	0.048	0.0442	0.0456
22-23	0.0431	0.0425	0.0323	0.0367	0.0505	0.052	0.057	0.0473	0.0401	0.0463	0.0453	0.044	0.0403	0.0414
23-24	0.044	0.0382	0.0323	0.0343	0.047	0.048	0.054	0.0434	0.0377	0.0418	0.0404	0.0393	0.036	0.0373
24-25	0.0425	0.0335	0.0333	0.03	0.044	0.0415	0.047	0.0377	0.0331	0.0357	0.0347	0.0334	0.0301	0.0307
25-26	0.0426	0.0325	0.0337	0.0283	0.043	0.038	0.043	0.0341	0.0304	0.0324	0.0315	0.0298	0.0269	0.0263
26-27	0.0347	0.0265	0.032	0.0217	0.0375	0.0305	0.036	0.0277	0.0253	0.0264	0.0256	0.0237	0.0214	0.0202
27-28	0.0325	0.0238	0.0337	0.018	0.032	0.024	0.0285	0.0222	0.0207	0.0215	0.0208	0.0193	0.0172	0.016
28-29	0.025	0.0192	0.0357	0.015	0.0265	0.0185	0.022	0.0172	0.016	0.0174	0.0166	0.0153	0.0131	0.0119
29-30	0.0211	0.016	0.033	0.013	0.0225	0.0135	0.0168	0.0128	0.012	0.0136	0.0128	0.0118	0.0099	0.0091

## Sheet: 4b Circular dsDNA
Supplementary Table 4b The distribution of divergence rate for the class of Circular dsDNA in plant clade
Species_type	Alage	Bryophyte	Lycophytes	Fern	Gymnosperms	ANA	Magnoliids	Monocots	Base	Super	Fabids	Malvids	Lamiids	Campanulids
0-1	0.0064	0	0.0273	0.0007	0.0005	0.001	0.0013	0.0006	0.0006	0.0022	0.0035	0.0027	0.0022	0.0031
1-2	0.0038	0	0.0127	0	0.0005	0.001	0	0.0003	0.0009	0.0007	0.0031	0.0037	0.0063	0.0006
2-3	0.0049	0.0032	0.024	0.0007	0.002	0.0035	0.0057	0.0016	0.0057	0.0039	0.0041	0.004	0.0064	0.0046
3-4	0.0034	0.0065	0.019	0.0007	0.0035	0.0035	0.0047	0.0038	0.0111	0.0092	0.0058	0.0063	0.0072	0.0046
4-5	0.0069	0.0177	0.0167	0.001	0.006	0	0.0125	0.0047	0.0181	0.0107	0.0065	0.0074	0.0088	0.0143
5-6	0.004	0.0225	0.011	0.0057	0.008	0.0105	0.0095	0.005	0.0274	0.0079	0.0097	0.0073	0.0203	0.0131
6-7	0.005	0.0047	0.007	0.0067	0.006	0.015	0.013	0.0061	0.0434	0.0101	0.0109	0.0068	0.0115	0.011
7-8	0.0044	0.0065	0.005	0.0087	0.003	0.0165	0.0158	0.0053	0.047	0.0093	0.0137	0.0085	0.0222	0.0132
8-9	0.0043	0.0032	0.0077	0.0103	0.003	0.022	0.01	0.0061	0.0643	0.0108	0.0155	0.01	0.0115	0.0156
9-10	0.0067	0.0047	0.0053	0.015	0.005	0.014	0.0227	0.0066	0.0571	0.0124	0.0161	0.0102	0.0113	0.0182
10-11	0.0069	0.0015	0.0103	0.0213	0.0065	0.0045	0.0217	0.0083	0.0457	0.0134	0.014	0.0126	0.0134	0.0174
11-12	0.0093	0.0015	0.0127	0.027	0.006	0.0115	0.017	0.0084	0.0476	0.0152	0.0131	0.0139	0.0102	0.0191
12-13	0.0081	0.0097	0.0203	0.0277	0.0045	0.015	0.024	0.0088	0.0409	0.0161	0.0138	0.0161	0.0126	0.0201
13-14	0.0107	0.0015	0.027	0.029	0.0055	0.0185	0.02	0.0084	0.0351	0.0196	0.0141	0.0186	0.0121	0.0252
14-15	0.0117	0.0047	0.0143	0.03	0.006	0.0165	0.029	0.0098	0.0357	0.0197	0.0166	0.0168	0.0131	0.0326
15-16	0.0149	0.0015	0.024	0.0277	0.008	0.013	0.0227	0.0094	0.0371	0.0231	0.0152	0.0175	0.0156	0.0331
16-17	0.0146	0.013	0.026	0.0207	0.013	0.02	0.0232	0.01	0.0411	0.0218	0.0184	0.0177	0.0166	0.0368
17-18	0.0152	0.0097	0.0267	0.0187	0.024	0.02	0.0227	0.0094	0.0369	0.0227	0.0191	0.0206	0.0136	0.036
18-19	0.0113	0.013	0.0257	0.0187	0.0345	0.022	0.0227	0.0085	0.0437	0.0226	0.0181	0.0197	0.0122	0.0373
19-20	0.014	0.0097	0.0233	0.0143	0.048	0.0235	0.0225	0.008	0.0507	0.0231	0.0193	0.019	0.0145	0.0288
20-21	0.0199	0.0177	0.0443	0.011	0.051	0.033	0.0245	0.0086	0.0544	0.022	0.0189	0.0228	0.014	0.0291
21-22	0.0215	0.0192	0.046	0.0123	0.044	0.034	0.0238	0.0073	0.0524	0.0213	0.0167	0.0191	0.0132	0.0249
22-23	0.0209	0.0145	0.0183	0.0077	0.0395	0.0315	0.0225	0.0109	0.0381	0.0197	0.0144	0.0167	0.012	0.021
23-24	0.0175	0.008	0.05	0.0077	0.0395	0.034	0.0208	0.0075	0.037	0.0176	0.0143	0.0195	0.0113	0.0207
24-25	0.0179	0.0163	0.0217	0.0033	0.0335	0.0455	0.0205	0.0071	0.0276	0.0183	0.0127	0.0164	0.0099	0.0163
25-26	0.0131	0.0065	0.01	0.003	0.026	0.021	0.0135	0.006	0.0294	0.0126	0.0107	0.0148	0.0078	0.0166
26-27	0.0107	0.013	0.024	0.0017	0.02	0.0165	0.015	0.0064	0.0147	0.0096	0.0087	0.0117	0.0067	0.0122
27-28	0.0093	0.0032	0.0053	0.002	0.0135	0.0175	0.0112	0.0046	0.0193	0.0071	0.0084	0.0109	0.0035	0.0097
28-29	0.0076	0.008	0.028	0.0003	0.008	0.008	0.0065	0.0042	0.0106	0.0049	0.0061	0.0085	0.0032	0.007
29-30	0.0041	0.0047	0.0187	0.0003	0.005	0.006	0.006	0.0038	0.0051	0.0028	0.0052	0.0062	0.0029	0.0049

## Sheet: 4c DNA_Polymerase
Supplementary Table 4c The distribution of divergence rate for the class of DNA Polymerase in plant clade
Species_type	Alage	Bryophyte	Lycophytes	Fern	Gymnosperms	ANA	Magnoliids	Monocots	Base	Super	Fabids	Malvids	Lamiids	Campanulids
0-1	0.0089	0.0013	0.0213	0.1207	0	0	0.012	0.0005	0.0001	0.0011	0.0151	0.0026	0.0179	0.0103
1-2	0.009	0.0018	0.0167	0.0217	0.0005	0.0045	0.008	0.0024	0.0006	0.0005	0.0066	0.0032	0.0077	0.0038
2-3	0.0081	0.0055	0.0227	0.0287	0.001	0.0085	0.0123	0.0166	0.0003	0.0022	0.0078	0.0089	0.0032	0.0063
3-4	0.0066	0.0065	0.0613	0.0363	0.0015	0.0345	0.0103	0.014	0.0021	0.0039	0.0096	0.0079	0.0036	0.0078
4-5	0.007	0.0023	0.063	0.0263	0.0065	0.0475	0.0165	0.0124	0.0041	0.0058	0.0134	0.0088	0.0064	0.0098
5-6	0.0028	0.006	0.0703	0.0363	0.015	0.0345	0.0152	0.0088	0.0106	0.0073	0.0159	0.0123	0.009	0.0109
6-7	0.0085	0.017	0.107	0.0267	0.0185	0.0085	0.0118	0.0057	0.006	0.0082	0.0163	0.0127	0.016	0.0149
7-8	0.0114	0.0195	0.0773	0.0317	0.0165	0.0085	0.025	0.0066	0.0254	0.0094	0.0179	0.0176	0.0192	0.0176
8-9	0.0072	0.0297	0.0447	0.036	0.014	0.001	0.0232	0.0063	0.018	0.0156	0.0184	0.0166	0.0237	0.0224
9-10	0.0099	0.0305	0.0507	0.044	0.015	0.0055	0.0147	0.0082	0.0196	0.0187	0.019	0.0167	0.0269	0.0252
10-11	0.0142	0.0413	0.0497	0.0583	0.017	0.015	0.0203	0.0096	0.0196	0.0207	0.0223	0.0167	0.028	0.0314
11-12	0.0133	0.0485	0.0323	0.0527	0.0135	0.002	0.0273	0.0095	0.025	0.0231	0.0211	0.0167	0.0224	0.0319
12-13	0.0128	0.0417	0.0363	0.0327	0.018	0.009	0.0412	0.0106	0.0339	0.0275	0.0219	0.0174	0.0186	0.0396
13-14	0.0098	0.0425	0.0347	0.0473	0.022	0.006	0.0425	0.0116	0.0297	0.0338	0.0215	0.0189	0.0196	0.0373
14-15	0.0084	0.0273	0.023	0.0497	0.03	0.0145	0.0548	0.0118	0.0484	0.0346	0.0239	0.0208	0.0201	0.0364
15-16	0.0141	0.0323	0.0293	0.0503	0.0355	0.0135	0.0377	0.0122	0.0497	0.0296	0.0231	0.0219	0.0231	0.0392
16-17	0.0102	0.0232	0.026	0.0503	0.044	0.0335	0.044	0.0131	0.0627	0.0328	0.0247	0.0236	0.0167	0.042
17-18	0.0077	0.0213	0.0403	0.0407	0.06	0.058	0.0432	0.0126	0.0441	0.0342	0.0272	0.0233	0.0158	0.0407
18-19	0.0112	0.017	0.0347	0.0403	0.0655	0.066	0.0452	0.0122	0.0534	0.0345	0.0257	0.0218	0.0129	0.0273
19-20	0.009	0.0132	0.0237	0.0427	0.068	0.074	0.0407	0.0126	0.0547	0.0309	0.0256	0.0204	0.0119	0.0291
20-21	0.0111	0.0105	0.0217	0.0347	0.081	0.0345	0.0505	0.0096	0.0514	0.0299	0.0267	0.0228	0.0142	0.022
21-22	0.008	0.0118	0.0157	0.0293	0.075	0.07	0.0573	0.0106	0.0411	0.0244	0.0216	0.0198	0.0171	0.0228
22-23	0.0069	0.0105	0.015	0.0153	0.073	0.0555	0.0502	0.009	0.0417	0.0224	0.0201	0.0238	0.0141	0.0169
23-24	0.0084	0.005	0.018	0.0113	0.0695	0.047	0.0498	0.0086	0.0437	0.0194	0.0178	0.0219	0.0115	0.0178
24-25	0.0069	0.0065	0.0123	0.0103	0.062	0.0465	0.04	0.0063	0.0336	0.0151	0.0162	0.018	0.0094	0.0249
25-26	0.0068	0.005	0.012	0.0133	0.0515	0.0595	0.0457	0.0068	0.0439	0.0122	0.0144	0.0186	0.0088	0.0237
26-27	0.0055	0.0075	0.01	0.004	0.035	0.0345	0.0342	0.0065	0.0399	0.0107	0.0109	0.018	0.0077	0.014
27-28	0.0033	0.0067	0.008	0.003	0.0245	0.0325	0.035	0.0042	0.0329	0.0065	0.009	0.0134	0.0054	0.0148
28-29	0.004	0.0023	0.0043	0.0017	0.0155	0.052	0.0272	0.0032	0.0101	0.0045	0.0063	0.0115	0.0045	0.0074
29-30	0.0029	0.0018	0.0047	0.0023	0.008	0.0445	0.0253	0.0025	0.0046	0.0024	0.0046	0.009	0.0024	0.0076

## Sheet: 4d DIRS
Supplementary Table 4d The distribution of divergence rate for the class of DIRS in plant clade
Species_type	Alage	Bryophyte	Lycophytes	Fern	Gymnosperms	ANA	Magnoliids	Monocots	Base	Super	Fabids	Malvids	Lamiids	Campanulids
0-1	0.0219	0.0045	0.0113	0	0	0.0005	0.0015	0.017	0.005	0.0013	0.0164	0.0078	0.0069	0.001
1-2	0.0173	0.01	0.0047	0	0	0.002	0	0.0008	0.0394	0.0038	0.0029	0.0026	0.0109	0.0007
2-3	0.0167	0.0065	0.0123	0	0	0.0105	0.0125	0.0043	0.0544	0.0118	0.0056	0.0062	0.0064	0.017
3-4	0.0199	0.0163	0.038	0	0	0.0405	0.0298	0.0012	0.032	0.0103	0.0023	0.0039	0.0042	0.011
4-5	0.0176	0.0235	0.029	0	0	0.027	0.0155	0.003	0.009	0.0121	0.005	0.0059	0.0067	0.0064
5-6	0.0162	0.0323	0.003	0	0	0.0195	0.019	0.0055	0.003	0.0127	0.0056	0.0055	0.0128	0.0074
6-7	0.0176	0.0355	0.0307	0	0	0.0135	0.0203	0.0063	0.003	0.0154	0.0062	0.0045	0.0108	0.0116
7-8	0.0146	0.048	0.0177	0	0	0.0215	0.011	0.0086	0.0009	0.017	0.0087	0.006	0.0079	0.0146
8-9	0.012	0.02	0.027	0	0	0.0195	0.022	0.0079	0.0011	0.014	0.0093	0.0064	0.0083	0.0181
9-10	0.0148	0.012	0.0317	0	0	0.011	0.0763	0.0092	0.0024	0.0181	0.0123	0.0082	0.009	0.0163
10-11	0.0118	0.0125	0.0243	0	0	0.0195	0.0602	0.0107	0.0031	0.0194	0.0137	0.0057	0.0097	0.0197
11-12	0.0174	0.0178	0.0363	0	0	0.0215	0.0437	0.0118	0.0039	0.0225	0.0149	0.0087	0.0089	0.0166
12-13	0.0146	0.0135	0.0143	0	0	0.0215	0.0475	0.013	0.0051	0.0228	0.0175	0.0104	0.0112	0.0181
13-14	0.015	0.0205	0.044	0	0	0.022	0.0442	0.0112	0.0079	0.0221	0.0169	0.0093	0.0096	0.0316
14-15	0.018	0.0227	0.0187	0	0	0.0245	0.0537	0.0111	0.0131	0.0168	0.0175	0.0102	0.013	0.0362
15-16	0.0148	0.018	0.0133	0	0	0.032	0.0315	0.0125	0.0139	0.0204	0.02	0.0114	0.0119	0.0238
16-17	0.0136	0.0142	0.0327	0	0	0.0235	0.062	0.0098	0.0163	0.0204	0.0186	0.0142	0.0162	0.0209
17-18	0.0166	0.0245	0.019	0	0	0.024	0.0217	0.0117	0.0147	0.0207	0.02	0.0125	0.0174	0.0223
18-19	0.0205	0.0168	0.0337	0	0	0.025	0.024	0.0111	0.014	0.0189	0.0189	0.0123	0.0164	0.0243
19-20	0.0177	0.0198	0.0403	0	0	0.0175	0.024	0.0131	0.0131	0.0164	0.0211	0.0127	0.0132	0.0196
20-21	0.0198	0.0217	0.0373	0	0	0.015	0.0287	0.0123	0.008	0.0182	0.0208	0.0139	0.0153	0.015
21-22	0.0149	0.017	0.0177	0	0	0.0175	0.025	0.0121	0.007	0.0194	0.0172	0.0148	0.0125	0.0179
22-23	0.0147	0.0185	0.0227	0	0	0.014	0.0535	0.0108	0.0063	0.0209	0.0173	0.0114	0.0144	0.0134
23-24	0.0143	0.013	0.0093	0	0	0.0155	0.0478	0.0121	0.004	0.0133	0.0149	0.0114	0.0113	0.0132
24-25	0.0132	0.0087	0.002	0	0	0.013	0.0168	0.0091	0.0021	0.0109	0.0115	0.0088	0.0106	0.013
25-26	0.0133	0.01	0.0167	0	0	0.011	0.037	0.0086	0.0013	0.0115	0.0099	0.0098	0.0104	0.0108
26-27	0.0091	0.0083	0.012	0	0	0.0085	0.0182	0.008	0.001	0.0085	0.0071	0.0097	0.0076	0.0094
27-28	0.0099	0.006	0.011	0	0	0.0065	0.0215	0.0061	0.0007	0.0058	0.0068	0.007	0.0055	0.0064
28-29	0.0076	0.0025	0.0203	0	0	0.0005	0.0192	0.0055	0.0001	0.0053	0.0045	0.0061	0.0037	0.0034
29-30	0.0061	0.0015	0.0137	0	0	0.0015	0.0208	0.005	0.0001	0.004	0.0029	0.006	0.0032	0.0019

## Sheet: 4e Rolling_Circle
Supplementary Table 4e The distribution of divergence rate for the class of Rolling Circle in plant clade
Species_type	Alage	Bryophyte	Lycophytes	Fern	Gymnosperms	ANA	Magnoliids	Monocots	Base	Super	Fabids	Malvids	Lamiids	Campanulids
0-1	0.0217	0.002	0.0177	0.0093	0	0.0105	0.0015	0.0065	0.0066	0.0058	0.0069	0.0066	0.0069	0.0017
1-2	0.014	0.0008	0.0247	0.0043	0	0.0025	0.0045	0.0036	0.0079	0.0048	0.006	0.0062	0.0056	0.0014
2-3	0.0196	0.0025	0.028	0.011	0	0.009	0.009	0.0082	0.0146	0.0067	0.0096	0.0117	0.0091	0.0039
3-4	0.0228	0.0075	0.0313	0.021	0.0015	0.01	0.0155	0.0135	0.0159	0.0084	0.0122	0.0162	0.0094	0.0071
4-5	0.0162	0.0073	0.0413	0.019	0.004	0.01	0.0165	0.019	0.018	0.0102	0.0146	0.0211	0.0132	0.0142
5-6	0.0143	0.0118	0.0387	0.0273	0.011	0.0195	0.0155	0.0236	0.0211	0.0146	0.0201	0.0242	0.0178	0.017
6-7	0.0173	0.0165	0.049	0.032	0.0225	0.023	0.0145	0.025	0.0251	0.0202	0.0239	0.0276	0.0233	0.0202
7-8	0.0142	0.0212	0.0503	0.038	0.0295	0.0325	0.0195	0.0262	0.0246	0.0258	0.0263	0.03	0.0265	0.0261
8-9	0.0153	0.0302	0.0507	0.0413	0.033	0.0445	0.0248	0.0311	0.0264	0.033	0.0267	0.0321	0.0293	0.0301
9-10	0.0143	0.0323	0.048	0.0423	0.0305	0.041	0.029	0.0347	0.0319	0.034	0.0287	0.0334	0.0327	0.0327
10-11	0.0085	0.0338	0.042	0.049	0.024	0.0405	0.0318	0.0392	0.0356	0.0354	0.0295	0.0357	0.0347	0.0329
11-12	0.0131	0.0375	0.0513	0.0417	0.0235	0.047	0.027	0.0427	0.0361	0.0367	0.0327	0.0378	0.0371	0.0366
12-13	0.0117	0.0455	0.0427	0.0483	0.023	0.0525	0.03	0.0458	0.0373	0.0338	0.0346	0.0391	0.0386	0.0377
13-14	0.0153	0.0513	0.0407	0.0437	0.0215	0.058	0.0313	0.0494	0.0406	0.0365	0.0359	0.0418	0.0425	0.0412
14-15	0.0189	0.0515	0.0437	0.043	0.02	0.0485	0.0425	0.0507	0.042	0.0414	0.0372	0.0425	0.0443	0.0428
15-16	0.0129	0.0497	0.0367	0.0433	0.0185	0.0615	0.047	0.0518	0.0424	0.0411	0.0394	0.0431	0.0442	0.0476
16-17	0.0154	0.0533	0.036	0.0427	0.019	0.052	0.051	0.0507	0.0423	0.0441	0.0396	0.0422	0.0453	0.0472
17-18	0.0166	0.0643	0.0367	0.0357	0.0245	0.0495	0.055	0.0512	0.0414	0.0476	0.041	0.0418	0.0475	0.0499
18-19	0.0192	0.0617	0.0357	0.0377	0.0325	0.048	0.0563	0.05	0.0453	0.0472	0.0409	0.0414	0.047	0.0503
19-20	0.0198	0.0587	0.0347	0.033	0.0315	0.047	0.0455	0.0465	0.0443	0.0458	0.0407	0.0406	0.0474	0.0474
20-21	0.0156	0.0577	0.029	0.0353	0.032	0.0445	0.0467	0.0489	0.0449	0.0474	0.0425	0.04	0.0494	0.0479
21-22	0.0175	0.053	0.0307	0.0283	0.038	0.0405	0.044	0.0427	0.0446	0.0459	0.0425	0.0374	0.0456	0.0456
22-23	0.015	0.0478	0.028	0.0437	0.0415	0.0325	0.042	0.039	0.0404	0.0413	0.0397	0.0351	0.0426	0.0434
23-24	0.0101	0.0413	0.0233	0.0313	0.0435	0.0305	0.04	0.0348	0.0387	0.0424	0.0385	0.0332	0.0402	0.04
24-25	0.0132	0.0365	0.0157	0.0207	0.0475	0.0265	0.0377	0.0287	0.0343	0.0404	0.0367	0.0302	0.0343	0.0363
25-26	0.0137	0.0292	0.0167	0.0263	0.0455	0.0215	0.0395	0.0267	0.0314	0.0376	0.0368	0.0301	0.033	0.034
26-27	0.0113	0.0265	0.019	0.021	0.0455	0.0175	0.0328	0.0214	0.0271	0.0324	0.0336	0.027	0.0284	0.0296
27-28	0.0098	0.0208	0.0123	0.0223	0.047	0.0165	0.0328	0.0185	0.0271	0.0291	0.0316	0.0253	0.0258	0.0266
28-29	0.0065	0.015	0.009	0.0233	0.0495	0.0115	0.0257	0.0159	0.0233	0.0258	0.0296	0.0243	0.0216	0.0251
29-30	0.006	0.0115	0.0067	0.0237	0.0485	0.011	0.0222	0.0143	0.0186	0.0221	0.027	0.0222	0.0198	0.0236

## Sheet: 4f LTR
Supplementary Table 4f The distribution of divergence rate for the class of LTR in plant clade
Species_type	Alage	Bryophyte	Lycophytes	Fern	Gymnosperms	ANA	Magnoliids	Monocots	Base	Super	Fabids	Malvids	Lamiids	Campanulids
0-1	0.0393	0.0037	0.0117	0.0097	0.0005	0.004	0.0015	0.005	0.0059	0.0035	0.0056	0.0049	0.0045	0.0038
1-2	0.0327	0.007	0.0163	0.0097	0.001	0.0035	0.0035	0.0067	0.0123	0.0048	0.0069	0.0052	0.0058	0.0063
2-3	0.0277	0.011	0.0277	0.0193	0.0025	0.007	0.0085	0.0123	0.0186	0.009	0.0129	0.0115	0.01	0.0114
3-4	0.0236	0.0143	0.037	0.027	0.004	0.008	0.0125	0.0181	0.0246	0.0124	0.0173	0.0165	0.0155	0.0154
4-5	0.0205	0.0158	0.04	0.0373	0.0055	0.009	0.0152	0.024	0.0309	0.0154	0.0225	0.022	0.0191	0.0204
5-6	0.023	0.0207	0.0413	0.0443	0.008	0.011	0.0193	0.0305	0.0371	0.0206	0.0276	0.0263	0.0239	0.0261
6-7	0.0205	0.0222	0.0403	0.0463	0.01	0.0125	0.0218	0.035	0.0407	0.0249	0.0309	0.03	0.0279	0.0311
7-8	0.0222	0.0245	0.04	0.0453	0.012	0.0165	0.024	0.0386	0.0441	0.0288	0.0339	0.0329	0.0315	0.0361
8-9	0.0227	0.0292	0.042	0.045	0.016	0.021	0.0265	0.0421	0.0443	0.0331	0.0378	0.0362	0.0356	0.0393
9-10	0.0205	0.03	0.0413	0.0443	0.0205	0.0255	0.028	0.0435	0.0439	0.0353	0.0381	0.0375	0.0383	0.0407
10-11	0.0255	0.0307	0.041	0.0453	0.0245	0.0285	0.03	0.045	0.043	0.0382	0.0396	0.0394	0.0409	0.0437
11-12	0.0223	0.0327	0.0387	0.0437	0.0265	0.0345	0.031	0.0455	0.0431	0.0398	0.0406	0.0401	0.0428	0.0444
12-13	0.0255	0.036	0.0373	0.041	0.0295	0.0365	0.0315	0.0451	0.042	0.0417	0.0413	0.0403	0.0444	0.0456
13-14	0.0275	0.04	0.0357	0.04	0.0345	0.041	0.0335	0.0444	0.0404	0.0435	0.042	0.0414	0.0455	0.0454
14-15	0.0279	0.043	0.0347	0.037	0.039	0.044	0.036	0.0435	0.0401	0.0442	0.042	0.042	0.0461	0.0451
15-16	0.0265	0.0447	0.033	0.0347	0.043	0.048	0.0387	0.0428	0.04	0.0451	0.0423	0.0426	0.0468	0.0448
16-17	0.0274	0.0495	0.0327	0.0337	0.047	0.05	0.0412	0.0421	0.0394	0.0456	0.0422	0.043	0.0465	0.0443
17-18	0.031	0.0493	0.0327	0.0327	0.05	0.0505	0.0447	0.0411	0.0394	0.046	0.0424	0.0439	0.0469	0.0452
18-19	0.0325	0.0507	0.0317	0.0317	0.0525	0.0485	0.0467	0.0401	0.0384	0.046	0.0421	0.0441	0.0465	0.0448
19-20	0.0304	0.0483	0.0313	0.0323	0.0535	0.0485	0.0478	0.0389	0.0374	0.0452	0.0414	0.0435	0.0447	0.0432
20-21	0.0375	0.0465	0.0313	0.032	0.054	0.0485	0.0515	0.0389	0.037	0.0456	0.0419	0.0439	0.0442	0.0424
21-22	0.0373	0.043	0.0297	0.0323	0.053	0.0465	0.0515	0.0368	0.0349	0.0437	0.0402	0.042	0.0419	0.0401
22-23	0.0406	0.0405	0.0297	0.032	0.0515	0.045	0.0505	0.0353	0.0323	0.0418	0.0386	0.0399	0.0391	0.0373
23-24	0.0349	0.039	0.0273	0.0297	0.0495	0.042	0.0485	0.0332	0.03	0.0396	0.0364	0.0371	0.0362	0.0344
24-25	0.0338	0.036	0.027	0.028	0.047	0.039	0.045	0.0302	0.0274	0.0362	0.0336	0.0337	0.0326	0.0311
25-26	0.0306	0.0348	0.026	0.0257	0.0445	0.0385	0.0425	0.0279	0.0253	0.0342	0.0317	0.0311	0.0299	0.0283
26-27	0.0307	0.0307	0.024	0.0227	0.04	0.035	0.0378	0.0243	0.0227	0.0299	0.028	0.0274	0.027	0.0241
27-28	0.0245	0.027	0.0233	0.0197	0.036	0.0315	0.0328	0.021	0.0201	0.0258	0.0243	0.024	0.0234	0.0209
28-29	0.0179	0.023	0.0207	0.0177	0.0325	0.0295	0.027	0.0177	0.017	0.0219	0.0204	0.0203	0.0172	0.0176
29-30	0.0176	0.02	0.0193	0.0163	0.029	0.0265	0.0217	0.0144	0.014	0.0178	0.0166	0.0168	0.0136	0.0143

## Sheet: 4g LINE
Supplementary Table 4g The distribution of divergence rate for the class of LINE in plant clade
Species_type	Alage	Bryophyte	Lycophytes	Fern	Gymnosperms	ANA	Magnoliids	Monocots	Base	Super	Fabids	Malvids	Lamiids	Campanulids
0-1	0.0324	0.0053	0.0237	0.0067	0.0005	0.0015	0.0015	0.0043	0.0031	0.0022	0.0074	0.0019	0.0038	0.0038
1-2	0.0388	0.0033	0.027	0.0057	0	0.003	0.0005	0.0051	0.0077	0.0014	0.006	0.0024	0.005	0.0029
2-3	0.0393	0.0088	0.0253	0.0187	0.001	0.01	0.0028	0.0088	0.0113	0.0043	0.0076	0.0049	0.0089	0.0066
3-4	0.0384	0.013	0.0253	0.021	0.0015	0.0125	0.0035	0.009	0.0139	0.005	0.0079	0.0059	0.0103	0.0081
4-5	0.0344	0.0208	0.0253	0.0263	0.0025	0.017	0.0055	0.01	0.0141	0.007	0.0092	0.0074	0.0115	0.0126
5-6	0.0335	0.0305	0.0297	0.0303	0.0045	0.0135	0.008	0.0126	0.0147	0.0092	0.0109	0.0088	0.0134	0.019
6-7	0.0274	0.036	0.0303	0.032	0.006	0.014	0.009	0.014	0.0146	0.011	0.0124	0.0101	0.0146	0.0234
7-8	0.0245	0.032	0.0297	0.0337	0.0085	0.0165	0.0123	0.0172	0.0147	0.013	0.0143	0.0126	0.0171	0.0248
8-9	0.0235	0.0328	0.0283	0.0367	0.0125	0.0225	0.0152	0.0186	0.0151	0.0153	0.0162	0.015	0.0195	0.0281
9-10	0.0222	0.0368	0.029	0.035	0.0155	0.025	0.0183	0.0199	0.0159	0.017	0.0177	0.0173	0.0222	0.0281
10-11	0.0218	0.039	0.0293	0.0377	0.021	0.0305	0.024	0.0235	0.0179	0.0203	0.02	0.0202	0.0244	0.0313
11-12	0.0224	0.0425	0.028	0.0377	0.0255	0.035	0.027	0.0259	0.019	0.0228	0.022	0.0223	0.0264	0.0331
12-13	0.0208	0.0387	0.0303	0.038	0.032	0.035	0.0307	0.0281	0.0209	0.0251	0.0248	0.0246	0.0281	0.0352
13-14	0.0212	0.042	0.0333	0.0363	0.037	0.039	0.0345	0.031	0.0243	0.0287	0.0278	0.027	0.0309	0.0383
14-15	0.0235	0.037	0.031	0.037	0.0435	0.041	0.0365	0.0332	0.0271	0.0314	0.0308	0.0294	0.0342	0.0398
15-16	0.0243	0.0378	0.0307	0.0377	0.0495	0.047	0.0395	0.0348	0.0299	0.0343	0.0337	0.0317	0.0374	0.0427
16-17	0.0298	0.037	0.0347	0.0377	0.0525	0.0495	0.0418	0.0365	0.0319	0.0372	0.0372	0.0341	0.0406	0.0443
17-18	0.0285	0.0343	0.035	0.0387	0.051	0.0485	0.043	0.0389	0.0347	0.0396	0.0404	0.0373	0.0439	0.0457
18-19	0.0296	0.033	0.0357	0.037	0.0485	0.0485	0.0448	0.0402	0.0366	0.0429	0.0433	0.0393	0.045	0.0462
19-20	0.0338	0.0318	0.032	0.0373	0.0445	0.0475	0.044	0.0408	0.0389	0.0444	0.0455	0.0416	0.0454	0.0456
20-21	0.0358	0.0333	0.0363	0.0393	0.0435	0.0485	0.048	0.0455	0.0456	0.0491	0.0502	0.0462	0.0474	0.0497
21-22	0.0343	0.0352	0.037	0.0367	0.0415	0.0445	0.0467	0.0466	0.0479	0.0511	0.052	0.0481	0.0461	0.0482
22-23	0.0344	0.0353	0.0417	0.035	0.0415	0.0435	0.048	0.0486	0.0536	0.0544	0.0542	0.0511	0.0474	0.0479
23-24	0.0312	0.0333	0.0363	0.0347	0.04	0.041	0.0495	0.0501	0.0583	0.056	0.055	0.0539	0.0468	0.0454
24-25	0.0277	0.0343	0.036	0.0333	0.038	0.0375	0.0503	0.0515	0.0616	0.0577	0.0539	0.0547	0.0462	0.0431
25-26	0.0267	0.0323	0.0347	0.036	0.037	0.0405	0.0548	0.0541	0.0647	0.0595	0.055	0.0583	0.0475	0.0399
26-27	0.021	0.03	0.0333	0.034	0.0345	0.0375	0.055	0.0515	0.0623	0.0571	0.0512	0.0576	0.0452	0.0374
27-28	0.0166	0.033	0.0303	0.03	0.036	0.0355	0.0552	0.0483	0.0564	0.0518	0.0476	0.0559	0.0433	0.0328
28-29	0.0143	0.0315	0.0263	0.0267	0.0365	0.031	0.0498	0.0425	0.0469	0.0453	0.0411	0.0511	0.0395	0.0279
29-30	0.0113	0.0328	0.025	0.022	0.037	0.024	0.0395	0.0353	0.0364	0.0368	0.0343	0.0435	0.0343	0.0228

## Sheet: 4h SINE
Supplementary Table 4h The distribution of divergence rate for the class of SINE in plant clade
Species_type	Alage	Bryophyte	Lycophytes	Fern	Gymnosperms	ANA	Magnoliids	Monocots	Base	Super	Fabids	Malvids	Lamiids	Campanulids
0-1	0.053	0.0067	0.0423	0.0503	0	0.047	0	0.0068	0.0114	0.009	0.0076	0.0124	0.0084	0.0048
1-2	0.03	0.0497	0.032	0.0227	0	0.0065	0	0.0068	0.0131	0.0087	0.007	0.0072	0.0062	0.0052
2-3	0.0287	0.0132	0.0487	0.0263	0	0.032	0.0013	0.0131	0.0126	0.0152	0.0088	0.0127	0.012	0.0086
3-4	0.021	0.0185	0.0537	0.0207	0	0.0365	0.0018	0.0133	0.0179	0.0179	0.0096	0.0146	0.0127	0.0109
4-5	0.0176	0.01	0.0563	0.0233	0	0.011	0.0037	0.0181	0.0216	0.0261	0.011	0.018	0.0173	0.0144
5-6	0.0145	0.0065	0.06	0.026	0.0005	0.0295	0.0053	0.0198	0.0257	0.025	0.0132	0.0216	0.019	0.0186
6-7	0.0138	0.014	0.0507	0.0387	0.0005	0.0535	0.01	0.0213	0.0279	0.0275	0.0163	0.0254	0.018	0.0247
7-8	0.0176	0.0133	0.0553	0.04	0.0005	0.0505	0.0143	0.0236	0.0314	0.0294	0.0191	0.0271	0.0211	0.0284
8-9	0.0149	0.0165	0.049	0.0527	0.0015	0.079	0.0235	0.0284	0.0384	0.0348	0.0236	0.0293	0.0262	0.0306
9-10	0.0164	0.018	0.05	0.0567	0.0025	0.0555	0.0292	0.0305	0.0401	0.0335	0.0268	0.0323	0.0307	0.0343
10-11	0.0141	0.037	0.0407	0.0627	0.0055	0.0545	0.035	0.0328	0.0419	0.0367	0.0303	0.0333	0.031	0.0354
11-12	0.0127	0.0343	0.0417	0.0623	0.0075	0.0825	0.034	0.0359	0.0411	0.0415	0.0357	0.0347	0.034	0.0394
12-13	0.0163	0.0513	0.0343	0.055	0.013	0.038	0.0483	0.0347	0.0453	0.0405	0.0369	0.0379	0.0364	0.0427
13-14	0.0128	0.0398	0.036	0.0473	0.021	0.0525	0.0503	0.0362	0.0467	0.0428	0.0406	0.0412	0.0392	0.0457
14-15	0.0159	0.102	0.0377	0.0433	0.028	0.03	0.057	0.0368	0.0471	0.0414	0.0427	0.0393	0.041	0.0484
15-16	0.0181	0.0385	0.0377	0.0427	0.0355	0.0415	0.0617	0.0389	0.0517	0.0452	0.0445	0.0417	0.042	0.0547
16-17	0.0163	0.071	0.035	0.0383	0.0515	0.039	0.0665	0.0414	0.056	0.0459	0.0464	0.0425	0.0464	0.0567
17-18	0.0144	0.06	0.0303	0.036	0.066	0.035	0.071	0.0442	0.0534	0.045	0.0488	0.0439	0.046	0.055
18-19	0.0142	0.0798	0.029	0.0363	0.0785	0.036	0.0645	0.043	0.0556	0.0449	0.0482	0.0448	0.0448	0.0533
19-20	0.0135	0.038	0.0263	0.0297	0.0815	0.036	0.0585	0.0426	0.0559	0.0422	0.05	0.0463	0.0473	0.0507
20-21	0.0129	0.0483	0.0233	0.0337	0.101	0.026	0.0658	0.0455	0.0559	0.0449	0.0534	0.044	0.048	0.045
21-22	0.0136	0.0375	0.018	0.0323	0.0925	0.025	0.063	0.0449	0.0484	0.0452	0.0496	0.0456	0.0452	0.0423
22-23	0.0091	0.0417	0.0143	0.0333	0.082	0.026	0.0542	0.0455	0.0374	0.0402	0.0493	0.0411	0.0458	0.0393
23-24	0.0118	0.0358	0.018	0.024	0.0735	0.017	0.0488	0.0417	0.0336	0.0377	0.0463	0.0385	0.0392	0.0377
24-25	0.0068	0.024	0.013	0.0197	0.0595	0.018	0.0353	0.0383	0.024	0.0331	0.0399	0.0325	0.0349	0.0311
25-26	0.0073	0.037	0.0143	0.017	0.0545	0.0135	0.0338	0.0392	0.0199	0.0326	0.0391	0.0338	0.0333	0.0337
26-27	0.0069	0.01	0.0107	0.009	0.041	0.006	0.0222	0.0325	0.015	0.0273	0.0316	0.0273	0.0273	0.0271
27-28	0.0044	0.0148	0.0083	0.0087	0.0325	0.0055	0.0147	0.0285	0.0109	0.0241	0.0261	0.0241	0.0231	0.0214
28-29	0.0027	0.0092	0.0063	0.0043	0.022	0.0065	0.0107	0.024	0.007	0.0189	0.0205	0.0187	0.0178	0.0179
29-30	0.0021	0.0055	0.0053	0.003	0.015	0.008	0.0063	0.0191	0.0047	0.0141	0.0158	0.0148	0.0129	0.0138

## Sheet: 4i Simple repeat
Supplementary Table 4i The distribution of divergence rate for the class of Simple repeat in plant clade
Species_type	Alage	Bryophyte	Lycophytes	Fern	Gymnosperms	ANA	Magnoliids	Monocots	Base	Super	Fabids	Malvids	Lamiids	Campanulids
0-1	0.145	0.206	0.1993	0.456	0.162	0.3505	0.3698	0.2159	0.261	0.2256	0.2597	0.2088	0.2583	0.3033
1-2	0.0083	0.0025	0.004	0.0177	0.0045	0.009	0.0045	0.0049	0.0057	0.0055	0.0039	0.0026	0.0071	0.01
2-3	0.0211	0.017	0.0153	0.0323	0.0205	0.026	0.0192	0.0161	0.019	0.019	0.0163	0.0133	0.0206	0.0278
3-4	0.0289	0.0355	0.0263	0.035	0.0265	0.034	0.034	0.0272	0.0306	0.0297	0.0286	0.0256	0.0291	0.0308
4-5	0.0358	0.0467	0.0427	0.045	0.035	0.048	0.0522	0.0449	0.0534	0.0444	0.0472	0.0466	0.0452	0.0399
5-6	0.028	0.028	0.033	0.0313	0.026	0.0395	0.0375	0.0307	0.0406	0.0347	0.0335	0.0367	0.0353	0.0306
6-7	0.0205	0.0205	0.0207	0.0167	0.0195	0.016	0.0165	0.0163	0.0179	0.0184	0.0161	0.0157	0.0169	0.0181
7-8	0.0273	0.0325	0.0297	0.0213	0.0265	0.024	0.0265	0.0263	0.0283	0.028	0.0265	0.0266	0.0263	0.0246
8-9	0.0302	0.0373	0.037	0.0253	0.03	0.0305	0.0338	0.0323	0.0356	0.0344	0.0337	0.0343	0.0326	0.0284
9-10	0.0308	0.0363	0.0377	0.0247	0.0305	0.032	0.0345	0.0326	0.0371	0.0367	0.0351	0.036	0.0338	0.0287
10-11	0.0277	0.0305	0.0337	0.0187	0.025	0.023	0.0253	0.026	0.0266	0.028	0.0263	0.0262	0.0258	0.0224
11-12	0.0276	0.0315	0.0317	0.017	0.027	0.021	0.0232	0.0261	0.0259	0.0275	0.0259	0.0262	0.0252	0.0223
12-13	0.0333	0.039	0.0347	0.02	0.0345	0.0275	0.0305	0.0329	0.0331	0.0352	0.0339	0.0348	0.0319	0.0284
13-14	0.0364	0.0417	0.0383	0.0227	0.038	0.034	0.0362	0.0376	0.0404	0.0418	0.041	0.0424	0.0381	0.0328
14-15	0.0349	0.0365	0.0347	0.0183	0.035	0.0245	0.027	0.0323	0.0303	0.0329	0.0317	0.0334	0.0303	0.0277
15-16	0.0342	0.033	0.0317	0.017	0.0345	0.021	0.0212	0.0304	0.027	0.0298	0.0282	0.0311	0.0278	0.0259
16-17	0.0361	0.034	0.0337	0.017	0.037	0.023	0.0232	0.0324	0.0289	0.032	0.0305	0.0336	0.0301	0.028
17-18	0.0352	0.0323	0.031	0.016	0.0365	0.0195	0.0192	0.0303	0.0256	0.0289	0.0276	0.031	0.0277	0.0263
18-19	0.0381	0.0333	0.0327	0.016	0.0405	0.0225	0.0207	0.0331	0.0281	0.0317	0.0304	0.0343	0.0304	0.0288
19-20	0.0344	0.0292	0.03	0.0147	0.0365	0.02	0.0195	0.0301	0.0254	0.0291	0.028	0.0316	0.0277	0.0263
20-21	0.0361	0.0305	0.0307	0.0153	0.037	0.0205	0.0187	0.0311	0.0259	0.0296	0.0283	0.0323	0.0284	0.0268
21-22	0.0356	0.0297	0.0297	0.015	0.039	0.0195	0.0178	0.0307	0.024	0.0288	0.0275	0.0316	0.0278	0.0259
22-23	0.0321	0.0248	0.0257	0.0137	0.0335	0.018	0.0158	0.0272	0.0217	0.0254	0.0244	0.0278	0.0246	0.0231
23-24	0.0293	0.0215	0.0227	0.0113	0.03	0.016	0.0132	0.0245	0.0187	0.0221	0.0214	0.0247	0.0218	0.0203
24-25	0.0299	0.0217	0.0237	0.0123	0.0295	0.0155	0.0125	0.0254	0.019	0.0218	0.0209	0.0249	0.0214	0.0202
25-26	0.0246	0.0158	0.0183	0.0093	0.0235	0.0125	0.0095	0.0208	0.0149	0.0172	0.0165	0.0194	0.0168	0.0161
26-27	0.0204	0.0127	0.0153	0.0077	0.0185	0.0105	0.0077	0.017	0.012	0.0137	0.0131	0.0155	0.0134	0.013
27-28	0.0187	0.0107	0.0133	0.007	0.017	0.009	0.0067	0.0157	0.0106	0.0124	0.0116	0.0139	0.0119	0.0114
28-29	0.0151	0.0085	0.0113	0.0067	0.0125	0.008	0.0058	0.0126	0.0087	0.0098	0.0092	0.0109	0.0092	0.009
29-30	0.0119	0.0063	0.009	0.0047	0.01	0.0065	0.004	0.01	0.0066	0.0073	0.0068	0.0082	0.0069	0.0069

## Sheet: 4j Low complexity
Supplementary Table 4j The distribution of divergence rate for the class of Low complexity in plant clade
Species_type	Alage	Bryophyte	Lycophytes	Fern	Gymnosperms	ANA	Magnoliids	Monocots	Base	Super	Fabids	Malvids	Lamiids	Campanulids
0-1	0.0003	0.0003	0	0.0003	0	0	0	0	0.0001	0	0	0	0	0
1-2	0	0	0	0	0	0	0	0	0	0	0	0	0	0
2-3	0.0005	0.0005	0.0007	0.0003	0	0	0.0003	0.0002	0.0001	0.0001	0	0.0001	0.0001	0.0001
3-4	0.0019	0.0013	0.0017	0.0027	0.002	0.002	0.0025	0.0024	0.0021	0.0018	0.0017	0.0018	0.0018	0.0017
4-5	0.0011	0.0008	0.001	0.001	0.0005	0.0005	0.001	0.0009	0.001	0.0007	0.0007	0.0007	0.0006	0.001
5-6	0.0025	0.002	0.0037	0.0027	0.001	0.0015	0.0025	0.002	0.002	0.0016	0.0015	0.0016	0.0016	0.0016
6-7	0.0054	0.0048	0.0073	0.006	0.0045	0.0045	0.0057	0.0058	0.005	0.0051	0.0045	0.0049	0.0046	0.0047
7-8	0.0092	0.0105	0.0123	0.0097	0.0085	0.008	0.01	0.0103	0.0099	0.0086	0.0082	0.0088	0.0084	0.0084
8-9	0.0104	0.0118	0.0133	0.011	0.009	0.009	0.0105	0.0114	0.0109	0.0095	0.0092	0.0095	0.0092	0.0093
9-10	0.0136	0.0145	0.0183	0.015	0.0115	0.012	0.013	0.0139	0.0134	0.0126	0.0116	0.0121	0.012	0.0124
10-11	0.0204	0.0222	0.0273	0.0217	0.018	0.0205	0.0215	0.0223	0.0224	0.0201	0.0191	0.0198	0.0196	0.02
11-12	0.0255	0.029	0.0313	0.0277	0.025	0.0255	0.028	0.0293	0.0283	0.026	0.0243	0.0253	0.0246	0.0246
12-13	0.0345	0.0393	0.0443	0.0367	0.0345	0.0355	0.0358	0.0381	0.0371	0.0352	0.0337	0.0346	0.0344	0.0342
13-14	0.0335	0.038	0.042	0.034	0.033	0.033	0.033	0.0363	0.0354	0.0335	0.0321	0.033	0.0324	0.0321
14-15	0.0433	0.048	0.051	0.045	0.043	0.043	0.042	0.0466	0.0454	0.0426	0.0417	0.0434	0.0426	0.0434
15-16	0.0601	0.0678	0.0677	0.065	0.0565	0.067	0.0725	0.0624	0.0659	0.0636	0.0637	0.061	0.0624	0.0622
16-17	0.0634	0.07	0.0663	0.0673	0.0635	0.073	0.0828	0.0689	0.0736	0.0724	0.0734	0.0689	0.0715	0.0708
17-18	0.0601	0.0635	0.0613	0.0587	0.059	0.0635	0.0675	0.0603	0.0641	0.062	0.0621	0.0602	0.0608	0.0632
18-19	0.0684	0.0717	0.0647	0.0697	0.068	0.0695	0.073	0.0673	0.0711	0.0707	0.0708	0.0693	0.0707	0.0712
19-20	0.0629	0.0648	0.0623	0.059	0.0635	0.065	0.0678	0.0628	0.0673	0.0665	0.0667	0.0657	0.0663	0.0662
20-21	0.0602	0.0602	0.0633	0.0623	0.065	0.0625	0.0658	0.0627	0.0639	0.0663	0.0662	0.066	0.0667	0.0669
21-22	0.0616	0.0628	0.0613	0.0583	0.0655	0.0625	0.0622	0.0618	0.0617	0.0644	0.065	0.065	0.0655	0.0659
22-23	0.0549	0.0542	0.0497	0.0537	0.06	0.055	0.0545	0.0541	0.0536	0.0567	0.0573	0.0571	0.0576	0.0583
23-24	0.0483	0.0493	0.046	0.0457	0.054	0.048	0.0467	0.0481	0.0471	0.0504	0.0512	0.0515	0.0518	0.0519
24-25	0.0493	0.0473	0.048	0.0467	0.0535	0.0485	0.0425	0.0482	0.045	0.0484	0.049	0.0508	0.0501	0.0494
25-26	0.0391	0.0383	0.0387	0.0387	0.042	0.0365	0.0328	0.0387	0.0371	0.0385	0.0392	0.0402	0.0394	0.0392
26-27	0.0317	0.0297	0.0267	0.033	0.0345	0.0295	0.0263	0.0306	0.0289	0.0306	0.0314	0.0322	0.0318	0.032
27-28	0.0303	0.0265	0.0223	0.0287	0.0315	0.03	0.0235	0.0288	0.0259	0.028	0.0286	0.0295	0.0291	0.0291
28-29	0.025	0.021	0.0197	0.0243	0.025	0.0245	0.019	0.0225	0.0219	0.0225	0.0232	0.0237	0.0232	0.0224
29-30	0.0202	0.0143	0.0127	0.0197	0.019	0.0185	0.0158	0.0171	0.0157	0.0171	0.0173	0.0178	0.017	0.0168

[truncated: 2 more sheets: 4k Satellite, 4l RNA]
